# Supplementary material for: New electrophiles targeting thiols in a reversible covalent manner
Source: Royal Society of Chemistry journal article supplement (doi:10.1039/d4cc04612a), 2024-01-01
Supplement: d4cc04612a1.xlsx [file d4cc04612a1.xlsx]

## Sheet: Sheet1
Worksheet	Information
III-2 100 µM	Competitive data for 100 µM III-2 in U87MG cell lysate
III-3 100 µM	Competitive data for 100 µM III-3 in U87MG cell lysate

## Sheet: III-2 100 µM
Peptide Sequence	Protein Description	Protein ID	Gene	Log2(R) III-2 100 μM_1	Log2(R) III-2 100 μM_2	Media Log2(R) III-2 100 μM	ngtive log10(p)
AAAPAPEEEMDECEQALAAEPK	Elongation factor 1-gamma	P26641	EEF1G	-0.799234	-0.230912	-0.515073	0.493568
AAAPAPVSEAVCR	Calpastatin	P20810	CAST	0.0937248	-0.107631	-0.00695304	0.0194952
AAASGQPRPEMQCPAEHEEDMYR	Ubiquitin thioesterase otulin	Q96BN8	OTULIN	0.536935		0.536935
AACCLAGAR	6-phosphogluconolactonase	O95336	PGLS		-2.03783	-2.03783
AACLLDGVPVALKK	Serine/threonine-protein kinase Nek7	Q8TDX7	NEK7	-0.789361	3.29977	1.2552	0.187433
AACNLLQR	ATP-dependent 6-phosphofructokinase, platelet type	Q01813	PFKP	-0.250291		-0.250291
AACQEAQVFGNQLIPPNAQVK	Acylglycerol kinase, mitochondrial	Q53H12	AGK	2.40235	1.37342	1.88789	0.77116
AACSAAAMEEDSEASSSR	Ubiquitin-protein ligase E3A	Q05086	UBE3A		0.778331	0.778331
AADISESSGADCKGDPR	Density-regulated protein	O43583	DENR		0.422423	0.422423
AAEQAGCMVSASR	Peroxisomal leader peptide-processing protease	Q2T9J0	TYSND1	1.67979	0.299688	0.989737	0.411612
AAFGLSEAGFNTACVTK	Succinate dehydrogenase [ubiquinone] flavoprotein subunit, mitochondrial	P31040	SDHA	-0.412338	-0.385858	-0.399098	1.67548
AALAACPSSPFPPAMPR	GH3 domain-containing protein	Q8N2G8	GHDC	0.313109		0.313109
AALEACHK	Alcohol dehydrogenase class-3	P11766	ADH5		0.0452669	0.0452669
AALEALGSCLNNK	Serine hydroxymethyltransferase, mitochondrial	P34897	SHMT2	1.04702	0.425045	0.736032	0.594313
AALGHLAGEAAAAPGPGTPCASR	UPF0488 protein C8orf33	Q9H7E9	C8orf33	0.136222	-0.0535111	0.0413556	0.131774
AAMGNFVDLCR	tRNA (uracil-5-)-methyltransferase homolog A	Q8IZ69	TRMT2A		-2.26264	-2.26264
AANGLEADNSCPNSK	Leucine zipper protein 1	Q86V48	LUZP1	1.89856	0.778587	1.33857	0.598183
AAPAGGFQNIACLR	tRNA (guanine-N(7)-)-methyltransferase	Q9UBP6	METTL1		2.81958	2.81958
AAPCEGQAFAVGVEK	Nuclear-interacting partner of ALK	Q86WB0	ZC3HC1	-0.0879349	-0.597537	-0.342736	0.390426
AAPPGEYFSVGSQVSCR	Protein LSM12 homolog	Q3MHD2	LSM12		-1.14599	-1.14599
AAQLCGAGMAAVVDR	Hexokinase-2	P52789	HK2	0.30505		0.30505
AAREECPVFTPPGGETLDQVK	Fructose-2,6-bisphosphatase TIGAR	Q9NQ88	TIGAR	-0.304495		-0.304495
AATDAQDANQCCTSCEDNAPATSYCVECSEPLCETCVEAHQR	Transcription intermediary factor 1-beta	Q13263	TRIM28	2.31848	3.83339	3.07593	0.813295
AATECMCNLAMSK	Protein unc-45 homolog A	Q9H3U1	UNC45A		0.93223	0.93223
AATGANAEKAESHNDCPVR	Uridine phosphorylase 1	Q16831	UPP1		0.855119	0.855119
AAVAAGCR	Cytosol aminopeptidase	P28838	LAP3		-0.736869	-0.736869
AAVATCGSVAASTGSAVATASK	Elongator complex protein 4	Q96EB1	ELP4	-0.1658		-0.1658
AAVEEGIVLGGGCALLR	60 kDa heat shock protein, mitochondrial	P10809	HSPD1		-0.166805	-0.166805
AAYCACR	Prolow-density lipoprotein receptor-related protein 1	Q07954	LRP1	1.22805	0.322979	0.775514	0.473305
ACAAAR	Signal recognition particle 19 kDa protein	P09132	SRP19	-0.136288		-0.136288
ACAAGTPAVIR	Host cell factor 1	P51610	HCFC1		1.10686	1.10686
ACARPLISVYSEK	60S ribosomal protein L4	P36578	RPL4	0.0194026	0.0288921	0.0241473	0.908275
ACARPLISVYSEKGESSGK	60S ribosomal protein L4	P36578	RPL4	0.106783	0.358284	0.232533	0.500866
ACAVVFDCK	GTP-binding protein REM 1	O75628	REM1		-0.94817	-0.94817
ACDELVEEMEHYGK	Procollagen-lysine,2-oxoglutarate 5-dioxygenase 2	O00469	PLOD2	1.24797	0.917136	1.08255	1.01533
ACFHCETCK	LIM and SH3 domain protein 1	Q14847	LASP1		0.48062	0.48062
ACGLVASNLNLKPGECLR	Galectin-1	P09382	LGALS1	-1.73986	-0.337348	-1.0386	0.422421
ACGVSRPVIACSVTIK	NHP2-like protein 1	P55769	SNU13	1.03503		1.03503
ACIACR	DnaJ homolog subfamily C member 7	Q99615	DNAJC7	-0.149116		-0.149116
ACIAEK	Destrin	P60981	DSTN	-0.334044	-0.218397	-0.276221	0.881498
ACPHVWFER	Glycerol-3-phosphate acyltransferase 3	Q53EU6	GPAT3	1.42597		1.42597
ACQSCPSEPNTAALQAALAR	Importin-4	Q8TEX9	IPO4	1.17333	1.68165	1.42749	0.950119
ACQSIYPLHDVFVR	40S ribosomal protein S3a	P61247	RPS3A	-0.413434	0.195976	-0.108729	0.106905
ACSNPSFLR	Molybdate-anion transporter	Q6N075	MFSD5		-0.147031	-0.147031
ACVGNAYHK	Nuclear pore complex protein Nup50	Q9UKX7	NUP50	0.548356		0.548356
ACYGVLR	40S ribosomal protein S3	P23396	RPS3	-0.158344		-0.158344
ADEIDFTTGDAGASSTYPMQCSALRK	Eukaryotic translation initiation factor 5A-2	Q9GZV4	EIF5A2		-0.5149	-0.5149
ADFPAGIPECGTDALR	Valine--tRNA ligase	P26640	VARS1		-2.33352	-2.33352
ADLPEGVAVSGPSPAEFCR	Mitochondrial Rho GTPase 2	Q8IXI1	RHOT2	-2.6812		-2.6812
ADLPPCGACITGR	Cytosolic acyl coenzyme A thioester hydrolase	O00154	ACOT7	-8.23451	-0.200045	-4.21728	0.314673
ADMTCR	Histone acetyltransferase type B catalytic subunit	O14929	HAT1	-0.133451		-0.133451
ADVEDGEETCALASHSGSSGSK	RING-box protein 2	Q9UBF6	RNF7	1.01354	0.0887561	0.551147	0.352233
ADWTPLMMACTR	Ankyrin repeat domain-containing protein 16	Q6P6B7	ANKRD16		0.267734	0.267734
AEAGEAGQATAEAECHR	Probable bifunctional dTTP/UTP pyrophosphatase/methyltransferase protein	O95671	ASMTL	0.130871		0.130871
AEETCAPSVSYFK	G1/S-specific cyclin-D1	P24385	CCND1		1.85477	1.85477
AEGLEEADTGASGCHSHPEEQPTSISPSR	Melanophilin	Q9BV36	MLPH	-1.36355	0.882872	-0.240339	0.062581
AENEEAAACPAWER	Microtubule-associated protein 1A	P78559	MAP1A	0.576861	-0.310376	0.133242	0.0892443
AEPSAATQSHSISSSSFGAEPSAPGGGGSPGACPALGTK	Reticulon-3	O95197	RTN3	0.758286	0.829959	0.794122	1.54198
AESHNDCPVR	Uridine phosphorylase 1	Q16831	UPP1		0.935482	0.935482
AETEEAEEPEEDGEEHVCVSASK	Microtubule-associated protein 1B	P46821	MAP1B	1.16287	-2.77781	-0.807472	0.123554
AFCSGCLSFSAAVPR	Abscission/NoCut checkpoint regulator	Q96K21	ZFYVE19	0.753255	-0.158928	0.297163	0.199023
AFPQLGGRPGPEGEGSLESQPPPLQTQACPESSCLR	Protein HEXIM1	O94992	HEXIM1	1.00365		1.00365
AFQNTATACAPVSHYR	Phosphorylated adapter RNA export protein	Q9H814	PHAX	1.74572	-0.195844	0.774938	0.243271
AFQYVETHGEVCPANWTPDSPTIKPSPAASK	Thioredoxin-dependent peroxide reductase, mitochondrial	P30048	PRDX3	0.214868	0.712295	0.463582	0.503782
AFSPGLPPQSCSLNLK	Fat storage-inducing transmembrane protein 2	Q8N6M3	FITM2	4.33596		4.33596
AFSYICR	Protein numb homolog	P49757	NUMB	-4.0939	-0.50649	-2.3002	0.375062
AGAIAPCEVTVPAQNTGLGPEK	60S acidic ribosomal protein P0	P05388	RPLP0	-0.0256707	-0.172888	-0.0992795	0.391303
AGCSNIAYPR	Sodium/myo-inositol cotransporter	P53794	SLC5A3		0.432703	0.432703
AGDTVIPLYIPQCGECK	Alcohol dehydrogenase class-3	P11766	ADH5		0.00289395	0.00289395
AGEPNSPDAEEANSPDVTAGCDPAGVHPPR	RNA cytosine C(5)-methyltransferase NSUN2	Q08J23	NSUN2		1.52809	1.52809
AGGGCVMTIGEMLR	Pre-mRNA-splicing factor 38B	Q5VTL8	PRPF38B		-0.474124	-0.474124
AGGGPTLQCPPPSSPEK	Lysophospholipid acyltransferase 7	Q96N66	MBOAT7	0.747988	0.924255	0.836121	1.17485
AGKLCVPAMNVNDSVTK	S-adenosylhomocysteine hydrolase-like protein 1	O43865	AHCYL1	0.224849	-0.187401	0.0187239	0.0257974
AGKPVICATQMLESMIK	Pyruvate kinase PKM	P14618	PKM		-0.330043	-0.330043
AGLNCSTENMPIK	Eukaryotic translation initiation factor 2 subunit 1	P05198	EIF2S1		-0.121014	-0.121014
AGMAAVASPTGNCDLER	Long-chain fatty acid transport protein 4	Q6P1M0	SLC27A4		0.66655	0.66655
AGPGSLELCGLPSQK	Ribosomal RNA processing protein 1 homolog B	Q14684	RRP1B	-1.08289		-1.08289
AGQCVIGLQMGTNK	Calponin-2	Q99439	CNN2	0.0626156	0.239239	0.150927	0.472326
AGSDGESIGNCPFSQR	Chloride intracellular channel protein 4	Q9Y696	CLIC4	-0.374534	-0.337535	-0.356035	1.48084
AHEILPNLVCCSAK	T-complex protein 1 subunit theta	P50990	CCT8	-0.036276	0.257424	0.110574	0.229792
AHGCFQDGR	Probable E3 ubiquitin-protein ligase IRF2BPL	Q9H1B7	IRF2BPL		-0.163457	-0.163457
AHQLVMEGYNWCHDR	Serine/threonine-protein phosphatase 2A catalytic subunit beta isoform	P62714	PPP2CB	1.72097		1.72097
AHVVPCFDASK	Filamin-A	P21333	FLNA	1.50839		1.50839
AIDENNEPTACFLIR	Rabankyrin-5	Q9P2R3	ANKFY1	0.102461	-0.593339	-0.245439	0.215482
AILPCIK	Eukaryotic initiation factor 4A-I	P60842	EIF4A1	-0.0927252	-0.422351	-0.257538	0.440793
AITIAGVPQSVTECVK	Poly(rC)-binding protein 1	Q15365	PCBP1	0.158465	-1.15116	-0.496348	0.231297
AIVDALPPPCESACTVPTDVDKWFHHQK	Inorganic pyrophosphatase	Q15181	PPA1		0.462356	0.462356
AKFENLCK	Heat shock protein HSP 90-beta	P08238	HSP90AB1	0.0735453	0.671349	0.372447	0.36599
AKPCGVR	Proteasome activator complex subunit 2	Q9UL46	PSME2	0.202596	0.280434	0.241515	0.99262
ALACSSLQER	Amyloid-beta A4 precursor protein-binding family B member 2	Q92870	APBB2		-2.23842	-2.23842
ALANSLACQGK	Fructose-bisphosphate aldolase A	P04075	ALDOA	-1.00274	-0.396864	-0.699803	0.584889
ALCDLGPWVK	Vitamin K epoxide reductase complex subunit 1-like protein 1	Q8N0U8	VKORC1L1	1.66205	2.44001	2.05103	0.923295
ALCDVGTAISCSR	Vitamin K epoxide reductase complex subunit 1	Q9BQB6	VKORC1	0.711863	0.915142	0.813503	1.10166
ALCGLDESK	Lon protease homolog, mitochondrial	P36776	LONP1		0.0824739	0.0824739
ALCHTTSSPLPGDVK	5-azacytidine-induced protein 2	Q9H6S1	AZI2		2.118	2.118
ALCNGDSKLENAGGDLK	GMP synthase [glutamine-hydrolyzing]	P49915	GMPS		0.275595	0.275595
ALCYLVLK	Mitochondrial import receptor subunit TOM34	Q15785	TOMM34	-2.43483		-2.43483
ALEMCPSCFQK	Tetratricopeptide repeat protein 1	Q99614	TTC1		4.40126	4.40126
ALLDVCGAPR	Proteasome subunit beta type-8	P28062	PSMB8		1.32852	1.32852
ALQAQEIECR	Procollagen galactosyltransferase 1	Q8NBJ5	COLGALT1	-1.61839	0.369838	-0.624276	0.191772
ALTNLPHTDFTLCK	Eukaryotic translation initiation factor 3 subunit K	Q9UBQ5	EIF3K		1.20716	1.20716
ALVDGPCTQVR	60S ribosomal protein L14	P50914	RPL14	0.417792	0.10554	0.261666	0.46537
ALVDHENVISCPHLGASTK	D-3-phosphoglycerate dehydrogenase	O43175	PHGDH	-0.152755	0.0971262	-0.0278144	0.0652243
AMAEGERTECAEPPRDEPPADGALK	Serine/threonine-protein phosphatase 5	P53041	PPP5C	-1.05491		-1.05491
ANACNSVIK	Sarcoplasmic/endoplasmic reticulum calcium ATPase 2	P16615	ATP2A2	0.611272	0.77254	0.691906	1.1316
ANDGGLAAGAPAMHMASYGPEPCTDNSDSLIAK	A-kinase anchor protein 8	O43823	AKAP8		-0.415504	-0.415504
ANEQEPCGWWLAR	Fragile X mental retardation syndrome-related protein 2	P51116	FXR2	-1.23205		-1.23205
ANNSPALTGNSQPQHQAAAAAAQQQQQCGGGGATKPAVSGK	Pre-mRNA-splicing factor 38B	Q5VTL8	PRPF38B	0.881629	0.778848	0.830238	1.40499
ANQGDEACTHCPINSR	Ephrin type-B receptor 2	P29323	EPHB2	-1.32862		-1.32862
ANSIQGCK	Coiled-coil domain-containing protein 25	Q86WR0	CCDC25		0.842428	0.842428
ANSSVVSVNCK	Protein O-GlcNAcase	O60502	OGA		-0.363166	-0.363166
ANVPWAEVCEK	KIF-binding protein	Q96EK5	KIFBP		-2.18426	-2.18426
APGAAAPSSGPGPCAAAR	Phosphatidylinositol 3,4,5-trisphosphate-dependent Rac exchanger 1 protein	Q8TCU6	PREX1	0.942311	-0.220442	0.360935	0.189567
APLQQCAEDR	Condensin complex subunit 2	Q15003	NCAPH	-0.0736393	0.318043	0.122202	0.190542
APQCLGK	Heterogeneous nuclear ribonucleoprotein U	Q00839	HNRNPU	0.281795	0.37274	0.327268	1.05605
AQCPIVER	40S ribosomal protein S5	P46782	RPS5	-0.022587	0.0557609	0.0165869	0.127835
AQEFVNCK	Glutaredoxin-1	P35754	GLRX	-0.293537	-0.204239	-0.248888	0.946906
AQNTWGCGNSLR	Prelamin-A/C	P02545	LMNA	0.197104		0.197104
AQQEQLLLQKQLQQQQQQPPSQLCTAPASSHER	A-kinase anchor protein 2	Q9Y2D5	AKAP2		1.17926	1.17926
ARPCIIPENEEIPR	LIM and senescent cell antigen-like-containing domain protein 3	P0CW19	LIMS3	-0.291892	-0.405004	-0.348448	0.989553
ASCASIDIEDATQHLR	Enhancer of mRNA-decapping protein 4	Q6P2E9	EDC4		0.468224	0.468224
ASCLYGQLPK	Glutathione S-transferase P	P09211	GSTP1	-0.502078	-0.165757	-0.333918	0.527248
ASFENNCEIGCFAK	Eukaryotic translation initiation factor 6	P56537	EIF6	0.0497992	0.134813	0.092306	0.561088
ASFVTCPCCYGFIQNTSK	Glutathione S-transferase C-terminal domain-containing protein	Q8NEC7	GSTCD	-1.08776	-1.26838	-1.17807	1.3124
ASGCEGEDVVTLLK	Hexokinase-2	P52789	HK2	0.460298	0.954177	0.707237	0.669875
ASGGGGCSASER	Sorting nexin-1	Q13596	SNX1		0.0247662	0.0247662
ASGQPAGPDNKENCPVPGKPGEAVAAR	Thymidine kinase, cytosolic	P04183	TK1	1.35652	0.656683	1.0066	0.671652
ASGSTLNSGSGNCPR	DDB1- and CUL4-associated factor 5	Q96JK2	DCAF5	0.662084	-0.821555	-0.0797355	0.0306616
ASGVQVADEVCR	Destrin	P60981	DSTN	-0.222757	-0.204071	-0.213414	1.55514
ASTASPCNNNINAATAVALQEPR	La-related protein 4	Q71RC2	LARP4	-0.391297		-0.391297
ASTTTCTR	Calcium/calmodulin-dependent protein kinase type II subunit delta	Q13557	CAMK2D	-0.142343	0.202827	0.0302417	0.050821
ASVGECPAPVPVK	ATP synthase subunit f, mitochondrial	P56134	ATP5MF	0.118227	0.0487426	0.0834849	0.600236
ASVGECPAPVPVKDK	ATP synthase subunit f, mitochondrial	P56134	ATP5MF	0.724555	1.08985	0.907203	0.897976
ASVGFGGSCFQK	UDP-glucose 6-dehydrogenase	O60701	UGDH		1.58129	1.58129
ATCAPQHGAPGPGPADASK	Filamin-A	P21333	FLNA	-1.22667	1.15969	-0.0334925	0.0078289
ATDCVGHDVVTLLR	Hexokinase-1	P19367	HK1	-0.918767		-0.918767
ATDYGPEEVCER	TSC22 domain family protein 2	O75157	TSC22D2	0.361695	2.45477	1.40823	0.390547
ATHGQTCARPMCIPPSYADLGK	Voltage-dependent anion-selective channel protein 2	P45880	VDAC2	1.44353	2.66743	2.05548	0.73468
ATQAHSLSYAGCNFLR	RNA 3'-terminal phosphate cyclase-like protein	Q9Y2P8	RCL1	1.33241	1.46783	1.40012	1.51197
ATVFLNPAACK	Acylglycerol kinase, mitochondrial	Q53H12	AGK	0.207145	1.01365	0.610396	0.429843
AVACDCLLQEHFYLR	39S ribosomal protein S30, mitochondrial	Q9NP92	MRPS30		-0.553304	-0.553304
AVASQLDCNFLK	26S proteasome regulatory subunit 10B	P62333	PSMC6	1.20745	0.337745	0.772599	0.486297
AVCMLSNTTAIAEAWAR	Tubulin alpha-4A chain	P68366	TUBA4A		-1.01551	-1.01551
AVCMLSNTTAVAEAWAR	Tubulin alpha-1C chain	Q9BQE3	TUBA1C		0.314661	0.314661
AVECPPPR	Lysine--tRNA ligase	Q15046	KARS1	1.77136	2.14587	1.95861	1.21695
AVGIWHCGSCMK	60S ribosomal protein L37a	P61513	RPL37A	-0.0231114		-0.0231114
AVLCPQPTR	Ras-related C3 botulinum toxin substrate 2	P15153	RAC2	0.526093	0.307946	0.417019	0.788179
AVLFCLSEDKK	Cofilin-1	P23528	CFL1	-2.50784	-1.11089	-1.80936	0.62979
AVLGEVKLCEK	Elongation factor 1-gamma	P26641	EEF1G	-0.280356	-0.544804	-0.41258	0.704563
AVVVCPKDEDYK	Heterogeneous nuclear ribonucleoprotein U	Q00839	HNRNPU		0.322936	0.322936
AVVVCPKDEDYKQR	Heterogeneous nuclear ribonucleoprotein U	Q00839	HNRNPU		0.0758662	0.0758662
AVYSTNCPVWEEAFR	Extended synaptotagmin-1	Q9BSJ8	ESYT1		0.384432	0.384432
AVYTQDCPLAAAK	Alanine--tRNA ligase, cytoplasmic	P49588	AARS1	0.0332921	-0.315602	-0.141155	0.246487
AWASNCQFSHNTR	Glioma pathogenesis-related protein 1	P48060	GLIPR1	0.75883		0.75883
AWCVNCFACSTCNTK	LIM and senescent cell antigen-like-containing domain protein 1	P48059	LIMS1	-0.626741	-0.700356	-0.663549	1.4525
AWLVSSGCPLQVK	SURP and G-patch domain-containing protein 2	Q8IX01	SUGP2	-0.647226		-0.647226
AWNAVCPLVVR	Protein FAM49A	Q9H0Q0	FAM49A	0.0692062		0.0692062
AWNAYPYCR	Phosphatidylinositol transfer protein beta isoform	P48739	PITPNB	1.2842		1.2842
AYCEGCYVATLEK	Thyroid receptor-interacting protein 6	Q15654	TRIP6	-0.148048	-0.409809	-0.278929	0.553927
AYCEPCYINTLEQCNVCSKPIMER	Lipoma-preferred partner	Q93052	LPP	1.09498	0.67671	0.885846	0.830928
AYEYVECPIR	Cytochrome c-type heme lyase	P53701	HCCS	2.06129	-0.0904763	0.985406	0.277428
AYGGSMCAK	60S ribosomal protein L34	P49207	RPL34	-0.174541	-0.153653	-0.164097	1.39294
AYHEQLSVAEITNACFEPANQMVK	Tubulin alpha-4A chain	P68366	TUBA4A		0.25791	0.25791
AYHEQLTVAEITNACFEPANQMVK	Tubulin alpha-1C chain	Q9BQE3	TUBA1C		0.160983	0.160983
AYHSFLVEPISCHAWNK	Actin-related protein 2/3 complex subunit 1B	O15143	ARPC1B		0.0678536	0.0678536
AYHSFLVEPISCHAWNKDR	Actin-related protein 2/3 complex subunit 1B	O15143	ARPC1B	0.069378		0.069378
CACPTNFYLGSDGR	Prolow-density lipoprotein receptor-related protein 1	Q07954	LRP1	0.160378	1.94837	1.05437	0.348998
CAEIFAR	Phenylalanine--tRNA ligase beta subunit	Q9NSD9	FARSB		-0.443321	-0.443321
CAFVLTR	N-acylglucosamine 2-epimerase	P51606	RENBP	-1.68422	-0.779785	-1.232	0.649837
CAGAPQK	Sulfide:quinone oxidoreductase, mitochondrial	Q9Y6N5	SQOR	0.490949	0.77919	0.635069	0.847508
CAGCTNPISGLGGTK	Four and a half LIM domains protein 2	Q14192	FHL2	-0.378719	0.0932127	-0.142753	0.184665
CAGDWLPR	Alpha-1,3/1,6-mannosyltransferase ALG2	Q9H553	ALG2	0.407967		0.407967
CAGNEDIITLR	Proliferating cell nuclear antigen	P12004	PCNA	-0.415026	-0.437712	-0.426369	1.77128
CALDFFR	NADH dehydrogenase [ubiquinone] 1 alpha subcomplex subunit 8	P51970	NDUFA8		0.587173	0.587173
CALNEHSLER	Sorting nexin-29	Q8TEQ0	SNX29	-1.4574	-1.66451	-1.56095	1.37497
CALSSVDIYR	Protein MEMO1	Q9Y316	MEMO1		0.470894	0.470894
CANCFDCPGCMHTLSTR	Dynactin subunit 4	Q9UJW0	DCTN4	-0.504171	-0.260964	-0.382568	0.707904
CAPMSDLTDLK	Proliferation marker protein Ki-67	P46013	MKI67		2.13241	2.13241
CAQDYLAR	Transforming acidic coiled-coil-containing protein 1	O75410	TACC1		1.94554	1.94554
CAQGCICK	Metallothionein-2	P02795	MT2A	-0.113744	-0.0513981	-0.0825708	0.638632
CAQGCVCK	Metallothionein-1F	P04733	MT1F	-2.94792	0.00240712	-1.47276	0.300579
CAQYWPQKEEK	Tyrosine-protein phosphatase non-receptor type 1	P18031	PTPN1	0.391828	0.896534	0.644181	0.623983
CASCPYLGMPAFKPGEK	Anamorsin	Q6FI81	CIAPIN1	0.195077	0.276594	0.235836	0.96278
CASQSGMTAYGTR	Calponin-2	Q99439	CNN2	0.218183	0.812177	0.51518	0.477656
CASQVGMTAPGTR	Calponin-2	Q99439	CNN2	0.590549	0.12546	0.358005	0.43565
CATSKPAFFAEK	Annexin A1	P04083	ANXA1	-3.69191		-3.69191
CAVVGNSGNLR	CMP-N-acetylneuraminate-beta-galactosamide-alpha-2,3-sialyltransferase 1	Q11201	ST3GAL1	1.63393		1.63393
CCCVADR	Succinate dehydrogenase [ubiquinone] flavoprotein subunit, mitochondrial	P31040	SDHA	-0.480297		-0.480297
CCGLCVCPCNR	Synaptosomal-associated protein 23	O00161	SNAP23	0.42492	0.708227	0.566573	0.806963
CCLTYCFNKPEDK	Ubiquitin-40S ribosomal protein S27a	P62979	RPS27A	0.454305	0.53838	0.496342	1.2693
CCSGAIIVLTK	Pyruvate kinase PKM	P14618	PKM	-0.593726	-0.627102	-0.610414	1.75945
CCTESLVNR	Serum albumin	P02768	ALB	2.86375	1.53821	2.20098	0.730012
CDGGPDCK	Low-density lipoprotein receptor	P01130	LDLR		0.475831	0.475831
CDKVAQDLCK	Electron transfer flavoprotein subunit alpha, mitochondrial	P13804	ETFA		0.33732	0.33732
CDLELETNGR	Protein-glutamine gamma-glutamyltransferase 2	P21980	TGM2	0.194797	-0.508966	-0.157085	0.135071
CDLHRLEEGPPVTTVLTR	Pyruvate dehydrogenase E1 component subunit alpha, somatic form, mitochondrial	P08559	PDHA1	0.52953	0.220768	0.375149	0.604614
CDLISIPK	Coronin-1C	Q9ULV4	CORO1C	-0.711028	-0.160405	-0.435716	0.445214
CDMDQFQCK	Prolow-density lipoprotein receptor-related protein 1	Q07954	LRP1	2.6778	1.12777	1.90278	0.608646
CDPVDYSNSPEALR	Elongation of very long chain fatty acids protein 1	Q9BW60	ELOVL1	2.36061	-0.702051	0.829281	0.164926
CDSSPDSAEDVR	Alpha-2-HS-glycoprotein	P02765	AHSG	-0.335998	0.36584	0.0149212	0.0119108
CDSSPDSAEDVRK	Alpha-2-HS-glycoprotein	P02765	AHSG	0.911624	0.195322	0.553473	0.436957
CDVDIR	Actin, cytoplasmic 1	P60709	ACTB	0.0992308	0.161943	0.130587	0.823842
CDVDIRK	Actin, cytoplasmic 1	P60709	ACTB	0.0765897	-0.219064	-0.071237	0.146229
CEDCGKPLSIEADDNGCFPLDGHVLCR	Zyxin	Q15942	ZYX	-0.0604718	0.095707	0.0176176	0.0661391
CEECGLLLSSEGECQGCYPLDGHILCK	Thyroid receptor-interacting protein 6	Q15654	TRIP6		1.15819	1.15819
CEFAVGYQR	Leucine--tRNA ligase, cytoplasmic	Q9P2J5	LARS1	0.570495		0.570495
CEFQDAYVLLSEKK	60 kDa heat shock protein, mitochondrial	P10809	HSPD1	0.337252	-0.979492	-0.32112	0.148067
CEIDPMFQK	Condensin complex subunit 2	Q15003	NCAPH		0.720811	0.720811
CEMSEHPSQTVR	Leucine-rich repeat flightless-interacting protein 1	Q32MZ4	LRRFIP1	0.27824		0.27824
CENVQPSGSFK	Serine dehydratase-like	Q96GA7	SDSL		-0.554075	-0.554075
CESAFLSK	60S ribosomal protein L24	P83731	RPL24	0.077616	-0.203108	-0.062746	0.135265
CESAPGCGVWQRPVIDNPNYK	Calnexin	P27824	CANX	-0.963038	-0.507441	-0.735239	0.718348
CEVLQYSAR	NADH dehydrogenase [ubiquinone] 1 alpha subcomplex subunit 10, mitochondrial	O95299	NDUFA10		4.90663	4.90663
CEVNGAGAHPLFAFLR	Glutathione peroxidase 1	P07203	GPX1		0.275672	0.275672
CEWLLR	Fat storage-inducing transmembrane protein 2	Q8N6M3	FITM2	0.66639	0.222908	0.444649	0.530917
CFAGLLNK	MMS19 nucleotide excision repair protein homolog	Q96T76	MMS19	1.03496		1.03496
CFFDIAINNQPAGR	Peptidyl-prolyl cis-trans isomerase G	Q13427	PPIG		-1.11065	-1.11065
CFGETLSTLNFAQR	Kinesin-like protein KIF15	Q9NS87	KIF15		0.47247	0.47247
CFHQLMK	Thymidylate kinase	P23919	DTYMK	1.02761	-0.945146	0.041234	0.0117075
CFIVGADNVGSK	60S acidic ribosomal protein P0	P05388	RPLP0	-0.638533		-0.638533
CFQETIGSQCGK	Latent-transforming growth factor beta-binding protein 1	Q14766	LTBP1		0.145679	0.145679
CGAALAGHQLIR	DNA-dependent protein kinase catalytic subunit	P78527	PRKDC	-2.24965		-2.24965
CGADWEEYIK	Damage-control phosphatase ARMT1	Q9H993	ARMT1	0.920558		0.920558
CGAETQHEGLELR	Prolactin regulatory element-binding protein	Q9HCU5	PREB	0.865268	3.03805	1.95166	0.490312
CGDLVFAK	Hepatoma-derived growth factor	P51858	HDGF	0.511248	-0.834557	-0.161655	0.0706292
CGEDDETIPSEYR	Calpastatin	P20810	CAST	-0.605561	0.0791905	-0.263185	0.234494
CGEMAQAASAAVTR	Valine--tRNA ligase	P26640	VARS1	-0.395775		-0.395775
CGESGHLAR	Cellular nucleic acid-binding protein	P62633	CNBP		-0.0628608	-0.0628608
CGFCHVGEEENEAR	PHD finger protein 6	Q8IWS0	PHF6	0.224223	2.39964	1.31193	0.35587
CGFLPGNEK	Proteasome activator complex subunit 2	Q9UL46	PSME2	0.160776	0.213915	0.187346	1.04727
CGGIDKR	Elongation factor 1-alpha 1	P68104	EEF1A1	0.0106452	0.401185	0.205915	0.315953
CGHTNNLRPK	Ubiquitin-60S ribosomal protein L40	P62987	UBA52		0.184973	0.184973
CGIPEALVQR	SAM and SH3 domain-containing protein 1	O94885	SASH1	0.600998	-0.287277	0.156861	0.105759
CGNPDVANYNFFPR	72 kDa type IV collagenase	P08253	MMP2	1.36817		1.36817
CGNQAAIMELDDTLK	Serine/threonine-protein phosphatase 2A catalytic subunit beta isoform	P62714	PPP2CB	0.251474	0.315022	0.283248	1.14803
CGSGPVHISGQHLVAVEEDAESEDEEEEDVK	Nucleophosmin	P06748	NPM1		2.31619	2.31619
CGSKDNIK	Microtubule-associated protein 4	P27816	MAP4	0.304029	0.372253	0.338141	1.19378
CGSSEDLHDSVR	Hepatoma-derived growth factor-related protein 2	Q7Z4V5	HDGFL2		-0.275259	-0.275259
CGSVLVR	40S ribosomal protein S2	P15880	RPS2	0.0170272	0.0265294	0.0217783	0.864104
CGVISPR	40S ribosomal protein S15a	P62244	RPS15A	-0.0481253	-0.0429424	-0.0455338	1.44139
CGVTSVPDIR	Integrin-linked kinase-associated serine/threonine phosphatase 2C	Q9H0C8	ILKAP	1.03702	0.285586	0.661304	0.482908
CHQPLAR	Zyxin	Q15942	ZYX		-0.338514	-0.338514
CHSGECITLDK	Low-density lipoprotein receptor	P01130	LDLR		-0.15894	-0.15894
CHTIMNCTR	Succinate dehydrogenase [ubiquinone] iron-sulfur subunit, mitochondrial	P21912	SDHB	0.260323	0.381841	0.321082	0.924231
CHTPPLYR	60S ribosomal protein L18a	Q02543	RPL18A	0.21298	0.0821719	0.147576	0.575802
CHVPLAQAQALVTSELEK	Protein FAM136A	Q96C01	FAM136A		0.394924	0.394924
CIANGVTSK	Stanniocalcin-1	P52823	STC1	0.933872	0.475714	0.704793	0.698832
CIELCCGSVK	Sodium/potassium-transporting ATPase subunit alpha-1	P05023	ATP1A1	0.93127		0.93127
CIENQVLQLER	Glutamine-dependent NAD(+) synthetase	Q6IA69	NADSYN1	1.7141		1.7141
CILAGDPAVGK	Intraflagellar transport protein 27 homolog	Q9BW83	IFT27	-0.211858	-0.491921	-0.351889	0.617789
CILRFPEILQK	Arginine--tRNA ligase, cytoplasmic	P54136	RARS1		1.09763	1.09763
CIPALDSLTPANEDQK	60 kDa heat shock protein, mitochondrial	P10809	HSPD1	-0.132103	-0.0517916	-0.0919475	0.581475
CIPGIFR	Prolow-density lipoprotein receptor-related protein 1	Q07954	LRP1	0.900679	-0.1871	0.35679	0.200389
CIPLWVGAR	Transmembrane protein 147	Q9BVK8	TMEM147	0.316658		0.316658
CITAMAK	Paxillin	P49023	PXN		0.30868	0.30868
CKEIAEELFTR	AMP deaminase 2	Q01433	AMPD2		-0.021102	-0.021102
CKELGITALHIK	40S ribosomal protein S14	P62263	RPS14	-0.224334	-0.0885218	-0.156428	0.583806
CKHFELGGDK	60S ribosomal protein L36a	P83881	RPL36A	1.68363	2.44726	2.06545	0.934157
CKPVPLLELAEGQK	Protein NEDD1	Q8NHV4	NEDD1		0.546777	0.546777
CLADAVVK	MIC	Q5TGZ0	MICOS10	0.816715	0.911859	0.864287	1.45587
CLAPGGGR	Rho guanine nucleotide exchange factor 40	Q8TER5	ARHGEF40		2.72018	2.72018
CLCVEGYAPR	Prolow-density lipoprotein receptor-related protein 1	Q07954	LRP1		0.676933	0.676933
CLEEGKLVNK	NADH dehydrogenase [ubiquinone] 1 alpha subcomplex subunit 8	P51970	NDUFA8	0.158668	0.29955	0.229109	0.721491
CLEGACVVNK	Prolow-density lipoprotein receptor-related protein 1	Q07954	LRP1	0.41818	0.717293	0.567736	0.785217
CLEPTVALLR	Protein CIP2A	Q8TCG1	CIP2A	0.819586		0.819586
CLGIPTR	Protein-glutamine gamma-glutamyltransferase 2	P21980	TGM2	0.142623	-0.321526	-0.0894514	0.11589
CLHDIALAHR	Proline-rich AKT1 substrate 1	Q96B36	AKT1S1		-3.02996	-3.02996
CLKNEYVENR	COX assembly mitochondrial protein 2 homolog	Q9NRP2	CMC2	0.0472794	0.41718	0.23223	0.368396
CLLIHPNPESALNEEAGR	Ubiquitin-conjugating enzyme E2 S	Q16763	UBE2S		2.31237	2.31237
CLLQIQASSGESK	Mitochondrial carnitine/acylcarnitine carrier protein	O43772	SLC25A20		2.07343	2.07343
CLMDQATDPNILGR	DNA-dependent protein kinase catalytic subunit	P78527	PRKDC	-1.34124	-1.17088	-1.25606	1.36544
CLNNLAASQLK	Peptidyl-prolyl cis-trans isomerase FKBP8	Q14318	FKBP8	-0.258622	0.248407	-0.00510729	0.00560523
CLPGFLGDR	Prolow-density lipoprotein receptor-related protein 1	Q07954	LRP1	0.0887819	0.181902	0.135342	0.675852
CLPPPSIR	Serine palmitoyltransferase 1	O15269	SPTLC1	0.0623703	0.730761	0.396565	0.350864
CLPSNEDKEEFPLCALAR	F-box only protein 17	Q96EF6	FBXO17	-1.43188		-1.43188
CLPTPK	60S ribosomal protein L18a	Q02543	RPL18A	-0.0326148	-0.0115787	-0.0220968	0.54848
CLSHHVADAYTSSQK	Torsin-1A-interacting protein 2	Q8NFQ8	TOR1AIP2	1.79273		1.79273
CLSSSLR	Prolow-density lipoprotein receptor-related protein 1	Q07954	LRP1	1.09087		1.09087
CLSVMEAK	Alanine--tRNA ligase, cytoplasmic	P49588	AARS1		-0.0661785	-0.0661785
CLVPEVTFR	Enhancer of mRNA-decapping protein 3	Q96F86	EDC3	1.94979		1.94979
CLVVDEADR	ATP-dependent RNA helicase DDX24	Q9GZR7	DDX24		2.17055	2.17055
CMPTFQFFK	Thioredoxin	P10599	TXN	-1.60691		-1.60691
CMPTFQFFKK	Thioredoxin	P10599	TXN	-0.489788	-0.0628769	-0.276332	0.378078
CNAEEHVR	Lysosome-associated membrane glycoprotein 1	P11279	LAMP1	0.0826847	-0.762994	-0.340154	0.2451
CNAVINEDPNAK	Kinesin-like protein KIF1B	O60333	KIF1B	-0.175617		-0.175617
CNEEHPAYLASDEITTVR	Dynamin-like 120 kDa protein, mitochondrial	O60313	OPA1	-1.47125		-1.47125
CNEGPILELENLPQNGR	Urokinase plasminogen activator surface receptor	Q03405	PLAUR		0.603952	0.603952
CNFYDNKDLECVTNLQEVAR	Lysosomal protective protein	P10619	CTSA	0.403244	-0.0829122	0.160166	0.201282
CNPVQR	Cyclin-dependent-like kinase 5	Q00535	CDK5		0.0878539	0.0878539
CNTNTAIELK	Histone acetyltransferase type B catalytic subunit	O14929	HAT1	0.209881		0.209881
CNTPTYCDLGK	Voltage-dependent anion-selective channel protein 3	Q9Y277	VDAC3	0.703433	0.186759	0.445096	0.475226
CNYSQSER	Zinc finger CCCH-type antiviral protein 1	Q7Z2W4	ZC3HAV1	-0.108137		-0.108137
CPASEPGLDATTASESR	Inverted formin-2	Q27J81	INF2	-0.804645	-1.38799	-1.09632	0.781107
CPENAFFLDHVR	Unconventional myosin-Ic	O00159	MYO1C	0.413098		0.413098
CPFTGNVSIR	40S ribosomal protein S11	P62280	RPS11	-0.196452	0.335649	0.0695984	0.0772167
CPGESSHICDFIR	Palmitoyl-protein thioesterase 1	P50897	PPT1		-0.97269	-0.97269
CPICVPCGLR	Exportin-5	Q9HAV4	XPO5	1.62869		1.62869
CPLNYFACPSGR	Prolow-density lipoprotein receptor-related protein 1	Q07954	LRP1	-0.331765	0.716238	0.192236	0.110052
CPYSQEAMQR	tRNA-specific adenosine deaminase 1	Q9BUB4	ADAT1		0.667836	0.667836
CQEAVR	Inosine triphosphate pyrophosphatase	Q9BY32	ITPA		0.583263	0.583263
CQEAWALER	Rho family-interacting cell polarization regulator 1	Q6ZS17	RIPOR1	-0.238635		-0.238635
CQGSGDDNLTSLGTLNFPGR	Glucocorticoid receptor	P04150	NR3C1		-0.641187	-0.641187
CQNALQQVTAR	Glutamine--fructose-6-phosphate aminotransferase [isomerizing] 2	O94808	GFPT2	0.679896	0.446723	0.563309	0.886307
CQNALQQVVAR	Glutamine--fructose-6-phosphate aminotransferase [isomerizing] 1	Q06210	GFPT1		1.06479	1.06479
CQNEQLQTAVTQQVSQIQQHK	General vesicular transport factor p115	O60763	USO1	0.242937	0.97941	0.611173	0.461911
CQPNEHNCLGTELCVPMSR	Prolow-density lipoprotein receptor-related protein 1	Q07954	LRP1		0.107872	0.107872
CQQEGQELLR	TRIO and F-actin-binding protein	Q9H2D6	TRIOBP	-0.587482	0.553946	-0.016768	0.00819775
CQQLQQEYSR	CDK5 regulatory subunit-associated protein 3	Q96JB5	CDK5RAP3	0.87713	0.463834	0.670482	0.720492
CQQPIGTK	Four and a half LIM domains protein 2	Q14192	FHL2	-0.658955	-0.667361	-0.663158	2.3942
CQQVLEPPYDEMFAAHLR	PCI domain-containing protein 2	Q5JVF3	PCID2		0.546466	0.546466
CQSSCGQVK	Neurogenic locus notch homolog protein 2	Q04721	NOTCH2		2.7914	2.7914
CQTGCWSPDGSR	Aladin	Q9NRG9	AAAS	1.40845	1.8008	1.60463	1.11099
CQTSMDELLK	STE20/SPS1-related proline-alanine-rich protein kinase	Q9UEW8	STK39	1.34842	0.978648	1.16354	0.998606
CQVFEETQIGGER	T-complex protein 1 subunit eta	Q99832	CCT7	-0.179144	-0.834513	-0.506829	0.437254
CSAALASR	Vitamin K epoxide reductase complex subunit 1-like protein 1	Q8N0U8	VKORC1L1	1.28042	5.25538	3.2679	0.458598
CSALATQYMHCVNHAK	MIC	Q9NX63	CHCHD3	-0.300769		-0.300769
CSASCCEDSQASMK	Protein FAM136A	Q96C01	FAM136A	0.658105	1.92978	1.29394	0.536451
CSCPLGYTGK	Neurogenic locus notch homolog protein 2	Q04721	NOTCH2	0.318354		0.318354
CSDAAGYPHATHDLEGPPLDAYSIQGQHTISPLDLAK	Poly(rC)-binding protein 1	Q15365	PCBP1		1.37336	1.37336
CSDNTEVEVSNLENKQPVESTSAK	Anillin	Q9NQW6	ANLN	-0.543935		-0.543935
CSEQVQDFTK	COX assembly mitochondrial protein homolog	Q7Z7K0	CMC1	0.413366	0.052839	0.233103	0.377721
CSFPVK	Protein numb homolog	P49757	NUMB	0.360866		0.360866
CSGDGVGAPR	Protein phosphatase 1G	O15355	PPM1G	0.611315	0.165571	0.388443	0.479366
CSHLLVK	Peptidyl-prolyl cis-trans isomerase NIMA-interacting 1	Q13526	PIN1	-0.381065	-0.198132	-0.289598	0.710506
CSHSLN	Survival motor neuron protein	Q16637	SMN1		1.85921	1.85921
CSICATTLR	[F-actin]-monooxygenase MICAL2	O94851	MICAL2	4.58518		4.58518
CSILAAANPAYGR	DNA replication licensing factor MCM7	P33993	MCM7	1.27648	0.42163	0.849056	0.527385
CSKEVATAIR	40S ribosomal protein S2	P15880	RPS2	-0.0599422	0.45137	0.195714	0.233549
CSKICEPGYSPTYK	Cathepsin B	P07858	CTSB	0.431208	0.222778	0.326993	0.706821
CSKICEPGYSPTYKQDK	Cathepsin B	P07858	CTSB	-0.0390185	-0.339472	-0.189245	0.369422
CSLAPLKEELR	RNA N6-adenosine-methyltransferase METTL16	Q86W50	METTL16	0.837409		0.837409
CSLPAEEDSVLEK	Microtubule-associated protein 4	P27816	MAP4	-0.455905	-0.0231903	-0.239548	0.330083
CSLQAAAILDANDAHQTETSSSQVK	Signal recognition particle subunit SRP68	Q9UHB9	SRP68	0.577132	1.1117	0.844417	0.709612
CSLSLVGR	Four and a half LIM domains protein 2	Q14192	FHL2	0.239207	0.311701	0.275454	1.07938
CSPIGVYTSGK	DNA replication licensing factor MCM5	P33992	MCM5		-0.0700831	-0.0700831
CSPSESPLMEK	Sodium-dependent phosphate transporter 1	Q8WUM9	SLC20A1		-0.731138	-0.731138
CSQAVYAAEK	Cysteine and glycine-rich protein 1	P21291	CSRP1	0.129425	-0.659936	-0.265255	0.205312
CSSTLLPGAYENGPEEGTFVCAEHCAR	MICAL-like protein 1	Q8N3F8	MICALL1		1.29947	1.29947
CSTFQR	Stanniocalcin-1	P52823	STC1	0.788484	0.288416	0.53845	0.5579
CSTPEEIK	Destrin	P60981	DSTN	-0.276599	-0.199701	-0.23815	0.991814
CSTPEEIKK	Destrin	P60981	DSTN	-0.360431	-0.481231	-0.420831	1.04215
CSTPEEIKKR	Destrin	P60981	DSTN		0.0567602	0.0567602
CSTVVCVICLEKPK	Zinc finger HIT domain-containing protein 3	Q15649	ZNHIT3		0.670818	0.670818
CSVCGGAIMPEPGQEETVR	Thyroid receptor-interacting protein 6	Q15654	TRIP6	1.62631	-1.37038	0.127964	0.0242182
CSVCPDYDLCSVCEGK	Sequestosome-1	Q13501	SQSTM1	0.205461	0.924093	0.564777	0.442828
CSVLAAANSVFGR	DNA replication licensing factor MCM5	P33992	MCM5		-0.688609	-0.688609
CSVSAVNLPK	MAP7 domain-containing protein 1	Q3KQU3	MAP7D1	0.959972	0.804404	0.882188	1.25191
CSWLVPSPK	Inactive hydroxysteroid dehydrogenase-like protein 1	Q3SXM5	HSDL1	0.716066	1.00297	0.859518	0.977651
CTAYFEGSR	Prolow-density lipoprotein receptor-related protein 1	Q07954	LRP1	0.308836	0.404646	0.356741	1.07068
CTDDFNGAQCK	26S proteasome regulatory subunit 6A	P17980	PSMC3		0.0639725	0.0639725
CTFTSPK	Protein wntless homolog	Q5T9L3	WLS	0.203345	0.822235	0.51279	0.461356
CTGGEVGATSALAPK	60S ribosomal protein L12	P30050	RPL12		0.0696492	0.0696492
CTHWAEGGK	C-1-tetrahydrofolate synthase, cytoplasmic	P11586	MTHFD1	0.960814	4.75873	2.85977	0.428096
CTLPEHESPSQDISDACEAESTER	Leucine-rich repeat flightless-interacting protein 1	Q32MZ4	LRRFIP1	0.284881	-1.13254	-0.423831	0.182513
CTLSDDCIPLTWR	CD320 antigen	Q9NPF0	CD320		1.51148	1.51148
CTNCAR	40S ribosomal protein S26	P62854	RPS26	0.530169		0.530169
CTPSVISFGSK	Heat shock protein 105 kDa	Q92598	HSPH1	-4.60065		-4.60065
CVAEALLCNGQDDCGDSSDER	Prolow-density lipoprotein receptor-related protein 1	Q07954	LRP1		0.764589	0.764589
CVANNQVETLEK	Leucine-rich PPR motif-containing protein, mitochondrial	P42704	LRPPRC	-0.719315		-0.719315
CVDFQTLK	DNA replication licensing factor MCM5	P33992	MCM5	-0.474507	-0.364164	-0.419335	1.07945
CVDKSWIPEGVVR	Ras-related protein Rab-27A	P51159	RAB27A	2.52505	2.7656	2.64533	1.53872
CVEENNGVAK	Neutral amino acid transporter B(0)	Q15758	SLC1A5	-2.67		-2.67
CVGAELGLDCPGRDYPNICAGTDR	Uridine phosphorylase 1	Q16831	UPP1	-0.0124036	0.347025	0.167311	0.28171
CVICGGPGVSDAYYCK	PHD finger-like domain-containing protein 5A	Q7RTV0	PHF5A	2.31237	0.971944	1.64216	0.607853
CVLPEEDSGELAKPK	Serine-threonine kinase receptor-associated protein	Q9Y3F4	STRAP	-1.27097	-0.128587	-0.699781	0.360703
CVLPHMIER	Dehydrogenase/reductase SDR family member 7	Q9Y394	DHRS7	0.774147	0.601734	0.687941	1.10039
CVSSPHFQVAER	Serine/threonine-protein phosphatase 2A 56 kDa regulatory subunit epsilon isoform	Q16537	PPP2R5E		1.31999	1.31999
CVSWMCTR	WD repeat and FYVE domain-containing protein 1	Q8IWB7	WDFY1	1.73616		1.73616
CVVVGDGAVGK	Ras-related C3 botulinum toxin substrate 2	P15153	RAC2	-0.00940978	0.239978	0.115284	0.279882
CWEVQDSGQTIPK	mRNA export factor	P78406	RAE1	3.77653		3.77653
CYEMASHLR	Profilin-1	P07737	PFN1		-1.38665	-1.38665
DACLNAR	Sarcoplasmic/endoplasmic reticulum calcium ATPase 2	P16615	ATP2A2	0.855539	0.620689	0.738114	0.998107
DACVISSDFHER	Transmembrane 9 superfamily member 2	Q99805	TM9SF2	-0.154576		-0.154576
DAGGKSWCPDCVQAEPVVR	Thioredoxin domain-containing protein 17	Q9BRA2	TXNDC17	-0.565736	0.491973	-0.0368815	0.0196898
DAWASPCHSYPLVATR	Beta-2-syntrophin	Q13425	SNTB2	-0.593312		-0.593312
DCGGAAQLAGPAAEADPLGR	E3 ubiquitin-protein ligase RNF114	Q9Y508	RNF114	-0.0986218	-0.1731	-0.135861	0.768751
DCHEEVYAGSHQYPGR	Golgi resident protein GCP60	Q9H3P7	ACBD3	-0.671677	0.903051	0.115687	0.0423324
DCLIPMGITSENVAER	3-ketoacyl-CoA thiolase, peroxisomal	P09110	ACAA1		-2.53701	-2.53701
DCLTQACSALTGK	ADP-ribosylation factor-related protein 1	Q13795	ARFRP1	-0.0169169		-0.0169169
DCPDGSDEAPEICPQSK	Prolow-density lipoprotein receptor-related protein 1	Q07954	LRP1	-0.0145411	-0.190199	-0.10237	0.345416
DCSIALPYVCK	C-type mannose receptor 2	Q9UBG0	MRC2	2.62265		2.62265
DCTVEMPILK	C-terminal-binding protein 2	P56545	CTBP2	-0.0380808		-0.0380808
DDDIAALVVDNGSGMCK	Actin, cytoplasmic 1	P60709	ACTB		1.01603	1.01603
DDILCPDCGKDI	Four and a half LIM domains protein 2	Q14192	FHL2	0.361469		0.361469
DEFTNTCPSDKEVEIAYSDVAK	Chloride intracellular channel protein 4	Q9Y696	CLIC4	-1.58213	-0.265671	-0.923899	0.404408
DEGLCSANVTR	Tissue factor pathway inhibitor 2	P48307	TFPI2	0.0457878	0.458308	0.252048	0.359908
DFGYGVEEEEEEAAAAGGGVGAGAGGGCGPGGADSSKPR	Ras-related GTP-binding protein C	Q9HB90	RRAGC		-0.725845	-0.725845
DFTPVCTTELGR	Peroxiredoxin-6	P30041	PRDX6	-0.049972	0.348358	0.149193	0.22863
DGASCAELVSFK	PCI domain-containing protein 2	Q5JVF3	PCID2	2.20479	0.570981	1.38789	0.470214
DGGVQACFSR	Guanine nucleotide-binding protein G(i) subunit alpha	P08754	GNAI3	0.743128	0.115522	0.429325	0.395968
DGMMQKPGSNAPVGGNVTSNFSGDDLECR	Cancer/testis antigen family 45 member A10	P0DMU9	CT45A10	-0.599646	2.70223	1.05129	0.194487
DGQAVLENVSEGGKELPGCLGR	N-acylglucosamine 2-epimerase	P51606	RENBP	1.37018		1.37018
DGQPCMDHDRQTGEGVGPQEYTLLK	Leucine--tRNA ligase, cytoplasmic	Q9P2J5	LARS1	-1.10105		-1.10105
DGVPYCESDYHAQFGIK	Actin-binding LIM protein 3	O94929	ABLIM3	-0.547797		-0.547797
DHHTADLCR	Protein-glutamine gamma-glutamyltransferase 2	P21980	TGM2		0.454816	0.454816
DHRPPCAQEAPR	Sequestosome-1	Q13501	SQSTM1	0.617329	0.346962	0.482145	0.759385
DHVPPVSLVCQNIPR	Large subunit GTPase 1 homolog	Q9H089	LSG1	-1.30856		-1.30856
DICVIQVPPEMR	Mitochondrial assembly of ribosomal large subunit protein 1	Q96EH3	MALSU1		1.65176	1.65176
DIICQIAYAR	60S ribosomal protein L5	P46777	RPL5	1.79865	0.862915	1.33078	0.667107
DIKWDFTPCK	V-type proton ATPase catalytic subunit A	P38606	ATP6V1A	0.324255		0.324255
DIRPVCR	ATP-dependent RNA helicase DDX39A	O00148	DDX39A		0.542571	0.542571
DKEEEEEVAGGDCIGSTVYSK	Protein SAAL1	Q96ER3	SAAL1	0.416169		0.416169
DKLPQPVQPDPVSHCK	Integrin beta-1	P05556	ITGB1	-0.90393		-0.90393
DKMCSMVK	40S ribosomal protein S3a	P61247	RPS3A	0.0421942	0.33935	0.190772	0.375462
DLAGCIHGLSNVK	Isocitrate dehydrogenase [NADP], mitochondrial	P48735	IDH2	0.268385		0.268385
DLCNTHLMR	DNA-dependent protein kinase catalytic subunit	P78527	PRKDC	1.56451		1.56451
DLCQLLVYK	Growth factor receptor-bound protein 10	Q13322	GRB10		0.541235	0.541235
DLDQCRDGK	Protein S100-A10	P60903	S100A10	-0.555758	-0.224928	-0.390343	0.593162
DLKPSNLLVNENCELK	Mitogen-activated protein kinase 7	Q13164	MAPK7		0.35329	0.35329
DLQPFPTCQALVYR	Ribosome biogenesis protein BOP1	Q14137	BOP1		-0.170436	-0.170436
DLSHIGDAVVISCAK	Proliferating cell nuclear antigen	P12004	PCNA	-0.449999	-3.19374	-1.82187	0.386278
DLSYCLSGMYDHR	Heterogeneous nuclear ribonucleoprotein F	P52597	HNRNPF	0.404084	0.0743947	0.23924	0.415565
DLTTAGAVTQCYR	60S ribosomal protein L18a	Q02543	RPL18A	0.0150393	0.0127727	0.013906	1.28593
DNQNFCVPCYEK	Four and a half LIM domains protein 2	Q14192	FHL2	-0.2049	0.0127219	-0.0960891	0.268028
DNTNEIYSGKFCECDNFNCDR	Integrin beta-1	P05556	ITGB1	1.38532		1.38532
DNVCYSR	39S ribosomal protein S18a, mitochondrial	Q9NVS2	MRPS18A	0.842445	0.636287	0.739366	1.0546
DNWVFCGGK	Protein FAM3C	Q92520	FAM3C	0.493947		0.493947
DPSQIDNNEPYMKIPCNDSK	Eukaryotic translation initiation factor 3 subunit I	Q13347	EIF3I	1.30038		1.30038
DQDGCLPEEVTGCK	Acyl-CoA-binding domain-containing protein 6	Q9BR61	ACBD6		1.62147	1.62147
DRVLAELPQCLRK	Ras-related protein Rab-34	Q9BZG1	RAB34	0.455963	0.416582	0.436273	1.54192
DSDDVPMVLVGNKCDLPTR	GTPase NRas	P01111	NRAS	0.701314		0.701314
DSGAASEQATAAPNPCSSSSR	Lipase maturation factor 2	Q9BU23	LMF2	1.81658	1.3626	1.58959	1.04432
DSGACFSASEPDAVHVVLDR	Glutamine amidotransferase-like class 1 domain-containing protein 1	Q8NB37	GATD1	-0.188966	-0.280613	-0.23479	0.911136
DSGGREDLVYNIICK	Ephrin type-B receptor 2	P29323	EPHB2	1.20938	2.24241	1.72589	0.732538
DSLYVDGDCTMDIR	Profilin-2	P35080	PFN2	-0.74851	-0.249451	-0.498981	0.529873
DSNNLCLHFNPR	Galectin-1	P09382	LGALS1	-0.671189	-0.517897	-0.594543	1.0882
DSPQSLTDESCSEK	Melanophilin	Q9BV36	MLPH	1.53834	0.0417415	0.790041	0.316296
DTQSPSTCSEGLLGWSQK	182 kDa tankyrase-1-binding protein	Q9C0C2	TNKS1BP1	-1.68359		-1.68359
DTSFTVCPDVPR	M-phase inducer phosphatase 3	P30307	CDC25C		-1.50049	-1.50049
DVCTFLR	Cytochrome c1, heme protein, mitochondrial	P08574	CYC1	0.255652	0.63712	0.446386	0.589949
DVQIGDIVTVGECRPLSK	40S ribosomal protein S11	P62280	RPS11	0.389429	0.638386	0.513908	0.820195
DVVICPDASLEDAKK	Protein/nucleic acid deglycase DJ-1	Q99497	PARK7		0.0732726	0.0732726
DWDSPYSHDLDTSADSVGNACR	5'-3' exonuclease PLD3	Q8IV08	PLD3		0.74177	0.74177
DWSDEPIKECGTNECLDNNGGCSHVCNDLK	Low-density lipoprotein receptor	P01130	LDLR	2.51582		2.51582
EACWTISNITAGNR	Importin subunit alpha-7	O60684	KPNA6	-0.80534	1.291	0.242832	0.0679983
EADASPASAGICR	Nuclear pore complex protein Nup85	Q9BW27	NUP85	2.2463		2.2463
EADTDVQVCPNYSIPQKTDSYFNPK	TRMT1-like protein	Q7Z2T5	TRMT1L	-0.650948		-0.650948
EAELSKGESVCLDR	Mitochondrial import inner membrane translocase subunit Tim10	P62072	TIMM10		-0.109851	-0.109851
EAEPHPLWEYPCR	Protein arginine N-methyltransferase 7	Q9NVM4	PRMT7	0.104292		0.104292
EAIEGTYIDKKCPFTGNVSIR	40S ribosomal protein S11	P62280	RPS11	0.383314	0.463902	0.423608	1.21915
EALCDPTVASR	Protein pelota homolog	Q9BRX2	PELO		-1.6894	-1.6894
EASSSACDLPR	2-aminoethanethiol dioxygenase	Q96SZ5	ADO	-2.14918	0.201541	-0.973821	0.25218
EAVCFIPGEGHTLQEHQIVLVEGGR	28S ribosomal protein S12, mitochondrial	O15235	MRPS12	1.87223		1.87223
ECADLWPR	60S ribosomal protein L23	P62829	RPL23	0.120457	0.182863	0.15166	0.888817
ECFVCTACR	Four and a half LIM domains protein 2	Q14192	FHL2	-0.195338	0.138515	-0.0284113	0.049307
ECGNAHYQR	Peptidyl-prolyl cis-trans isomerase FKBP8	Q14318	FKBP8	-0.841271		-0.841271
ECPSDECGAGVFMASHFDR	Ubiquitin-40S ribosomal protein S27a	P62979	RPS27A	0.275728	0.954529	0.615129	0.493525
ECQEESFWK	OCIA domain-containing protein 2	Q56VL3	OCIAD2	-0.0101683	0.0234512	0.00664144	0.118925
ECQEESFWKR	OCIA domain-containing protein 2	Q56VL3	OCIAD2	0.476189	0.469157	0.472673	2.32463
EDQLLCTDCYSNEYSSK	Four and a half LIM domains protein 2	Q14192	FHL2		-0.55355	-0.55355
EECPVFTPPGGETLDQVK	Fructose-2,6-bisphosphatase TIGAR	Q9NQ88	TIGAR		2.0372	2.0372
EEEIAALVIDNGSGMCK	Actin, cytoplasmic 2	P63261	ACTG1	0.307939		0.307939
EFCQQEVEPMCK	Ubiquitin thioesterase OTUB1	Q96FW1	OTUB1	1.80274	1.42456	1.61365	1.12923
EFMLCR	NADH dehydrogenase [ubiquinone] 1 alpha subcomplex subunit 8	P51970	NDUFA8	0.451508	0.438853	0.44518	2.04348
EGAKLECGGSAMEDK	Aldehyde dehydrogenase family 1 member A3	P47895	ALDH1A3		1.47959	1.47959
EGALCEENMR	Elongation factor 2	P13639	EEF2	-2.30829	0.135052	-1.08662	0.26986
EGELSTCGCSR	Protein Wnt-5a	P41221	WNT5A	0.818273	2.23526	1.52676	0.558156
EGGVIVDYHGCDFFPER	Adenylate kinase isoenzyme 6	Q9Y3D8	AK6	0.0946861	0.638604	0.366645	0.391163
EGICALGGTSELSSEGTQHSYSEEEK	Plastin-3	P13797	PLS3	-0.527056	1.00743	0.240188	0.0932035
EGPNKTGTSCALDCGAGIGR	N-terminal Xaa-Pro-Lys N-methyltransferase 1	Q9BV86	NTMT1	3.12809	2.49545	2.81177	1.1468
EGPTALQDSNSGEPDIPPPQPDCGDFR	Kanadaptin	Q9BWU0	SLC4A1AP		1.80909	1.80909
EGQECGVYTPNCAPGLQCHPPKDDEAPLR	Insulin-like growth factor-binding protein 6	P24592	IGFBP6	3.86676	-0.330125	1.76832	0.256318
EGQNYQQNCIKEVEQFTQVAK	NADH dehydrogenase [ubiquinone] 1 beta subcomplex subunit 10	O96000	NDUFB10	2.62885	0.503678	1.56626	0.420804
EGVECEVINMR	Pyruvate dehydrogenase E1 component subunit beta, mitochondrial	P11177	PDHB	-1.58937		-1.58937
EHGLNPDVVQNIQDICNSK	Zinc finger CCCH-type antiviral protein 1	Q7Z2W4	ZC3HAV1	0.496667	0.319073	0.40787	0.864967
EHGQCADVDECSLAEK	Protein disulfide isomerase CRELD2	Q6UXH1	CRELD2	1.58409	1.09247	1.33828	0.936883
EHGVGGVSQCPEPGLR	182 kDa tankyrase-1-binding protein	Q9C0C2	TNKS1BP1	0.521766	1.01256	0.767162	0.705332
EICLQSQSK	Anillin	Q9NQW6	ANLN	-1.37379	-0.173784	-0.773789	0.376861
EICNAYTELNDPMR	Lysine--tRNA ligase	Q15046	KARS1	0.138377	0.919962	0.52917	0.392594
EIDSVKYLECSALTQR	Ras-related C3 botulinum toxin substrate 2	P15153	RAC2	0.819985	1.06041	0.940199	1.09174
EIESTDTACIGPTLR	Exocyst complex component 6B	Q9Y2D4	EXOC6B		1.54588	1.54588
EILGTAQSVGCNVDGR	60S ribosomal protein L12	P30050	RPL12		-2.74066	-2.74066
EIRPQDCPISR	Putative tRNA (cytidine(32)/guanosine(34)-2'-O)-methyltransferase	Q9UET6	FTSJ1		-0.228538	-0.228538
EIVHIQAGQCGNQIGTK	Tubulin beta-6 chain	Q9BUF5	TUBB6	0.627277	0.139832	0.383554	0.443254
EIVHLQAGQCGNQIGAK	Tubulin beta-4B chain	P68371	TUBB4B	0.220208	0.23907	0.229639	1.58286
EIYTHFTCATDTK	Guanine nucleotide-binding protein G(i) subunit alpha-2	P04899	GNAI2	-0.464592	1.31819	0.426799	0.145256
EKECGVTATFDASR	Protein numb homolog	P49757	NUMB	0.251178	-0.663931	-0.206376	0.136528
EKLCFLDKVEPHATIAEIK	Very-long-chain enoyl-CoA reductase	Q9NZ01	TECR	0.485002	0.963416	0.724209	0.692304
EKLGCQDAFPEVYDK	Delta(24)-sterol reductase	Q15392	DHCR24	0.406693		0.406693
EKPFSNSKVECQAQAR	Nuclear autoantigen Sp-100	P23497	SP100	1.86843		1.86843
EKPSQGIYMVYCR	PHD finger protein 6	Q8IWS0	PHF6		-2.50483	-2.50483
ELADITLDPPPNCSAGPK	Ubiquitin-conjugating enzyme E2 E1	P51965	UBE2E1	-0.296576	-2.07619	-1.18639	0.387563
ELAGHTGYLSCCR	Guanine nucleotide-binding protein G(I)/G(S)/G(T) subunit beta-1	P62873	GNB1	-1.98218		-1.98218
ELANSPDCPQMCAYK	Phosphatidylinositol transfer protein beta isoform	P48739	PITPNB		0.946711	0.946711
ELAQQVQQVAAEYCR	Probable ATP-dependent RNA helicase DDX5	P17844	DDX5		-0.568545	-0.568545
ELCAQPGQVVAPGAVLVR	RNA polymerase II subunit A C-terminal domain phosphatase	Q9Y5B0	CTDP1	0.334374		0.334374
ELDQWVEQLNECK	Serine/threonine-protein phosphatase 2A catalytic subunit beta isoform	P62714	PPP2CB		2.33226	2.33226
ELEASEELDTICPK	Glutaredoxin-3	O76003	GLRX3	-0.19627	-0.119092	-0.157681	0.81589
ELGGCSQAGNR	Arf-GAP domain and FG repeat-containing protein 2	O95081	AGFG2		-0.436774	-0.436774
ELLSDTAHLNETHCAR	Melanophilin	Q9BV36	MLPH	0.161167		0.161167
ELPGHTGYLSCCR	Guanine nucleotide-binding protein G(I)/G(S)/G(T) subunit beta-2	P62879	GNB2	3.72782	0.0760155	1.90192	0.312453
ELSFSGIPCEGGLR	TBC1 domain family member 13	Q9NVG8	TBC1D13	-1.41886		-1.41886
EMASCITQR	Pre-rRNA-processing protein TSR2 homolog	Q969E8	TSR2		-2.94791	-2.94791
EMENFEAPFHCLAK	Intraflagellar transport protein 27 homolog	Q9BW83	IFT27	0.492845	0.430352	0.461599	1.36625
EMNPALGIDCLHK	T-complex protein 1 subunit epsilon	P48643	CCT5		-0.262186	-0.262186
EMPCPLPCDEESPEAELHNHGIQINSCSVR	Nuclear autoantigen Sp-100	P23497	SP100	1.14993	0.729186	0.939557	0.853162
ENPVINDCCR	TRPM8 channel-associated factor 1	Q9Y4C2	TCAF1	0.487691	-0.223203	0.132244	0.111681
ENVNATENCISAVGK	Importin-5	O00410	IPO5	1.09878	-1.31243	-0.106827	0.0251491
EPGLCTWQSLR	Metalloproteinase inhibitor 1	P01033	TIMP1	0.354539	1.09579	0.725165	0.521735
EPSVPASCAVSATYER	La-related protein 4B	Q92615	LARP4B	-1.26022	-0.310357	-0.785291	0.460575
EQCCYNCGKPGHLAR	Cellular nucleic acid-binding protein	P62633	CNBP	0.746381		0.746381
EQCEQLEK	Cytochrome b-c1 complex subunit 6, mitochondrial	P07919	UQCRH	-0.102752	0.189073	0.0431606	0.0878255
EQCGCR	UDP-glucose 4-epimerase	Q14376	GALE	-0.222761		-0.222761
EQPWHKECFVCTACR	Four and a half LIM domains protein 2	Q14192	FHL2	-1.31612		-1.31612
EQSQPCADNAVLSSGLTAAR	Casein kinase II subunit alpha'	P19784	CSNK2A2		0.512771	0.512771
EQVPSLGSNVACGLAYTDYHK	Acetolactate synthase-like protein	A1L0T0	ILVBL	-1.5894		-1.5894
EQWPQCPTIK	Cathepsin B	P07858	CTSB	0.296506	0.794474	0.54549	0.564476
ERLELCDER	Cytochrome b-c1 complex subunit 6, mitochondrial	P07919	UQCRH	-1.77981	-0.716736	-1.24827	0.591285
ERPTPSLNNNCTTSEDSLVLYNR	Bifunctional glutamate/proline--tRNA ligase	P07814	EPRS1		0.382923	0.382923
ESAQCVGDEFLNCK	Sorting nexin-8	Q9Y5X2	SNX8		1.16369	1.16369
ESGSLSPEHGPVVVHCSAGIGR	Tyrosine-protein phosphatase non-receptor type 1	P18031	PTPN1		0.626383	0.626383
ESSFEESNIEDPLIVTPDCQEK	Serine/threonine-protein kinase greatwall	Q96GX5	MASTL		0.77273	0.77273
ESTGNMVTGQTVCK	Condensin complex subunit 1	Q15021	NCAPD2	1.04351	1.20581	1.12466	1.33861
ETDCGVHINAGPEIGVASTK	Glutamine--fructose-6-phosphate aminotransferase [isomerizing] 2	O94808	GFPT2	0.723549	2.13265	1.4281	0.534958
ETHSVDRLPSALTATACK	La-related protein 4B	Q92615	LARP4B		0.579317	0.579317
ETTEAACR	Glutathione S-transferase kappa 1	Q9Y2Q3	GSTK1		0.594799	0.594799
EVAESCKDIK	Isocitrate dehydrogenase [NAD] subunit alpha, mitochondrial	P50213	IDH3A		0.736463	0.736463
EVEVIGGADKYHSVCR	Thymidine kinase, cytosolic	P04183	TK1	-0.956266		-0.956266
EVIAVSCGPAQCQETIR	Electron transfer flavoprotein subunit beta	P38117	ETFB	-0.479161	0.543852	0.0323457	0.017821
EVNVSPCPTQPCQLSK	NPC intracellular cholesterol transporter 2	P61916	NPC2	3.39178	1.06025	2.22602	0.512688
EVQCPEANIDTALCK	Protein AHNAK2	Q8IVF2	AHNAK2		-0.990188	-0.990188
EVSSLEGSPPPCLGQEEAVCTK	A-kinase anchor protein 12	Q02952	AKAP12		1.80707	1.80707
EVVESCR	UDP-glucose 6-dehydrogenase	O60701	UGDH	0.823031	0.397494	0.610262	0.670463
FAAAYCR	Pyruvate dehydrogenase E1 component subunit alpha, somatic form, mitochondrial	P08559	PDHA1	1.08952	0.91812	1.00382	1.26584
FACFER	Phosphate carrier protein, mitochondrial	Q00325	SLC25A3		0.543761	0.543761
FASGGCDNLIK	Protein SEC13 homolog	P55735	SEC13	-0.546815	-0.621747	-0.584281	1.3897
FATCNPSTR	Aldehyde dehydrogenase family 1 member A3	P47895	ALDH1A3	-0.146963	0.267396	0.0602167	0.0862245
FCAFGGNPPVTGPR	DNA-directed RNA polymerase I subunit RPA34	O15446	CD3EAP		0.230453	0.230453
FCAFVQEAESRPR	Rho guanine nucleotide exchange factor 1	Q92888	ARHGEF1		0.276271	0.276271
FCECDNFNCDR	Integrin beta-1	P05556	ITGB1	2.23533	0.920966	1.57815	0.599979
FCEMCCDCR	Serine/threonine-protein phosphatase 4 regulatory subunit 1	Q8TF05	PPP4R1	0.518127	2.43923	1.47868	0.435626
FCFWPDSPSPDR	Nuclear-interacting partner of ALK	Q86WB0	ZC3HC1		-0.0686257	-0.0686257
FCKDTFDKNYK	Ras-related protein Rab-34	Q9BZG1	RAB34	-1.78078		-1.78078
FCLGLLSNVNR	Mothers against decapentaplegic homolog 2	Q15796	SMAD2		-0.220955	-0.220955
FCLICNYLSK	Replication factor C subunit 5	P40937	RFC5		-0.892981	-0.892981
FCPFAER	Glutathione S-transferase omega-1	P78417	GSTO1	-1.1769	-1.15236	-1.16463	2.17352
FCSEAQFECQNHR	Prolow-density lipoprotein receptor-related protein 1	Q07954	LRP1	2.59969	1.29934	1.94951	0.688389
FCSFSPCIEQVQR	tRNA (adenine(58)-N(1))-methyltransferase catalytic subunit TRMT61A	Q96FX7	TRMT61A		0.819527	0.819527
FCSPGK	N-lysine methyltransferase SMYD2	Q9NRG4	SMYD2	-0.489724		-0.489724
FCVSCAR	DNA (cytosine-5)-methyltransferase 1	P26358	DNMT1		-1.04267	-1.04267
FCYGQCNSFYIPR	Gremlin-1	O60565	GREM1	-0.154103	0.823101	0.334499	0.209134
FDCHHCNESLFGK	Four and a half LIM domains protein 2	Q14192	FHL2	0.00191822	0.0480844	0.0250013	0.323657
FDNLYCCR	S-adenosylhomocysteine hydrolase-like protein 1	O43865	AHCYL1		-0.178925	-0.178925
FDTGNLCMVTGGANLGR	40S ribosomal protein S4, X isoform	P62701	RPS4X	-0.231019	0.294344	0.0316628	0.0345009
FEHCNFNDVTTR	CD59 glycoprotein	P13987	CD59		1.1131	1.1131
FELSCYSLAPQIK	Argininosuccinate synthase	P00966	ASS1		-0.755136	-0.755136
FENLCK	Heat shock protein HSP 90-beta	P08238	HSP90AB1	2.15842		2.15842
FFAPECGR	PDZ and LIM domain protein 5	Q96HC4	PDLIM5	-3.43789	-3.39418	-3.41604	2.39011
FFAPWCGHCK	Thioredoxin domain-containing protein 5	Q8NBS9	TXNDC5	-0.430516		-0.430516
FFGYCNDVDR	COX assembly mitochondrial protein 2 homolog	Q9NRP2	CMC2	0.00365962	0.179984	0.0918219	0.31242
FFSGGCHR	Tissue factor pathway inhibitor 2	P48307	TFPI2	0.241979	0.415811	0.328895	0.783892
FGCVVCR	Prostamide/prostaglandin F synthase	Q8TBF2	PRXL2B		-0.919582	-0.919582
FGDYQCNSAMGISQMLK	Arginine--tRNA ligase, cytoplasmic	P54136	RARS1		-0.0303203	-0.0303203
FICEQDHQNFLR	Heat shock protein 105 kDa	Q92598	HSPH1	-2.11337	-3.54805	-2.83071	0.801338
FICTTSAIQNR	ATP-citrate synthase	P53396	ACLY	-0.340389	0.146909	-0.09674	0.119538
FITVCDYTNPCTK	Myeloid differentiation primary response protein MyD88	Q99836	MYD88	0.452924		0.452924
FLMECR	Eukaryotic translation initiation factor 4E-binding protein 1	Q13541	EIF4EBP1	-0.266951		-0.266951
FLNIQCQLSR	3'-5' exoribonuclease 1	Q8IV48	ERI1	-0.632629		-0.632629
FLTFKDCDPGEVNK	39S ribosomal protein L39, mitochondrial	Q9NYK5	MRPL39	0.752622		0.752622
FNAHGDANTIVCNSK	Galectin-1	P09382	LGALS1	-0.843159	-0.484541	-0.66385	0.774829
FNAHGDANTIVCNSKDGGAWGTEQR	Galectin-1	P09382	LGALS1	-1.94329	-1.32866	-1.63597	0.92734
FNMANALASATCER	LIM and senescent cell antigen-like-containing domain protein 3	P0CW19	LIMS3	1.11187		1.11187
FNQSQLEAEENEQITIADNHYCSSGQGQGR	TBC1 domain family member 5	Q92609	TBC1D5	-0.131394	2.73082	1.29971	0.275227
FPDEATCMGFCAPK	Tissue factor pathway inhibitor 2	P48307	TFPI2	0.326515	1.98067	1.15359	0.402318
FPDLAAEKECR	Coiled-coil domain-containing protein 25	Q86WR0	CCDC25		0.714867	0.714867
FQGIKHECQANGPEDLNR	Destrin	P60981	DSTN	-0.191688	-0.373752	-0.28272	0.702659
FQGQTCEMCQTCLGVCAEHK	Integrin beta-1	P05556	ITGB1	1.37798	2.13342	1.7557	0.869969
FQGQTCEMCQTCLGVCAEHKECVQCR	Integrin beta-1	P05556	ITGB1	2.49988	1.73926	2.11957	0.946826
FQMTQEVVCDECPNVK	DnaJ homolog subfamily B member 11	Q9UBS4	DNAJB11	0.538228	1.88372	1.21097	0.491037
FQPASAPAEDCISSSTEPKPDPK	Cytoskeleton-associated protein 5	Q14008	CKAP5	-1.03334		-1.03334
FRLDCPLAMER	Vacuolar protein sorting-associated protein 28 homolog	Q9UK41	VPS28	-0.788019		-0.788019
FSAIQCAAAVPR	DNA polymerase delta subunit 3	Q15054	POLD3		1.93001	1.93001
FSCPETDSHR	Carnitine O-palmitoyltransferase 1, liver isoform	P50416	CPT1A	0.385951	1.60978	0.997865	0.45569
FSFCCSPEPEAEAEAAAGPGPCER	Sequestosome-1	Q13501	SQSTM1	-0.122525	-0.0127533	-0.067639	0.362537
FSFQCPGR	Integrin-linked protein kinase	Q13418	ILK	0.992594	-0.0285444	0.482025	0.285417
FSKPPEDDDANSYENVLICK	Linker for activation of T-cells family member 2	Q9GZY6	LAT2		4.76749	4.76749
FSPNSSNPIIVSCGWDK	Receptor of activated protein C kinase 1	P63244	RACK1	0.0756501	0.466406	0.271028	0.400517
FSPNSSNPIIVSCGWDKLVK	Receptor of activated protein C kinase 1	P63244	RACK1		-0.492322	-0.492322
FTCACPDGMLLAR	Low-density lipoprotein receptor	P01130	LDLR	0.569901	1.0263	0.7981	0.7513
FTCEMFHPNIYPDGR	Ubiquitin-conjugating enzyme E2 G2	P60604	UBE2G2	0.00673235	1.43395	0.720341	0.303634
FTCEQALQHPWIAGDTALDK	Calcium/calmodulin-dependent protein kinase type 1	Q14012	CAMK1	0.853112	0.527372	0.690242	0.831153
FTDFQPFCCSESGPR	Serine/threonine-protein phosphatase 6 regulatory subunit 2	O75170	PPP6R2		0.839176	0.839176
FTHCEQVLGEGALDR	E3 ubiquitin-protein ligase TRIM47	Q96LD4	TRIM47		0.804445	0.804445
FTYCSQVLGLHCYK	E3 ubiquitin/ISG15 ligase TRIM25	Q14258	TRIM25	-0.963682		-0.963682
FVASCGFTPDVK	Transducin beta-like protein 2	Q9Y4P3	TBL2	-0.362235		-0.362235
FVYTPAMESVCGYFHR	Metalloproteinase inhibitor 1	P01033	TIMP1		0.663511	0.663511
FYACSACR	rRNA N6-adenosine-methyltransferase ZCCHC4	Q9H5U6	ZCCHC4	-1.61877	0.583449	-0.517662	0.14253
FYAPWCGHCK	Thioredoxin domain-containing protein 5	Q8NBS9	TXNDC5	-0.310663		-0.310663
FYNAGLAYCHSK	Retinol dehydrogenase 11	Q8TC12	RDH11	0.410718	0.152912	0.281815	0.563669
GACSVGTNVR	Tubulin-specific chaperone D	Q9BTW9	TBCD		0.724711	0.724711
GACYGADHDLGR	All-trans-retinol 13,14-reductase	Q6NUM9	RETSAT		3.26588	3.26588
GADIMYTGTVDCWR	ADP/ATP translocase 3	P12236	SLC25A6	4.78589		4.78589
GADMNGLPTKGPTEICDK	UPF0729 protein C18orf32	Q8TCD1	C18orf32	1.07221		1.07221
GALVTVGQLSCYDQAK	Mitochondrial dicarboxylate carrier	Q9UBX3	SLC25A10		0.556609	0.556609
GALYCELCYEK	PDZ and LIM domain protein 5	Q96HC4	PDLIM5	0.903466	-3.01051	-1.05352	0.163924
GANDFMCDEMER	T-complex protein 1 subunit alpha	P17987	TCP1	0.304769	0.677846	0.491307	0.636374
GAPNNSCSEIK	Ubiquitin-protein ligase E3A	Q05086	UBE3A		-0.11366	-0.11366
GAQGISCGR	Enhancer of mRNA-decapping protein 3	Q96F86	EDC3		2.00445	2.00445
GASDKCSCCA	Metallothionein-2	P02795	MT2A	-0.228671	-0.0526178	-0.140644	0.448528
GATCSACPNNDKCLDNLCVNR	Glioma pathogenesis-related protein 1	P48060	GLIPR1	0.928723		0.928723
GCEVVVSGK	40S ribosomal protein S3	P23396	RPS3	-0.12501	0.0217576	-0.0516261	0.214882
GCFQAEIVPVTTTVHDDK	3-ketoacyl-CoA thiolase, peroxisomal	P09110	ACAA1		-2.89396	-2.89396
GCGTVLLSGPR	60S ribosomal protein L18	Q07020	RPL18	-0.397354	0.104731	-0.146312	0.17779
GCGVVKFESPEVAER	Heterogeneous nuclear ribonucleoprotein M	P52272	HNRNPM		2.30131	2.30131
GCHINECLSR	Prolow-density lipoprotein receptor-related protein 1	Q07954	LRP1	2.77803	1.86126	2.31964	0.905869
GCHLLVATPGR	ATP-dependent RNA helicase DDX3X	O00571	DDX3X	-1.29093	-0.959241	-1.12509	1.03072
GCLELIK	C-1-tetrahydrofolate synthase, cytoplasmic	P11586	MTHFD1	0.669286	0.848351	0.758818	1.12628
GCLELIKETGVPIAGR	C-1-tetrahydrofolate synthase, cytoplasmic	P11586	MTHFD1		0.0756195	0.0756195
GCLTEQTYPEVVR	Serine/threonine-protein phosphatase 2A 56 kDa regulatory subunit epsilon isoform	Q16537	PPP2R5E	-3.37063		-3.37063
GCPVNTEPSGPTCEK	Cytochrome c-type heme lyase	P53701	HCCS		2.62274	2.62274
GCSKPLCCSCALLDSSHSELK	Protein PML	P29590	PML	0.276428		0.276428
GCTATLGNFAK	40S ribosomal protein S2	P15880	RPS2	0.330661	0.10275	0.216706	0.511171
GDFCIQVGR	Putative nucleoside diphosphate kinase	O60361	NME2P1		-0.166261	-0.166261
GDSGAAPDVDDKLCLR	TP53-binding protein 1	Q12888	TP53BP1	0.222756		0.222756
GEIPALPPCK	Mitochondrial-processing peptidase subunit beta	O75439	PMPCB	1.83723	-0.886555	0.475339	0.104457
GEKSENCGVPEDLLNGLK	Tetratricopeptide repeat protein 1	Q99614	TTC1		0.435409	0.435409
GESVCLDR	Mitochondrial import inner membrane translocase subunit Tim10	P62072	TIMM10	-0.0960301	0.257708	0.0808387	0.138419
GFCHLCDGQEACCVGLEAGINPTDHLITAYR	Pyruvate dehydrogenase E1 component subunit alpha, somatic form, mitochondrial	P08559	PDHA1		2.98695	2.98695
GFPPEAINNFCAR	Glutamine--tRNA ligase	P47897	QARS1	2.0168		2.0168
GFSIPECQK	Citrate synthase, mitochondrial	O75390	CS	1.72217		1.72217
GFSLDQTGSSCEDVDECEGNHR	Fibrillin-1	P35555	FBN1	2.32565		2.32565
GGDCLTSQTR	DnaJ homolog subfamily C member 10	Q8IXB1	DNAJC10	2.25234		2.25234
GGDISVCEWYQR	Cytochrome c oxidase subunit 6B1	P14854	COX6B1	0.720325	0.719205	0.719765	3.30525
GGDPHSCKAVTDEEPFLIFANR	Prolow-density lipoprotein receptor-related protein 1	Q07954	LRP1	1.24399		1.24399
GGGDEESGEHTQVPADSPDSQEEQKGESSASSPEEPEEITCLEK	A-kinase anchor protein 12	Q02952	AKAP12		2.06347	2.06347
GHALLIDCR	Galactokinase	P51570	GALK1		1.36214	1.36214
GHTPLDLTCSTK	Nuclear factor NF-kappa-B p100 subunit	Q00653	NFKB2		-6.08621	-6.08621
GHVLGNGSQVTQAANSGCSK	Leucine zipper protein 1	Q86V48	LUZP1	-0.530119	1.10704	0.288462	0.105512
GICECGVCK	Integrin beta-1	P05556	ITGB1	-0.101151	0.166982	0.0329155	0.0722545
GIGDCVR	Tricarboxylate transport protein, mitochondrial	P53007	SLC25A1	-0.69914		-0.69914
GILLYGPPGCGK	Vesicle-fusing ATPase	P46459	NSF		0.576682	0.576682
GIQVSNNGPCLGSR	Long-chain-fatty-acid--CoA ligase 1	P33121	ACSL1	1.07829	-0.457496	0.310398	0.121794
GISCMNTTLSESPFK	Inorganic pyrophosphatase	Q15181	PPA1	-0.326421	-0.625347	-0.475884	0.712792
GISCMNTTLSESPFKCDPDAAR	Inorganic pyrophosphatase	Q15181	PPA1	-0.765833	-0.621276	-0.693555	1.17976
GLCAIAQAESLR	40S ribosomal protein S3	P23396	RPS3	0.334133	0.314367	0.32425	1.71225
GLECSPSTPTMNSYFYK	Protein VAC14 homolog	Q08AM6	VAC14		1.07946	1.07946
GLESTTLADKDGEIYCK	Cysteine and glycine-rich protein 1	P21291	CSRP1	-0.0387078	0.505862	0.233577	0.26073
GLFSANDWQCK	Zinc finger Ran-binding domain-containing protein 2	O95218	ZRANB2	-1.57429	0.616359	-0.478968	0.132198
GLGDCLVK	ADP/ATP translocase 2	P05141	SLC25A5	0.285058	0.382658	0.333858	1.03433
GLKDGTILCTLMNK	Calponin-2	Q99439	CNN2		-1.43787	-1.43787
GLLDVTCK	S-phase kinase-associated protein 1	P63208	SKP1		1.17852	1.17852
GLPWSCSADEVMR	Heterogeneous nuclear ribonucleoprotein H2	P55795	HNRNPH2	-0.554909		-0.554909
GLYDGPVCEVSVTPK	Dihydropyrimidinase-related protein 2	Q16555	DPYSL2	-0.59504	-1.01082	-0.80293	0.792397
GMDQGLLGMCPGER	Peptidyl-prolyl cis-trans isomerase FKBP10	Q96AY3	FKBP10	0.0543339		0.0543339
GMPETTQPDKQCGQVAAAAAAQPPASHGPER	BAG family molecular chaperone regulator 3	O95817	BAG3	-0.149419	-0.307336	-0.228377	0.673842
GNGIVECLGPK	SUMO-activating enzyme subunit 1	Q9UBE0	SAE1	5.00379	4.42444	4.71412	1.40816
GNHECASINR	Serine/threonine-protein phosphatase PP1-alpha catalytic subunit	P62136	PPP1CA	0.566064	0.124038	0.345051	0.440486
GNPEPPVSGEMDDNSLSPEACYECK	Fibrillin-1	P35555	FBN1	0.564368		0.564368
GPAESPDEGITTTEGEGECEQTPEELEPVEK	Microtubule-associated protein 1B	P46821	MAP1B	0.358235	0.229548	0.293892	0.862603
GPCIIYNEDNGIIK	60S ribosomal protein L4	P36578	RPL4	0.0370432	0.130651	0.0838468	0.489299
GPQLFHMDPSGTFVQCDAR	Proteasome subunit alpha type-5	P28066	PSMA5	0.979102	1.90928	1.44419	0.702588
GPSGCVESLEVTCR	Glutamine--tRNA ligase	P47897	QARS1	-0.627303	-1.83119	-1.22925	0.537763
GPTKEELCK	Protein Niban 2	Q96TA1	NIBAN2		0.410151	0.410151
GQDHCGIESEVVAGIPR	Cathepsin B	P07858	CTSB	0.552513	0.335428	0.443971	0.81631
GQEFLRPCGSTEVD	Prolyl 4-hydroxylase subunit alpha-2	O15460	P4HA2		-0.799154	-0.799154
GQKCEFQDAYVLLSEK	60 kDa heat shock protein, mitochondrial	P10809	HSPD1	0.128773	-0.134564	-0.00289583	0.00612271
GQKCEFQDAYVLLSEKK	60 kDa heat shock protein, mitochondrial	P10809	HSPD1		-1.26657	-1.26657
GQLCELSCSTDYR	Protein arginine N-methyltransferase 1	Q99873	PRMT1	-0.750707	0.586825	-0.0819409	0.035088
GQSTDSLPQTICR	FERM domain-containing protein 6	Q96NE9	FRMD6		0.300209	0.300209
GQVCLPVISAENWKPATK	Ubiquitin-conjugating enzyme E2 L3	P68036	UBE2L3	1.12874	1.24826	1.1885	1.49507
GQVLSTINTNQMNNTHAAVSPCGR	Transducin beta-like protein 2	Q9Y4P3	TBL2	-0.144452	0.129744	-0.00735395	0.0150748
GSAITGPVAKECADLWPR	60S ribosomal protein L23	P62829	RPL23	-0.177437	0.00490914	-0.0862639	0.285998
GSCIANAEEVDVPIK	Ephrin type-B receptor 2	P29323	EPHB2		-1.95847	-1.95847
GSCSTEVEKETQEK	V-type proton ATPase subunit G 1	O75348	ATP6V1G1	0.204462	0.233839	0.21915	1.37053
GSDFDCELR	Heterogeneous nuclear ribonucleoprotein K	P61978	HNRNPK	-3.16996		-3.16996
GSPGCVMDAVLR	Ankyrin repeat and SOCS box protein 1	Q9Y576	ASB1	3.20772	0.461166	1.83444	0.388173
GSQFGQSCCLR	Bifunctional glutamate/proline--tRNA ligase	P07814	EPRS1	-0.879779		-0.879779
GSSCFECTHYQSFLEYR	Catechol O-methyltransferase	P21964	COMT		0.167203	0.167203
GSSGPQPAKPCSGATPTPLLLVGDR	MICAL-like protein 1	Q8N3F8	MICALL1		1.44278	1.44278
GSSPQNTTTPKPSVEGQQPAAAAACEPVDHAQSESILK	Inverted formin-2	Q27J81	INF2	0.24182		0.24182
GTAVAICR	Sarcoplasmic/endoplasmic reticulum calcium ATPase 2	P16615	ATP2A2	2.56432		2.56432
GTCSRPDTECK	Muscleblind-like protein 1	Q9NR56	MBNL1	0.233432		0.233432
GTDIMYTGTLDCWRK	ADP/ATP translocase 2	P05141	SLC25A5		-1.32791	-1.32791
GTEAGQVGEPGIPTGEAGPSCSSASDKLPR	Protein phosphatase 1G	O15355	PPM1G	0.728435	0.109376	0.418906	0.392417
GTNPCSVNNGDCSQLCLPTSETTR	Prolow-density lipoprotein receptor-related protein 1	Q07954	LRP1		2.05049	2.05049
GVCSCVEAGK	DNA (cytosine-5)-methyltransferase 1	P26358	DNMT1	0.181533		0.181533
GVLFQPCER	Prolow-density lipoprotein receptor-related protein 1	Q07954	LRP1	0.770941		0.770941
GVNEDTYSGILDCAR	Mitochondrial glutamate carrier 1	Q9H936	SLC25A22		1.32668	1.32668
GVNTVFHCASPPPSSNNK	Sterol-4-alpha-carboxylate 3-dehydrogenase, decarboxylating	Q15738	NSDHL		2.08153	2.08153
GVQFAPFSTCR	Alkyldihydroxyacetonephosphate synthase, peroxisomal	O00116	AGPS	0.624956	2.48552	1.55524	0.464478
GVTIIGPATVGGIKPGCFK	ATP-citrate synthase	P53396	ACLY	0.193606	-0.176935	0.00833548	0.0126121
GVVLCTFTR	28S ribosomal protein S12, mitochondrial	O15235	MRPS12	0.228732		0.228732
GYAASCR	Transcription factor MafF	Q9ULX9	MAFF		0.607753	0.607753
GYDSAGVGFDGGNDKDWEANACK	Glutamine--fructose-6-phosphate aminotransferase [isomerizing] 1	Q06210	GFPT1	1.19332		1.19332
GYHYATCLEGALK	Glutamine--fructose-6-phosphate aminotransferase [isomerizing] 1	Q06210	GFPT1	-1.36388		-1.36388
GYIGTHCGQPVCESGCLNGGR	Fibrillin-1	P35555	FBN1	1.68137	1.4795	1.58044	1.39144
GYNYATCLEGALK	Glutamine--fructose-6-phosphate aminotransferase [isomerizing] 2	O94808	GFPT2	0.853876	0.69858	0.776228	1.19742
GYVSCALGCPYEGK	Hydroxymethylglutaryl-CoA lyase, mitochondrial	P35914	HMGCL	2.43868	1.09256	1.76562	0.63478
HAACPVLVGCK	Prolyl 4-hydroxylase subunit alpha-2	O15460	P4HA2	1.9755		1.9755
HCDEVGFNAEEAHNIVK	Dynein light chain Tctex-type 3	P51808	DYNLT3	-0.730725	-0.1021	-0.416413	0.385503
HCDSINSDFGSESGGCGDSSPGPSASQGPR	Serine/threonine-protein kinase Nek9	Q8TD19	NEK9	0.501766	1.33049	0.916129	0.567973
HCECSTDEVNSEDMDAYCR	Integrin beta-1	P05556	ITGB1	0.829569	0.437008	0.633288	0.718204
HCIMQANAEYHQSILAK	Programmed cell death 6-interacting protein	Q8WUM4	PDCD6IP	1.21497		1.21497
HCLLTCEECK	OCIA domain-containing protein 2	Q56VL3	OCIAD2	1.26674	0.77342	1.02008	0.820912
HCNNGIPEDSKVEGPAFTDAIR	Protein Niban 2	Q96TA1	NIBAN2		0.341247	0.341247
HCSQVDSVR	Src substrate cortactin	Q14247	CTTN	1.00768	-2.39937	-0.695844	0.123132
HDLDLICR	Serine/threonine-protein phosphatase PP1-alpha catalytic subunit	P62136	PPP1CA		-1.55036	-1.55036
HEASDFPCR	Tyrosine-protein phosphatase non-receptor type 1	P18031	PTPN1	0.28982	0.227343	0.258581	1.11613
HECQANGPEDLNR	Destrin	P60981	DSTN	0.052734		0.052734
HECQANGPEDLNRACIAEK	Destrin	P60981	DSTN		1.44723	1.44723
HEFSVDMTCGGCAEAVSR	Copper transport protein ATOX1	O00244	ATOX1		-0.26288	-0.26288
HELQANCYEEVK	Cofilin-1	P23528	CFL1	-1.34506		-1.34506
HELQANCYEEVKDR	Cofilin-1	P23528	CFL1	-0.361867	-0.7135	-0.537683	0.696391
HEQNIDCGGGYVK	Calreticulin	P27797	CALR	-0.071496	0.0794987	0.00400136	0.0148922
HFCPNVPIILVGNK	Transforming protein RhoA	P61586	RHOA	0.159489	-0.0421577	0.0586656	0.177495
HFCPNVPIILVGNKK	Transforming protein RhoA	P61586	RHOA	0.580538		0.580538
HFNDPGSPCFNR	E3 ubiquitin-protein ligase RNF14	Q9UBS8	RNF14		1.64325	1.64325
HFPEAGIHYPDSTTGDGKPLATDYNGNCSLEK	NADH dehydrogenase [ubiquinone] 1 alpha subcomplex subunit 10, mitochondrial	O95299	NDUFA10	3.64467		3.64467
HFVGMLPEKDCR	Destrin	P60981	DSTN		-0.622008	-0.622008
HGALAELCPPGGSHR	Melanophilin	Q9BV36	MLPH	-2.66308	2.3869	-0.13809	0.0153744
HGFCGIPITDTGR	Inosine-5'-monophosphate dehydrogenase 2	P12268	IMPDH2	1.37501	1.31336	1.34419	1.83571
HGGPQYCR	Prostaglandin E synthase	O14684	PTGES		0.437503	0.437503
HHCPSTPIILVGTK	Ras-related C3 botulinum toxin substrate 2	P15153	RAC2	1.69614	1.01848	1.35731	0.807603
HHPDLIFCR	PHD finger-like domain-containing protein 5A	Q7RTV0	PHF5A	-1.73444	0.663542	-0.535451	0.135125
HIGDGCCLTR	Methyltransferase-like protein 7B	Q6UX53	METTL7B		1.48065	1.48065
HIVPACFLAPLK	Exportin-T	O43592	XPOT	2.09945		2.09945
HLNEIDLFHCIDPNDSK	Prostaglandin E synthase 3	Q15185	PTGES3	-0.835073	-0.665614	-0.750343	1.14518
HLVCSSGGNAGIAAAYAAR	Serine dehydratase-like	Q96GA7	SDSL	-3.65221		-3.65221
HNYPDLVERDCNGDTPNLSFYR	Opioid growth factor receptor	Q9NZT2	OGFR	1.89129		1.89129
HPHDIIDDINSGAVECPAS	60S ribosomal protein L12	P30050	RPL12	-1.26775	-0.0225552	-0.645151	0.31098
HQSLQCR	Urokinase plasminogen activator surface receptor	Q03405	PLAUR	1.06863		1.06863
HSMNPFCEIAVEEAVR	Electron transfer flavoprotein subunit beta	P38117	ETFB	-0.195742	0.579985	0.192122	0.150449
HTGCCGDNDPIDVCEIGSK	Inorganic pyrophosphatase	Q15181	PPA1	-0.504586	-0.435947	-0.470267	1.33369
HTGPGILSMANAGPNTNGSQFFICTAK	Peptidyl-prolyl cis-trans isomerase A	P62937	PPIA		-5.48858	-5.48858
HTHIDKPDCSGPPMDISNK	Transmembrane 9 superfamily member 2	Q99805	TM9SF2		1.20357	1.20357
HTNSVICK	Protein sprouty homolog 4	Q9C004	SPRY4	0.316162		0.316162
HTSCSSAGNDSKPVQEAPSVAR	Stromal interaction molecule 2	Q9P246	STIM2		1.09288	1.09288
HVLTGSADNSCR	Eukaryotic translation initiation factor 3 subunit I	Q13347	EIF3I		0.471591	0.471591
HYAHTDCPGHADYVK	Elongation factor Tu, mitochondrial	P49411	TUFM	1.44495	0.22487	0.834912	0.396082
IAACQEQILR	Programmed cell death protein 2-like	Q9BRP1	PDCD2L		0.135772	0.135772
IAAESSENVDCPENPK	Leucine-rich repeat flightless-interacting protein 1	Q32MZ4	LRRFIP1	0.366279	0.927249	0.646764	0.584189
IAAESSENVDCPENPKIK	Leucine-rich repeat flightless-interacting protein 1	Q32MZ4	LRRFIP1	0.640771	0.0826204	0.361696	0.378444
IACHEEPVMDLDFDSQK	Guanine nucleotide-binding protein subunit beta-like protein 1	Q9BYB4	GNB1L	-0.292236		-0.292236
IAIKNCDGVPALVR	Catenin delta-1	O60716	CTNND1		1.15862	1.15862
IAILTCPFEPPKPK	T-complex protein 1 subunit epsilon	P48643	CCT5	0.282695	0.0090941	0.145894	0.319187
IAIWTTECENR	Eukaryotic translation initiation factor 4E	P06730	EIF4E	-0.22835		-0.22835
IALESEGRPEEQMESDNCSGGDDDWTHLSSK	Sequestosome-1	Q13501	SQSTM1	1.01775	0.0766241	0.547187	0.344707
IAQLICER	Deoxyuridine 5'-triphosphate nucleotidohydrolase, mitochondrial	P33316	DUT		-0.242642	-0.242642
IATGHNIIDELPPCK	Synaptophysin-like protein 1	Q16563	SYPL1	-0.345302	0.281781	-0.0317606	0.0288485
IATGHNIIDELPPCKK	Synaptophysin-like protein 1	Q16563	SYPL1	0.500769	0.339548	0.420158	0.918388
IAVAAQNCYK	Triosephosphate isomerase	P60174	TPI1	3.77294	1.60506	2.689	0.61272
IAVHCTVR	60S ribosomal protein L11	P62913	RPL11	0.211102	0.219661	0.215382	1.89797
IAVYSCPFDGMITETK	T-complex protein 1 subunit theta	P50990	CCT8		-0.337009	-0.337009
ICAVGITK	Exportin-2	P55060	CSE1L	-0.071096		-0.071096
ICCIGAGYVGGPTCSVIAHMCPEIR	UDP-glucose 6-dehydrogenase	O60701	UGDH		0.227541	0.227541
ICDECNYGSYQGR	PHD finger-like domain-containing protein 5A	Q7RTV0	PHF5A	0.355835	-0.155685	0.100075	0.117726
ICEPGYSPTYK	Cathepsin B	P07858	CTSB	0.886738	0.0905239	0.488631	0.361277
ICEPGYSPTYKQDK	Cathepsin B	P07858	CTSB	0.321069	0.419683	0.370376	1.0744
ICGDIHGQYYDLLR	Serine/threonine-protein phosphatase PP1-alpha catalytic subunit	P62136	PPP1CA		-0.227683	-0.227683
ICLQPPPTSR	Valine--tRNA ligase	P26640	VARS1	-0.578056	2.40177	0.911856	0.186845
ICNEILTSPCSPEIR	Condensin complex subunit 3	Q9BPX3	NCAPG		0.243152	0.243152
ICSVDGIPAR	Ras-related protein R-Ras	P10301	RRAS	1.25116	1.47168	1.36142	1.28864
ICSWNVDGLR	DNA-(apurinic or apyrimidinic site) lyase	P27695	APEX1	-0.30729	-0.691456	-0.499373	0.631214
ICVNGDDAHPLWK	Phospholipid hydroperoxide glutathione peroxidase	P36969	GPX4	0.845433	0.0198611	0.432647	0.314216
IDCVSKNEDIPNVAVYPHNGMIDLK	Sodium/potassium-transporting ATPase subunit beta-3	P54709	ATP1B3		0.958633	0.958633
IDPTVTMMQVEEKPDVTYSDVGGCK	26S proteasome regulatory subunit 7	P35998	PSMC2	0.19948	1.24955	0.724515	0.398788
IDPTVTMMQVEEKPDVTYSDVGGCKEQIEK	26S proteasome regulatory subunit 7	P35998	PSMC2	2.37951	2.18998	2.28474	1.57856
IEGDMIVCAAYAHELPK	60S ribosomal protein L5	P46777	RPL5	0.207389	-0.0823149	0.0625371	0.130451
IENLELMSQHGCNAWK	Pre-mRNA-splicing factor SPF27	O75934	BCAS2	0.871794		0.871794
IENRFPDEATCMGFCAPK	Tissue factor pathway inhibitor 2	P48307	TFPI2	2.97957	0.904775	1.94217	0.505403
IFCCHGGLSPDLQSMEQIR	Serine/threonine-protein phosphatase PP1-alpha catalytic subunit	P62136	PPP1CA	0.22135	0.554669	0.38801	0.587919
IFNIPCDDIR	Sphingosine-1-phosphate phosphatase 1	Q9BX95	SGPP1	-1.60058		-1.60058
IFNIPCDDIRK	Sphingosine-1-phosphate phosphatase 1	Q9BX95	SGPP1	4.14422		4.14422
IGAFGYMECSAK	Transforming protein RhoA	P61586	RHOA	0.0386437	-0.304923	-0.13314	0.236383
IGKPHTVPCK	40S ribosomal protein S2	P15880	RPS2	0.797755	0.214883	0.506319	0.478214
IGLDFCK	ATP-dependent RNA helicase DDX3X	O00571	DDX3X		-0.952695	-0.952695
IGNCPFSQR	Chloride intracellular channel protein 1	O00299	CLIC1	-0.414895	-0.393134	-0.404014	1.76599
IGSCTQQDVELHVQK	Aspartate--tRNA ligase, cytoplasmic	P14868	DARS1	0.0571992	0.116638	0.0869185	0.678317
IGSSLYALGTQDSTDICK	Sorting nexin-6	Q9UNH7	SNX6	0.0999487	1.20474	0.652345	0.349396
IHECQWVVEDAPNPDVLLSHKDDVK	Protein Niban 1	Q9BZQ8	NIBAN1	1.17425	-0.438673	0.36779	0.138104
IHEGCEEPATHNALAK	Clathrin heavy chain 1	Q00610	CLTC	-1.5992	-0.326449	-0.962822	0.429684
IHMGSCAENTAK	Acetyl-CoA acetyltransferase, mitochondrial	P24752	ACAT1	0.629563	0.111241	0.370402	0.410428
IIANALSSEPACLAEIEEDKAR	DNA-dependent protein kinase catalytic subunit	P78527	PRKDC	0.537384	0.232005	0.384695	0.618811
IIDINYYPVPEACLSNKR	Ribonucleoside-diphosphate reductase large subunit	P23921	RRM1	2.25085		2.25085
IIHEDGYSEDECKQYK	Guanine nucleotide-binding protein G(i) subunit alpha	P08754	GNAI3	1.22956	1.41611	1.32284	1.34858
IIHEDGYSEEECR	Guanine nucleotide-binding protein G(i) subunit alpha-2	P04899	GNAI2	0.677697		0.677697
IINDNATYCR	Nucleolar protein 56	O00567	NOP56	0.389683		0.389683
IISANGCK	Sodium/potassium-transporting ATPase subunit alpha-1	P05023	ATP1A1	1.29677	2.33661	1.81669	0.750921
IISANGCKVDNSSLTGESEPQTR	Sodium/potassium-transporting ATPase subunit alpha-1	P05023	ATP1A1	-0.53404	-0.232565	-0.383303	0.622457
IISNASCTTNCLAPLAK	Glyceraldehyde-3-phosphate dehydrogenase	P04406	GAPDH	-0.777157	-0.808257	-0.792707	1.90356
IIYGGSVTGATCK	Triosephosphate isomerase	P60174	TPI1		-1.55649	-1.55649
IKCVAFD	Galectin-1	P09382	LGALS1	-0.390259	-0.387672	-0.388966	2.67426
IKNCLNPQFSK	Copine-3	O75131	CPNE3	-1.67824	1.26753	-0.205353	0.0400959
IKNPSIDLCTCPR	Putative ATP-dependent RNA helicase DHX57	Q6P158	DHX57	-0.753473		-0.753473
ILACDDLDEAAR	Succinate--CoA ligase [ADP-forming] subunit beta, mitochondrial	Q9P2R7	SUCLA2		-0.0879597	-0.0879597
ILAFPCNQFGK	Phospholipid hydroperoxide glutathione peroxidase	P36969	GPX4	-0.233916	0.166478	-0.0337189	0.0487733
ILDDICVAK	Lysine--tRNA ligase	Q15046	KARS1	0.353601	0.417057	0.385329	1.28148
ILEIPGPGDNQHFGDLHQTELGPSGAGCQVGINQNGTGK	Enhancer of mRNA-decapping protein 3	Q96F86	EDC3	0.940966	0.95213	0.946548	2.42548
ILGENAKPNYGCQVTIQSEQEK	Activating signal cointegrator 1 complex subunit 3	Q8N3C0	ASCC3		0.977989	0.977989
ILLCLK	tRNA methyltransferase 10 homolog C	Q7L0Y3	TRMT10C	-2.75156		-2.75156
ILLNACCPGWVR	Carbonyl reductase [NADPH] 1	P16152	CBR1	0.265534		0.265534
ILQDDLTCR	Prolow-density lipoprotein receptor-related protein 1	Q07954	LRP1		-1.08417	-1.08417
ILQDSLGGNCR	Kinesin-1 heavy chain	P33176	KIF5B	1.71288		1.71288
ILRGQDHCGIESEVVAGIPR	Cathepsin B	P07858	CTSB	-0.442822	0.357837	-0.0424928	0.0302681
ILTCNGSVDDSR	Muskelin	Q9UL63	MKLN1	-0.073301	1.44255	0.684624	0.273826
ILVALCGGN	Annexin A1	P04083	ANXA1	-0.630609		-0.630609
ILYSQCGDVMR	Myosin light polypeptide 6	P60660	MYL6	9.25608	0.52695	4.89151	0.333673
IMDCVGCFK	ERO1-like protein alpha	Q96HE7	ERO1A		-0.734755	-0.734755
IMRECQEESFWK	OCIA domain-containing protein 2	Q56VL3	OCIAD2	-0.258156		-0.258156
IMRECQEESFWKR	OCIA domain-containing protein 2	Q56VL3	OCIAD2	0.993177		0.993177
INDALSCEYECR	Protein FAM98B	Q52LJ0	FAM98B	-0.293937	-0.0357225	-0.16483	0.373651
INISEGNCPER	Poly(rC)-binding protein 1	Q15365	PCBP1	0.0409696	-0.104652	-0.0318412	0.132208
INKTEICSQL	Metalloreductase STEAP1	Q9UHE8	STEAP1	0.50886		0.50886
INPICNDHYR	Lymphokine-activated killer T-cell-originated protein kinase	Q96KB5	PBK	0.0898027	1.06426	0.57703	0.350267
INPYMSSPCHIEMILTEK	60S ribosomal protein L17	P18621	RPL17		0.352578	0.352578
IPCNDSK	Eukaryotic translation initiation factor 3 subunit I	Q13347	EIF3I		0.422593	0.422593
IPPGCNLK	Mothers against decapentaplegic homolog 2	Q15796	SMAD2	2.5303		2.5303
IPSFCYSPKDEGLCSANVTR	Tissue factor pathway inhibitor 2	P48307	TFPI2	-0.401371		-0.401371
ISAFGYLECSAK	Rho-related GTP-binding protein RhoC	P08134	RHOC	0.0463475	-0.10837	-0.0310115	0.120743
ISCEDEQAR	Tyrosine-protein phosphatase non-receptor type 12	Q05209	PTPN12		-2.29932	-2.29932
ISCMSKPPAPNPTPPR	Dual specificity mitogen-activated protein kinase kinase 3	P46734	MAP2K3	0.99606	0.916817	0.956438	1.57909
ISIQCR	DNA replication licensing factor MCM5	P33992	MCM5		-0.555472	-0.555472
ISLNSLCYGDMDK	Copine-3	O75131	CPNE3	0.52969	-1.5582	-0.514253	0.149593
ISSTLKVEPCSLTPGYTK	Elongator complex protein 4	Q96EB1	ELP4	0.0297272	-0.210277	-0.0902751	0.229585
ITHSPLTICFPEYTGANKYDEAASYIQSK	Guanine nucleotide-binding protein G(i) subunit alpha-2	P04899	GNAI2		0.670984	0.670984
IVEACK	Ubiquitin-like-conjugating enzyme ATG3	Q9NT62	ATG3	0.981017		0.981017
IVEAGCVCNDAVIR	Calcium-transporting ATPase type 2C member 1	P98194	ATP2C1		0.995462	0.995462
IVEDDASISSCNK	Wings apart-like protein homolog	Q7Z5K2	WAPL	0.993329	2.10341	1.54837	0.659311
IVLRLECVEPNCR	60S ribosomal protein L36a	P83881	RPL36A	0.565691		0.565691
IVSLPECFNSPYGAK	Omega-amidase NIT2	Q9NQR4	NIT2	-1.16371		-1.16371
IVTCGTDR	Actin-related protein 2/3 complex subunit 1B	O15143	ARPC1B	0.302502		0.302502
IVVEHIIMKPACPLFVR	Transmembrane protein 33	P57088	TMEM33	0.193859	1.63237	0.913115	0.371869
IVVVGDSQCGK	Rho-related GTP-binding protein RhoE	P61587	RND3		-0.433066	-0.433066
IWEQIQPDLHTNDECVATYK	Aminoacyl tRNA synthase complex-interacting multifunctional protein 1	Q12904	AIMP1	-0.714348	-0.606434	-0.660391	1.28483
IWGTEGDSWICK	Probable cytosolic iron-sulfur protein assembly protein CIAO1	O76071	CIAO1	0.0407755	0.123236	0.0820056	0.527862
IYCEDKQTFLQDCEDDGETAAGGR	Protein IMPACT	Q9P2X3	IMPACT		0.408611	0.408611
IYGETPEACR	Fragile X mental retardation syndrome-related protein 2	P51116	FXR2		-1.52474	-1.52474
IYGFYDECK	Serine/threonine-protein phosphatase PP1-alpha catalytic subunit	P62136	PPP1CA	0.314105	0.0306996	0.172402	0.35855
IYHPNVDENGQICLPIISSENWKPCTK	Ubiquitin/ISG15-conjugating enzyme E2 L6	O14933	UBE2L6		1.82485	1.82485
KAAAPAPEEEMDECEQALAAEPK	Elongation factor 1-gamma	P26641	EEF1G	2.72385	-0.0267655	1.34854	0.29563
KACADATLSQITNNIDPVGR	Guanine nucleotide-binding protein G(I)/G(S)/G(T) subunit beta-1	P62873	GNB1	-0.00556496	0.175712	0.0850733	0.283867
KACGDSTLTQITAGLDPVGR	Guanine nucleotide-binding protein G(I)/G(S)/G(T) subunit beta-2	P62879	GNB2	0.124947	-0.0158935	0.0545268	0.236163
KACQIFVR	Heterogeneous nuclear ribonucleoprotein M	P52272	HNRNPM	-1.61232		-1.61232
KADVEGELLACR	Proliferation marker protein Ki-67	P46013	MKI67	1.50252	0.113282	0.807901	0.344772
KAEAATEACQLPTSSGDAGR	DCN1-like protein 3	Q8IWE4	DCUN1D3	-0.0211513	-0.533859	-0.277505	0.323498
KAQCPIVER	40S ribosomal protein S5	P46782	RPS5	-0.408823	0.151584	-0.128619	0.139038
KAVVVCPKDEDYK	Heterogeneous nuclear ribonucleoprotein U	Q00839	HNRNPU		-0.922452	-0.922452
KCAGCTNPISGLGGTK	Four and a half LIM domains protein 2	Q14192	FHL2	-0.170968	-0.361088	-0.266028	0.660585
KCDLISIPK	Coronin-1C	Q9ULV4	CORO1C	0.0832287		0.0832287
KCEPIIMTVPR	Coronin-1C	Q9ULV4	CORO1C		-0.783831	-0.783831
KCPFTGNVSIR	40S ribosomal protein S11	P62280	RPS11	0.144751	0.680698	0.412725	0.435797
KCSLPAEEDSVLEK	Microtubule-associated protein 4	P27816	MAP4	-1.0265		-1.0265
KDDYEYCMSEYLR	Geranylgeranyl transferase type-2 subunit beta	P53611	RABGGTB	1.40812	-1.08165	0.163234	0.037632
KEAESCDCLQGFQLTHSLGGGTGSGMGTLLISK	Tubulin beta-4B chain	P68371	TUBB4B		0.273209	0.273209
KECENCDCLQGFQLTHSLGGGTGSGMGTLLISK	Tubulin beta-3 chain	Q13509	TUBB3		0.242232	0.242232
KEEECQAGAAEMR	CDK5 regulatory subunit-associated protein 3	Q96JB5	CDK5RAP3		-0.519157	-0.519157
KEEGSFQSCSFCKPK	Gremlin-1	O60565	GREM1	0.920917	2.53013	1.72553	0.556311
KENQWCEEK	S-phase kinase-associated protein 1	P63208	SKP1		0.101076	0.101076
KFDFDACNEVPPAPK	Scaffold attachment factor B2	Q14151	SAFB2	-0.444833	1.34733	0.45125	0.153037
KFLDGNEMTLADCNLLPK	Chloride intracellular channel protein 4	Q9Y696	CLIC4		0.956629	0.956629
KFMADCPHTIGVEFGTR	Ras-related protein Rab-14	P61106	RAB14	0.493446		0.493446
KGADIMYTGTVDCWR	ADP/ATP translocase 3	P12236	SLC25A6	0.521186	-0.00127143	0.259958	0.299683
KGDECELLGHSK	Elongation factor Tu, mitochondrial	P49411	TUFM	0.0886797	-0.743066	-0.327193	0.239865
KGTDIMYTGTLDCWR	ADP/ATP translocase 2	P05141	SLC25A5	0.518529	0.919885	0.719207	0.761382
KGTDIMYTGTLDCWRK	ADP/ATP translocase 2	P05141	SLC25A5	0.268863	0.48087	0.374866	0.755868
KGVLFGVPGAFTPGCSK	Peroxiredoxin-5, mitochondrial	P30044	PRDX5	-1.29804	-0.384198	-0.841121	0.499212
KIALESEGRPEEQMESDNCSGGDDDWTHLSSK	Sequestosome-1	Q13501	SQSTM1	0.105963		0.105963
KICMQR	40S ribosomal protein S4, X isoform	P62701	RPS4X		-0.251186	-0.251186
KIPSFCYSPKDEGLCSANVTR	Tissue factor pathway inhibitor 2	P48307	TFPI2	0.84873	0.548829	0.69878	0.871049
KITGLCQEEHR	39S ribosomal protein S18a, mitochondrial	Q9NVS2	MRPS18A	0.194028		0.194028
KIYCVACQELDSDVDKDNPALNAQAALSQAR	Protein ZNRD2	O60232	ZNRD2	0.809395		0.809395
KKPCSETSQIEDTPSSKPTLLANGGHGVEGSDTTGSPTEFLEEK	Microtubule-associated protein 4	P27816	MAP4	1.03042		1.03042
KKVCDIAAELAR	Importin-5	O00410	IPO5	-0.240381	-1.28191	-0.761144	0.417945
KLFAPQQILQCSPAN	Thymidine kinase, cytosolic	P04183	TK1	0.387402	0.258793	0.323098	0.902849
KLGEWVGLCK	40S ribosomal protein S12	P25398	RPS12	-0.265146		-0.265146
KLGNNCVFAPADVTSEKDVQTALALAK	3-hydroxyacyl-CoA dehydrogenase type-2	Q99714	HSD17B10		-0.245467	-0.245467
KLLAPDCEIIQEVGK	Exosome complex component RRP40	Q9NQT5	EXOSC3	-0.296214	1.89576	0.799772	0.222809
KLLMMAGIDDCYTSAR	40S ribosomal protein S2	P15880	RPS2	0.953616		0.953616
KLLPDDPYEKACQK	Glutathione S-transferase omega-1	P78417	GSTO1	-1.38682	-1.1246	-1.25571	1.17895
KLSGCSQDCEDLK	Prolow-density lipoprotein receptor-related protein 1	Q07954	LRP1		0.138829	0.138829
KLVEALCAAGHR	Thymidylate kinase	P23919	DTYMK		2.29216	2.29216
KLVIVGDGACGK	Transforming protein RhoA	P61586	RHOA	-0.18132	0.11007	-0.0356246	0.0719462
KMLSSGVCTSTVQLPGK	Retinol dehydrogenase 11	Q8TC12	RDH11	0.23669	0.47308	0.354885	0.688944
KNEPPLTCPYSLK	Translocation protein SEC63 homolog	Q9UGP8	SEC63	0.629622	-2.45522	-0.9128	0.18058
KPADDQDPIDALSGDLDSCPSTTETSQNTAK	Calpastatin	P20810	CAST		0.258405	0.258405
KPASFMTSICDER	ATP-citrate synthase	P53396	ACLY	1.31268	-1.426	-0.0566591	0.0115866
KPCNSQPSELSSETSGIARPEEGRPVVSGTGNDITTPPNK	Microtubule-associated protein 4	P27816	MAP4	-1.47094	1.10246	-0.18424	0.0412169
KPNSVVISCGMK	Developmentally-regulated GTP-binding protein 2	P55039	DRG2		1.09391	1.09391
KPSSPPEELKFQCGQK	Urokinase-type plasminogen activator	P00749	PLAU	3.22081	1.96542	2.59312	0.820469
KPSYAEICQR	La-related protein 4B	Q92615	LARP4B	-0.0945103	-0.603058	-0.348784	0.396818
KPTDGASSSNCVTDISHLVR	Nuclear autoantigenic sperm protein	P49321	NASP	-0.678904		-0.678904
KQCVDHYNEVK	NADH dehydrogenase [ubiquinone] 1 alpha subcomplex subunit 10, mitochondrial	O95299	NDUFA10	2.31508		2.31508
KQEAEICSLK	Coiled-coil domain-containing protein 73	Q6ZRK6	CCDC73		0.643386	0.643386
KSATVKPGAVGAGEFVSPCESGDNTGEPSALEEQR	TP53-binding protein 1	Q12888	TP53BP1		0.292399	0.292399
KSCCSCCPVGCAK	Metallothionein-2	P02795	MT2A	0.460013	1.43244	0.946227	0.519735
KSSGEIVYCGQVFEK	60S ribosomal protein L18a	Q02543	RPL18A	-0.777814	-0.601351	-0.689583	1.09144
KTCAAQLVSYPGK	Nuclear cap-binding protein subunit 1	Q09161	NCBP1	-0.814783	1.5873	0.386261	0.0958738
KTFVGTPCWMAPEVMEQVR	STE20/SPS1-related proline-alanine-rich protein kinase	Q9UEW8	STK39		-1.29465	-1.29465
KTYITDPVSAPCAPPLQPK	Lipoma-preferred partner	Q93052	LPP		-0.668879	-0.668879
KVIGIECSSISDYAVK	Protein arginine N-methyltransferase 1	Q99873	PRMT1	-0.25463	-0.240842	-0.247736	1.75175
KVVGCSCVVVK	40S ribosomal protein S12	P25398	RPS12	-0.4083	-0.361571	-0.384935	1.41349
KVVGCSCVVVKDYGK	40S ribosomal protein S12	P25398	RPS12	-0.477094	-0.338687	-0.40789	0.970653
KYDGYTSCPLVTGYNR	Sulfide:quinone oxidoreductase, mitochondrial	Q9Y6N5	SQOR	0.214548	1.29631	0.75543	0.402764
KYEDICPSTHNMDVPNIK	Eukaryotic translation initiation factor 5A-1	P63241	EIF5A	-0.84964	-0.600489	-0.725064	0.965284
KYEDICPSTHNMDVPNIKR	Eukaryotic translation initiation factor 5A-1	P63241	EIF5A	0.209361	0.0355883	0.122475	0.405819
KYTELPHGAISEDQAVGPADIPCDSTGQTST	dCTP pyrophosphatase 1	Q9H773	DCTPP1	-0.974989		-0.974989
LAAPDPCDPQR	PRA1 family protein 2	O60831	PRAF2	0.39448	0.554976	0.474728	0.972216
LAEYKCNTNTAIELK	Histone acetyltransferase type B catalytic subunit	O14929	HAT1	0.220984	0.394443	0.307714	0.757223
LALEDGCGPGPGPPR	E3 ubiquitin-protein ligase TRIM47	Q96LD4	TRIM47	0.0250277		0.0250277
LASADDIGTLICK	Nucleosome-remodeling factor subunit BPTF	Q12830	BPTF		2.26443	2.26443
LASCSDDR	Probable cytosolic iron-sulfur protein assembly protein CIAO1	O76071	CIAO1	0.35868	0.185415	0.272047	0.707156
LASGCDGSEIPDEVK	STE20/SPS1-related proline-alanine-rich protein kinase	Q9UEW8	STK39	2.20333	1.97516	2.08925	1.45933
LCASGAGATPDTAIEEIKEK	Cytosolic Fe-S cluster assembly factor NUBP1	P53384	NUBP1	-0.276394	-1.09736	-0.686879	0.464805
LCDGSAAPASSVGGHLCGTLAGCVR	BRCA1-associated ATM activator 1	Q6PJG6	BRAT1	0.354802		0.354802
LCDTSSAR	ORC ubiquitin ligase 1	Q5W0B1	OBI1		0.485658	0.485658
LCEGFNEVLK	Coiled-coil-helix-coiled-coil-helix domain-containing protein 2	Q9Y6H1	CHCHD2		-0.518185	-0.518185
LCEGTPQEGGLR	Protein AHNAK2	Q8IVF2	AHNAK2	-1.86583		-1.86583
LCFLDKVEPHATIAEIK	Very-long-chain enoyl-CoA reductase	Q9NZ01	TECR	0.578104	0.438479	0.508291	1.06101
LCNGVQDCMDGSDEGPHCR	Prolow-density lipoprotein receptor-related protein 1	Q07954	LRP1		0.731655	0.731655
LCPNSTGAEIR	26S proteasome regulatory subunit 7	P35998	PSMC2	0.141954	0.220195	0.181074	0.868199
LCPVASCPDAR	Leucine-rich repeat and WD repeat-containing protein 1	Q9UFC0	LRWD1	0.598228	2.50961	1.55392	0.454661
LCQDLPCFSR	Histone acetyltransferase type B catalytic subunit	O14929	HAT1	0.272758	0.24238	0.257569	1.42599
LCQIPVHGASVPK	Latent-transforming growth factor beta-binding protein 1	Q14766	LTBP1		1.84285	1.84285
LCRPCQAAVEYYIK	Transmembrane protein 201	Q5SNT2	TMEM201	0.48816		0.48816
LCSGPGIVGNVLVDPSAR	Mannose-1-phosphate guanyltransferase beta	Q9Y5P6	GMPPB		-1.57655	-1.57655
LCSGVLGTVVHGK	Mitochondrial carrier homolog 2	Q9Y6C9	MTCH2	0.34273	0.649568	0.496149	0.719152
LCSSSSSDTSSR	Nuclear-interacting partner of ALK	Q86WB0	ZC3HC1	0.850273	0.445904	0.648088	0.715535
LCTQLEGLQSTVTGHVER	Enhancer of mRNA-decapping protein 4	Q6P2E9	EDC4	-1.34303		-1.34303
LCTSATESEVAR	Cytochrome b-c1 complex subunit 1, mitochondrial	P31930	UQCRC1	0.206801	-0.0886962	0.0590523	0.120367
LCTSVTESEVAR	Mitochondrial-processing peptidase subunit beta	O75439	PMPCB	-2.45644		-2.45644
LCVPAMNVNDSVTK	S-adenosylhomocysteine hydrolase-like protein 1	O43865	AHCYL1	-0.243521	0.0524516	-0.0955346	0.197187
LDDCGLTEAR	Ribonuclease inhibitor	P13489	RNH1	-1.98009		-1.98009
LDPDMAFCANIR	Procollagen-lysine,2-oxoglutarate 5-dioxygenase 1	Q02809	PLOD1	0.507446		0.507446
LDSSACLHAVGDK	Glutamine--fructose-6-phosphate aminotransferase [isomerizing] 2	O94808	GFPT2	0.0658326		0.0658326
LDTKYPYVCHAELNAIMNK	Deoxycytidylate deaminase	P32321	DCTD	0.497411		0.497411
LDVGNFSWGSECCTR	40S ribosomal protein S8	P62241	RPS8	0.113427		0.113427
LDVGNFSWGSECCTRK	40S ribosomal protein S8	P62241	RPS8	1.70079	1.35733	1.52906	1.14751
LECGGSAMEDK	Aldehyde dehydrogenase family 1 member A3	P47895	ALDH1A3	1.14431	1.45146	1.29788	1.12504
LECVEPNCR	60S ribosomal protein L36a	P83881	RPL36A	0.218148	0.317162	0.267655	0.933909
LELVLEAHRPICK	Fos-related antigen 1	P15407	FOSL1	-0.91059		-0.91059
LEPAGPACPEGGR	Conserved oligomeric Golgi complex subunit 8	Q96MW5	COG8	-0.796707	0.540065	-0.128321	0.055889
LESGSICK	Eukaryotic peptide chain release factor GTP-binding subunit ERF3A	P15170	GSPT1		-0.195454	-0.195454
LEVVPGCR	SAC3 domain-containing protein 1	A6NKF1	SAC3D1	1.32858		1.32858
LFCVGFTK	40S ribosomal protein S3a	P61247	RPS3A	-0.162111	-0.0709448	-0.116528	0.624555
LFDSICNNK	Guanine nucleotide-binding protein G(i) subunit alpha-2	P04899	GNAI2	-0.726974	1.15723	0.21513	0.0669796
LFEDDEHEKEQYCIR	A-kinase anchor protein 2	Q9Y2D5	AKAP2		1.58844	1.58844
LFFIQACR	Caspase-7	P55210	CASP7	-0.232048		-0.232048
LFQECCPHSTDR	Heterogeneous nuclear ribonucleoprotein K	P61978	HNRNPK	0.0642446	-0.066391	-0.0010732	0.00456622
LFSQFCNK	SET and MYND domain-containing protein 5	Q6GMV2	SMYD5		-1.82757	-1.82757
LFTCPTLETTNFK	Vacuolar protein sorting-associated protein 26C	O14972	VPS26C	-0.104075	0.414655	0.15529	0.182731
LFTESCSISPK	Testis-expressed protein 264	Q9Y6I9	TEX264	2.32297	0.960813	1.64189	0.601494
LFTIHQIDACTNNLPK	E3 ubiquitin-protein ligase SMURF2	Q9HAU4	SMURF2	0.7611		0.7611
LFVSGACDASAK	Guanine nucleotide-binding protein G(I)/G(S)/G(T) subunit beta-1	P62873	GNB1	-0.167556	0.230622	0.031533	0.045758
LFYEEDEAGSATSCL	Tumor necrosis factor receptor superfamily member 10D	Q9UBN6	TNFRSF10D		-1.60721	-1.60721
LGCFEIAK	Protein O-GlcNAcase	O60502	OGA	0.230787		0.230787
LGEWVGLCK	40S ribosomal protein S12	P25398	RPS12	-0.218979	-0.168136	-0.193557	1.08021
LGEWVGLCKIDR	40S ribosomal protein S12	P25398	RPS12	0.0738574	-0.297965	-0.112054	0.183969
LGGEVSCLVAGTK	Electron transfer flavoprotein subunit alpha, mitochondrial	P13804	ETFA	0.496178		0.496178
LGGTCVNVGCVPK	Glutathione reductase, mitochondrial	P00390	GSR	-0.169035	-0.0256047	-0.0973197	0.393302
LGIQGSYFCSQECFK	Methionine aminopeptidase 1	P53582	METAP1	-0.225093	0.273	0.0239533	0.027354
LGLDICSAK	Trans-3-hydroxy-L-proline dehydratase	Q96EM0	L3HYPDH		-0.0162044	-0.0162044
LGMGFGNCR	ADP-ribosylation factor GTPase-activating protein 3	Q9NP61	ARFGAP3		1.25697	1.25697
LGNNCVFAPADVTSEK	3-hydroxyacyl-CoA dehydrogenase type-2	Q99714	HSD17B10	-0.435839	0.511647	0.0379042	0.0226549
LGSISCK	Tyrosine--tRNA ligase, cytoplasmic	P54577	YARS1	0.316423	-0.169281	0.0735712	0.0900519
LGYTPVCR	Platelet-activating factor acetylhydrolase IB subunit gamma	Q15102	PAFAH1B3	0.157347		0.157347
LHCSMLAEDAIK	Iron-sulfur cluster assembly enzyme ISCU, mitochondrial	Q9H1K1	ISCU	-0.490418	-0.380233	-0.435325	1.09615
LHIVQVVCK	Chloride intracellular channel protein 1	O00299	CLIC1	0.0629192	-0.758786	-0.347934	0.257535
LHIVQVVCKK	Chloride intracellular channel protein 1	O00299	CLIC1	-2.74678		-2.74678
LHLDYIGPCK	SPARC	P09486	SPARC		0.893166	0.893166
LHPCVMASLR	All-trans-retinol 13,14-reductase	Q6NUM9	RETSAT	0.156204		0.156204
LHYCVSCAIHSK	40S ribosomal protein S26	P62854	RPS26	0.338406		0.338406
LIEMTAEYACTR	Complex I assembly factor ACAD9, mitochondrial	Q9H845	ACAD9	-0.796281		-0.796281
LIGPNCPGVINPGECK	Succinate--CoA ligase [ADP/GDP-forming] subunit alpha, mitochondrial	P53597	SUCLG1	0.696814	1.19066	0.943737	0.788038
LIIVEGCQR	Sodium/potassium-transporting ATPase subunit alpha-1	P05023	ATP1A1	-0.224304	0.839702	0.307699	0.176411
LIPDGCGVK	60S ribosomal protein L10	P27635	RPL10	0.314809	0.396566	0.355688	1.13759
LISETTSVCKPEQVAK	3-ketodihydrosphingosine reductase	Q06136	KDSR	-0.045384	0.160618	0.057617	0.170496
LITEDVQGKNCLTNFHGMDLTR	40S ribosomal protein S3a	P61247	RPS3A	0.203753	0.39238	0.298066	0.709758
LITIEINPDCAAITQR	Catechol O-methyltransferase	P21964	COMT		0.34938	0.34938
LITWSPVCR	Glutathione peroxidase 1	P07203	GPX1	0.529297	0.311394	0.420345	0.791946
LIVIGCGTSYHAAVATR	Glutamine--fructose-6-phosphate aminotransferase [isomerizing] 2	O94808	GFPT2	-0.348953	-0.0127342	-0.180844	0.321683
LKECMDMLR	Glutaminase kidney isoform, mitochondrial	O94925	GLS	0.0558686		0.0558686
LKEQCGCR	UDP-glucose 4-epimerase	Q14376	GALE	-0.18588		-0.18588
LKETCVSGEDPTQGADLSPDEK	A-kinase anchor protein 12	Q02952	AKAP12	0.310731	-0.161337	0.0746968	0.0942689
LKNCGCLGASPNLEQLQEENLK	Arginine--tRNA ligase, cytoplasmic	P54136	RARS1	1.87232		1.87232
LKPDPEPDDKNQEPSSCK	PSME3-interacting protein	Q9GZU8	PSME3IP1	-1.5085		-1.5085
LKVCALR	60S ribosomal protein L18	Q07020	RPL18	-0.42916		-0.42916
LLACIASRPGQCGR	40S ribosomal protein S8	P62241	RPS8	0.346618	0.490042	0.41833	0.966247
LLACIASRPGQCGRADGYVLEGK	40S ribosomal protein S8	P62241	RPS8	-0.457988		-0.457988
LLALTSSDLGCQPSRT	Transmembrane protein 192	Q8IY95	TMEM192		1.58485	1.58485
LLCGKETMVTSTTEPSR	Glucosidase 2 subunit beta	P14314	PRKCSH	-1.10341		-1.10341
LLCGLLAER	Macrophage migration inhibitory factor	P14174	MIF	-2.46976	-1.50236	-1.98606	0.817908
LLCPFER	F-box only protein 30	Q8TB52	FBXO30		-0.00795753	-0.00795753
LLDAVCLVPNK	Testis-expressed protein 30	Q5JUR7	TEX30	-0.551062		-0.551062
LLDIACWIHHK	Cathepsin D	P07339	CTSD	0.351814		0.351814
LLDLVQQSCNYK	NHP2-like protein 1	P55769	SNU13	-0.378042	-0.108261	-0.243151	0.491548
LLDRDACDTVR	Hsp70-binding protein 1	Q9NZL4	HSPBP1	-0.119228	-0.164081	-0.141655	1.00018
LLECPHLNVR	Importin-4	Q8TEX9	IPO4	2.02614	2.40347	2.21481	1.26681
LLEQAEAEGCQR	Tumor necrosis factor receptor superfamily member 10D	Q9UBN6	TNFRSF10D	0.437316	0.639535	0.538426	0.927484
LLETPYHCEAGAATDAEATEADGADGR	Protein adenylyltransferase SelO, mitochondrial	Q9BVL4	SELENOO	-1.60814		-1.60814
LLGGFQETCSK	Guanine nucleotide-binding protein-like 3	Q9BVP2	GNL3		0.74976	0.74976
LLGITPVCR	Probable arginine--tRNA ligase, mitochondrial	Q5T160	RARS2	1.23178		1.23178
LLGPCMDIMK	cAMP-dependent protein kinase type II-alpha regulatory subunit	P13861	PRKAR2A	-1.5155		-1.5155
LLGSTIPLCSAQWER	Carnitine O-palmitoyltransferase 1, liver isoform	P50416	CPT1A		0.628266	0.628266
LLHVFACACPGCSTGGAR	Programmed cell death protein 2-like	Q9BRP1	PDCD2L	-1.41779		-1.41779
LLLCAR	Protein-glutamine gamma-glutamyltransferase 2	P21980	TGM2	0.49165		0.49165
LLLCGGAPLSATTQR	Long-chain-fatty-acid--CoA ligase 3	O95573	ACSL3	1.77743	0.947609	1.36252	0.725423
LLLGNKCDMEAK	Ras-related protein Rab-13	P51153	RAB13	0.583399	0.646153	0.614776	1.4886
LLLPGWCHLTVEDGPR	Neurochondrin	Q9UBB6	NCDN		0.84268	0.84268
LLMEQESSACSR	Peroxisomal membrane protein 11B	O96011	PEX11B		0.843676	0.843676
LLMMAGIDDCYTSAR	40S ribosomal protein S2	P15880	RPS2		1.48221	1.48221
LLNWYGCVEGQQPIVR	Ubiquitin carboxyl-terminal hydrolase 4	Q13107	USP4		0.983259	0.983259
LLPCLHSACSACLGPAAPAAANSSGDGGAAGDGTVVDCPVCK	Transcription intermediary factor 1-beta	Q13263	TRIM28		1.26811	1.26811
LLPDDPYEKACQK	Glutathione S-transferase omega-1	P78417	GSTO1	-0.763065	-0.782297	-0.772681	2.10115
LLRDDEAHLQEDQGEEECFHDCSASFEEEPGADKVENK	Tetratricopeptide repeat protein 1	Q99614	TTC1	-0.24564		-0.24564
LLSALCPEEPPVHSSAQIVSK	Translation initiation factor eIF-2B subunit gamma	Q9NR50	EIF2B3	0.525819		0.525819
LLTECPPMMDTEYTK	Exportin-2	P55060	CSE1L	0.219362	0.224905	0.222133	2.10003
LLTFGCNK	Serine/threonine-protein kinase Nek9	Q8TD19	NEK9	0.0747309	-0.065853	0.00443896	0.0177963
LLTGDCQK	Glutamate-rich WD repeat-containing protein 1	Q9BQ67	GRWD1		0.989593	0.989593
LLVGNKCDLTTK	Ras-related protein Rab-1A	P62820	RAB1A		2.3725	2.3725
LLYCQR	Matrix metalloproteinase-14	P50281	MMP14		2.44363	2.44363
LMCSLCHCPGATIGCDVK	PHD finger protein 6	Q8IWS0	PHF6	0.281811	2.52711	1.40446	0.36724
LNCAEYK	Uncharacterized protein CXorf38	Q8TB03	CXorf38	-0.171179	0.594143	0.211482	0.168399
LNECVDHTPK	Glutathione S-transferase omega-1	P78417	GSTO1	-1.04464	-0.433201	-0.738922	0.602508
LNISFPATGCQK	40S ribosomal protein S6	P62753	RPS6	0.32216	0.50882	0.41549	0.851808
LNKCGVISPR	40S ribosomal protein S15a	P62244	RPS15A	0.251799	-0.277978	-0.01309	0.0138709
LNPAVTCAGK	Serine/threonine-protein kinase Nek9	Q8TD19	NEK9	0.699001	0.17859	0.438796	0.467559
LNQWCNVVR	Bifunctional glutamate/proline--tRNA ligase	P07814	EPRS1	0.0704713		0.0704713
LNVCSIAK	Stanniocalcin-1	P52823	STC1		1.30805	1.30805
LPADTCLLEFAR	Lysophosphatidylcholine acyltransferase 1	Q8NF37	LPCAT1		-0.106076	-0.106076
LPCIFICENNR	Pyruvate dehydrogenase E1 component subunit alpha, somatic form, mitochondrial	P08559	PDHA1	0.898324	0.00861259	0.453469	0.306364
LPCQPLVPGPELRPSAAELK	LIM domain-containing protein 1	Q9UGP4	LIMD1	0.489444	0.449083	0.469263	1.56288
LPEMAFSPDCPK	Ubiquitin-like modifier-activating enzyme ATG7	O95352	ATG7	1.99965	0.799651	1.39965	0.588684
LPLALPPASQGCSSGGGGGGSSAGGSGNSRPPR	Hsp70-binding protein 1	Q9NZL4	HSPBP1	-0.483198		-0.483198
LPLCSLPGEPGNGPDQQLQR	Ataxin-7-like protein 3B	Q96GX2	ATXN7L3B		-0.55458	-0.55458
LPLMECVQMTK	ATP-dependent 6-phosphofructokinase, liver type	P17858	PFKL	-0.143725		-0.143725
LPLMECVQMTQDVQK	ATP-dependent 6-phosphofructokinase, platelet type	Q01813	PFKP	0.39314	0.765842	0.579491	0.703174
LPLVTPHTQCR	26S proteasome regulatory subunit 4	P62191	PSMC1	4.17555		4.17555
LPPCQLLR	Ras and Rab interactor 1	Q13671	RIN1	0.0322694		0.0322694
LPSALTATACK	La-related protein 4B	Q92615	LARP4B		0.0107224	0.0107224
LQAANDSVCR	Biogenesis of lysosome-related organelles complex 1 subunit 5	Q8TDH9	BLOC1S5	0.427809		0.427809
LQAAQLPHTGVFGQSFSCPSDR	Macrosialin	P34810	CD68	-0.0545959	0.117924	0.031664	0.11012
LQDLSSCITQGK	Protein PML	P29590	PML	-0.189228	0.011805	-0.0887116	0.267877
LQEANAQLAEQACPHDVEMTPVQR	Lethal(2) giant larvae protein homolog 1	Q15334	LLGL1	1.98291		1.98291
LQELESCSGLGSTSDDTDVR	GTPase-activating protein and VPS9 domain-containing protein 1	Q14C86	GAPVD1		2.29554	2.29554
LQEVPHEGPMCDLLWSDPDDR	Serine/threonine-protein phosphatase 2A catalytic subunit beta isoform	P62714	PPP2CB		0.360271	0.360271
LQGATCNNNK	Cytoplasmic dynein 1 heavy chain 1	Q14204	DYNC1H1	-0.696231	-0.123757	-0.409994	0.411158
LQHINPLLPACLNK	Mini-chromosome maintenance complex-binding protein	Q9BTE3	MCMBP	0.7617	0.0918176	0.426759	0.373015
LQSGICHLFR	Aspartate--tRNA ligase, cytoplasmic	P14868	DARS1	-1.10747		-1.10747
LQSGTHCLWTDQLLQGSEK	Metalloproteinase inhibitor 1	P01033	TIMP1	1.1619		1.1619
LQVEGGGCSGFQYK	Iron-sulfur cluster assembly 2 homolog, mitochondrial	Q86U28	ISCA2	0.758031	-3.05122	-1.14659	0.183745
LQVSVDDQCEGSTEK	Tissue factor pathway inhibitor 2	P48307	TFPI2	0.294361	0.648432	0.471396	0.640714
LREIQPCLAESR	E3 ubiquitin-protein ligase BRE1B	O75150	RNF40		-0.679712	-0.679712
LRRECPSDECGAGVFMASHFDR	Ubiquitin-40S ribosomal protein S27a	P62979	RPS27A	0.489674		0.489674
LRSDCESQECVTK	LanC-like protein 2	Q9NS86	LANCL2	-0.760115	-0.0968482	-0.428482	0.377453
LSAPGCWAACTNFSR	Proteolipid protein 2	Q04941	PLP2	1.93836		1.93836
LSCFLCPVER	Rho family-interacting cell polarization regulator 1	Q6ZS17	RIPOR1		3.45229	3.45229
LSCMANSVIK	Telomere-associated protein RIF1	Q5UIP0	RIF1	0.191449	2.55956	1.37551	0.344409
LSEEAECPNPSTPSK	Serine/threonine-protein kinase 10	O94804	STK10		-0.656748	-0.656748
LSGCSQDCEDLK	Prolow-density lipoprotein receptor-related protein 1	Q07954	LRP1	4.14674	0.481901	2.31432	0.370236
LSHAVGCAFAACLER	Protein numb homolog	P49757	NUMB		1.73624	1.73624
LSKPCCYIFPGGR	Microtubule-associated protein 1B	P46821	MAP1B	0.683612		0.683612
LSLDGQNIYNACCTLR	Polypyrimidine tract-binding protein 1	P26599	PTBP1	0.943234		0.943234
LSTCLLSAPSGIQR	Rho guanine nucleotide exchange factor 40	Q8TER5	ARHGEF40	0.406935	0.833001	0.619968	0.676319
LTAVCMECFR	Thymidine kinase, cytosolic	P04183	TK1	0.518564		0.518564
LTCLFQIK	Ubiquitin-protein ligase E3C	Q15386	UBE3C	2.89152		2.89152
LTDFGLCK	Ribosomal protein S6 kinase beta-1	P23443	RPS6KB1	-0.840368	-1.17078	-1.00557	0.984368
LTEGCSFR	40S ribosomal protein S27	P42677	RPS27	0.254094		0.254094
LTFSCLGGSDNFK	Prostaglandin E synthase 3	Q15185	PTGES3	-0.0354315		-0.0354315
LTGAGGGGCGITLLKPGLEQPEVEATK	Mevalonate kinase	Q03426	MVK	0.365713		0.365713
LTGIKHELQANCYEEVKDR	Cofilin-1	P23528	CFL1	-0.917328		-0.917328
LTHAAPCMLFMK	Glutaredoxin-3	O76003	GLRX3	-0.544588		-0.544588
LTLSCEEFVK	Persulfide dioxygenase ETHE1, mitochondrial	O95571	ETHE1	0.328044	0.489231	0.408637	0.906697
LTSCATNASICGDEAR	Prolow-density lipoprotein receptor-related protein 1	Q07954	LRP1		3.49234	3.49234
LVEALCAAGHR	Thymidylate kinase	P23919	DTYMK		-0.470073	-0.470073
LVEALCAEHQINLIK	40S ribosomal protein S12	P25398	RPS12	-0.308308	-0.428573	-0.368441	0.98719
LVFLACCVAPTNPR	DNA replication licensing factor MCM6	Q14566	MCM6	-0.0245106	0.0707939	0.0231417	0.147404
LVHDMNHPPSGEYFGQCGGCGEDVVGDGAGVVALDR	Thyroid receptor-interacting protein 6	Q15654	TRIP6		1.58959	1.58959
LVHSGSGCR	Beta-2-syntrophin	Q13425	SNTB2	2.13502	0.560731	1.34787	0.473023
LVILANNCPALR	60S ribosomal protein L30	P62888	RPL30	-0.9353	-0.275993	-0.605646	0.498493
LVIPASQCGSLIGK	Poly(rC)-binding protein 4	P57723	PCBP4	0.775134	0.625933	0.700533	1.17044
LVIVGDGACGK	Transforming protein RhoA	P61586	RHOA	0.188704	-0.0631105	0.0627966	0.151523
LVNKCALDFFR	NADH dehydrogenase [ubiquinone] 1 alpha subcomplex subunit 8	P51970	NDUFA8	0.615713	0.135505	0.375609	0.441181
LVPCILEAAK	Protein SAAL1	Q96ER3	SAAL1	0.917268		0.917268
LVVPASQCGSLIGK	Poly(rC)-binding protein 2	Q15366	PCBP2	0.0884434	-0.28907	-0.100313	0.161767
LVVPATQCGSLIGK	Poly(rC)-binding protein 1	Q15365	PCBP1	-0.195758	-0.322324	-0.259041	0.816627
LVVPATQCGSLIGKGGCK	Poly(rC)-binding protein 1	Q15365	PCBP1	1.0374		1.0374
LWADHGVQACFGR	Guanine nucleotide-binding protein G(i) subunit alpha-2	P04899	GNAI2	-0.0168905	1.85239	0.917748	0.296017
LWNEWCR	Proteasome assembly chaperone 1	O95456	PSMG1	-0.0274551		-0.0274551
LWNTLGVCK	Receptor of activated protein C kinase 1	P63244	RACK1	0.382632	0.112411	0.247522	0.49745
LYLDELEGGGNPGASCK	Golgi-associated PDZ and coiled-coil motif-containing protein	Q9HD26	GOPC		-1.17117	-1.17117
LYYFQYPCYQEGLR	DNA dC->dU-editing enzyme APOBEC-3C	Q9NRW3	APOBEC3C		0.00958248	0.00958248
MACGLGGK	Importin-5	O00410	IPO5	-0.217592	0.418353	0.100381	0.0940267
MADCGGLPQISQPAK	Protein NDRG1	Q92597	NDRG1		-0.217615	-0.217615
MADCGGLPQVVQPGK	Protein NDRG3	Q9UGV2	NDRG3	-0.917225	-0.110543	-0.513884	0.372999
MAPDHEKACIACR	DnaJ homolog subfamily C member 7	Q99615	DNAJC7	-0.211618		-0.211618
MCEDLWR	UDP-glucose 4-epimerase	Q14376	GALE		0.24509	0.24509
MDCLLLQHLK	Actin-related protein 8	Q9H981	ACTR8	1.66339		1.66339
MDPNCSCAAGDSCTCAGSCK	Metallothionein-2	P02795	MT2A	0.722565	0.873057	0.797811	1.22282
MDPNCSCSPVGSCACAGSCK	Metallothionein-1X	P80297	MT1X	-0.112762	-0.279149	-0.195955	0.592443
MDRTCEERPAEDGSDEEDPDSMEAPTR	WD repeat-containing protein 55	Q9H6Y2	WDR55	1.41175	-0.245092	0.583331	0.215075
MEAPSGSEPGGDGAGDCAHPDPR	Phosphatidylinositol 3,4,5-trisphosphate-dependent Rac exchanger 1 protein	Q8TCU6	PREX1	1.67001		1.67001
MEEELQHSHCVNCVSR	F-box only protein 30	Q8TB52	FBXO30	0.470553		0.470553
MEEVPHDCPGADSAQAGR	Cytosolic Fe-S cluster assembly factor NUBP1	P53384	NUBP1	1.44062		1.44062
MEGPGLGSQCR	Palmitoyltransferase ZDHHC13	Q8IUH4	ZDHHC13	0.364182		0.364182
MEIEVSVAECK	A-kinase anchor protein 2	Q9Y2D5	AKAP2		-1.63151	-1.63151
MEPCYTK	Protein Niban 1	Q9BZQ8	NIBAN1	0.453455	0.902093	0.677774	0.69149
MEPLNNVCAK	Chloride channel CLIC-like protein 1	Q96S66	CLCC1	0.693868	0.703672	0.69877	2.35008
MEPVGCCGECR	F-box only protein 22	Q8NEZ5	FBXO22	0.587657	1.1955	0.891577	0.679549
MFEDSQDSCR	Nuclear autoantigen Sp-100	P23497	SP100	-0.170541		-0.170541
MGITEYNNQCR	Isoleucine--tRNA ligase, cytoplasmic	P41252	IARS1		0.547803	0.547803
MIEVVCNDR	Ubiquitin-like protein 5	Q9BZL1	UBL5	-2.17894		-2.17894
MKGCPVNTEPSGPTCEK	Cytochrome c-type heme lyase	P53701	HCCS	1.0601		1.0601
MKLNISFPATGCQK	40S ribosomal protein S6	P62753	RPS6	-0.0384087		-0.0384087
MKVELCSFSGYK	60S ribosomal protein L24	P83731	RPL24	0.380868	1.35515	0.868008	0.487348
MLGETCADCGTILLQDK	Protein ZNRD2	O60232	ZNRD2	-0.0792106	-0.6157	-0.347455	0.378257
MLNYSAPSAGGCLLDRK	mRNA decay activator protein ZFP36L1	Q07352	ZFP36L1	0.817115		0.817115
MLPDKDCR	Cofilin-1	P23528	CFL1	-0.564121	-0.519484	-0.541803	1.58154
MLQDCPK	MAP kinase-activated protein kinase 2	P49137	MAPKAPK2		1.5219	1.5219
MLQPCGPPADKPEEN	Splicing factor 3B subunit 5	Q9BWJ5	SF3B5	0.614864	-0.33592	0.139472	0.0870742
MLSCAGADR	60S ribosomal protein L10	P27635	RPL10	0.277795	0.494036	0.385915	0.759698
MLSSGVCTSTVQLPGK	Retinol dehydrogenase 11	Q8TC12	RDH11	0.643062	0.429833	0.536448	0.903453
MLVQCMQDQEHPSIR	Importin-5	O00410	IPO5	2.37733		2.37733
MMCGAPSATQPATAETQHIADQVR	Cystatin-B	P04080	CSTB	0.285347	0.186071	0.235709	0.878985
MMPECQCPPHMTGPR	Prolow-density lipoprotein receptor-related protein 1	Q07954	LRP1	0.147182	1.08597	0.616575	0.382747
MMQICDTYNQK	Mid1-interacting protein 1	Q9NPA3	MID1IP1	0.751101		0.751101
MPCQLHQVIVAR	Calpain-2 catalytic subunit	P17655	CAPN2	-0.169721		-0.169721
MPCQSLQPEPINTPTHTK	Proliferation marker protein Ki-67	P46013	MKI67		-1.4827	-1.4827
MREIVHIQAGQCGNQIGTK	Tubulin beta-6 chain	Q9BUF5	TUBB6	0.774024		0.774024
MREIVHLQAGQCGNQIGAK	Tubulin beta-4B chain	P68371	TUBB4B	0.252572	0.39453	0.323551	0.861757
MVIYCDQTCQK	Ankyrin repeat and MYND domain-containing protein 2	Q8IV38	ANKMY2	-0.22201		-0.22201
NACIECSVNQNSIR	Ataxin-10	Q9UBB4	ATXN10	-1.28912	-0.084227	-0.686674	0.338694
NADCSSGPGQR	Cancer-related nucleoside-triphosphatase	Q9BSD7	NTPCR	1.99473		1.99473
NADMSEEMQQDSVECATQALEK	Dynein light chain 1, cytoplasmic	P63167	DYNLL1	0.766174	0.0999761	0.433075	0.379452
NALANPLYCPDYR	Cytochrome b-c1 complex subunit 2, mitochondrial	P22695	UQCRC2	-0.125777	0.695438	0.284831	0.211897
NALANQSDCVLHR	Anaphase-promoting complex subunit 7	Q9UJX3	ANAPC7	-1.48332	-0.558261	-1.02079	0.567285
NALVSHLDGTTPVCEDIGR	Cytochrome b-c1 complex subunit 1, mitochondrial	P31930	UQCRC1	0.290337	1.96732	1.12883	0.390704
NAQLDCSKLETLGIGQR	Methionine adenosyltransferase 2 subunit beta	Q9NZL9	MAT2B	0.390008		0.390008
NARPSICPNSGFMEQLR	Dual specificity protein phosphatase 19	Q8WTR2	DUSP19	1.03995		1.03995
NAWADNANACAK	Phosphatidylinositide phosphatase SAC1	Q9NTJ5	SACM1L		2.95614	2.95614
NCAVSCAGEK	Tubulin-specific chaperone E	Q15813	TBCE		0.0871226	0.0871226
NCDFSFTGLQHVTDK	Probable tRNA N6-adenosine threonylcarbamoyltransferase, mitochondrial	Q9H4B0	OSGEPL1	-0.402618		-0.402618
NCGCLGASPNLEQLQEENLK	Arginine--tRNA ligase, cytoplasmic	P54136	RARS1	0.726129	0.400812	0.563471	0.747363
NCIVLIDSTPYR	40S ribosomal protein S8	P62241	RPS8	0.305005	0.310252	0.307628	2.26528
NCLNPQFSK	Copine-3	O75131	CPNE3	-1.2871	0.581021	-0.353039	0.113538
NCLTNFHGMDLTR	40S ribosomal protein S3a	P61247	RPS3A	0.146568	0.0847032	0.115635	0.778851
NCPHVVVGTPGR	ATP-dependent RNA helicase DDX39A	O00148	DDX39A	1.38403	0.844462	1.11425	0.820364
NCQTLVNLCSR	Neurogenic locus notch homolog protein 2	Q04721	NOTCH2	1.92744	0.254341	1.09089	0.38041
NCSSFLIK	60S ribosomal protein L28	P46779	RPL28	-0.971867	-0.830066	-0.900966	1.30107
NCSSFLIKR	60S ribosomal protein L28	P46779	RPL28	0.155661	-0.134067	0.0107969	0.0210714
NCSSPEFSK	Copine-1	Q99829	CPNE1	0.051396	0.324428	0.187912	0.397964
NCTAGAVYTYHEK	Nitric oxide synthase-interacting protein	Q9Y314	NOSIP		-0.774079	-0.774079
NCTCGLAEELEK	Anamorsin	Q6FI81	CIAPIN1		-0.740418	-0.740418
NCWQNYLDFHR	Cytochrome c oxidase subunit 6B1	P14854	COX6B1	1.05546	1.68244	1.36895	0.843712
NCYPSPLNYYNFPK	Methionine aminopeptidase 1	P53582	METAP1		-0.235492	-0.235492
NDIFEDAGILCQR	Exocyst complex component 5	O00471	EXOC5		1.2414	1.2414
NDPYHPDHFNCANCGK	LIM and senescent cell antigen-like-containing domain protein 1	P48059	LIMS1	-1.47424	0.388792	-0.542723	0.177731
NEAIQAAHDAVAQEGQCR	Ubiquitin carboxyl-terminal hydrolase isozyme L1	P09936	UCHL1	-0.151972	-0.0910941	-0.121533	0.806229
NEDACR	Synaptogyrin-2	O43760	SYNGR2	3.71701		3.71701
NEDFAAHPGEDAVPTGPDCQAK	A-kinase anchor protein 12	Q02952	AKAP12	-1.35889		-1.35889
NFILDQCNVYNSGQR	Heterogeneous nuclear ribonucleoprotein U-like protein 2	Q1KMD3	HNRNPUL2	-2.21335		-2.21335
NGDICETSGKPK	Survival motor neuron protein	Q16637	SMN1	-0.369275	0.421525	0.026125	0.0186354
NGLGNQLSSGSHTSAASQCDSASSR	Threonylcarbamoyladenosine tRNA methylthiotransferase	Q5VV42	CDKAL1		0.103796	0.103796
NHCGIASAASYPTV	Cathepsin L1	P07711	CTSL	-0.848648		-0.848648
NHEAGTSGCGIDAK	Centrosomal protein of 170 kDa	Q5SW79	CEP170		0.00185295	0.00185295
NHIENQDECVLNVISHAR	39S ribosomal protein L37, mitochondrial	Q9BZE1	MRPL37		1.09643	1.09643
NHLLPDIVTCVQSSR	Cancer-related nucleoside-triphosphatase	Q9BSD7	NTPCR		0.40488	0.40488
NIAFFSTNCVEGTAR	Sodium/potassium-transporting ATPase subunit alpha-1	P05023	ATP1A1	1.64378	0.583136	1.11346	0.548253
NINCSIEESFQR	Hydroxymethylglutaryl-CoA lyase, mitochondrial	P35914	HMGCL	0.905389	-0.156931	0.374229	0.215197
NINDAWVCTNDMFR	Nuclear transport factor 2	P61970	NUTF2		4.62259	4.62259
NITWTLSNLCR	Importin subunit alpha-8	A9QM74	KPNA7		1.78414	1.78414
NIVAVGAGFCDGLR	Glycerol-3-phosphate dehydrogenase 1-like protein	Q8N335	GPD1L		2.45868	2.45868
NIVSDCSAFVK	Long-chain-fatty-acid--CoA ligase 1	P33121	ACSL1	2.06651	2.9173	2.4919	0.968024
NLDSTTVAVHGEEIYCK	Cysteine and glycine-rich protein 1	P21291	CSRP1		-0.234207	-0.234207
NLEAVETLGSTSTICSDKTGTLTQNR	Sodium/potassium-transporting ATPase subunit alpha-1	P05023	ATP1A1	0.315595	0.340724	0.328159	1.61326
NLFEDQNTLTSICEK	Exportin-2	P55060	CSE1L	0.0294449	0.731786	0.380616	0.323857
NLLCGFYGR	DNA dC->dU-editing enzyme APOBEC-3B	Q9UH17	APOBEC3B	-0.686807		-0.686807
NLSGQPNFPCR	Transmembrane 9 superfamily member 3	Q9HD45	TM9SF3	0.23072	0.486664	0.358692	0.661209
NMACVQR	Transgelin-2	P37802	TAGLN2	-0.265381	-0.325032	-0.295206	1.19313
NMAPGAVCSPGESK	182 kDa tankyrase-1-binding protein	Q9C0C2	TNKS1BP1	0.0290953		0.0290953
NMMAACDPR	Tubulin beta-4B chain	P68371	TUBB4B	0.173329	0.532879	0.353104	0.52317
NMSVHLSPCFR	40S ribosomal protein S11	P62280	RPS11	0.458896	0.692934	0.575915	0.894095
NMVHPNVICDGCNGPVVGTR	Sequestosome-1	Q13501	SQSTM1	1.5458	0.259639	0.90272	0.404438
NNLKDCGLF	Guanine nucleotide-binding protein G(i) subunit alpha-2	P04899	GNAI2	0.0789143	0.089063	0.0839887	1.41549
NNLKECGLY	Guanine nucleotide-binding protein G(i) subunit alpha	P08754	GNAI3	0.10235	0.144615	0.123482	0.96696
NNMNCEAR	Protein Njmu-R1	Q9HAS0	C17orf75	1.05215	-5.40045	-2.17415	0.205863
NNPAIVIIGNNGQIHYDHQNDGASQALASCQR	Protein ERGIC-53	P49257	LMAN1	1.35497	0.60342	0.979193	0.632133
NNTQVLINCR	Small nuclear ribonucleoprotein Sm D2	P62316	SNRPD2		2.16143	2.16143
NPGSTNHIPFLEESPCGSQISSEHSVIKPPLGDSPGSLSR	WD repeat-containing protein 47	O94967	WDR47	0.352822		0.352822
NPMDYPVEDAFCKPQLVK	Retinoic acid-induced protein 3	Q8NFJ5	GPRC5A	1.32086		1.32086
NPVCANR	DNA replication licensing factor MCM6	Q14566	MCM6	-0.161981	0.615834	0.226927	0.178002
NPVHCFDLASLDPR	Ribosomal RNA-processing protein 8	O43159	RRP8	1.35528		1.35528
NQALFPACVLK	ATP-dependent RNA helicase DDX1	Q92499	DDX1	2.60285	-1.50062	0.551119	0.0793863
NQDDFECVTTLEGHENEVK	Probable cytosolic iron-sulfur protein assembly protein CIAO1	O76071	CIAO1	0.307789	-0.931359	-0.311785	0.152926
NQGCQLPGSSHSFQGPNLVTGK	RNA polymerase II-associated protein 1	Q9BWH6	RPAP1		1.92509	1.92509
NQLTSLPSAICK	Protein flightless-1 homolog	Q13045	FLII		4.20927	4.20927
NQSFCPTVNLDK	60S ribosomal protein L27a	P46776	RPL27A	-0.171941	0.464861	0.14646	0.139341
NQVDSETHCHAER	DNA dC->dU-editing enzyme APOBEC-3C	Q9NRW3	APOBEC3C	0.573247	-0.0558015	0.258723	0.250437
NRIENRFPDEATCMGFCAPK	Tissue factor pathway inhibitor 2	P48307	TFPI2		0.758056	0.758056
NSLVDKPFAAKEDQLLCTDCYSNEYSSK	Four and a half LIM domains protein 2	Q14192	FHL2	-0.104087	-1.03272	-0.568404	0.360462
NSNVDSSYLESLYQSCPR	Zinc finger CCCH-type antiviral protein 1	Q7Z2W4	ZC3HAV1	0.536785	0.0189803	0.277882	0.321028
NSPEDLGLSLTGDSCK	TP53-binding protein 1	Q12888	TP53BP1	-1.17152	-2.93448	-2.053	0.588065
NSPSLFPCAPLCER	ERBB receptor feedback inhibitor 1	Q9UJM3	ERRFI1	0.149651		0.149651
NSQDIICSNAGTCHCGR	Integrin beta-like protein 1	O95965	ITGBL1	-1.46548		-1.46548
NSSQETCTR	Glutamine-dependent NAD(+) synthetase	Q6IA69	NADSYN1	1.78057		1.78057
NTAAMVCSLENRDECLMCGS	Ribonucleoside-diphosphate reductase large subunit	P23921	RRM1	-0.0878303		-0.0878303
NTCTSVYTK	DNA-dependent protein kinase catalytic subunit	P78527	PRKDC	0.315128		0.315128
NTGIICTIGPASR	Pyruvate kinase PKM	P14618	PKM	-0.557611	-0.0506927	-0.304152	0.354299
NTGSCQEAAAK	Serine palmitoyltransferase 2	O15270	SPTLC2	5.25978		5.25978
NTLANSCGTGIR	Nucleus accumbens-associated protein 1	Q96RE7	NACC1	-0.581806	-1.82845	-1.20513	0.517299
NTMEALPACLLR	Thymidine kinase, cytosolic	P04183	TK1		1.253	1.253
NTWDCGLQILKK	Tricarboxylate transport protein, mitochondrial	P53007	SLC25A1	0.390107		0.390107
NVCEQGTSTVDQNFGK	TP53-binding protein 1	Q12888	TP53BP1	1.18959	0.22945	0.709521	0.421708
NVCTEAGMFAIR	26S proteasome regulatory subunit 10B	P62333	PSMC6	-1.11482		-1.11482
NVGTGLVGAPACGDVMK	Iron-sulfur cluster assembly enzyme ISCU, mitochondrial	Q9H1K1	ISCU	-0.259346	-0.109666	-0.184506	0.61027
NVIETCK	Sterol-4-alpha-carboxylate 3-dehydrogenase, decarboxylating	Q15738	NSDHL	1.02545	-0.322815	0.351315	0.158542
NVNQCLGPGK	Very low-density lipoprotein receptor	P98155	VLDLR		-0.420273	-0.420273
NVPHEDICEDSDIDGDYR	Importin subunit alpha-3	O00629	KPNA4	-2.123		-2.123
NVVTIFSAPNYCYR	Serine/threonine-protein phosphatase 2A catalytic subunit beta isoform	P62714	PPP2CB		-1.57173	-1.57173
NYLEPGKECVQPATK	Sarcoplasmic/endoplasmic reticulum calcium ATPase 2	P16615	ATP2A2	0.368434		0.368434
PAPPCASCHAAR	Cytoplasmic tRNA 2-thiolation protein 1	Q7Z7A3	CTU1		1.92518	1.92518
PEEGSGCSVR	CD70 antigen	P32970	CD70	3.95878	1.18121	2.56999	0.501138
PKHEFSVDMTCGGCAEAVSR	Copper transport protein ATOX1	O00244	ATOX1	0.461888	0.0477061	0.254797	0.362031
PVAVGPYGQSQPSCFDR	Reactive oxygen species modulator 1	P60602	ROMO1	2.05362		2.05362
QAAECGPEPGVSGVGELIVR	Retinol dehydrogenase 14	Q9HBH5	RDH14	0.0265203	2.27729	1.1519	0.307517
QAHLCVLASNCDEPMYVK	40S ribosomal protein S12	P25398	RPS12	-0.237223	-0.433597	-0.33541	0.741608
QATVVLNCVGPYR	Saccharopine dehydrogenase-like oxidoreductase	Q8NBX0	SCCPDH	0.154934	0.383963	0.269449	0.592038
QAYEPCLER	Unconventional myosin-Ib	O43795	MYO1B	-0.946609		-0.946609
QCVPFR	60S ribosomal protein L17	P18621	RPL17	0.838117	0.947189	0.892653	1.41066
QDLADVVQVCEGK	Cytoplasmic dynein 1 heavy chain 1	Q14204	DYNC1H1	-0.072684	-0.289143	-0.180913	0.464432
QDVDLCLVSSCEYKHPK	Microtubule-associated protein 1B	P46821	MAP1B	0.367745		0.367745
QEATFCSQR	Anillin	Q9NQW6	ANLN		0.155626	0.155626
QEVPMCTGPEAR	Constitutive coactivator of peroxisome proliferator-activated receptor gamma	Q96EK7	FAM120B	0.373672		0.373672
QEVPMCTGPESR	Constitutive coactivator of peroxisome proliferator-activated receptor gamma	Q96EK7	FAM120B	-0.718897		-0.718897
QFLECAQNQGDIK	Coiled-coil-helix-coiled-coil-helix domain-containing protein 2	Q9Y6H1	CHCHD2	0.654352	0.259238	0.456795	0.585254
QGFGNLPICMAK	C-1-tetrahydrofolate synthase, cytoplasmic	P11586	MTHFD1	-0.236951	0.34694	0.0549947	0.054794
QGRPIILCSKDDTESSK	Glutamine--fructose-6-phosphate aminotransferase [isomerizing] 2	O94808	GFPT2	-2.86902	-0.431213	-1.65012	0.392516
QGRPVVICDKEDTETIK	Glutamine--fructose-6-phosphate aminotransferase [isomerizing] 1	Q06210	GFPT1		2.10145	2.10145
QICSCDGLTIWEER	Copper chaperone for superoxide dismutase	O14618	CCS	-0.697092		-0.697092
QKFDNLYCCR	S-adenosylhomocysteine hydrolase-like protein 1	O43865	AHCYL1	-1.34518	-1.74917	-1.54717	1.08276
QLPEPLLASSGHC	CCAAT/enhancer-binding protein beta	P17676	CEBPB	-0.651086		-0.651086
QLPSLACKYPVSSR	Lamina-associated polypeptide 2, isoform alpha	P42166	TMPO	-0.494929		-0.494929
QLVTNACLIK	Protein arginine N-methyltransferase 1	Q99873	PRMT1	-0.257541	-0.122488	-0.190015	0.662788
QMEKDETVSDCSPHIANIGR	F-actin-capping protein subunit beta	P47756	CAPZB		0.302602	0.302602
QMSCLMEALEDKR	Golgi apparatus protein 1	Q92896	GLG1	0.00147778		0.00147778
QNCADQIEVVFR	39S ribosomal protein S30, mitochondrial	Q9NP92	MRPS30		-1.02442	-1.02442
QNFIDPLQNLCEK	Endophilin-A2	Q99961	SH3GL1		-0.180095	-0.180095
QNSVQEQPGTACLSK	Anillin	Q9NQW6	ANLN		-0.264706	-0.264706
QNVAVNELCGR	Zyxin	Q15942	ZYX		2.89523	2.89523
QPAIMPGQSYGLEDGSCSYKDFSESR	Heterogeneous nuclear ribonucleoprotein L	P14866	HNRNPL	1.05814	0.263878	0.661009	0.46292
QPEVTNPCDR	Prolow-density lipoprotein receptor-related protein 1	Q07954	LRP1	0.802378	0.420977	0.611677	0.715802
QPTVTSVCSETSQELAEGQR	PDZ and LIM domain protein 5	Q96HC4	PDLIM5		-0.894897	-0.894897
QQICNQQPPCSR	Zinc finger CCCH-type antiviral protein 1	Q7Z2W4	ZC3HAV1		-0.0937938	-0.0937938
QRPASLVVADFGCGDCR	Ribosomal RNA-processing protein 8	O43159	RRP8	-0.535733		-0.535733
QSLLFCPK	OCIA domain-containing protein 2	Q56VL3	OCIAD2	0.507794	0.558864	0.533329	1.51631
QTIGNSCGTIGLIHAVANNQDK	Ubiquitin carboxyl-terminal hydrolase isozyme L1	P09936	UCHL1	-0.120592		-0.120592
QTNGCLNGYTPSR	Uridine-cytidine kinase 2	Q9BZX2	UCK2	3.31411	0.0694462	1.69178	0.312773
QVHQCIER	Protein FAM136A	Q96C01	FAM136A	0.917119	1.63038	1.27375	0.759967
QVLIRPCSK	40S ribosomal protein S15a	P62244	RPS15A	-0.182492	0.0165041	-0.0829939	0.253819
QVLVAPGNAGTACSEK	Trifunctional purine biosynthetic protein adenosine-3	P22102	GART	0.160304	-0.59708	-0.218388	0.175886
QVTSAEECK	Transportin-3	Q9Y5L0	TNPO3	1.50792		1.50792
QVVDCQLADVNNIGK	Cytosol aminopeptidase	P28838	LAP3	-0.699939	-0.395428	-0.547683	0.762906
QWCNCAFLESSAK	Ras-related protein Rap-1A	P62834	RAP1A		-0.00798485	-0.00798485
QWNNCAFLESSAK	Ras-related protein Rap-1b	P61224	RAP1B	0.123718	0.0280334	0.0758756	0.445943
QYEMGECTR	Splicing factor U2AF 35 kDa subunit-like protein	P0DN76	U2AF1L5		0.222307	0.222307
QYGFCK	Alpha-2-HS-glycoprotein	P02765	AHSG	0.0935883	0.103829	0.0987089	1.48154
QYLPGNEQGVACSGSDPSWK	Probable cytosolic iron-sulfur protein assembly protein CIAO1	O76071	CIAO1	-1.77887	0.0500569	-0.864405	0.285746
RAACQEAQVFGNQLIPPNAQVK	Acylglycerol kinase, mitochondrial	Q53H12	AGK	1.66761	0.967675	1.31764	0.781801
RACAAGTPAVIR	Host cell factor 1	P51610	HCFC1	-2.18308	-1.62115	-1.90211	1.02984
RACYGVLR	40S ribosomal protein S3	P23396	RPS3		0.689649	0.689649
RAPTCSLDGALPLGAQIPAVHR	FH1/FH2 domain-containing protein 1	Q9Y613	FHOD1	0.989029	0.575745	0.782387	0.784129
RAYCEGCYVATLEK	Thyroid receptor-interacting protein 6	Q15654	TRIP6	1.08369		1.08369
RECPSDECGAGVFMASHFDR	Ubiquitin-40S ribosomal protein S27a	P62979	RPS27A	0.409594	2.11034	1.25996	0.422558
REDCLPYAATVLR	Tubulin-specific chaperone D	Q9BTW9	TBCD		2.16869	2.16869
RFSFCCSPEPEAEAEAAAGPGPCER	Sequestosome-1	Q13501	SQSTM1	0.32654	-0.229832	0.0483537	0.0503959
RGCLEGSQGTQALHK	Nuclear receptor 2C2-associated protein	Q86WQ0	NR2C2AP		-1.926	-1.926
RGGGDEESGEHTQVPADSPDSQEEQKGESSASSPEEPEEITCLEK	A-kinase anchor protein 12	Q02952	AKAP12		0.357409	0.357409
RGPCIIYNEDNGIIK	60S ribosomal protein L4	P36578	RPL4	0.264219	0.37476	0.319489	0.962359
RGPCWCVDR	Insulin-like growth factor-binding protein 6	P24592	IGFBP6	0.744905		0.744905
RLDSSACLHAVGDK	Glutamine--fructose-6-phosphate aminotransferase [isomerizing] 2	O94808	GFPT2	0.745655	0.986777	0.866216	1.05532
RLIPDGCGVK	60S ribosomal protein L10	P27635	RPL10	0.938555		0.938555
RPCEQISPEEEER	Fos-related antigen 1	P15407	FOSL1	-0.810676		-0.810676
RPCPFWNDISQCGR	ERO1-like protein alpha	Q96HE7	ERO1A	-1.4453		-1.4453
RPCTLSELE	Prolyl 4-hydroxylase subunit alpha-1	P13674	P4HA1	1.28026		1.28026
RPTEICADPQFIIGGATR	Calpain-2 catalytic subunit	P17655	CAPN2	-0.840454	0.447205	-0.196625	0.0908161
RPVFPPLCGDGLLSGKEETR	RNA-binding protein PNO1	Q9NRX1	PNO1	1.67982		1.67982
RQCLECGLFTCK	Melanophilin	Q9BV36	MLPH	-0.817716	0.388523	-0.214597	0.106584
RSIQFVDWCPTGFK	Tubulin alpha-4A chain	P68366	TUBA4A	0.330904		0.330904
RYDVVADCSDNVPTR	Adenylyltransferase and sulfurtransferase MOCS3	O95396	MOCS3		-1.48332	-1.48332
RYPNVFGIGDCTNLPTSK	Sulfide:quinone oxidoreductase, mitochondrial	Q9Y6N5	SQOR	1.24167		1.24167
SACGNCYLGDAFR	Anamorsin	Q6FI81	CIAPIN1	-0.0846302	0.249028	0.0821989	0.149627
SACGVCPGR	60S ribosomal protein L34	P49207	RPL34	-0.125796	-0.0649691	-0.0953827	0.706629
SADLQTNGCVTTARPVPK	Arsenite methyltransferase	Q9HBK9	AS3MT		0.439938	0.439938
SAGACTAAAFLK	Cytosol aminopeptidase	P28838	LAP3	0.118035	0.642241	0.380138	0.415342
SAGVQCFGPTAEAAQLESSKR	Trifunctional purine biosynthetic protein adenosine-3	P22102	GART	0.326157		0.326157
SAPCGSLAFSGDR	Microtubule-associated protein 1A	P78559	MAP1A	0.290757	0.668643	0.4797	0.621838
SAPPCANSTVGVVK	C2 domain-containing protein 5	Q86YS7	C2CD5		0.240983	0.240983
SAQPSPHYMAAPSSGQIYGSGPQGYNTQPVPVSGQCPPPSTR	Lipoma-preferred partner	Q93052	LPP	2.01152	0.882347	1.44693	0.625547
SASASPLTPCSVTR	MAP7 domain-containing protein 1	Q3KQU3	MAP7D1	-0.0415378	0.0374588	-0.0020395	0.0145029
SASPCIADK	Tyrosine-protein phosphatase non-receptor type 12	Q05209	PTPN12	-1.36928	-1.34802	-1.35865	2.30253
SASVAPFTCK	Nuclear pore complex protein Nup153	P49790	NUP153		-0.470489	-0.470489
SATVKPGAVGAGEFVSPCESGDNTGEPSALEEQR	TP53-binding protein 1	Q12888	TP53BP1	-0.27748	2.39844	1.06048	0.241599
SAVLCYSPSDR	Ankyrin repeat and LEM domain-containing protein 2	Q86XL3	ANKLE2	-0.358125		-0.358125
SAYGFHTASSCFWDTTSDGTCTVR	Dynein light chain Tctex-type 3	P51808	DYNLT3	-0.611343		-0.611343
SCAGISGK	ER lumen protein-retaining receptor 1	P24390	KDELR1	0.026596	0.0610173	0.0438067	0.622841
SCCSCCPVGCAK	Metallothionein-2	P02795	MT2A	-0.0756076	0.771432	0.347912	0.250112
SCCSCCPVGCSK	Metallothionein-1F	P04733	MT1F	0.0141797		0.0141797
SCCTSVNEVICHGIPDR	Methionine aminopeptidase 1	P53582	METAP1	0.187483	0.379221	0.283352	0.68257
SCEGQNPELLPK	Anillin	Q9NQW6	ANLN	-0.134571	-0.354205	-0.244388	0.57048
SCENLAPFNTALK	Aminoacyl tRNA synthase complex-interacting multifunctional protein 2	Q13155	AIMP2	-0.721413	-0.107179	-0.414296	0.391361
SCFESSPDPELK	Serine/arginine repetitive matrix protein 2	Q9UQ35	SRRM2		1.94657	1.94657
SCFLCMVCK	Cysteine and glycine-rich protein 1	P21291	CSRP1	-1.92889		-1.92889
SCGKDGFHIR	60S ribosomal protein L10	P27635	RPL10	0.230985	0.236864	0.233924	2.09697
SCKPKPIGK	C-1-tetrahydrofolate synthase, cytoplasmic	P11586	MTHFD1	-0.124763		-0.124763
SCLLHQFTEK	Ras-related protein Rab-14	P61106	RAB14	0.228458	0.535857	0.382158	0.613611
SCLLLR	Ras-related protein Rab-1A	P62820	RAB1A	0.552255		0.552255
SCPFADVAPLQLK	Apoptosis regulatory protein Siva	O15304	SIVA1		2.64616	2.64616
SCPSFSASSEGTR	Deoxycytidine kinase	P27707	DCK	1.26952		1.26952
SCQFVAVR	Bifunctional glutamate/proline--tRNA ligase	P07814	EPRS1		0.667906	0.667906
SCQVENGR	Muscleblind-like protein 1	Q9NR56	MBNL1		0.268158	0.268158
SCSGVEFSTSGHAYTDTGK	Voltage-dependent anion-selective channel protein 3	Q9Y277	VDAC3	2.09481	0.949581	1.52219	0.640057
SCSGVEFSTSGSSNTDTGK	Voltage-dependent anion-selective channel protein 2	P45880	VDAC2	0.805025	1.05515	0.930089	1.07011
SCSGVEFSTSGSSNTDTGKVTGTLETK	Voltage-dependent anion-selective channel protein 2	P45880	VDAC2	0.958715	1.1154	1.03706	1.31876
SCSIDRSPGAGSLGSPASQR	LIM domain kinase 1	P53667	LIMK1	3.93833	0.491992	2.21516	0.375841
SCSLVLEHQPDNIK	Peptidyl-prolyl cis-trans isomerase FKBP8	Q14318	FKBP8	1.16269	0.409479	0.786086	0.546025
SCSMNQLSSGIPVPKPR	Stromal interaction molecule 2	Q9P246	STIM2		-1.35585	-1.35585
SCTTESCDFVR	Carnitine O-palmitoyltransferase 1, liver isoform	P50416	CPT1A	0.527747	1.70092	1.11433	0.510786
SCVEEPEPEPEAAEGDGDKK	Hepatoma-derived growth factor	P51858	HDGF	-0.407068	-0.878018	-0.642543	0.650473
SCYDLSCHAR	Glycine--tRNA ligase	P41250	GARS1	0.704133		0.704133
SDCYTELEK	Protein S100-A16	Q96FQ6	S100A16	5.0806		5.0806
SDEVDEQVACQEVK	A-kinase anchor protein 12	Q02952	AKAP12		-1.97768	-1.97768
SDPYHATSGALSPAKDCGSQK	Gap junction alpha-1 protein	P17302	GJA1		4.20135	4.20135
SDSHGLSSSLTDSSSPGVGASCRPSSQPIMSQSLPK	SLIT-ROBO Rho GTPase-activating protein 2	O75044	SRGAP2	0.586618		0.586618
SDTATGGESAGHATSSQEPSGCSDQRPAEDLNIR	UBX domain-containing protein 4	Q92575	UBXN4		0.280756	0.280756
SEAKPLAVCLGR	YrdC domain-containing protein, mitochondrial	Q86U90	YRDC		-0.265717	-0.265717
SECLNNIGDSSPLIR	Transportin-1	Q92973	TNPO1	0.963681	0.619054	0.791368	0.864905
SEDADRCTLPEHESPSQDISDACEAESTER	Leucine-rich repeat flightless-interacting protein 1	Q32MZ4	LRRFIP1	0.705286	-0.125739	0.289773	0.213023
SEDSKKPADDQDPIDALSGDLDSCPSTTETSQNTAK	Calpastatin	P20810	CAST		2.1919	2.1919
SEGGSGGGAAGGGAGGAGAGAGCGSGGSSVGVR	BMP-2-inducible protein kinase	Q9NSY1	BMP2K	-1.6057	1.01091	-0.297394	0.0666612
SEGTYCCGPVPVR	Protein-glutamine gamma-glutamyltransferase 2	P21980	TGM2	-0.201537	0.162506	-0.0195155	0.0305821
SETVLTCATGR	Integrin alpha-3	P26006	ITGA3	0.0262842	0.112256	0.0692701	0.451516
SEVSCK	Deoxycytidylate deaminase	P32321	DCTD	-0.207121	0.3218	0.0573394	0.063449
SFIPKDNQNFCVPCYEK	Four and a half LIM domains protein 2	Q14192	FHL2	4.05082	0.0038917	2.02735	0.301562
SFREPAPAEALPQQYPEPAPAALCGPPPR	Interferon regulatory factor 2-binding protein 1	Q8IU81	IRF2BP1	-1.15784		-1.15784
SGCSDLEEAVDSGADKK	Golgi-specific brefeldin A-resistance guanine nucleotide exchange factor 1	Q92538	GBF1	1.14193		1.14193
SGCSEAQPPESPETR	Transforming acidic coiled-coil-containing protein 3	Q9Y6A5	TACC3	-0.160851	-0.680476	-0.420663	0.453176
SGDAAIVDMVPGKPMCVESFSDYPPLGR	Elongation factor 1-alpha 1	P68104	EEF1A1	0.852202		0.852202
SGDFSCGGR	Low-density lipoprotein receptor	P01130	LDLR	0.967611		0.967611
SGFHTVPGQPGCQDINECLR	Prolow-density lipoprotein receptor-related protein 1	Q07954	LRP1	2.88206	2.55305	2.71755	1.41465
SGGEVVCSGWLR	GRB2-associated-binding protein 1	Q13480	GAB1		-1.60142	-1.60142
SGGSGGCSGAGGASNCGTGSGR	Signal peptidase complex subunit 2	Q15005	SPCS2	-0.0589217	-0.297623	-0.178272	0.425304
SGGSSCSQTPSR	Eukaryotic translation initiation factor 4E-binding protein 1	Q13541	EIF4EBP1	-0.678416	-0.120091	-0.399254	0.410651
SGINCPIQK	NPC intracellular cholesterol transporter 2	P61916	NPC2		-1.55298	-1.55298
SGLAYCPNDYHQLFSPR	Leupaxin	O60711	LPXN	-0.0566219		-0.0566219
SGLDDVEASSSYSNEQQLCPYAAAGECR	Probable E3 ubiquitin-protein ligase makorin-2	Q9H000	MKRN2		1.22882	1.22882
SGQGAFGNMCR	60S ribosomal protein L4	P36578	RPL4	0.61848	0.445495	0.531988	0.988826
SGSAAQAEGLCK	Dol-P-Man:Man(5)GlcNAc(2)-PP-Dol alpha-1,3-mannosyltransferase	Q92685	ALG3	-0.339479		-0.339479
SHAVACVNQFIISR	Transportin-1	Q92973	TNPO1		2.05202	2.05202
SHCFTQAMLSQPR	Phosphatidylethanolamine N-methyltransferase	Q9UBM1	PEMT	-0.324691		-0.324691
SHESLLSPCSTVECLDLGR	Ras GTPase-activating protein nGAP	Q9UJF2	RASAL2		0.198857	0.198857
SIFVTCGDWDLK	ERI1 exoribonuclease 3	O43414	ERI3		0.662478	0.662478
SIKDTICNQDER	Coronin-1C	Q9ULV4	CORO1C	-0.931381	0.0751708	-0.428105	0.258636
SILCCLR	Prostaglandin E synthase 3	Q15185	PTGES3		-0.184907	-0.184907
SIPICTLK	Ubiquitin-like modifier-activating enzyme 1	P22314	UBA1	-0.303451		-0.303451
SIPLECPLSSPK	A-kinase anchor protein 1, mitochondrial	Q92667	AKAP1	1.23403	0.295828	0.764928	0.455668
SISLTRPGSSSLSSGPNSILCR	Pleckstrin homology domain-containing family A member 2	Q9HB19	PLEKHA2	2.76223		2.76223
SITCWTLSR	Transportin-1	Q92973	TNPO1	0.257048	-1.18976	-0.466355	0.196912
SKDSLVQSCPGSLSLCAGVK	Serine/arginine repetitive matrix protein 2	Q9UQ35	SRRM2		0.684255	0.684255
SKGCGVVKFESPEVAER	Heterogeneous nuclear ribonucleoprotein M	P52272	HNRNPM		-1.17724	-1.17724
SKLTFSCLGGSDNFK	Prostaglandin E synthase 3	Q15185	PTGES3	-1.42214		-1.42214
SKPHSEAGTAFIQTQQLHAAMADTFLEHMCR	Pyruvate kinase PKM	P14618	PKM		0.0848721	0.0848721
SLCLGPALIHTAK	Succinate dehydrogenase cytochrome b560 subunit, mitochondrial	Q99643	SDHC	0.929146	-1.6659	-0.368376	0.0841293
SLCMDTSLDVYRK	Dehydrogenase/reductase SDR family member 7	Q9Y394	DHRS7	0.368124	1.03388	0.701002	0.549388
SLCVSTPGHR	GPI-anchor transamidase	Q92643	PIGK		1.54426	1.54426
SLDAFPEDFCR	N-terminal kinase-like protein	Q96KG9	SCYL1		-0.177067	-0.177067
SLDDSQCGITYK	TBC1 domain family member 13	Q9NVG8	TBC1D13	1.66125		1.66125
SLEGGGCPAR	FH1/FH2 domain-containing protein 1	Q9Y613	FHOD1	-0.85204		-0.85204
SLEICHPQER	Acyl-coenzyme A thioesterase 9, mitochondrial	Q9Y305	ACOT9	0.939818		0.939818
SLEKVCADLIR	40S ribosomal protein S20	P60866	RPS20	-0.149663	0.25269	0.0515138	0.0755065
SLFCPLDMGR	SH2 domain-containing protein 5	Q6ZV89	SH2D5		-0.154241	-0.154241
SLGQASEADPSGVASIACSSCVR	Apoptosis regulatory protein Siva	O15304	SIVA1		1.65039	1.65039
SLHDALCVLAQTVK	T-complex protein 1 subunit beta	P78371	CCT2		0.94215	0.94215
SLHDALCVVK	T-complex protein 1 subunit alpha	P17987	TCP1	2.81329	-0.425969	1.19366	0.224997
SLHDALCVVKR	T-complex protein 1 subunit alpha	P17987	TCP1		1.40262	1.40262
SLIANLAAANCYKK	Adenosine kinase	P55263	ADK	0.359564	0.113131	0.236347	0.514364
SLLNQCIEER	Target of EGR1 protein 1	Q96GM8	TOE1	0.109769		0.109769
SLLPGCQSVISR	Persulfide dioxygenase ETHE1, mitochondrial	O95571	ETHE1	0.00271185	0.0271881	0.01495	0.359807
SLNCTLR	Interleukin-1 beta	P01584	IL1B	0.502639	0.0542675	0.278453	0.364987
SLPDCTPHPNSISIDAGPR	Disks large-associated protein 4	Q9Y2H0	DLGAP4	2.52244		2.52244
SLPGPAPCLK	AMP deaminase 2	Q01433	AMPD2		1.18257	1.18257
SLQEEEPCPR	Muskelin	Q9UL63	MKLN1	-0.212982		-0.212982
SLRECELYVQK	cAMP-dependent protein kinase type I-alpha regulatory subunit	P10644	PRKAR1A		1.49449	1.49449
SLTDSCLFEK	A-kinase anchor protein 11	Q9UKA4	AKAP11	0.0260443		0.0260443
SMSAAFCSLLAPER	Ras and Rab interactor 1	Q13671	RIN1		0.113808	0.113808
SMSVYCTPNKPSR	Sarcoplasmic/endoplasmic reticulum calcium ATPase 2	P16615	ATP2A2	0.347116		0.347116
SMVSPVPSPTGTISVPNSCPASPR	Forkhead box protein K1	P85037	FOXK1	0.562095		0.562095
SNGLICGGNGVCK	Integrin beta-1	P05556	ITGB1	0.468131	0.254947	0.361539	0.738684
SPADQDRFICIYPAYLNNKK	Signal recognition particle 19 kDa protein	P09132	SRP19	-0.979606		-0.979606
SPEAVGSECPSR	Beta/gamma crystallin domain-containing protein 1	Q9Y4K1	CRYBG1		0.416758	0.416758
SPGHILCCECGVPISPNPANICVACLR	60S ribosomal export protein NMD3	Q96D46	NMD3		-0.171108	-0.171108
SPIDQCNPVHAR	Protein cornichon homolog 3	Q8TBE1	CNIH3		0.710716	0.710716
SPVPLTPPGCVALDTR	Mpv17-like protein 2	Q567V2	MPV17L2	1.00626		1.00626
SQACEPSEPEIEIK	DNA (cytosine-5)-methyltransferase 1	P26358	DNMT1		1.62961	1.62961
SQCALEEYVR	COUP transcription factor 1	P10589	NR2F1		2.09508	2.09508
SQDVAVSPQQQQCSK	Enhancer of mRNA-decapping protein 3	Q96F86	EDC3	0.544999	0.802166	0.673583	0.920518
SQGCSEQVLTVLK	DNA-dependent protein kinase catalytic subunit	P78527	PRKDC		2.05871	2.05871
SQKPEAGGCGAPAAR	TBC1 domain family member 4	O60343	TBC1D4		0.207018	0.207018
SQLELLISPTCSCK	Sister chromatid cohesion protein PDS5 homolog A	Q29RF7	PDS5A	-0.777002		-0.777002
SQSYIPTSGCR	Pleckstrin homology domain-containing family A member 2	Q9HB19	PLEKHA2	0.782602	0.786689	0.784646	2.78044
SRDFNEECPR	Integrin-linked protein kinase	Q13418	ILK	0.579122	1.04522	0.81217	0.749837
SRGEEQGCQGDGDAGVK	Ras and Rab interactor 1	Q13671	RIN1	0.395402	-0.11858	0.138411	0.164001
SRYPVCGSDGTTYPSGCQLR	Insulin-like growth factor-binding protein 7	Q16270	IGFBP7	0.362953		0.362953
SSEHINEGETAMLVCK	Basigin	P35613	BSG	-0.0539698	0.573046	0.259538	0.251982
SSEKNEDFAAHPGEDAVPTGPDCQAK	A-kinase anchor protein 12	Q02952	AKAP12	-0.0935877		-0.0935877
SSEVCADCSGPDPSWASVNR	ARF GTPase-activating protein GIT2	Q14161	GIT2		1.67803	1.67803
SSGEIVYCGQVFEK	60S ribosomal protein L18a	Q02543	RPL18A	-0.0669641	-0.296933	-0.181948	0.445157
SSIEDAQCPGLPDLIEENHVVNK	Disks large-associated protein 5	Q15398	DLGAP5	-0.128579	-0.031066	-0.0798227	0.457076
SSIVCR	Ras-related protein Rab-31	Q13636	RAB31		0.490101	0.490101
SSLSNCNSDSEQENISMVEGLK	SHC SH2 domain-binding protein 1	Q8NEM2	SHCBP1	-2.16768	1.05963	-0.554022	0.102673
SSNECFKCGR	Cellular nucleic acid-binding protein	P62633	CNBP		-2.04805	-2.04805
SSPVEFECINEK	Copine-3	O75131	CPNE3	-0.0909972	0.284965	0.096984	0.156908
SSQQPVSEVSTIPCPR	Pericentriolar material 1 protein	Q15154	PCM1		1.37946	1.37946
SSRPDTLLSPEQPVCPAGGSGGPPSSASPEVEAGPQGCATEPRPHR	Microtubule-associated protein 1A	P78559	MAP1A	1.47445		1.47445
SSSQPSSCCSDPSKPGGNVEGATQSLAEQMR	Sequestosome-1	Q13501	SQSTM1	0.376996	0.148132	0.262564	0.582275
SSSSVTTSETQPCTPSSSDYSDLQR	Vasodilator-stimulated phosphoprotein	P50552	VASP	-1.51401		-1.51401
SSSYCEYLRPPIDCFK	Neuropathy target esterase	Q8IY17	PNPLA6		0.0668529	0.0668529
SSVELPPYSGTVLCGTQAVDKLPDGQEYQR	Ubiquitin carboxyl-terminal hydrolase 10	Q14694	USP10		-0.985587	-0.985587
SSVNCPFSSQDMK	ATP-dependent RNA helicase A	Q08211	DHX9	0.599023		0.599023
SSVVPCELACR	Zinc transporter 1	Q9Y6M5	SLC30A1	2.06999		2.06999
STACQMLVCYAK	Importin-5	O00410	IPO5	0.553403	0.775882	0.664642	0.976455
STCIYGGAPK	Probable ATP-dependent RNA helicase DDX5	P17844	DDX5		-0.0810286	-0.0810286
STFQAHLAPVVCPK	Protein IMPACT	Q9P2X3	IMPACT	-1.09968	0.626069	-0.236806	0.0811914
STLTDSLVCK	Elongation factor 2	P13639	EEF2	0.0214141	0.210017	0.115715	0.3612
STNCFGDNDPIDVCEIGSK	Inorganic pyrophosphatase 2, mitochondrial	Q9H2U2	PPA2		2.58931	2.58931
STNICSFKDR	Protein FAM72C	H0Y354	FAM72C		-0.733634	-0.733634
STNLNCSVIADVR	39S ribosomal protein L53, mitochondrial	Q96EL3	MRPL53	-1.93323		-1.93323
STPYECGFDPMSPAR	NADH-ubiquinone oxidoreductase chain 3	P03897	MT-ND3		1.81399	1.81399
STQYLNQHQTAAMCK	Poly(ADP-ribose) glycohydrolase	Q86W56	PARG	1.94937	1.75531	1.85234	1.47732
SVAWAPSGNLLATCSR	Probable cytosolic iron-sulfur protein assembly protein CIAO1	O76071	CIAO1	-0.701774	0.876799	0.0875125	0.0316564
SVCTEAGMFAIR	26S proteasome regulatory subunit 7	P35998	PSMC2	-1.50042	-0.924487	-1.21246	0.828414
SVDCFLHDFASK	Syntaxin-binding protein 3	O00186	STXBP3	-0.923905	-1.44417	-1.18404	0.861134
SVGGACVLVA	60S ribosomal protein L27a	P46776	RPL27A	0.214346	0.236729	0.225538	1.50082
SVHYCPATK	DNA replication licensing factor MCM3	P25205	MCM3	2.49733		2.49733
SVLGGDCLLK	Tyrosine-protein kinase CSK	P41240	CSK		-3.83801	-3.83801
SVPLCILYEK	Protein-glutamine gamma-glutamyltransferase 2	P21980	TGM2	-0.105609	-0.0593571	-0.082483	0.759395
SVSPCSNVESR	Serine/arginine repetitive matrix protein 2	Q9UQ35	SRRM2	-0.405357	0.089854	-0.157752	0.194586
SVSPLVWCR	SLAIN motif-containing protein 2	Q9P270	SLAIN2	0.205753		0.205753
SVTSNQSDGTQESCESPDVLDR	Protein NDRG3	Q9UGV2	NDRG3		0.316233	0.316233
SVVIDCSSSQPQFCNAGSNR	Protein Njmu-R1	Q9HAS0	C17orf75		0.830999	0.830999
SWCPDCVQAEPVVR	Thioredoxin domain-containing protein 17	Q9BRA2	TXNDC17	0.306208	-0.0614093	0.1224	0.203425
SWHPEEFNCAHCK	PDZ and LIM domain protein 5	Q96HC4	PDLIM5	-0.742172		-0.742172
SWKEPCQVQSCQEEMISLGDGDIR	Condensin complex subunit 2	Q15003	NCAPH	3.16436	1.50688	2.33562	0.663407
SYCAEIAHNVSSK	60S ribosomal protein L32	P62910	RPL32	0.804513	-0.166436	0.319038	0.200749
SYLSSSAPSSSPAGLDGSQQGAVPGLGPKPGCTDLGTGPK	LIM domain-containing protein 1	Q9UGP4	LIMD1		-0.211104	-0.211104
TACTNFMMTPYVVTR	Mitogen-activated protein kinase 9	P45984	MAPK9		-0.234312	-0.234312
TAFSDCTSK	ADP-ribosylation factor-related protein 1	Q13795	ARFRP1	0.59011	-0.0611882	0.264461	0.247356
TAGQPEGGPGADFGQSCFPAEAGR	Ubiquitin carboxyl-terminal hydrolase 10	Q14694	USP10	-1.27645		-1.27645
TAICNLILGNPPSK	RNA-binding protein PNO1	Q9NRX1	PNO1	0.276255		0.276255
TAIHTAAMDMLGGPGIESQCR	Hydroxysteroid dehydrogenase-like protein 2	Q6YN16	HSDL2	0.0788769		0.0788769
TALLDISCVK	Long-chain-fatty-acid--CoA ligase 4	O60488	ACSL4		1.02243	1.02243
TASDCGAVK	Prosaposin	P07602	PSAP		0.827013	0.827013
TASISSSPSEGTPTVGSYGCTPQSLPK	La-related protein 1	Q6PKG0	LARP1	0.942326	-0.101229	0.420549	0.245554
TATAVAHCK	40S ribosomal protein S16	P62249	RPS16	0.240012	0.276723	0.258368	1.34532
TATAVAHCKR	40S ribosomal protein S16	P62249	RPS16	0.210829		0.210829
TATECDVR	Cytospin-A	Q69YQ0	SPECC1L	0.0409818	-1.68913	-0.824074	0.28782
TAVCDIPPR	Tubulin beta-4B chain	P68371	TUBB4B	0.13425	0.659455	0.396853	0.429287
TAVCDIPPRGLK	Tubulin beta-4B chain	P68371	TUBB4B	1.08432	0.0552459	0.569785	0.330132
TCADVDECSTTFPCSQR	Prolow-density lipoprotein receptor-related protein 1	Q07954	LRP1	1.05907	0.887331	0.973201	1.2516
TCDAFTYTGCGGNDNNFVSR	Tissue factor pathway inhibitor 2	P48307	TFPI2	0.521992	0.5564	0.539196	1.69238
TCDAFTYTGCGGNDNNFVSREDCKR	Tissue factor pathway inhibitor 2	P48307	TFPI2	0.964064	1.66344	1.31375	0.780907
TCDLVGEK	Cation-dependent mannose-6-phosphate receptor	P20645	M6PR	0.0214321	0.240752	0.131092	0.35313
TCEERPAEDGSDEEDPDSMEAPTR	WD repeat-containing protein 55	Q9H6Y2	WDR55	-0.234874	0.461771	0.113448	0.0971536
TCLPGFPGAPCAIK	Host cell factor 1	P51610	HCFC1	1.09036		1.09036
TCPLDEFQCNNTLCKPLAWK	Prolow-density lipoprotein receptor-related protein 1	Q07954	LRP1		1.22018	1.22018
TCTLENVK	Glutamine--fructose-6-phosphate aminotransferase [isomerizing] 2	O94808	GFPT2	0.376335	0.830253	0.603294	0.640032
TCTTVAFTQVNSEDKGALAK	60S ribosomal protein L7a	P62424	RPL7A		-0.794203	-0.794203
TCYEGNGHFYR	Urokinase-type plasminogen activator	P00749	PLAU	-0.326192	0.0927658	-0.116713	0.169802
TDACFIR	26S proteasome regulatory subunit 7	P35998	PSMC2	0.316434	0.195954	0.256194	0.832624
TDFQQGCAK	Persulfide dioxygenase ETHE1, mitochondrial	O95571	ETHE1	-0.120034	0.00486097	-0.0575867	0.279207
TDIQIALPSGCYGR	Deoxyuridine 5'-triphosphate nucleotidohydrolase, mitochondrial	P33316	DUT	-0.0322574	-0.193419	-0.112838	0.403627
TDQDEEHCR	Proteasomal ubiquitin receptor ADRM1	Q16186	ADRM1		1.07124	1.07124
TDRLEVCR	Muscleblind-like protein 1	Q9NR56	MBNL1		-0.31762	-0.31762
TDSCQGDSGGPLVCSLQGR	Urokinase-type plasminogen activator	P00749	PLAU	0.372831	-0.0107296	0.181051	0.285405
TDSCSSAQAQYDTPK	Discoidin, CUB and LCCL domain-containing protein 2	Q96PD2	DCBLD2	-1.2667	0.657936	-0.304381	0.0942171
TEVMALVPPADCR	Guanidinoacetate N-methyltransferase	Q14353	GAMT		-3.4767	-3.4767
TFLPEMSEKCEVLQYSAR	NADH dehydrogenase [ubiquinone] 1 alpha subcomplex subunit 10, mitochondrial	O95299	NDUFA10	1.32759	1.86387	1.59573	0.974759
TFPGCTIR	SUMO-activating enzyme subunit 2	Q9UBT2	UBA2	0.406783		0.406783
TFVSGACDASIK	Guanine nucleotide-binding protein G(I)/G(S)/G(T) subunit beta-2	P62879	GNB2	0.235285	0.44762	0.341452	0.7169
TGAVYLCPLTAHKDDCER	Integrin alpha-3	P26006	ITGA3		2.58305	2.58305
TGCIGAK	60S ribosomal protein L11	P62913	RPL11	0.169644	0.355662	0.262653	0.664213
TGCTFPEKPDFH	Adenosine kinase	P55263	ADK	-0.473647	1.62822	0.577285	0.167352
TGGNFPYLCR	Maspardin	Q9NZD8	SPG21		-1.04157	-1.04157
TGSQGQCTQVR	40S ribosomal protein S28	P62857	RPS28	-0.350181	0.213244	-0.0684688	0.0714937
TGTELVLLTAAPPPPPRPGPCAYAAHGR	Proline-rich AKT1 substrate 1	Q96B36	AKT1S1	0.847847		0.847847
TGTQEVGGQDPGEAVQPCR	Opioid growth factor receptor	Q9NZT2	OGFR		-3.61032	-3.61032
TGTSCALDCGAGIGR	N-terminal Xaa-Pro-Lys N-methyltransferase 1	Q9BV86	NTMT1	0.822551	0.615745	0.719148	1.04137
TGVHHYSGNNIELGTACGK	60S ribosomal protein L30	P62888	RPL30	-2.36429	-1.65195	-2.00812	0.951746
THPSAAVPVCPR	MAP7 domain-containing protein 1	Q3KQU3	MAP7D1	0.304422	0.771203	0.537812	0.583932
THSLVCPETVSR	Nuclear receptor 2C2-associated protein	Q86WQ0	NR2C2AP	0.024314	-0.151455	-0.0635704	0.220883
THTLCR	60S ribosomal protein L37	P61927	RPL37		-0.169732	-0.169732
TIAPCQK	Stress-70 protein, mitochondrial	P38646	HSPA9		-0.416719	-0.416719
TICSHVQNMIK	60S ribosomal protein L9	P32969	RPL9	0.212639	0.296239	0.254439	0.984388
TIPTDDNVVCFTR	Aldehyde dehydrogenase family 1 member A3	P47895	ALDH1A3	0.301249	0.515849	0.408549	0.786465
TITLQPGSPCNDFR	Disintegrin and metalloproteinase domain-containing protein 10	O14672	ADAM10		-0.602348	-0.602348
TIYAGNALCTVK	Electron transfer flavoprotein subunit alpha, mitochondrial	P13804	ETFA	-0.033397		-0.033397
TKENVNATENCISAVGK	Importin-5	O00410	IPO5	0.978852	0.723347	0.851099	1.02296
TKSCSGVEFSTSGHAYTDTGK	Voltage-dependent anion-selective channel protein 3	Q9Y277	VDAC3	0.260219	0.254891	0.257555	2.18149
TKSCSGVEFSTSGSSNTDTGK	Voltage-dependent anion-selective channel protein 2	P45880	VDAC2	1.0334	1.72103	1.37722	0.807586
TKSCSGVEFSTSGSSNTDTGKVTGTLETK	Voltage-dependent anion-selective channel protein 2	P45880	VDAC2	2.95308	4.94857	3.95082	0.802774
TLAPSLPCPGGR	Armadillo repeat-containing X-linked protein 1	Q9P291	ARMCX1	0.156303		0.156303
TLCGTPNYIAPEVLSK	Serine/threonine-protein kinase PLK1	P53350	PLK1	1.46258		1.46258
TLESQNLFCCLYR	Protein VAC14 homolog	Q08AM6	VAC14		1.47973	1.47973
TLETANCMSSQTK	Carnitine O-palmitoyltransferase 1, liver isoform	P50416	CPT1A	0.675541	0.41224	0.543891	0.820483
TLLCLCR	Ankyrin repeat and SOCS box protein 1	Q9Y576	ASB1		-1.57741	-1.57741
TLSFYFPPCGK	ATP-binding cassette sub-family F member 2	Q9UG63	ABCF2		0.0559091	0.0559091
TLSGMESYCVR	T-complex protein 1 subunit delta	P50991	CCT4	1.01648		1.01648
TLVKNCIVLIDSTPYR	40S ribosomal protein S8	P62241	RPS8	1.94472	0.319796	1.13226	0.402041
TLWEDPGIQECYDR	Guanine nucleotide-binding protein subunit alpha-11	P29992	GNA11	-0.333305		-0.333305
TMQFEPSTMVYDACR	Talin-1	Q9Y490	TLN1	1.01075	-0.399275	0.305735	0.131059
TMSVLSCICEAR	TP53-binding protein 1	Q12888	TP53BP1	0.448283		0.448283
TNEFPSPCLDSK	Allergin-1	Q7Z6M3	MILR1		-1.33127	-1.33127
TNGDCRVEECALGQDLCR	Urokinase plasminogen activator surface receptor	Q03405	PLAUR	0.368912	0.551972	0.460442	0.903355
TNHIGHTGYLNTVTVSPDGSLCASGGK	Receptor of activated protein C kinase 1	P63244	RACK1	0.150569	0.21503	0.1828	0.954264
TNLCQK	Alcohol dehydrogenase class-3	P11766	ADH5	-0.14551		-0.14551
TPCEEVYVK	Filamin-C	Q14315	FLNC	0.0539673		0.0539673
TPCGEGSK	40S ribosomal protein S20	P60866	RPS20		1.43166	1.43166
TPCNAGTFSQPEK	Mitotic checkpoint protein BUB3	O43684	BUB3	0.313822	-0.0221941	0.145814	0.263645
TPDGNLDQCK	High affinity cationic amino acid transporter 1	P30825	SLC7A1	1.52905	-4.668	-1.56948	0.15396
TPDTSTYCYETAEK	Microtubule-associated protein 1B	P46821	MAP1B	0.0601903	-0.259896	-0.0998527	0.190519
TPEQCPSVVSLLSESYNPHVR	26S proteasome non-ATPase regulatory subunit 1	Q99460	PSMD1		0.904385	0.904385
TPGAATASASGAAEDGACGCLPNPGTFEECHRK	Mitochondrial import receptor subunit TOM40 homolog	O96008	TOMM40	3.9218	-2.83616	0.542823	0.0464358
TPPEAIALCSR	Glycogen synthase kinase-3 beta	P49841	GSK3B		0.422839	0.422839
TPPLLENSLPQCYQR	Zinc transporter 7	Q8NEW0	SLC30A7	1.00194		1.00194
TPQASTYSYETSDLCYTAEK	Microtubule-associated protein 1B	P46821	MAP1B		1.01478	1.01478
TPQASTYSYETSDLCYTAEKK	Microtubule-associated protein 1B	P46821	MAP1B	0.462133	0.512184	0.487159	1.48579
TPSVSAPLALSCPR	LIM domain-containing protein 1	Q9UGP4	LIMD1	-0.749695	-0.198618	-0.474157	0.47479
TPYTIMFGPDKCGEDYK	Calnexin	P27824	CANX	-0.742765		-0.742765
TQHCDPEHFPFPAPANAPLQR	Serine/threonine-protein kinase A-Raf	P10398	ARAF		0.609147	0.609147
TQIAICPNNHEVHIYEK	Actin-related protein 2/3 complex subunit 1B	O15143	ARPC1B	-0.226267		-0.226267
TRPDGNCFYR	Ubiquitin thioesterase OTUB1	Q96FW1	OTUB1	0.296924	0.113122	0.205023	0.571432
TRPSSLESVTCWR	Leucine-rich repeat-containing protein 41	Q15345	LRRC41	0.813404		0.813404
TSACGLFSVCYPR	Serine/threonine-protein phosphatase 2A 65 kDa regulatory subunit A alpha isoform	P30153	PPP2R1A		0.0130161	0.0130161
TSAPITCELLNK	Cytoplasmic dynein 1 heavy chain 1	Q14204	DYNC1H1	0.160438		0.160438
TSCGSPNYAAPEVISGR	5'-AMP-activated protein kinase catalytic subunit alpha-2	P54646	PRKAA2		-0.132737	-0.132737
TSESLCQNNMVILK	Exportin-1	O14980	XPO1	0.922083		0.922083
TSEVNCYR	Cellular nucleic acid-binding protein	P62633	CNBP	1.1581	3.71707	2.43759	0.511842
TSMCSIQSAPPEPATLK	Calpastatin	P20810	CAST	-0.168576	-0.671246	-0.419911	0.464251
TSSDPTCVEK	Exportin-1	O14980	XPO1		2.0652	2.0652
TSSDPTCVEKEK	Exportin-1	O14980	XPO1	0.663363	0.43247	0.547916	0.87876
TSSSSCSAHSSFSSTGQPR	Rho guanine nucleotide exchange factor 6	Q15052	ARHGEF6	0.0977091	3.02977	1.56374	0.319233
TSSVSNPQDSVGSPCSR	Paxillin	P49023	PXN	-1.26167	-1.98839	-1.62503	0.853729
TSVPCAGATAFPADSDR	Cysteine protease ATG4B	Q9Y4P1	ATG4B	3.19827	0.0839362	1.6411	0.315787
TTCMSSQGSDDEQIKR	Septin-10	Q9P0V9	SEPTIN10		1.35011	1.35011
TTEEQVQASTPCPR	Ribosome biogenesis protein BOP1	Q14137	BOP1	1.9351	-0.677415	0.628842	0.146076
TTLSNGGCQYLCLPAPQINPHSPK	Low-density lipoprotein receptor	P01130	LDLR	-0.169587		-0.169587
TTPCSSAIINPLSTAGNSER	Receptor-interacting serine/threonine-protein kinase 2	O43353	RIPK2	2.00061	3.68417	2.84239	0.736844
TTPECGPTGYVEK	Protein JTB	O76095	JTB	1.22581	-0.527885	0.34896	0.119829
TTSEGATNCVCR	Ephrin type-B receptor 2	P29323	EPHB2	0.282971	1.24078	0.761876	0.447022
TTSILCLAR	Replication factor C subunit 2	P35250	RFC2	0.742064		0.742064
TTWGDGGENSPCNVVSK	Synaptosomal-associated protein 23	O00161	SNAP23	0.260494	0.16103	0.210762	0.831147
TVCDAAEK	Perilipin-3	O60664	PLIN3	-0.380212	-0.431113	-0.405663	1.39916
TVEICPFSFDSR	Targeting protein for Xklp2	Q9ULW0	TPX2		-1.59671	-1.59671
TVFAEHISDECK	60S ribosomal protein L3	P39023	RPL3	0.745746	0.620476	0.683111	1.23501
TVFAEHISDECKR	60S ribosomal protein L3	P39023	RPL3		0.477328	0.477328
TVGVQGDCR	GMP synthase [glutamine-hydrolyzing]	P49915	GMPS	-0.298526	0.117435	-0.0905453	0.131592
TVIEPMACDGLR	Plasma membrane calcium-transporting ATPase 4	P23634	ATP2B4		0.227359	0.227359
TVLCGTCGQPADK	Prelamin-A/C	P02545	LMNA	0.676703	0.708947	0.692825	1.82941
TVMPCGTVVTTVTAVK	C2 domain-containing protein 2	Q9Y426	C2CD2		0.587094	0.587094
TVNSNCEINNR	Pericentriolar material 1 protein	Q15154	PCM1	1.32477	0.95877	1.14177	0.994921
TVSYNGILGPECGTK	Protein-glutamine gamma-glutamyltransferase 2	P21980	TGM2	-0.124684	-0.165655	-0.14517	1.04941
TVVALCGQR	CD151 antigen	P48509	CD151	0.30697		0.30697
TVYFAEEVQCEGNSFHK	Cysteine and glycine-rich protein 1	P21291	CSRP1	0.265655		0.265655
TYAICGAIR	40S ribosomal protein S21	P63220	RPS21	0.0192181	0.0930692	0.0561436	0.43137
TYCCDLK	Mitochondrial carrier homolog 2	Q9Y6C9	MTCH2	-0.0850261	-0.0127356	-0.0488809	0.392173
TYCQER	Glutaryl-CoA dehydrogenase, mitochondrial	Q92947	GCDH		3.24834	3.24834
TYDPSGDSTLPTCSK	Nucleolar protein 58	Q9Y2X3	NOP58	0.0920119	1.05846	0.575235	0.351838
TYITDPVSAPCAPPLQPK	Lipoma-preferred partner	Q93052	LPP	0.145451	1.53416	0.839808	0.356722
TYPGVMHSSCPQEMAAVK	Acyl-protein thioesterase 2	O95372	LYPLA2	0.807077	0.582012	0.694544	0.990299
VAAAESMPLLLECAR	Importin-5	O00410	IPO5		0.0981957	0.0981957
VAAASGHCGAFSGSDSSR	Constitutive coactivator of PPAR-gamma-like protein 1	Q9NZB2	FAM120A		2.67187	2.67187
VAAQCSHAAVSAYK	Peptidyl-tRNA hydrolase 2, mitochondrial	Q9Y3E5	PTRH2	0.111702	0.503069	0.307385	0.442612
VACAEEWQESR	TIP41-like protein	O75663	TIPRL		0.544545	0.544545
VACETVAK	S-adenosylmethionine synthase isoform type-2	P31153	MAT2A	0.0402402	0.407507	0.223874	0.359182
VACIGAWHPAR	60S ribosomal protein L3	P39023	RPL3	0.659993	0.472729	0.566361	0.981699
VAHSFNCTPIEGMLSHQLK	Proliferation-associated protein 2G4	Q9UQ80	PA2G4	-0.575305	0.482538	-0.0463836	0.0248834
VAILVDDMADTCGTICHAADK	Ribose-phosphate pyrophosphokinase 2	P11908	PRPS2	-3.94923		-3.94923
VALEGLRPTIPPGISPHVCK	Integrin-linked protein kinase	Q13418	ILK	2.57246	3.33212	2.95229	1.08907
VAPVLETSHVFCCPNR	Elongator complex protein 2	Q6IA86	ELP2	-0.413618		-0.413618
VAQATCK	Hydroxymethylglutaryl-CoA lyase, mitochondrial	P35914	HMGCL		0.395812	0.395812
VAQATCKL	Hydroxymethylglutaryl-CoA lyase, mitochondrial	P35914	HMGCL	-0.721999	-0.350035	-0.536017	0.672408
VAQLCDFNPK	Clathrin light chain B	P09497	CLTB	-0.830217	-0.720621	-0.775419	1.34761
VASFSCMCPEGK	Neurogenic locus notch homolog protein 2	Q04721	NOTCH2	1.88593		1.88593
VASGSTATAAAGPSCALK	DNA-binding protein inhibitor ID-1	P41134	ID1		2.43957	2.43957
VATFHDCEDAAR	Dolichol-phosphate mannosyltransferase subunit 3	Q9P2X0	DPM3	0.941908	0.905746	0.923827	1.90454
VAVCDIPPR	Tubulin beta-6 chain	Q9BUF5	TUBB6	0.967177	1.8493	1.40824	0.713929
VAYQDPSSGCTSK	Ras and Rab interactor 1	Q13671	RIN1		5.50566	5.50566
VCADLIR	40S ribosomal protein S20	P60866	RPS20	-0.120309	0.314005	0.0968481	0.134936
VCALLSCTSHKDYPFHEEF	Aldo-keto reductase family 1 member B1	P15121	AKR1B1	-0.261946		-0.261946
VCASDTR	PCI domain-containing protein 2	Q5JVF3	PCID2	0.154634	0.426058	0.290346	0.555399
VCDIAAELAR	Importin-5	O00410	IPO5		0.902124	0.902124
VCDSCYDSIKDEDR	WD repeat and FYVE domain-containing protein 1	Q8IWB7	WDFY1		0.811566	0.811566
VCEEIAIIPSKK	40S ribosomal protein S17	P08708	RPS17		0.0540674	0.0540674
VCENIPIVLCGNK	GTP-binding nuclear protein Ran	P62826	RAN		-0.559264	-0.559264
VCENIPIVLCGNKVDIK	GTP-binding nuclear protein Ran	P62826	RAN	2.06723	-0.0707001	0.998266	0.282526
VCEPCYEQLNR	Hepatocyte growth factor-regulated tyrosine kinase substrate	O14964	HGS	-0.58694	-0.297185	-0.442062	0.695472
VCETDGCSSEAK	Methionine aminopeptidase 1	P53582	METAP1	0.064991	0.114233	0.0896119	0.767769
VCFGMLPK	Peptidyl-tRNA hydrolase 2, mitochondrial	Q9Y3E5	PTRH2	0.421135		0.421135
VCFVTSMMTGR	Retrotransposon-derived protein PEG10	Q86TG7	PEG10	3.24776		3.24776
VCISILHAPGDDPMGYESSAER	Ubiquitin-conjugating enzyme E2 G2	P60604	UBE2G2	-1.52414		-1.52414
VCLLGDTGVGK	Ras-related protein Rab-31	Q13636	RAB31	-0.140923	0.889516	0.374297	0.22183
VCNFLASQVPFPSR	3-hydroxyacyl-CoA dehydrogenase type-2	Q99714	HSD17B10		0.252752	0.252752
VCVIDEIGK	Cancer-related nucleoside-triphosphatase	Q9BSD7	NTPCR	-1.19101		-1.19101
VCVNEEGIQK	Dihydroxyacetone phosphate acyltransferase	O15228	GNPAT	0.0949367		0.0949367
VDCQAYAQTCQK	DnaJ homolog subfamily C member 10	Q8IXB1	DNAJC10		0.488716	0.488716
VDCTANTNTCNK	Protein disulfide-isomerase A3	P30101	PDIA3	0.348146	-0.38582	-0.0188372	0.0144159
VDENFDCVEADDVEGK	Histone acetyltransferase type B catalytic subunit	O14929	HAT1	-0.608083	-0.0500959	-0.329089	0.349041
VDPECSVEDSK	Protein AHNAK2	Q8IVF2	AHNAK2		0.168278	0.168278
VDQICHK	SUMO-activating enzyme subunit 1	Q9UBE0	SAE1	-1.02673		-1.02673
VDSPSHGLVTSSLCIPSPAR	Death domain-associated protein 6	Q9UER7	DAXX	0.0334744	-1.12843	-0.547477	0.284933
VDSPVTVCGDIHGQFYDLK	Serine/threonine-protein phosphatase 4 catalytic subunit	P60510	PPP4C		3.44277	3.44277
VDSTTCLFPVEEK	Glutamine--fructose-6-phosphate aminotransferase [isomerizing] 1	Q06210	GFPT1	0.117097	-0.0770475	0.0200245	0.0602355
VDVAVNCAGIAVASK	3-hydroxyacyl-CoA dehydrogenase type-2	Q99714	HSD17B10		-0.613929	-0.613929
VDVFREDLCTK	Proteasome activator complex subunit 1	Q06323	PSME1		2.1747	2.1747
VEANLHGLTLYDTAPCPINNER	DNA damage-regulated autophagy modulator protein 2	Q6UX65	DRAM2		1.65225	1.65225
VEECALGQDLCR	Urokinase plasminogen activator surface receptor	Q03405	PLAUR	0.774894	0.742279	0.758586	1.8638
VEEPSKYGVVVCEADTGR	Mannose-1-phosphate guanyltransferase beta	Q9Y5P6	GMPPB	0.55054	1.46924	1.00989	0.565812
VELCSFSGYK	60S ribosomal protein L24	P83731	RPL24		0.289376	0.289376
VELPTCMYR	Aminoacyl tRNA synthase complex-interacting multifunctional protein 2	Q13155	AIMP2	0.358169	0.443372	0.40077	1.17122
VEPSDRYPQCLCLSPTYELALQTGK	ATP-dependent RNA helicase DDX19A	Q9NUU7	DDX19A		0.164431	0.164431
VEQNSEPCAGSSSESDLQTVFKNESLNAESK	Putative E3 ubiquitin-protein ligase UBR7	Q8N806	UBR7		-1.00976	-1.00976
VETCGCAEGYAR	Vacuolar protein sorting-associated protein 26C	O14972	VPS26C	-1.18136		-1.18136
VEYPIMYSTDPENGHIFNCIQR	Microsomal glutathione S-transferase 3	O14880	MGST3		1.06969	1.06969
VFANAPDSACVIGLK	ATP-dependent 6-phosphofructokinase, liver type	P17858	PFKL	0.153922	0.636651	0.395287	0.457196
VFCSHCGNK	RNA-binding protein NOB1	Q9ULX3	NOB1		0.357701	0.357701
VFDGCPLK	Mitogen-activated protein kinase kinase kinase kinase 5	Q9Y4K4	MAP4K5		0.0812489	0.0812489
VFFPLCGK	Thiopurine S-methyltransferase	P51580	TPMT	-0.0937415	-0.262204	-0.177973	0.550653
VFGSCPR	Proteasome assembly chaperone 1	O95456	PSMG1	-0.6472	-0.828202	-0.737701	1.10951
VFHVGCFVCSTCR	Thyroid receptor-interacting protein 6	Q15654	TRIP6	0.255082	0.793051	0.524066	0.520156
VFNDTCR	Leucine-rich PPR motif-containing protein, mitochondrial	P42704	LRPPRC		0.928453	0.928453
VGAPLICCEIK	Long-chain-fatty-acid--CoA ligase 4	O60488	ACSL4		0.674999	0.674999
VGAPLVCCEIK	Long-chain-fatty-acid--CoA ligase 3	O95573	ACSL3		0.259636	0.259636
VGCAVQFCPK	Glioma pathogenesis-related protein 1	P48060	GLIPR1	0.886321		0.886321
VGCVWQTVR	Golgi-specific brefeldin A-resistance guanine nucleotide exchange factor 1	Q92538	GBF1		1.27879	1.27879
VGEATETALTCLVEK	Sarcoplasmic/endoplasmic reticulum calcium ATPase 2	P16615	ATP2A2	0.290689	0.558894	0.424792	0.710699
VGESNLTNGDEPTQCSR	MMS19 nucleotide excision repair protein homolog	Q96T76	MMS19		0.125908	0.125908
VGIIPPKGCLLYGPPGTGK	26S proteasome regulatory subunit 10B	P62333	PSMC6	0.155669	0.363277	0.259473	0.615703
VGLSGAPADACSTAQK	N-acylneuraminate cytidylyltransferase	Q8NFW8	CMAS	1.02283		1.02283
VGNCNTPKPSFFDFEGK	Acyl-CoA-binding domain-containing protein 6	Q9BR61	ACBD6		0.317608	0.317608
VHPEEQGWICDPCHLAR	Melanophilin	Q9BV36	MLPH	0.666808		0.666808
VIACFDSLK	Muscleblind-like protein 1	Q9NR56	MBNL1	0.376556	0.502667	0.439611	1.04242
VICAEEPYICK	GMP synthase [glutamine-hydrolyzing]	P49915	GMPS	0.329086	-0.497705	-0.0843093	0.0595224
VIEQLGTPCPEFMK	Mitogen-activated protein kinase 8	P45983	MAPK8	-5.19827		-5.19827
VIGIECSSISDYAVK	Protein arginine N-methyltransferase 1	Q99873	PRMT1	-0.351638	-0.248229	-0.299934	0.963862
VIGSGCNLDSAR	L-lactate dehydrogenase A chain	P00338	LDHA	-0.76891	0.328363	-0.220273	0.120937
VIGVELCPEAVEDAR	tRNA (uracil-5-)-methyltransferase homolog A	Q8IZ69	TRMT2A	-1.02295	1.4737	0.225374	0.0524247
VITVDGNICTGK	NADH dehydrogenase [ubiquinone] 1 alpha subcomplex subunit 10, mitochondrial	O95299	NDUFA10	0.056412	0.595782	0.326097	0.356646
VKDSDDVPMVLVGNKCDLPTR	GTPase NRas	P01111	NRAS	-0.466195	-0.00974861	-0.237972	0.312748
VKDTDDVPMILVGNKCDLEDER	Ras-related protein Rap-1b	P61224	RAP1B	-0.326433	-2.22296	-1.27469	0.390216
VKDTEDVPMILVGNKCDLEDER	Ras-related protein Rap-1A	P62834	RAP1A	0.355586	0.917269	0.636427	0.577468
VKNPCLNVQSQR	A-kinase anchor protein 11	Q9UKA4	AKAP11		2.13021	2.13021
VKTEQQESDSVQCMPVAK	Nucleus accumbens-associated protein 1	Q96RE7	NACC1		-0.606538	-0.606538
VLAELPQCLR	Ras-related protein Rab-34	Q9BZG1	RAB34	0.443101	0.242021	0.342561	0.740547
VLAELPQCLRK	Ras-related protein Rab-34	Q9BZG1	RAB34	0.737282	0.095867	0.416575	0.379152
VLCPINYPLSPTR	E3 ubiquitin-protein ligase TRIM47	Q96LD4	TRIM47	0.00882866	-0.293227	-0.142199	0.284697
VLCSSPAPR	Palmitoyltransferase ZDHHC5	Q9C0B5	ZDHHC5		0.353388	0.353388
VLEFNCR	Trifunctional purine biosynthetic protein adenosine-3	P22102	GART	-0.0744681		-0.0744681
VLGPCSDILKR	cAMP-dependent protein kinase type I-alpha regulatory subunit	P10644	PRKAR1A	-1.09584	0.645742	-0.225049	0.0762413
VLHDAQQQCR	Acetolactate synthase-like protein	A1L0T0	ILVBL		1.83157	1.83157
VLPMNTGVEAGETACK	Ornithine aminotransferase, mitochondrial	P04181	OAT	0.476667	0.715166	0.595917	0.900549
VLQPPKGDVAAECVR	Catechol O-methyltransferase domain-containing protein 1	Q86VU5	COMTD1		1.86694	1.86694
VLTGVAGEDAECHAAK	Importin-7	O95373	IPO7	0.947929	2.34085	1.64439	0.593375
VLTMPETCR	26S proteasome non-ATPase regulatory subunit 1	Q99460	PSMD1	-1.57513		-1.57513
VLVCPIYTCLR	CBP80/20-dependent translation initiation factor	O43310	CTIF		-0.727532	-0.727532
VLVSPTNPPGATSSCQK	General vesicular transport factor p115	O60763	USO1		2.81597	2.81597
VLVTQQFPCQNPLPVNSGQAQR	Aurora kinase A	O14965	AURKA		-0.0677497	-0.0677497
VLVTTNVCAR	ATP-dependent RNA helicase DDX19A	Q9NUU7	DDX19A	0.365289	-0.477999	-0.0563553	0.0383828
VLYCCPEIFTMR	Transcription termination factor 4, mitochondrial	Q7Z6M4	MTERF4		-1.27955	-1.27955
VMPFSTACNTPLSNFESHQNYK	Isoleucine--tRNA ligase, cytoplasmic	P41252	IARS1	-1.1034	1.9416	0.4191	0.0814495
VMTGDSCTR	Cytoplasmic tRNA 2-thiolation protein 2	Q2VPK5	CTU2	-0.104725	2.24132	1.0683	0.27595
VMTIPYQPMPASSPVICAGGQDR	Poly(rC)-binding protein 1	Q15365	PCBP1	-0.424179	-0.338168	-0.381173	1.14555
VNCLAPGLIK	Putative dehydrogenase/reductase SDR family member 4-like 1	P0CG22	DHRS4L1		0.882235	0.882235
VNCSQFLGLCALPGCK	Cyclin-dependent kinase inhibitor 3	Q16667	CDKN3		1.84503	1.84503
VNDGVCDCCDGTDEYNSGVICENTCK	Glucosidase 2 subunit beta	P14314	PRKCSH	-0.451695	0.971361	0.259833	0.109523
VNDGVCDCCDGTDEYNSGVICENTCKEK	Glucosidase 2 subunit beta	P14314	PRKCSH	1.13786	1.54008	1.33897	1.02269
VNFCPLPSEQCYQAPGGPEDR	Thyroid receptor-interacting protein 6	Q15654	TRIP6	2.43113	0.160048	1.29559	0.338992
VNFCPLPSEQCYQAPGGPEDRGPAWVGSHGVLQHTQGLPADR	Thyroid receptor-interacting protein 6	Q15654	TRIP6	0.964208		0.964208
VNIHCPCGLVTAFVACEDGR	Trans-3-hydroxy-L-proline dehydratase	Q96EM0	L3HYPDH		0.560803	0.560803
VNQAIWLLCTGAR	40S ribosomal protein S5	P46782	RPS5		-0.0391766	-0.0391766
VNQIGSVTESLQACK	Alpha-enolase	P06733	ENO1	1.96478		1.96478
VPADEVCGCPLVR	CXXC-type zinc finger protein 1	Q9P0U4	CXXC1		2.4899	2.4899
VPCILPIIENGKK	ERBB receptor feedback inhibitor 1	Q9UJM3	ERRFI1		0.360795	0.360795
VPTANVSVVDLTCR	Glyceraldehyde-3-phosphate dehydrogenase	P04406	GAPDH	1.94745	1.83852	1.89299	1.73729
VQAHAAAALINFTEDCPK	Importin-5	O00410	IPO5	1.181		1.181
VQGVDPGCMSPDVK	LIM domain kinase 1	P53667	LIMK1	5.22535		5.22535
VQIGVVGGSDYCK	Phosphomannomutase 1	Q92871	PMM1	0.180287	-0.0700344	0.0551262	0.133193
VQRPCTSTPMIDSFVR	Ubiquitin carboxyl-terminal hydrolase 10	Q14694	USP10	0.806479	1.34836	1.07742	0.804542
VQTDAFVSNELDDPDDLQCK	Translation initiation factor eIF-2B subunit delta	Q9UI10	EIF2B4	1.35574	1.84425	1.6	1.01574
VQVMDACLR	RING-box protein 2	Q9UBF6	RNF7	-4.92554	-0.890293	-2.90792	0.413233
VRDGLPLSASTDYEQSTGMQECR	Vesicle-trafficking protein SEC22a	Q96IW7	SEC22A	1.17013		1.17013
VRGDNYCALR	Ubiquitin thioesterase otulin	Q96BN8	OTULIN	1.10648		1.10648
VRLPCQPLVPGPELRPSAAELK	LIM domain-containing protein 1	Q9UGP4	LIMD1	-0.908074	1.13027	0.111099	0.0311084
VRNCSSPEFSK	Copine-1	Q99829	CPNE1		2.4259	2.4259
VRPCVVYGGADIGQQIR	ATP-dependent RNA helicase DDX3X	O00571	DDX3X	-0.482665		-0.482665
VSAVISTNSTPCR	Rho GTPase-activating protein 31	Q2M1Z3	ARHGAP31		1.10335	1.10335
VSCMFIPDGR	Thioredoxin-interacting protein	Q9H3M7	TXNIP	-0.626383		-0.626383
VSMVHGSSLETLPSCPAVTGQK	A-kinase anchor protein 11	Q9UKA4	AKAP11		1.34264	1.34264
VSPCLPVLSR	Importin subunit alpha-7	O60684	KPNA6	-0.31636	-0.832871	-0.574615	0.570407
VSVPQCKPLSPGEILGCTSPR	2-(3-amino-3-carboxypropyl)histidine synthase subunit 1	Q9BZG8	DPH1	2.04763	0.296152	1.17189	0.388746
VSYIGVCQSK	OCIA domain-containing protein 2	Q56VL3	OCIAD2	0.339898	0.420966	0.380432	1.17021
VTAVIPCFPYAR	Ribose-phosphate pyrophosphokinase 2	P11908	PRPS2		0.292929	0.292929
VTCACQEHR	Ras-related protein Rab-34	Q9BZG1	RAB34	-1.1359	0.107422	-0.514241	0.251792
VTCIDPNPNFEK	Methyltransferase-like protein 7A	Q9H8H3	METTL7A	1.70513	-0.182043	0.761543	0.245873
VTCLDPNPHFEK	Methyltransferase-like protein 7B	Q6UX53	METTL7B	2.06882		2.06882
VTDTQEAECAGPPVPDPK	Tetratricopeptide repeat protein 1	Q99614	TTC1	0.750364	1.57968	1.16502	0.662168
VTELNPDKNCIHTDDDEKISYR	Sulfide:quinone oxidoreductase, mitochondrial	Q9Y6N5	SQOR		1.74385	1.74385
VTEQPGCCLPVMEAESTK	AP-4 complex subunit epsilon-1	Q9UPM8	AP4E1		-1.66502	-1.66502
VTQQVNPIFSEAC	GMP reductase 2	Q9P2T1	GMPR2	-0.132884		-0.132884
VTWDSSFCAVNPR	Coronin-1C	Q9ULV4	CORO1C	-1.52998		-1.52998
VTYDSDATSSACR	Leptin receptor gene-related protein	O15243	LEPROT	-0.263367	0.886151	0.311392	0.164999
VTYTEFCQGR	RNA N6-adenosine-methyltransferase METTL16	Q86W50	METTL16		2.2507	2.2507
VVAACAMPVMK	NADH-ubiquinone oxidoreductase 75 kDa subunit, mitochondrial	P28331	NDUFS1	-1.08731	-1.26757	-1.17744	1.31304
VVAQEAQSLGGQCVPVVCDSSQESEVR	Dehydrogenase/reductase SDR family member 1	Q96LJ7	DHRS1	1.80847		1.80847
VVCFNHDNTLLATGGTDGYVR	Prolactin regulatory element-binding protein	Q9HCU5	PREB	1.09174	-0.43193	0.329904	0.130863
VVDGHLNLPVCK	General transcription factor 3C polypeptide 1	Q12789	GTF3C1	0.287127		0.287127
VVDLCR	Alkyldihydroxyacetonephosphate synthase, peroxisomal	O00116	AGPS	0.0175144	-0.133444	-0.057965	0.234271
VVFTPSICK	Latent-transforming growth factor beta-binding protein 1	Q14766	LTBP1	0.661388		0.661388
VVGCSCVVVK	40S ribosomal protein S12	P25398	RPS12	-0.172398	-0.83577	-0.504084	0.431215
VVGNPCPICR	28S ribosomal protein S18b, mitochondrial	Q9Y676	MRPS18B		-0.518157	-0.518157
VVGSVGQHTGEPVEELALSHCGR	WD repeat-containing protein 55	Q9H6Y2	WDR55	-0.580337	-0.0202185	-0.300278	0.320727
VVLDNIHGCPLR	FAST kinase domain-containing protein 2, mitochondrial	Q9NYY8	FASTKD2		-0.151037	-0.151037
VVLLGEGCVGK	Ras-related protein Rab-21	Q9UL25	RAB21	0.850304	0.672425	0.761365	1.13058
VVMALGDYMGASCHACIGGTNVR	Eukaryotic initiation factor 4A-I	P60842	EIF4A1	0.0421974	0.453374	0.247786	0.355643
VVNEINIEDLCLTK	CDGSH iron-sulfur domain-containing protein 2	Q8N5K1	CISD2		-0.635782	-0.635782
VVSGMVNCNDDQGVLLGR	Protein-glutamine gamma-glutamyltransferase 2	P21980	TGM2	0.606435	1.9053	1.25587	0.517376
VVVFIKPTCPYCR	Glutaredoxin-1	P35754	GLRX	-0.301195	-0.458109	-0.379652	0.886945
VWNLANCK	Receptor of activated protein C kinase 1	P63244	RACK1	-0.111999	0.237848	0.0629243	0.107812
VYKEFCDFYAK	LIM and senescent cell antigen-like-containing domain protein 3	P0CW19	LIMS3	-0.756712	-0.113801	-0.435256	0.392575
VYSCDQER	SPARC-related modular calcium-binding protein 1	Q9H4F8	SMOC1	1.07291		1.07291
WACLVAGGSK	CD97 antigen	P48960	CD97	0.75406	4.4262	2.59013	0.406077
WASGLTPAQNCPR	Tapasin	O15533	TAPBP	2.87962		2.87962
WEALHAAECPCGPSLIR	Cytochrome c-type heme lyase	P53701	HCCS	-0.430103	0.293118	-0.0684928	0.0551083
WKSDEVDEQVACQEVK	A-kinase anchor protein 12	Q02952	AKAP12	-1.41507		-1.41507
WNDNCPSWNTIDPEER	Calpain-2 catalytic subunit	P17655	CAPN2	-0.798457	-0.515782	-0.657119	0.870074
WRCDADADCMDGSDEEACGTGVR	Prolow-density lipoprotein receptor-related protein 1	Q07954	LRP1	0.320427		0.320427
WVPEITHHCPK	Cell division control protein 42 homolog	P60953	CDC42	-0.461972		-0.461972
YAECGLR	Phospholipid hydroperoxide glutathione peroxidase	P36969	GPX4		-0.855684	-0.855684
YAGLSTCFR	Serine--tRNA ligase, cytoplasmic	P49591	SARS1	-1.56471	-0.43217	-0.998438	0.483539
YAYFNGCSSPTAPLSPMSPPGYK	Gap junction alpha-1 protein	P17302	GJA1		0.880673	0.880673
YCQVIR	60S ribosomal protein L3	P39023	RPL3	-0.695053	0.1539	-0.270576	0.194687
YCRPESQEHPEADPGSAAPYLK	Signal transducer and activator of transcription 3	P40763	STAT3	2.29205		2.29205
YDDMATCMK	14-3-3 protein theta	P27348	YWHAQ	-0.0247145	0.187586	0.0814355	0.234038
YDGYTSCPLVTGYNR	Sulfide:quinone oxidoreductase, mitochondrial	Q9Y6N5	SQOR	0.909586	1.92841	1.419	0.658723
YEAACNR	Integrin-linked kinase-associated serine/threonine phosphatase 2C	Q9H0C8	ILKAP		0.54855	0.54855
YEDICPSTHNMDVPNIK	Eukaryotic translation initiation factor 5A-1	P63241	EIF5A	-0.63971		-0.63971
YEDICPSTHNMDVPNIKR	Eukaryotic translation initiation factor 5A-1	P63241	EIF5A	-0.279776	-0.818309	-0.549042	0.537191
YEQGTGCWQGPNR	Glucosidase 2 subunit beta	P14314	PRKCSH	-0.418031	-0.459073	-0.438552	1.52626
YESHPVCADLQAK	MIC	Q9NX63	CHCHD3	1.79058	1.47515	1.63287	1.21255
YFCHCCSVEIVPR	E3 ubiquitin-protein ligase RNF126	Q9BV68	RNF126	0.0076833		0.0076833
YFDSCNGDLDPEIVK	Cyclin-dependent-like kinase 5	Q00535	CDK5	0.20224	0.592989	0.397614	0.536472
YFFNLSSMTCEK	Tissue factor pathway inhibitor 2	P48307	TFPI2		2.43684	2.43684
YFGDCKEEELLPK	Retinol dehydrogenase 14	Q9HBH5	RDH14		-0.670969	-0.670969
YGCEGPSHGGLPGASSEK	Nuclear factor NF-kappa-B p100 subunit	Q00653	NFKB2		-0.646879	-0.646879
YGDGGSTFQSTTGHCVHMR	Heterogeneous nuclear ribonucleoprotein H	P31943	HNRNPH1	-0.295308	0.490452	0.0975721	0.0731278
YGDSEFTVQSTTGHCVHMR	Heterogeneous nuclear ribonucleoprotein F	P52597	HNRNPF	-0.87963	1.44641	0.283389	0.0716851
YGEVEEMNVCDNLGDHLVGNVYVK	Splicing factor U2AF 35 kDa subunit-like protein	P0DN76	U2AF1L5		0.57575	0.57575
YGVVVCEADTGR	Mannose-1-phosphate guanyltransferase beta	Q9Y5P6	GMPPB	-5.79011		-5.79011
YHPLSSCLTAR	MMS19 nucleotide excision repair protein homolog	Q96T76	MMS19	0.713755		0.713755
YICPHAPR	Acyl-protein thioesterase 2	O95372	LYPLA2	0.332797		0.332797
YIETSELCGGAR	Dynamin-1-like protein	O00429	DNM1L	1.45401		1.45401
YKCSVCPDYDLCSVCEGK	Sequestosome-1	Q13501	SQSTM1	0.217137	0.370284	0.29371	0.789521
YKPAVNQIECHPYLTQEK	Aldo-keto reductase family 1 member B1	P15121	AKR1B1	-3.51095		-3.51095
YKVCNYGLTFTQK	Voltage-dependent anion-selective channel protein 3	Q9Y277	VDAC3	1.59379		1.59379
YKVEYPIMYSTDPENGHIFNCIQR	Microsomal glutathione S-transferase 3	O14880	MGST3		1.26773	1.26773
YKWCEYGLTFTEK	Voltage-dependent anion-selective channel protein 2	P45880	VDAC2	0.843392	0.201381	0.522387	0.454959
YLAEVACGDDR	14-3-3 protein theta	P27348	YWHAQ	-0.355234	-0.325529	-0.340381	1.55656
YLAEVACGDDRK	14-3-3 protein theta	P27348	YWHAQ	-0.765342	3.18188	1.20827	0.186905
YLECISCGSSDMSCER	Urokinase plasminogen activator surface receptor	Q03405	PLAUR	1.8357	1.95852	1.89711	1.6861
YLECSALQQDGVK	Rho-related GTP-binding protein RhoG	P84095	RHOG	0.541407	3.63646	2.08894	0.391571
YLECSALTQR	Ras-related C3 botulinum toxin substrate 2	P15153	RAC2	1.50554	0.547972	1.02675	0.556303
YLSDSCSPR	Conserved oligomeric Golgi complex subunit 7	P83436	COG7	1.27651		1.27651
YLTNAYSRDEFTNTCPSDKEVEIAYSDVAK	Chloride intracellular channel protein 4	Q9Y696	CLIC4	-0.413424	0.442246	0.0144112	0.00941064
YLVALGHAYHPEEFVCSQCGK	PDZ and LIM domain protein 7	Q9NR12	PDLIM7	-2.21819		-2.21819
YMACCLLYR	Tubulin alpha-4A chain	P68366	TUBA4A	1.19212	0.0703868	0.631256	0.33493
YMACCLLYRGDVVPK	Tubulin alpha-4A chain	P68366	TUBA4A	0.337581		0.337581
YMLDCR	Voltage-dependent anion-selective channel protein 3	Q9Y277	VDAC3	0.227202	0.335317	0.281259	0.917633
YNCSIESPR	Procollagen-lysine,2-oxoglutarate 5-dioxygenase 2	O00469	PLOD2		1.19402	1.19402
YNFFCQGTR	Elongation of very long chain fatty acids protein 5	Q9NYP7	ELOVL5	2.06758	2.31259	2.19008	1.44888
YNFFTGCPK	T-complex protein 1 subunit eta	Q99832	CCT7	0.0902149	0.663856	0.377035	0.382986
YNPTWHCIVGR	Dynein light chain 1, cytoplasmic	P63167	DYNLL1	0.0980057	0.908635	0.503321	0.36492
YPHCAVNGLLVAEK	ER membrane protein complex subunit 8	O43402	EMC8	1.00516	0.0998052	0.552481	0.359524
YPNCPTDVR	Origin recognition complex subunit 4	O43929	ORC4		2.94999	2.94999
YPNVFGIGDCTNLPTSK	Sulfide:quinone oxidoreductase, mitochondrial	Q9Y6N5	SQOR		0.998192	0.998192
YQEAAPNVANNTGPHAASCFGAK	Catenin delta-1	O60716	CTNND1	0.540485	2.33351	1.437	0.449647
YQHLITNSFVECNR	E3 ubiquitin-protein ligase ARIH1	Q9Y4X5	ARIH1	0.449777	0.476288	0.463033	1.73945
YRCELLYEGPPDDEAAMGIK	Elongation factor 2	P13639	EEF2		0.100025	0.100025
YRDCLTESNLIK	Protein-glutamine gamma-glutamyltransferase 2	P21980	TGM2	-0.00376292	-0.0346104	-0.0191867	0.365466
YRDVAECGPQQELDLNSPR	Mini-chromosome maintenance complex-binding protein	Q9BTE3	MCMBP	0.224778		0.224778
YRNPVSQCMR	TAR DNA-binding protein 43	Q13148	TARDBP		-1.90205	-1.90205
YRPENTPEPVSTSVSHYGAEPTTVSPCPSSSAK	Tyrosine-protein kinase Yes	P07947	YES1	0.528953	0.0536914	0.291322	0.360912
YRTCDAFTYTGCGGNDNNFVSR	Tissue factor pathway inhibitor 2	P48307	TFPI2	0.854077	0.556641	0.705359	0.878482
YSEEANNLIEECEQAER	ERO1-like protein alpha	Q96HE7	ERO1A		-0.520815	-0.520815
YSESLLCSNLESATYSNR	Mitochondrial import receptor subunit TOM34	Q15785	TOMM34	-1.11783		-1.11783
YSLDPENPTKSCK	60S ribosomal protein L17	P18621	RPL17	-0.780292	0.872054	0.0458809	0.0156158
YSNSALGHVNCTIK	Reticulon-4	Q9NQC3	RTN4	2.47594		2.47594
YSYVCPDLVK	Actin-related protein 3	P61158	ACTR3	-0.492832		-0.492832
YTCSEAQK	Tyrosyl-DNA phosphodiesterase 1	Q9NUW8	TDP1		-0.0726824	-0.0726824
YTCSFCGK	60S ribosomal protein L37a	P61513	RPL37A	0.0790044	0.0727664	0.0758854	1.58251
YTGDKCELDQCWEHCR	Prolow-density lipoprotein receptor-related protein 1	Q07954	LRP1	1.23316	0.404799	0.818979	0.525671
YTGTLDCAKK	Mitochondrial carnitine/acylcarnitine carrier protein	O43772	SLC25A20	0.87222	-0.114827	0.378696	0.234085
YTPPTQPPISPPYQEACTLK	Putative tRNA (cytidine(32)/guanosine(34)-2'-O)-methyltransferase	Q9UET6	FTSJ1	0.413538		0.413538
YTPPTQPPISPPYQEACTLKR	Putative tRNA (cytidine(32)/guanosine(34)-2'-O)-methyltransferase	Q9UET6	FTSJ1	-1.57101		-1.57101
YTQPNICR	DNA replication licensing factor MCM6	Q14566	MCM6		-4.11775	-4.11775
YTQSCR	Tissue factor pathway inhibitor 2	P48307	TFPI2	0.346054	0.346514	0.346284	3.37424
YTQSNSVCYAK	Bifunctional purine biosynthesis protein PURH	P31939	ATIC	-0.690643		-0.690643
YTVQDESHSEWVSCVR	Receptor of activated protein C kinase 1	P63244	RACK1	1.36981	0.683676	1.02674	0.687634
YVAAAFPSACGK	Phosphoenolpyruvate carboxykinase [GTP], mitochondrial	Q16822	PCK2	0.44216	0.38404	0.4131	1.3496
YVDIAIPCNNK	40S ribosomal protein SA	P08865	RPSA	0.096807	0.149706	0.123256	0.871052
YVECSALTQK	Cell division control protein 42 homolog	P60953	CDC42	-0.374558	-0.0990823	-0.23682	0.474482
YVENPSQVLNCER	Nuclear pore complex protein Nup155	O75694	NUP155		1.20482	1.20482
YVLCTAPR	DNA replication licensing factor MCM3	P25205	MCM3	0.731456	1.65444	1.19295	0.628954
YWLCAATGPSIK	Receptor of activated protein C kinase 1	P63244	RACK1	-0.0510246	-0.261487	-0.156256	0.423294
YYHQLTEGCGNEACTNEFCASCPTFLR	Ubiquitin-protein ligase E3A	Q05086	UBE3A	0.414483	0.116175	0.265329	0.486748
YYRPTEVDFLQGDCTK	GDP-mannose 4,6 dehydratase	O60547	GMDS	1.31648	-1.71306	-0.198289	0.0375667
YYYDRYTQSCR	Tissue factor pathway inhibitor 2	P48307	TFPI2	-1.44142	0.303749	-0.568836	0.199132

## Sheet: III-3 100 µM
Peptide Sequence	Protein Description	Protein ID	Gene	Log2(R) III-3 100 μM_1	Log2(R) III-3 100 μM_2	Media Log2(R) III-3 100 μM	ngtive log10(p)
AAAHHYGAQCDKPNK	NADH dehydrogenase [ubiquinone] 1 alpha subcomplex subunit 8	P51970	NDUFA8	0.619939		0.619939
AAAHHYGAQCDKPNKEFMLCR	NADH dehydrogenase [ubiquinone] 1 alpha subcomplex subunit 8	P51970	NDUFA8		-1.28963	-1.28963
AAAPAPEEEMDECEQALAAEPK	Elongation factor 1-gamma	P26641	EEF1G	0.222856	-0.063517	0.0796696	0.169566
AAAPAPVSEAVCR	Calpastatin	P20810	CAST	0.621939	0.487694	0.554816	1.11551
AACCLAGAR	6-phosphogluconolactonase	O95336	PGLS	-2.85033	-2.2757	-2.56302	1.14831
AACNLLQR	ATP-dependent 6-phosphofructokinase, platelet type	Q01813	PFKP	0.407955	0.0752655	0.24161	0.415835
AACQEAQVFGNQLIPPNAQVK	Acylglycerol kinase, mitochondrial	Q53H12	AGK	2.64298	1.34173	1.99235	0.696922
AADISESSGADCKGDPR	Density-regulated protein	O43583	DENR	-0.543337	-0.555825	-0.549581	2.14072
AAFGLSEAGFNTACVTK	Succinate dehydrogenase [ubiquinone] flavoprotein subunit, mitochondrial	P31040	SDHA	-2.16529		-2.16529
AAHLCAEAALR	Proliferation-associated protein 2G4	Q9UQ80	PA2G4		0.452442	0.452442
AALEACHK	Alcohol dehydrogenase class-3	P11766	ADH5	-0.466572	0.666133	0.0997803	0.0511083
AALEALGSCLNNK	Serine hydroxymethyltransferase, mitochondrial	P34897	SHMT2	3.04622	3.801	3.42361	1.15556
AALGHLAGEAAAAPGPGTPCASR	UPF0488 protein C8orf33	Q9H7E9	C8orf33		0.0364168	0.0364168
AAPCEGQAFAVGVEK	Nuclear-interacting partner of ALK	Q86WB0	ZC3HC1	-0.186164	0.694121	0.253979	0.175994
AAPPGEYFSVGSQVSCR	Protein LSM12 homolog	Q3MHD2	LSM12		1.33598	1.33598
AAQLCGAGMAAVVDR	Hexokinase-2	P52789	HK2	1.32501		1.32501
AATDAQDANQCCTSCEDNAPATSYCVECSEPLCETCVEAHQR	Transcription intermediary factor 1-beta	Q13263	TRIM28	0.959986	1.09081	1.0254	1.39193
AATGANAEKAESHNDCPVR	Uridine phosphorylase 1	Q16831	UPP1	0.373069	0.346401	0.359735	1.62733
AATGEEVSAEDLGGADLHCR	Methylcrotonoyl-CoA carboxylase beta chain, mitochondrial	Q9HCC0	MCCC2		0.34206	0.34206
AAVAAGCR	Cytosol aminopeptidase	P28838	LAP3		0.442053	0.442053
AAVEEGIVLGGGCALLR	60 kDa heat shock protein, mitochondrial	P10809	HSPD1		0.17646	0.17646
AAYCACR	Prolow-density lipoprotein receptor-related protein 1	Q07954	LRP1		1.38874	1.38874
ACARPLISVYSEK	60S ribosomal protein L4	P36578	RPL4	0.240743	0.231405	0.236074	1.90003
ACARPLISVYSEKGESSGK	60S ribosomal protein L4	P36578	RPL4	0.386544	0.389568	0.388056	2.6054
ACDELVEEMEHYGK	Procollagen-lysine,2-oxoglutarate 5-dioxygenase 2	O00469	PLOD2	-0.970872	1.40849	0.218811	0.0534472
ACDLGHIWACANASR	Cytochrome c oxidase assembly factor 7	Q96BR5	COA7	1.80266		1.80266
ACFHCETCK	LIM and SH3 domain protein 1	Q14847	LASP1	-1.23032	0.651574	-0.289374	0.091482
ACGLVASNLNLKPGECLR	Galectin-1	P09382	LGALS1		-0.0656241	-0.0656241
ACGVSRPVIACSVTIK	NHP2-like protein 1	P55769	SNU13	0.663049		0.663049
ACIAEK	Destrin	P60981	DSTN	0.0215942	0.0419368	0.0317655	0.704922
ACQSCPSEPNTAALQAALAR	Importin-4	Q8TEX9	IPO4		1.25057	1.25057
ACQSIYPLHDVFVR	40S ribosomal protein S3a	P61247	RPS3A	-0.0462156	0.627533	0.290659	0.262171
ACYGVLR	40S ribosomal protein S3	P23396	RPS3		0.212543	0.212543
ADFPAGIPECGTDALR	Valine--tRNA ligase	P26640	VARS1	-0.657377		-0.657377
ADIDVSGPKVDVECPDVNIEGPEGK	Neuroblast differentiation-associated protein AHNAK	Q09666	AHNAK		0.320795	0.320795
ADLPPCGACITGR	Cytosolic acyl coenzyme A thioester hydrolase	O00154	ACOT7	-0.144728	-0.635259	-0.389994	0.446851
ADVEDGEETCALASHSGSSGSK	RING-box protein 2	Q9UBF6	RNF7		0.123233	0.123233
AEAGEAGQATAEAECHR	Probable bifunctional dTTP/UTP pyrophosphatase/methyltransferase protein	O95671	ASMTL	1.50551	1.71489	1.6102	1.38371
AEGLEEADTGASGCHSHPEEQPTSISPSR	Melanophilin	Q9BV36	MLPH	0.482832	2.33854	1.41069	0.431352
AENEEAAACPAWER	Microtubule-associated protein 1A	P78559	MAP1A	0.524283	3.72711	2.1257	0.386124
AENHCELLSPAR	BTB/POZ domain-containing protein KCTD5	Q9NXV2	KCTD5		-2.41503	-2.41503
AEPSAATQSHSISSSSFGAEPSAPGGGGSPGACPALGTK	Reticulon-3	O95197	RTN3	0.391519	1.2829	0.837207	0.50664
AEPTESCEQIAVQVNNGDAGR	Nuclear autoantigen Sp-100	P23497	SP100		-0.540038	-0.540038
AESHNDCPVR	Uridine phosphorylase 1	Q16831	UPP1	0.307058	0.349246	0.328152	1.38863
AETEEAEEPEEDGEEHVCVSASK	Microtubule-associated protein 1B	P46821	MAP1B	0.208308		0.208308
AETPHGAEEECKAETPHGAEEECR	Transforming acidic coiled-coil-containing protein 3	Q9Y6A5	TACC3		0.2605	0.2605
AEVCVR	Protein Niban 2	Q96TA1	NIBAN2		-0.715844	-0.715844
AFCSGCLSFSAAVPR	Abscission/NoCut checkpoint regulator	Q96K21	ZFYVE19	-0.290716	-0.603992	-0.447354	0.668744
AFLLDPDRCVVQR	Protein HGH1 homolog	Q9BTY7	HGH1		0.404321	0.404321
AFQNTATACAPVSHYR	Phosphorylated adapter RNA export protein	Q9H814	PHAX	0.856011		0.856011
AFQYVETHGEVCPANWTPDSPTIKPSPAASK	Thioredoxin-dependent peroxide reductase, mitochondrial	P30048	PRDX3	0.44731	0.4421	0.444705	2.42843
AFSPGLPPQSCSLNLK	Fat storage-inducing transmembrane protein 2	Q8N6M3	FITM2	4.79496	5.03069	4.91282	1.81615
AFSPGLPPQSCSLNLKQDSYK	Fat storage-inducing transmembrane protein 2	Q8N6M3	FITM2	2.30684		2.30684
AFSYICR	Protein numb homolog	P49757	NUMB		2.36508	2.36508
AGAIAPCEVTVPAQNTGLGPEK	60S acidic ribosomal protein P0	P05388	RPLP0		0.573018	0.573018
AGCSNIAYPR	Sodium/myo-inositol cotransporter	P53794	SLC5A3		1.18838	1.18838
AGDTVIPLYIPQCGECK	Alcohol dehydrogenase class-3	P11766	ADH5		0.456267	0.456267
AGEPNSPDAEEANSPDVTAGCDPAGVHPPR	RNA cytosine C(5)-methyltransferase NSUN2	Q08J23	NSUN2	0.327396	2.27868	1.30304	0.388114
AGGGPTLQCPPPSSPEK	Lysophospholipid acyltransferase 7	Q96N66	MBOAT7	0.350492	0.990437	0.670464	0.547492
AGKLCVPAMNVNDSVTK	S-adenosylhomocysteine hydrolase-like protein 1	O43865	AHCYL1	0.674557	0.531573	0.603065	1.12425
AGKPVICATQMLESMIK	Pyruvate kinase PKM	P14618	PKM		-1.12205	-1.12205
AGQATEGHCPR	Selenocysteine-specific elongation factor	P57772	EEFSEC		0.642165	0.642165
AGQCVIGLQMGTNK	Calponin-2	Q99439	CNN2	-0.0148156	1.44913	0.717158	0.295413
AGRLPACVVDCGTGYTK	Actin-related protein 3	P61158	ACTR3	0.363165		0.363165
AGSDGESIGNCPFSQR	Chloride intracellular channel protein 4	Q9Y696	CLIC4	-0.0568172	-0.507682	-0.28225	0.367494
AHEILPNLVCCSAK	T-complex protein 1 subunit theta	P50990	CCT8		0.988515	0.988515
AHQLVMEGYNWCHDR	Serine/threonine-protein phosphatase 2A catalytic subunit beta isoform	P62714	PPP2CB	0.221351	0.932156	0.576753	0.45398
AHVVPCFDASK	Filamin-A	P21333	FLNA	-0.413581	-0.885813	-0.649697	0.653813
AIDENNEPTACFLIR	Rabankyrin-5	Q9P2R3	ANKFY1	-0.568958		-0.568958
AILPCIK	Eukaryotic initiation factor 4A-I	P60842	EIF4A1	0.0651115	0.126915	0.0960133	0.702831
AILQHLGLESTCDDSIIVK	Hexokinase-2	P52789	HK2		0.236524	0.236524
AISADSIDGICAR	DCN1-like protein 3	Q8IWE4	DCUN1D3		-1.86312	-1.86312
AITIAGVPQSVTECVK	Poly(rC)-binding protein 1	Q15365	PCBP1		-0.781939	-0.781939
AIVDALPPPCESACTVPTDVDKWFHHQK	Inorganic pyrophosphatase	Q15181	PPA1		-0.283557	-0.283557
AKFENLCK	Heat shock protein HSP 90-beta	P08238	HSP90AB1	0.0755394	-0.242957	-0.083709	0.159954
AKPCGVR	Proteasome activator complex subunit 2	Q9UL46	PSME2	0.647854	0.532369	0.590111	1.20694
ALACSSLQER	Amyloid-beta A4 precursor protein-binding family B member 2	Q92870	APBB2		0.172816	0.172816
ALADLVHSHIQSNELCSK	Ferrochelatase, mitochondrial	P22830	FECH		-0.687857	-0.687857
ALANSLACQGK	Fructose-bisphosphate aldolase A	P04075	ALDOA	-0.22533	-0.412515	-0.318923	0.74059
ALASTCKPELQK	Protein Niban 1	Q9BZQ8	NIBAN1	-0.796821		-0.796821
ALCDLGPWVK	Vitamin K epoxide reductase complex subunit 1-like protein 1	Q8N0U8	VKORC1L1	-0.043909	0.48078	0.218435	0.253381
ALCDVGTAISCSR	Vitamin K epoxide reductase complex subunit 1	Q9BQB6	VKORC1	0.34592	4.0678	2.20686	0.350672
ALCGLDESK	Lon protease homolog, mitochondrial	P36776	LONP1		-1.56821	-1.56821
ALCNGDSKLENAGGDLK	GMP synthase [glutamine-hydrolyzing]	P49915	GMPS		0.481235	0.481235
ALDLDSSCKEAADGYQR	Stress-induced-phosphoprotein 1	P31948	STIP1	-1.68399		-1.68399
ALEFAPACHR	DnaJ homolog subfamily C member 7	Q99615	DNAJC7	0.374348	-1.62804	-0.626847	0.191194
ALEMCPSCFQK	Tetratricopeptide repeat protein 1	Q99614	TTC1		0.687151	0.687151
ALGALAEGCPR	F-box/LRR-repeat protein 15	Q9H469	FBXL15		-0.554151	-0.554151
ALLMCEACR	Replication factor C subunit 3	P40938	RFC3		1.32373	1.32373
ALTNLPHTDFTLCK	Eukaryotic translation initiation factor 3 subunit K	Q9UBQ5	EIF3K		0.443593	0.443593
ALVDGPCTQVR	60S ribosomal protein L14	P50914	RPL14	0.490975	1.2957	0.893335	0.569586
ALVDHENVISCPHLGASTK	D-3-phosphoglycerate dehydrogenase	O43175	PHGDH	0.568445	-0.530727	0.0188587	0.00958862
ALVEFTNSPDCLSK	Exportin-7	Q9UIA9	XPO7		0.897579	0.897579
ALWCSEDKQILSADDK	Serine-threonine kinase receptor-associated protein	Q9Y3F4	STRAP		-0.832922	-0.832922
ANACNSVIK	Sarcoplasmic/endoplasmic reticulum calcium ATPase 2	P16615	ATP2A2	0.0370353	0.795935	0.416485	0.327534
ANEQEPCGWWLAR	Fragile X mental retardation syndrome-related protein 2	P51116	FXR2	2.11893		2.11893
ANGCVANGEVR	Serine palmitoyltransferase 2	O15270	SPTLC2	0.229886		0.229886
ANQGDEACTHCPINSR	Ephrin type-B receptor 2	P29323	EPHB2		0.979976	0.979976
ANSIQGCK	Coiled-coil domain-containing protein 25	Q86WR0	CCDC25	1.22977	1.23566	1.23272	2.8176
ANSSVVSVNCK	Protein O-GlcNAcase	O60502	OGA	-0.0202288		-0.0202288
APCCGADVK	TNF receptor-associated factor 2	Q12933	TRAF2	1.13151	-0.389887	0.370809	0.147977
APGAAAPSSGPGPCAAAR	Phosphatidylinositol 3,4,5-trisphosphate-dependent Rac exchanger 1 protein	Q8TCU6	PREX1		1.5863	1.5863
APPCEYKDWLTK	DNA-dependent protein kinase catalytic subunit	P78527	PRKDC	-0.511569		-0.511569
APQCLGK	Heterogeneous nuclear ribonucleoprotein U	Q00839	HNRNPU	-0.182337	0.0701694	-0.0560839	0.13438
AQCPIVER	40S ribosomal protein S5	P46782	RPS5	-0.0797468	-0.0771095	-0.0784282	1.9705
AQDIQCGLQSR	NudC domain-containing protein 2	Q8WVJ2	NUDCD2		-0.159859	-0.159859
AQEFVNCK	Glutaredoxin-1	P35754	GLRX	-0.124697	-0.111852	-0.118274	1.46173
AQQEQLLLQKQLQQQQQQPPSQLCTAPASSHER	A-kinase anchor protein 2	Q9Y2D5	AKAP2		4.34732	4.34732
AQTPPGPSLSGSKSPCPQEK	Serine/arginine repetitive matrix protein 2	Q9UQ35	SRRM2	1.27251		1.27251
ARHGFCGIPITDTGR	Inosine-5'-monophosphate dehydrogenase 2	P12268	IMPDH2		-0.506668	-0.506668
ARLCSSSSSDTSSR	Nuclear-interacting partner of ALK	Q86WB0	ZC3HC1		3.21521	3.21521
ARPCIIPENEEIPR	LIM and senescent cell antigen-like-containing domain protein 3	P0CW19	LIMS3	1.52312	0.727752	1.12543	0.66507
ASCASIDIEDATQHLR	Enhancer of mRNA-decapping protein 4	Q6P2E9	EDC4		2.18499	2.18499
ASCLYGQLPK	Glutathione S-transferase P	P09211	GSTP1	0.190052	0.220393	0.205222	1.32813
ASFENNCEIGCFAK	Eukaryotic translation initiation factor 6	P56537	EIF6	-0.0113986	-0.165723	-0.088561	0.340767
ASGCEGEDVVTLLK	Hexokinase-2	P52789	HK2	0.554153	0.664243	0.609198	1.24134
ASGQPAGPDNKENCPVPGKPGEAVAAR	Thymidine kinase, cytosolic	P04183	TK1	0.490908	1.37229	0.931599	0.550841
ASGVQVADEVCR	Destrin	P60981	DSTN	0.0968876	0.0910993	0.0939934	1.70783
ASHNNTQIQVVSASNEPLAFASCGTEGFR	28S ribosomal protein S11, mitochondrial	P82912	MRPS11		0.704659	0.704659
ASTASPCNNNINAATAVALQEPR	La-related protein 4	Q71RC2	LARP4		2.56406	2.56406
ASTDTMGRPCLPWNSATVLQQTYHAHR	Urokinase-type plasminogen activator	P00749	PLAU		2.74449	2.74449
ASTTTCTR	Calcium/calmodulin-dependent protein kinase type II subunit delta	Q13557	CAMK2D	0.0997022	0.332286	0.215994	0.502484
ASVGECPAPVPVK	ATP synthase subunit f, mitochondrial	P56134	ATP5MF	0.555756	0.0192081	0.287482	0.320567
ASVGECPAPVPVKDK	ATP synthase subunit f, mitochondrial	P56134	ATP5MF		-0.384777	-0.384777
ASVGFGGSCFQK	UDP-glucose 6-dehydrogenase	O60701	UGDH		0.700876	0.700876
ATCAPQHGAPGPGPADASK	Filamin-A	P21333	FLNA	0.429908	-0.127647	0.15113	0.165106
ATDCVGHDVVTLLR	Hexokinase-1	P19367	HK1		-0.239976	-0.239976
ATDYGPEEVCER	TSC22 domain family protein 2	O75157	TSC22D2		0.453497	0.453497
ATFHTPFSHLGQSPEGCSSYTFPK	Enoyl-CoA delta isomerase 2, mitochondrial	O75521	ECI2		1.65907	1.65907
ATHGQTCARPMCIPPSYADLGK	Voltage-dependent anion-selective channel protein 2	P45880	VDAC2	2.42812	1.92201	2.17506	1.13232
ATPSCPPEMK	Transmembrane protein 214	Q6NUQ4	TMEM214		1.76423	1.76423
ATQAHSLSYAGCNFLR	RNA 3'-terminal phosphate cyclase-like protein	Q9Y2P8	RCL1		2.23808	2.23808
ATQRPPYCDGTHR	CDGSH iron-sulfur domain-containing protein 3, mitochondrial	P0C7P0	CISD3		1.37908	1.37908
ATVFLNPAACK	Acylglycerol kinase, mitochondrial	Q53H12	AGK	0.323824	0.364515	0.344169	1.42492
AVALSSSVMCPDAR	Progranulin	P28799	GRN	2.35576		2.35576
AVASQLDCNFLK	26S proteasome regulatory subunit 10B	P62333	PSMC6	0.195543	0.247718	0.22163	1.12731
AVECPPPR	Lysine--tRNA ligase	Q15046	KARS1	1.68494		1.68494
AVELLGDIVQNCSLEDSQIEKER	Cytochrome b-c1 complex subunit 1, mitochondrial	P31930	UQCRC1		1.1286	1.1286
AVGIWHCGSCMK	60S ribosomal protein L37a	P61513	RPL37A	0.791462	0.854487	0.822974	1.61324
AVLCPQPTR	Ras-related C3 botulinum toxin substrate 2	P15153	RAC2	0.566546	0.70609	0.636318	1.15785
AVLFCLSEDKK	Cofilin-1	P23528	CFL1	-1.60695	-0.508304	-1.05763	0.515747
AVLGEVKLCEK	Elongation factor 1-gamma	P26641	EEF1G	-0.106885	0.0611551	-0.0228649	0.0804781
AVLHLC	ER membrane protein complex subunit 8	O43402	EMC8		-0.228412	-0.228412
AVVMISCNR	Cation-dependent mannose-6-phosphate receptor	P20645	M6PR		-0.85702	-0.85702
AVYSTNCPVWEEAFR	Extended synaptotagmin-1	Q9BSJ8	ESYT1		1.63313	1.63313
AVYTQDCPLAAAK	Alanine--tRNA ligase, cytoplasmic	P49588	AARS1	-0.110534	0.381826	0.135646	0.167881
AWASNCQFSHNTR	Glioma pathogenesis-related protein 1	P48060	GLIPR1		0.946352	0.946352
AWCVNCFACSTCNTK	LIM and senescent cell antigen-like-containing domain protein 1	P48059	LIMS1	-0.86267	-3.23813	-2.0504	0.475931
AWLVSSGCPLQVK	SURP and G-patch domain-containing protein 2	Q8IX01	SUGP2	-2.29611	0.645018	-0.825546	0.171118
AWNAVCPLVVR	Protein FAM49A	Q9H0Q0	FAM49A		0.00052875	0.00052875
AWNAYPYCR	Phosphatidylinositol transfer protein beta isoform	P48739	PITPNB	0.712529	1.37631	1.04442	0.708016
AYCEGCYVATLEK	Thyroid receptor-interacting protein 6	Q15654	TRIP6	-0.217631	-0.129975	-0.173803	0.803385
AYCEPCYINTLEQCNVCSKPIMER	Lipoma-preferred partner	Q93052	LPP	0.204756		0.204756
AYEYVECPIR	Cytochrome c-type heme lyase	P53701	HCCS	0.232968	0.557168	0.395068	0.605768
AYGGSMCAK	60S ribosomal protein L34	P49207	RPL34	-0.194908	0.121788	-0.0365602	0.0677571
AYHEQLSVAEITNACFEPANQMVK	Tubulin alpha-4A chain	P68366	TUBA4A		0.655427	0.655427
AYHEQLTVAEITNACFEPANQMVK	Tubulin alpha-1C chain	Q9BQE3	TUBA1C		-1.35576	-1.35576
AYHPGCFTCVVCHR	Thyroid receptor-interacting protein 6	Q15654	TRIP6		-0.190858	-0.190858
AYHSFLVEPISCHAWNKDR	Actin-related protein 2/3 complex subunit 1B	O15143	ARPC1B	-0.0441618	0.166356	0.0610972	0.177054
CAAEENCLASTAYR	Protein-lysine 6-oxidase	P28300	LOX		1.85455	1.85455
CAASAAEESGAGKK	SH2 domain-containing adapter protein B	Q15464	SHB		2.35123	2.35123
CACPTNFYLGSDGR	Prolow-density lipoprotein receptor-related protein 1	Q07954	LRP1	2.60161	1.5772	2.0894	0.815181
CAGAPQK	Sulfide:quinone oxidoreductase, mitochondrial	Q9Y6N5	SQOR	0.0136653	0.155165	0.0844149	0.352541
CAGCTNPISGLGGTK	Four and a half LIM domains protein 2	Q14192	FHL2	3.69238	0.730345	2.21136	0.425179
CAGDWLPR	Alpha-1,3/1,6-mannosyltransferase ALG2	Q9H553	ALG2	0.816195	1.05	0.933097	1.10048
CAGNEDIITLR	Proliferating cell nuclear antigen	P12004	PCNA	-0.00355979	-0.251877	-0.127718	0.308916
CANCFDCPGCMHTLSTR	Dynactin subunit 4	Q9UJW0	DCTN4	-0.775625		-0.775625
CAQGCICK	Metallothionein-2	P02795	MT2A		-0.167411	-0.167411
CAQYWPQKEEK	Tyrosine-protein phosphatase non-receptor type 1	P18031	PTPN1	0.496673	0.646426	0.571549	1.08129
CASCPYLGMPAFKPGEK	Anamorsin	Q6FI81	CIAPIN1		0.635601	0.635601
CASQSGMTAYGTR	Calponin-2	Q99439	CNN2	1.09426	1.80954	1.4519	0.81317
CASQVGMTAPGTR	Calponin-2	Q99439	CNN2	1.26877	1.25872	1.26374	2.59637
CAVVGNSGNLR	CMP-N-acetylneuraminate-beta-galactosamide-alpha-2,3-sialyltransferase 1	Q11201	ST3GAL1		1.43782	1.43782
CCCVADR	Succinate dehydrogenase [ubiquinone] flavoprotein subunit, mitochondrial	P31040	SDHA	-0.910889	-0.51749	-0.714189	0.766766
CCGLCVCPCNR	Synaptosomal-associated protein 23	O00161	SNAP23	1.13063	-0.420153	0.35524	0.138761
CCLTYCFNKPEDK	Ubiquitin-40S ribosomal protein S27a	P62979	RPS27A	0.122285	0.229769	0.176027	0.724362
CCSGAIIVLTK	Pyruvate kinase PKM	P14618	PKM	-0.463982	-0.449265	-0.456624	1.98892
CCTESLVNR	Serum albumin	P02768	ALB	0.686965	0.888023	0.787494	1.09242
CDKVAQDLCK	Electron transfer flavoprotein subunit alpha, mitochondrial	P13804	ETFA	0.955524		0.955524
CDLHRLEEGPPVTTVLTR	Pyruvate dehydrogenase E1 component subunit alpha, somatic form, mitochondrial	P08559	PDHA1	0.0984691	0.896493	0.497481	0.366174
CDMDQFQCK	Prolow-density lipoprotein receptor-related protein 1	Q07954	LRP1	1.75688		1.75688
CDPVDYSNSPEALR	Elongation of very long chain fatty acids protein 1	Q9BW60	ELOVL1		0.438421	0.438421
CDSSPDSAEDVR	Alpha-2-HS-glycoprotein	P02765	AHSG	0.465885	0.140757	0.303321	0.504164
CDSSPDSAEDVRK	Alpha-2-HS-glycoprotein	P02765	AHSG	1.05867	0.964502	1.01159	1.52855
CDVDIR	Actin, cytoplasmic 1	P60709	ACTB	0.136016	0.211306	0.173661	0.866787
CDVDIRK	Actin, cytoplasmic 1	P60709	ACTB	0.171114	0.208505	0.18981	1.2041
CEDCGKPLSIEADDNGCFPLDGHVLCR	Zyxin	Q15942	ZYX	-0.329711	0.028949	-0.150381	0.255118
CEIDPMFQK	Condensin complex subunit 2	Q15003	NCAPH	1.04368		1.04368
CEIEATLER	Mitogen-activated protein kinase kinase kinase 20	Q9NYL2	MAP3K20		0.548123	0.548123
CEMSEHPSQTVR	Leucine-rich repeat flightless-interacting protein 1	Q32MZ4	LRRFIP1	1.27723		1.27723
CENVQPSGSFK	Serine dehydratase-like	Q96GA7	SDSL	0.187168	-0.181396	0.00288594	0.00435117
CESAFLSK	60S ribosomal protein L24	P83731	RPL24	0.340633	0.0566944	0.198664	0.403398
CESAPGCGVWQRPVIDNPNYK	Calnexin	P27824	CANX		0.267713	0.267713
CEWLLR	Fat storage-inducing transmembrane protein 2	Q8N6M3	FITM2	0.633444	0.230237	0.43184	0.555861
CFAGLLNK	MMS19 nucleotide excision repair protein homolog	Q96T76	MMS19		2.47107	2.47107
CFCPSPR	Neurogenic locus notch homolog protein 2	Q04721	NOTCH2		1.03976	1.03976
CFFDIAINNQPAGR	Peptidyl-prolyl cis-trans isomerase G	Q13427	PPIG		-0.711483	-0.711483
CFIVGADNVGSK	60S acidic ribosomal protein P0	P05388	RPLP0		-0.551646	-0.551646
CFNDLKAEELLLK	Caspase-6	P55212	CASP6		-0.329413	-0.329413
CFQETIGSQCGK	Latent-transforming growth factor beta-binding protein 1	Q14766	LTBP1	0.283124	-0.190941	0.0460913	0.0566371
CGAALAGHQLIR	DNA-dependent protein kinase catalytic subunit	P78527	PRKDC		-0.313801	-0.313801
CGADWEEYIK	Damage-control phosphatase ARMT1	Q9H993	ARMT1	0.772265		0.772265
CGAETQHEGLELR	Prolactin regulatory element-binding protein	Q9HCU5	PREB		2.27938	2.27938
CGDLVFAK	Hepatoma-derived growth factor	P51858	HDGF		-0.013931	-0.013931
CGEDDETIPSEYR	Calpastatin	P20810	CAST	1.03198	1.80766	1.41982	0.77017
CGEMAQAASAAVTR	Valine--tRNA ligase	P26640	VARS1	3.3578	0.515153	1.93648	0.394603
CGENTSPVLDAVLK	Histone-lysine N-methyltransferase SETD2	Q9BYW2	SETD2	0.954403		0.954403
CGESGHLAK	Cellular nucleic acid-binding protein	P62633	CNBP		-2.42475	-2.42475
CGESGHLAR	Cellular nucleic acid-binding protein	P62633	CNBP		-0.203275	-0.203275
CGETGHVAINCSK	Cellular nucleic acid-binding protein	P62633	CNBP	-4.00176		-4.00176
CGFCHVGEEENEAR	PHD finger protein 6	Q8IWS0	PHF6	1.92724		1.92724
CGFLPGNEK	Proteasome activator complex subunit 2	Q9UL46	PSME2	0.59915	0.50094	0.550045	1.24654
CGGIDKR	Elongation factor 1-alpha 1	P68104	EEF1A1	0.316751	0.0725439	0.194648	0.447733
CGHTNNLRPK	Ubiquitin-60S ribosomal protein L40	P62987	UBA52	0.444647		0.444647
CGIPEALVQR	SAM and SH3 domain-containing protein 1	O94885	SASH1	-0.778038		-0.778038
CGIQFLHLPK	Glutathione S-transferase C-terminal domain-containing protein	Q8NEC7	GSTCD	2.7049	1.48852	2.09671	0.745376
CGNQAAIMELDDTLK	Serine/threonine-protein phosphatase 2A catalytic subunit beta isoform	P62714	PPP2CB	0.146907	0.227052	0.186979	0.871586
CGQAVCGK	WD repeat and FYVE domain-containing protein 1	Q8IWB7	WDFY1		-0.865854	-0.865854
CGSGPVHISGQHLVAVEEDAESEDEEEEDVK	Nucleophosmin	P06748	NPM1		1.87001	1.87001
CGSKDNIK	Microtubule-associated protein 4	P27816	MAP4	1.04563	0.949489	0.997557	1.51354
CGSSEDLHDSVR	Hepatoma-derived growth factor-related protein 2	Q7Z4V5	HDGFL2	2.19184	-0.385538	0.903149	0.214068
CGSVLVR	40S ribosomal protein S2	P15880	RPS2	0.115133	0.0496096	0.0823712	0.617998
CGVISPR	40S ribosomal protein S15a	P62244	RPS15A	0.324756	0.331658	0.328207	2.17435
CGVTSVPDIR	Integrin-linked kinase-associated serine/threonine phosphatase 2C	Q9H0C8	ILKAP	0.417105	-0.250393	0.0833559	0.0735608
CHTIMNCTR	Succinate dehydrogenase [ubiquinone] iron-sulfur subunit, mitochondrial	P21912	SDHB	-0.188291	0.119657	-0.0343171	0.0653025
CHTPPLYR	60S ribosomal protein L18a	Q02543	RPL18A	0.273521	0.290988	0.282254	1.70571
CHVPLAQAQALVTSELEK	Protein FAM136A	Q96C01	FAM136A		-5.63902	-5.63902
CIANGVTSK	Stanniocalcin-1	P52823	STC1	1.82925	2.30722	2.06823	1.13527
CIELCCGSVK	Sodium/potassium-transporting ATPase subunit alpha-1	P05023	ATP1A1	1.11078	0.926404	1.01859	1.24062
CIGENFAYVQIK	Lanosterol 14-alpha demethylase	Q16850	CYP51A1	1.38175		1.38175
CIGPGCCHVAQPDSVYCSNDCILK	Death-inducer obliterator 1	Q9BTC0	DIDO1	1.46446		1.46446
CILAGDPAVGK	Intraflagellar transport protein 27 homolog	Q9BW83	IFT27	0.400791	0.860891	0.630841	0.652443
CILDAFK	Antiviral innate immune response receptor RIG-I	O95786	DDX58	2.49325		2.49325
CININWR	Prolow-density lipoprotein receptor-related protein 1	Q07954	LRP1	0.689079		0.689079
CIPALDSLTPANEDQK	60 kDa heat shock protein, mitochondrial	P10809	HSPD1	-0.845889	0.754594	-0.0456474	0.0160468
CIPLWVGAR	Transmembrane protein 147	Q9BVK8	TMEM147	-0.242891		-0.242891
CISEVQANNVVLGQYVGNPDGEGEATK	Glucose-6-phosphate 1-dehydrogenase	P11413	G6PD	-0.509283	-0.0562336	-0.282758	0.366542
CIVSPAGR	Lysophospholipase-like protein 1	Q5VWZ2	LYPLAL1		-2.43228	-2.43228
CKDISSALR	Ribonuclease inhibitor	P13489	RNH1		1.20184	1.20184
CKELFPIQMEGVK	Mitochondrial import receptor subunit TOM40 homolog	O96008	TOMM40	7.01128		7.01128
CKELGITALHIK	40S ribosomal protein S14	P62263	RPS14	-0.0780871	-0.00487206	-0.0414796	0.33693
CKGGFAPAEK	LIM and senescent cell antigen-like-containing domain protein 1	P48059	LIMS1		-1.22206	-1.22206
CKHFELGGDK	60S ribosomal protein L36a	P83881	RPL36A	-0.952301	-0.333504	-0.642903	0.544321
CKPDKLPLFK	39S ribosomal protein S30, mitochondrial	Q9NP92	MRPS30	1.55716	1.80661	1.68188	1.32675
CKPSQGLSTEENLSASITK	Transmembrane anterior posterior transformation protein 1 homolog	Q6NXT6	TAPT1		-0.0842262	-0.0842262
CKQGLPAFR	Cartilage-associated protein	O75718	CRTAP	3.11627	1.70464	2.41045	0.741503
CLADAVVK	MIC	Q5TGZ0	MICOS10	0.498218	0.455576	0.476897	1.54603
CLALATHDNPLR	Sarcoplasmic/endoplasmic reticulum calcium ATPase 2	P16615	ATP2A2	1.41165	-0.448462	0.481594	0.157499
CLAPGGGR	Rho guanine nucleotide exchange factor 40	Q8TER5	ARHGEF40		0.873933	0.873933
CLCVEGYAPR	Prolow-density lipoprotein receptor-related protein 1	Q07954	LRP1	-0.226631	0.569324	0.171347	0.130077
CLCYDGFMASEDMK	Fibrillin-1	P35555	FBN1	1.1816		1.1816
CLEEGKLVNK	NADH dehydrogenase [ubiquinone] 1 alpha subcomplex subunit 8	P51970	NDUFA8	0.663736	1.10044	0.882087	0.81112
CLEGACVVNK	Prolow-density lipoprotein receptor-related protein 1	Q07954	LRP1	0.42903	0.601814	0.515422	0.975827
CLEKVDAFEER	Thiopurine S-methyltransferase	P51580	TPMT	2.27231	0.509796	1.39105	0.444301
CLEPTVALLR	Protein CIP2A	Q8TCG1	CIP2A	0.261722	0.662958	0.46234	0.583972
CLGIPTR	Protein-glutamine gamma-glutamyltransferase 2	P21980	TGM2	-0.68258	-0.859592	-0.771086	1.13815
CLHDIALAHR	Proline-rich AKT1 substrate 1	Q96B36	AKT1S1		0.582034	0.582034
CLHNNNFENALCR	Cytochrome c oxidase assembly protein COX19	Q49B96	COX19	0.358865		0.358865
CLKNEYVENR	COX assembly mitochondrial protein 2 homolog	Q9NRP2	CMC2	-0.102256	-0.0611669	-0.0817115	0.804615
CLLIHPNPESALNEEAGR	Ubiquitin-conjugating enzyme E2 S	Q16763	UBE2S	1.48076	1.95901	1.71989	1.05577
CLLQIQASSGESK	Mitochondrial carnitine/acylcarnitine carrier protein	O43772	SLC25A20		2.77299	2.77299
CLMDQATDPNILGR	DNA-dependent protein kinase catalytic subunit	P78527	PRKDC	-1.69313	-1.32478	-1.50896	1.11172
CLNNLAASQLK	Peptidyl-prolyl cis-trans isomerase FKBP8	Q14318	FKBP8	0.644511	0.870048	0.75728	1.02637
CLPGFLGDR	Prolow-density lipoprotein receptor-related protein 1	Q07954	LRP1	0.6432	0.182789	0.412994	0.489819
CLPPPSIR	Serine palmitoyltransferase 1	O15269	SPTLC1	0.51119	0.756937	0.634063	0.914144
CLPTPK	60S ribosomal protein L18a	Q02543	RPL18A	0.157762		0.157762
CLQAGMNLEAR	Glucocorticoid receptor	P04150	NR3C1		1.86821	1.86821
CLQPYQLLVNSK	Melanophilin	Q9BV36	MLPH	-0.42346	-0.262651	-0.343055	0.833973
CLSHHVADAYTSSQK	Torsin-1A-interacting protein 2	Q8NFQ8	TOR1AIP2	1.5059	2.18162	1.84376	0.937881
CLSSSLR	Prolow-density lipoprotein receptor-related protein 1	Q07954	LRP1	0.839955	1.31492	1.07744	0.85977
CLVPEVTFR	Enhancer of mRNA-decapping protein 3	Q96F86	EDC3	0.207175	-0.411588	-0.102206	0.0986105
CLYASVLTAQPR	Elongation factor 2	P13639	EEF2		0.294374	0.294374
CMPTFQFFK	Thioredoxin	P10599	TXN	-0.0650184	0.118547	0.0267643	0.0865215
CMPTFQFFKK	Thioredoxin	P10599	TXN	0.314656	0.109401	0.212028	0.542147
CNAEEHVR	Lysosome-associated membrane glycoprotein 1	P11279	LAMP1	1.96375	1.03884	1.5013	0.720718
CNFYDNKDLECVTNLQEVAR	Lysosomal protective protein	P10619	CTSA	0.661697	0.488327	0.575012	1.02111
CNTCGEPITDR	Zyxin	Q15942	ZYX	0.900013		0.900013
CNTNTAIELK	Histone acetyltransferase type B catalytic subunit	O14929	HAT1		-0.107637	-0.107637
CNTPTYCDLGK	Voltage-dependent anion-selective channel protein 3	Q9Y277	VDAC3	-0.0622625	0.486868	0.212303	0.235843
CNYLALVGGGK	WD repeat domain phosphoinositide-interacting protein 3	Q5MNZ6	WDR45B	5.23274	4.50306	4.8679	1.32217
CNYSQSER	Zinc finger CCCH-type antiviral protein 1	Q7Z2W4	ZC3HAV1	0.235257	-0.622721	-0.193732	0.136703
CPASEPGLDATTASESR	Inverted formin-2	Q27J81	INF2		-0.0537292	-0.0537292
CPENAFFLDHVR	Unconventional myosin-Ic	O00159	MYO1C	-1.58735		-1.58735
CPFTGNVSIR	40S ribosomal protein S11	P62280	RPS11	0.343825	0.0286492	0.186237	0.349619
CPIQLNEGVSFQDLDTAK	UPF0600 protein C5orf51	A6NDU8	C5orf51		1.1562	1.1562
CPLNYFACPSGR	Prolow-density lipoprotein receptor-related protein 1	Q07954	LRP1	1.10504	0.721851	0.913446	0.880669
CQGSGDDNLTSLGTLNFPGR	Glucocorticoid receptor	P04150	NR3C1		4.06246	4.06246
CQNALQQVTAR	Glutamine--fructose-6-phosphate aminotransferase [isomerizing] 2	O94808	GFPT2	-0.0221729	0.538387	0.258107	0.278846
CQNALQQVVAR	Glutamine--fructose-6-phosphate aminotransferase [isomerizing] 1	Q06210	GFPT1	-0.306228	0.503436	0.0986041	0.0716546
CQNEQLQTAVTQQVSQIQQHK	General vesicular transport factor p115	O60763	USO1	0.520778	2.04582	1.2833	0.466846
CQPNEHNCLGTELCVPMSR	Prolow-density lipoprotein receptor-related protein 1	Q07954	LRP1		-1.24034	-1.24034
CQQLQQEYSR	CDK5 regulatory subunit-associated protein 3	Q96JB5	CDK5RAP3	-0.399317	-0.120498	-0.259908	0.503867
CQQPIGTK	Four and a half LIM domains protein 2	Q14192	FHL2	-0.697691	-0.749796	-0.723743	1.64004
CQQVLEPPYDEMFAAHLR	PCI domain-containing protein 2	Q5JVF3	PCID2		1.17693	1.17693
CQSSCGQVK	Neurogenic locus notch homolog protein 2	Q04721	NOTCH2		-1.11328	-1.11328
CQTSMDELLK	STE20/SPS1-related proline-alanine-rich protein kinase	Q9UEW8	STK39	1.00681	0.436465	0.721636	0.620542
CQVFEETQIGGER	T-complex protein 1 subunit eta	Q99832	CCT7	-4.30549	-1.4065	-2.856	0.524345
CQYVTEK	Fructose-bisphosphate aldolase A	P04075	ALDOA	-2.75949	-0.454357	-1.60692	0.402183
CRDPHHDYCEDWPEAQR	ER membrane protein complex subunit 8	O43402	EMC8		-0.73324	-0.73324
CSAALASR	Vitamin K epoxide reductase complex subunit 1-like protein 1	Q8N0U8	VKORC1L1	2.15758		2.15758
CSALATQYMHCVNHAK	MIC	Q9NX63	CHCHD3	0.0116864	0.74325	0.377468	0.309812
CSASCCEDSQASMK	Protein FAM136A	Q96C01	FAM136A	0.733606	0.309866	0.521736	0.609823
CSCPLGYTGK	Neurogenic locus notch homolog protein 2	Q04721	NOTCH2		-1.12007	-1.12007
CSDFTEEICR	Isocitrate dehydrogenase [NAD] subunit alpha, mitochondrial	P50213	IDH3A	0.110188	-0.630562	-0.260187	0.214574
CSEQVQDFTK	COX assembly mitochondrial protein homolog	Q7Z7K0	CMC1		0.69964	0.69964
CSGDGVGAPR	Protein phosphatase 1G	O15355	PPM1G	0.239276	0.14538	0.192328	0.816957
CSGLSEYNAFWK	Transmembrane protein 147	Q9BVK8	TMEM147		1.8933	1.8933
CSGPGLSPGMVR	Filamin-A	P21333	FLNA		-1.27133	-1.27133
CSHLLVK	Peptidyl-prolyl cis-trans isomerase NIMA-interacting 1	Q13526	PIN1	-0.133923	-0.082413	-0.108168	0.827368
CSICATTLR	[F-actin]-monooxygenase MICAL2	O94851	MICAL2		5.96932	5.96932
CSILAAANPAYGR	DNA replication licensing factor MCM7	P33993	MCM7		-1.96485	-1.96485
CSKEVATAIR	40S ribosomal protein S2	P15880	RPS2	0.0987428	0.480596	0.289669	0.430631
CSKICEPGYSPTYK	Cathepsin B	P07858	CTSB	0.830215	0.775316	0.802765	1.66234
CSKICEPGYSPTYKQDK	Cathepsin B	P07858	CTSB	1.65717	2.25474	1.95595	1.01546
CSLPAEEDSVLEK	Microtubule-associated protein 4	P27816	MAP4	0.228128	0.304756	0.266442	1.04133
CSLQAAAILDANDAHQTETSSSQVK	Signal recognition particle subunit SRP68	Q9UHB9	SRP68		1.0109	1.0109
CSLSLVGR	Four and a half LIM domains protein 2	Q14192	FHL2	-0.122242	-0.219316	-0.170779	0.753785
CSPIGVYTSGK	DNA replication licensing factor MCM5	P33992	MCM5	0.0675113	0.576319	0.321915	0.370832
CSPSESPLMEK	Sodium-dependent phosphate transporter 1	Q8WUM9	SLC20A1	-0.396788	2.36265	0.982932	0.21758
CSQAVYAAEK	Cysteine and glycine-rich protein 1	P21291	CSRP1	-1.10426	-0.82966	-0.966958	1.04676
CSSTLLPGAYENGPEEGTFVCAEHCAR	MICAL-like protein 1	Q8N3F8	MICALL1		1.39474	1.39474
CSTPEEIK	Destrin	P60981	DSTN	0.084479	0.0885065	0.0864927	1.82917
CSTPEEIKK	Destrin	P60981	DSTN	2.9176	0.658887	1.78824	0.445386
CSTPEEIKKR	Destrin	P60981	DSTN	0.144134	0.398812	0.271473	0.554056
CSVCGGAIMPEPGQEETVR	Thyroid receptor-interacting protein 6	Q15654	TRIP6	0.0535725	-0.970308	-0.458368	0.271554
CSVCKEPIMPAPGQEETVR	Lipoma-preferred partner	Q93052	LPP	-1.26159		-1.26159
CSVCPDYDLCSVCEGK	Sequestosome-1	Q13501	SQSTM1	-0.243224	-0.287024	-0.265124	1.2801
CSVSAVNLPK	MAP7 domain-containing protein 1	Q3KQU3	MAP7D1	1.36556		1.36556
CSWLVPSPK	Inactive hydroxysteroid dehydrogenase-like protein 1	Q3SXM5	HSDL1	0.867762	0.916634	0.892198	1.75866
CTAYFEGSR	Prolow-density lipoprotein receptor-related protein 1	Q07954	LRP1	0.691575	0.649447	0.670511	1.69912
CTCGQGYQLSAAK	Latent-transforming growth factor beta-binding protein 1	Q14766	LTBP1	-0.934534		-0.934534
CTEIVDQFVCK	Protein Wnt-5a	P41221	WNT5A		0.571075	0.571075
CTFTSPK	Protein wntless homolog	Q5T9L3	WLS	-0.208211	0.835198	0.313493	0.183403
CTGGCAR	Transmembrane 4 L6 family member 4	P48230	TM4SF4	-0.0375588		-0.0375588
CTGGEVGATSALAPK	60S ribosomal protein L12	P30050	RPL12		2.09051	2.09051
CTHWAEGGK	C-1-tetrahydrofolate synthase, cytoplasmic	P11586	MTHFD1	0.645521	0.459313	0.552417	0.973482
CTKPDCPFTHVSR	Zinc finger CCCH domain-containing protein 14	Q6PJT7	ZC3H14		-2.09438	-2.09438
CTLAEK	Cofilin-1	P23528	CFL1		-0.330265	-0.330265
CTLHPNDSLAMEGPLSR	Lethal(2) giant larvae protein homolog 1	Q15334	LLGL1		-0.415539	-0.415539
CTMHCNDK	Protein FAM136A	Q96C01	FAM136A	6.49037	2.62888	4.55963	0.593462
CTNCAR	40S ribosomal protein S26	P62854	RPS26	-0.0151318		-0.0151318
CVAEALLCNGQDDCGDSSDER	Prolow-density lipoprotein receptor-related protein 1	Q07954	LRP1		-0.522722	-0.522722
CVANNQVETLEK	Leucine-rich PPR motif-containing protein, mitochondrial	P42704	LRPPRC		-1.73713	-1.73713
CVDDHMHLIPTMTK	Protein FAM136A	Q96C01	FAM136A	1.40319		1.40319
CVDFQTLK	DNA replication licensing factor MCM5	P33992	MCM5		0.126838	0.126838
CVDKSWIPEGVVR	Ras-related protein Rab-27A	P51159	RAB27A		0.91595	0.91595
CVEENNGVAK	Neutral amino acid transporter B(0)	Q15758	SLC1A5		1.10989	1.10989
CVFEMPNENDKLNDMEPSK	Vesicle-associated membrane protein-associated protein A	Q9P0L0	VAPA	0.601864	0.375095	0.48848	0.838036
CVGAELGLDCPGRDYPNICAGTDR	Uridine phosphorylase 1	Q16831	UPP1	0.511297	0.424928	0.468112	1.23237
CVICGGPGVSDAYYCK	PHD finger-like domain-containing protein 5A	Q7RTV0	PHF5A	-1.18654	0.407675	-0.389432	0.148322
CVLPEEDSGELAKPK	Serine-threonine kinase receptor-associated protein	Q9Y3F4	STRAP	-0.148869	0.540438	0.195785	0.1732
CVLPHMIER	Dehydrogenase/reductase SDR family member 7	Q9Y394	DHRS7	0.870982	0.551043	0.711013	0.851132
CVPKDK	40S ribosomal protein S26	P62854	RPS26	-0.353009		-0.353009
CVSSPHFQVAER	Serine/threonine-protein phosphatase 2A 56 kDa regulatory subunit epsilon isoform	Q16537	PPP2R5E	2.22482	0.152411	1.18861	0.340601
CVSWMCTR	WD repeat and FYVE domain-containing protein 1	Q8IWB7	WDFY1		-2.90386	-2.90386
CVVVGDGAVGK	Ras-related C3 botulinum toxin substrate 2	P15153	RAC2	0.3295	-0.156431	0.0865343	0.106693
CVWSPLASPSTSILKR	Telomere-associated protein RIF1	Q5UIP0	RIF1		0.254471	0.254471
CWAAGWPR	Paxillin	P49023	PXN		0.685427	0.685427
CYADTMFSLLGKK	Thiopurine S-methyltransferase	P51580	TPMT		1.63625	1.63625
CYEKFPLELK	LIM and senescent cell antigen-like-containing domain protein 1	P48059	LIMS1	0.365461		0.365461
CYEMASHLR	Profilin-1	P07737	PFN1	-0.895417	-1.82922	-1.36232	0.677368
DACLNAR	Sarcoplasmic/endoplasmic reticulum calcium ATPase 2	P16615	ATP2A2		0.924645	0.924645
DACVISSDFHER	Transmembrane 9 superfamily member 2	Q99805	TM9SF2	2.14901	0.765185	1.4571	0.549391
DAGGKSWCPDCVQAEPVVR	Thioredoxin domain-containing protein 17	Q9BRA2	TXNDC17	0.1693	0.121862	0.145581	0.987929
DAWASPCHSYPLVATR	Beta-2-syntrophin	Q13425	SNTB2	-2.96127		-2.96127
DCGGAAQLAGPAAEADPLGR	E3 ubiquitin-protein ligase RNF114	Q9Y508	RNF114	0.46537	-0.538545	-0.0365873	0.0205977
DCHEEVYAGSHQYPGR	Golgi resident protein GCP60	Q9H3P7	ACBD3	-3.63896	-0.204628	-1.92179	0.333258
DCLIPMGITSENVAER	3-ketoacyl-CoA thiolase, peroxisomal	P09110	ACAA1		-0.866905	-0.866905
DCLTQACSALTGK	ADP-ribosylation factor-related protein 1	Q13795	ARFRP1	1.77394	1.61675	1.69534	1.53029
DCRDWSDEPIKECGTNECLDNNGGCSHVCNDLK	Low-density lipoprotein receptor	P01130	LDLR		1.85632	1.85632
DDDIAALVVDNGSGMCK	Actin, cytoplasmic 1	P60709	ACTB		1.99846	1.99846
DEFTNTCPSDKEVEIAYSDVAK	Chloride intracellular channel protein 4	Q9Y696	CLIC4	-0.282023	-0.363924	-0.322973	1.09534
DEGLCSANVTR	Tissue factor pathway inhibitor 2	P48307	TFPI2	3.9801	0.656009	2.31805	0.402298
DFGYGVEEEEEEAAAAGGGVGAGAGGGCGPGGADSSKPR	Ras-related GTP-binding protein C	Q9HB90	RRAGC		0.753055	0.753055
DFTPVCTTELGR	Peroxiredoxin-6	P30041	PRDX6	0.396664	-0.0160498	0.190307	0.279225
DGASCAELVSFK	PCI domain-containing protein 2	Q5JVF3	PCID2		2.48562	2.48562
DGFYEAELCPDR	Transcription factor p65	Q04206	RELA	2.95067		2.95067
DGGVQACFSR	Guanine nucleotide-binding protein G(i) subunit alpha	P08754	GNAI3	0.0632463	0.743807	0.403527	0.350667
DGMMQKPGSNAPVGGNVTSNFSGDDLECR	Cancer/testis antigen family 45 member A10	P0DMU9	CT45A10	3.36881		3.36881
DGQPYCEKDYHNLFSPR	Paxillin	P49023	PXN		-3.08009	-3.08009
DGTAGSHFMASPQCVGYSR	GDP-fucose protein O-fucosyltransferase 1	Q9H488	POFUT1	1.3586		1.3586
DHHTADLCR	Protein-glutamine gamma-glutamyltransferase 2	P21980	TGM2	-1.26512	0.194474	-0.535324	0.223952
DHRPPCAQEAPR	Sequestosome-1	Q13501	SQSTM1	0.357552	0.431733	0.394643	1.22433
DIKWDFTPCK	V-type proton ATPase catalytic subunit A	P38606	ATP6V1A	1.75331	2.73622	2.24477	0.862607
DIRPVCR	ATP-dependent RNA helicase DDX39A	O00148	DDX39A	0.472638		0.472638
DKEEEEEVAGGDCIGSTVYSK	Protein SAAL1	Q96ER3	SAAL1		-0.287486	-0.287486
DKLDPDMALCR	Procollagen-lysine,2-oxoglutarate 5-dioxygenase 2	O00469	PLOD2	4.70253	3.29959	4.00106	0.956678
DKLPQPVQPDPVSHCK	Integrin beta-1	P05556	ITGB1	2.02342		2.02342
DKMCSMVK	40S ribosomal protein S3a	P61247	RPS3A	0.333991	0.54813	0.44106	0.819273
DKMCSMVKK	40S ribosomal protein S3a	P61247	RPS3A		0.49803	0.49803
DLAGCIHGLSNVK	Isocitrate dehydrogenase [NADP], mitochondrial	P48735	IDH2	-0.504999	0.770032	0.132517	0.0607167
DLATVAFCDAQSTQEIHEK	C-terminal-binding protein 2	P56545	CTBP2	0.878552	0.635062	0.756807	0.993358
DLDQCRDGK	Protein S100-A10	P60903	S100A10	0.124313		0.124313
DLKPSNLLINTTCDLK	Mitogen-activated protein kinase 3	P27361	MAPK3		0.851501	0.851501
DLLPAAQYCCR	Fibronectin type III domain-containing protein 3B	Q53EP0	FNDC3B		-0.376865	-0.376865
DLMACAQTGSGK	ATP-dependent RNA helicase DDX3X	O00571	DDX3X	1.52771		1.52771
DLQPFPTCQALVYR	Ribosome biogenesis protein BOP1	Q14137	BOP1		-0.0707172	-0.0707172
DLSHIGDAVVISCAK	Proliferating cell nuclear antigen	P12004	PCNA	-0.730102	-0.902425	-0.816263	1.17424
DLSYCLSGMYDHR	Heterogeneous nuclear ribonucleoprotein F	P52597	HNRNPF	0.523451	0.400525	0.461988	1.07468
DLTTAGAVTQCYR	60S ribosomal protein L18a	Q02543	RPL18A	0.205005	-0.173189	0.0159079	0.0238473
DNQNFCVPCYEK	Four and a half LIM domains protein 2	Q14192	FHL2	-0.502671	-0.384977	-0.443824	1.07613
DNTNEIYSGKFCECDNFNCDR	Integrin beta-1	P05556	ITGB1	-0.440186	1.06446	0.312138	0.125154
DNWVFCGGK	Protein FAM3C	Q92520	FAM3C		2.44586	2.44586
DQDGCLPEEVTGCK	Acyl-CoA-binding domain-containing protein 6	Q9BR61	ACBD6	0.840961		0.840961
DRVLAELPQCLRK	Ras-related protein Rab-34	Q9BZG1	RAB34	0.673023	0.758006	0.715515	1.42295
DSDDVPMVLVGNKCDLPTR	GTPase NRas	P01111	NRAS		1.69131	1.69131
DSGGREDLVYNIICK	Ephrin type-B receptor 2	P29323	EPHB2	1.60251	1.10942	1.35597	0.941188
DSLYVDGDCTMDIR	Profilin-2	P35080	PFN2	0.0930647	-0.122135	-0.0145353	0.0388075
DSNNLCLHFNPR	Galectin-1	P09382	LGALS1	-0.429851	-0.416944	-0.423397	2.01312
DSPQSLTDESCSEK	Melanophilin	Q9BV36	MLPH	0.516265		0.516265
DSSTCPGDYVLSVSENSR	Crk-like protein	P46109	CRKL	-2.65874	-3.40213	-3.03044	1.1096
DTCYSPKPSVYLSTPSSASK	CD2-associated protein	Q9Y5K6	CD2AP		2.42206	2.42206
DVQIGDIVTVGECRPLSK	40S ribosomal protein S11	P62280	RPS11	0.273613	0.414951	0.344282	0.889798
DVTLQKQCVPFR	60S ribosomal protein L17	P18621	RPL17	0.39365	1.09057	0.742111	0.55366
DWDSPYSHDLDTSADSVGNACR	5'-3' exonuclease PLD3	Q8IV08	PLD3		2.24209	2.24209
DWSDEPIKECGTNECLDNNGGCSHVCNDLK	Low-density lipoprotein receptor	P01130	LDLR	-0.761315		-0.761315
DYEEIGPSICR	Actin-related protein 3	P61158	ACTR3		0.202328	0.202328
EACWTISNITAGNR	Importin subunit alpha-7	O60684	KPNA6	0.566713	-1.83168	-0.632486	0.16051
EADTDVQVCPNYSIPQKTDSYFNPK	TRMT1-like protein	Q7Z2T5	TRMT1L		1.83808	1.83808
EAELSKGESVCLDR	Mitochondrial import inner membrane translocase subunit Tim10	P62072	TIMM10	-0.338324	2.59655	1.12911	0.234715
EAEPHPLWEYPCR	Protein arginine N-methyltransferase 7	Q9NVM4	PRMT7	-0.956074		-0.956074
EAIEGTYIDKKCPFTGNVSIR	40S ribosomal protein S11	P62280	RPS11	0.403193	0.411897	0.407545	2.16762
EAPDGCPDHVLR	Neurochondrin	Q9UBB6	NCDN	-0.961321		-0.961321
EASSSACDLPR	2-aminoethanethiol dioxygenase	Q96SZ5	ADO		2.57037	2.57037
ECADLWPR	60S ribosomal protein L23	P62829	RPL23	0.245633	0.296974	0.271304	1.22144
ECFVCTACR	Four and a half LIM domains protein 2	Q14192	FHL2	-0.458531	-0.513956	-0.486243	1.44077
ECFVCTACRK	Four and a half LIM domains protein 2	Q14192	FHL2	0.246685		0.246685
ECGNAHYQR	Peptidyl-prolyl cis-trans isomerase FKBP8	Q14318	FKBP8	-0.768486	-0.491889	-0.630188	0.861602
ECPSDECGAGVFMASHFDR	Ubiquitin-40S ribosomal protein S27a	P62979	RPS27A	0.759958	0.203657	0.481808	0.477149
ECQEESFWK	OCIA domain-containing protein 2	Q56VL3	OCIAD2	1.0914	-0.281555	0.404923	0.179977
ECREPELGLEELLR	Hsp70-binding protein 1	Q9NZL4	HSPBP1		1.29026	1.29026
EDQLLCTDCYSNEYSSK	Four and a half LIM domains protein 2	Q14192	FHL2	-0.575264		-0.575264
EECPVFTPPGGETLDQVK	Fructose-2,6-bisphosphatase TIGAR	Q9NQ88	TIGAR	1.88795		1.88795
EEEIAALVIDNGSGMCK	Actin, cytoplasmic 2	P63261	ACTG1	0.825084		0.825084
EETQEDKDCPIKEEK	Tyrosine-protein phosphatase non-receptor type 1	P18031	PTPN1		0.607878	0.607878
EFMLCR	NADH dehydrogenase [ubiquinone] 1 alpha subcomplex subunit 8	P51970	NDUFA8	0.329418		0.329418
EGAKLECGGSAMEDK	Aldehyde dehydrogenase family 1 member A3	P47895	ALDH1A3	-0.19188	1.83681	0.822465	0.246981
EGELSTCGCSR	Protein Wnt-5a	P41221	WNT5A		3.34777	3.34777
EGGVIVDYHGCDFFPER	Adenylate kinase isoenzyme 6	Q9Y3D8	AK6	-0.0490911	-0.115285	-0.0821879	0.613115
EGICALGGTSELSSEGTQHSYSEEEK	Plastin-3	P13797	PLS3	-1.87397	0.02775	-0.923111	0.292919
EGICGSCAMNINGGNTLACTR	Succinate dehydrogenase [ubiquinone] iron-sulfur subunit, mitochondrial	P21912	SDHB	0.890337	1.41175	1.15104	0.848326
EGPNKTGTSCALDCGAGIGR	N-terminal Xaa-Pro-Lys N-methyltransferase 1	Q9BV86	NTMT1	1.29153		1.29153
EGPYGLIICPSR	Probable ATP-dependent RNA helicase DDX41	Q9UJV9	DDX41		-1.81747	-1.81747
EGQECGVYTPNCAPGLQCHPPKDDEAPLR	Insulin-like growth factor-binding protein 6	P24592	IGFBP6	-1.1177	-0.543385	-0.830543	0.673831
EGQNYQQNCIKEVEQFTQVAK	NADH dehydrogenase [ubiquinone] 1 beta subcomplex subunit 10	O96000	NDUFB10	0.868856	0.377882	0.623369	0.621907
EGVECEVINMR	Pyruvate dehydrogenase E1 component subunit beta, mitochondrial	P11177	PDHB		-1.0874	-1.0874
EHGLNPDVVQNIQDICNSK	Zinc finger CCCH-type antiviral protein 1	Q7Z2W4	ZC3HAV1	0.755741	-0.492994	0.131373	0.0614931
EHGQCADVDECSLAEK	Protein disulfide isomerase CRELD2	Q6UXH1	CRELD2	1.82087	1.08009	1.45048	0.798153
EHGVGGVSQCPEPGLR	182 kDa tankyrase-1-binding protein	Q9C0C2	TNKS1BP1	1.29533	1.51095	1.40314	1.3114
EHQLASASELPLGSRPAPQPPVPRPEHCEGAAAGLK	Protein ZNRD2	O60232	ZNRD2		0.612855	0.612855
EICNAYTELNDPMR	Lysine--tRNA ligase	Q15046	KARS1	-0.0205047	0.23109	0.105293	0.25466
EIDSVKYLECSALTQR	Ras-related C3 botulinum toxin substrate 2	P15153	RAC2	1.03643	-0.878098	0.0791672	0.0234344
EILKWEALHAAECPCGPSLIR	Cytochrome c-type heme lyase	P53701	HCCS		0.885159	0.885159
EIRDQGSCGSCWAFGAVEAISDR	Cathepsin B	P07858	CTSB		0.150416	0.150416
EIVHIQAGQCGNQIGTK	Tubulin beta-6 chain	Q9BUF5	TUBB6	0.0824844	0.257285	0.169885	0.519284
EIVHLQAGQCGNQIGAK	Tubulin beta-4B chain	P68371	TUBB4B	0.420705	0.353126	0.386915	1.25605
EIYTHFTCATDTK	Guanine nucleotide-binding protein G(i) subunit alpha-2	P04899	GNAI2	0.0160106	1.13696	0.576485	0.308887
EKECGVTATFDASR	Protein numb homolog	P49757	NUMB		-0.384825	-0.384825
EKLCFLDKVEPHATIAEIK	Very-long-chain enoyl-CoA reductase	Q9NZ01	TECR	0.298024	1.121	0.709511	0.475503
EKPFSNSKVECQAQAR	Nuclear autoantigen Sp-100	P23497	SP100	2.05588	0.521519	1.2887	0.466172
EKPSQGIYMVYCR	PHD finger protein 6	Q8IWS0	PHF6	-0.12201		-0.12201
ELAGHTGYLSCCR	Guanine nucleotide-binding protein G(I)/G(S)/G(T) subunit beta-1	P62873	GNB1		0.296685	0.296685
ELANSPDCPQMCAYK	Phosphatidylinositol transfer protein beta isoform	P48739	PITPNB	0.688965	0.515161	0.602063	1.03972
ELAQQVQQVAAEYCR	Probable ATP-dependent RNA helicase DDX5	P17844	DDX5	-0.798223		-0.798223
ELCAQPGQVVAPGAVLVR	RNA polymerase II subunit A C-terminal domain phosphatase	Q9Y5B0	CTDP1	0.257445		0.257445
ELDQWVEQLNECK	Serine/threonine-protein phosphatase 2A catalytic subunit beta isoform	P62714	PPP2CB		-1.62251	-1.62251
ELEASEELDTICPK	Glutaredoxin-3	O76003	GLRX3	0.457173	-0.144521	0.156326	0.158066
ELGGCSQAGNR	Arf-GAP domain and FG repeat-containing protein 2	O95081	AGFG2		1.95663	1.95663
ELLELSCCHSCPFSSTAAAK	MMS19 nucleotide excision repair protein homolog	Q96T76	MMS19		0.0626309	0.0626309
ELLSDTAHLNETHCAR	Melanophilin	Q9BV36	MLPH	0.902587	-0.198535	0.352026	0.19529
ELPGHTGYLSCCR	Guanine nucleotide-binding protein G(I)/G(S)/G(T) subunit beta-2	P62879	GNB2	0.626921	0.308327	0.467624	0.679818
EMACPYSVLISGDIKDR	Protein FAM98B	Q52LJ0	FAM98B	2.13932		2.13932
EMENFEAPFHCLAK	Intraflagellar transport protein 27 homolog	Q9BW83	IFT27	1.37012	0.178366	0.774244	0.379253
EMNPALGIDCLHK	T-complex protein 1 subunit epsilon	P48643	CCT5	0.536361	1.27335	0.904853	0.60871
EMPCPLPCDEESPEAELHNHGIQINSCSVR	Nuclear autoantigen Sp-100	P23497	SP100		2.40066	2.40066
ENPVINDCCR	TRPM8 channel-associated factor 1	Q9Y4C2	TCAF1	-0.731106		-0.731106
ENVNATENCISAVGK	Importin-5	O00410	IPO5	0.190472		0.190472
EPGLCTWQSLR	Metalloproteinase inhibitor 1	P01033	TIMP1	0.858661	0.554526	0.706594	0.869827
EPSVPASCAVSATYER	La-related protein 4B	Q92615	LARP4B		1.6638	1.6638
EQCCYNCGKPGHLAR	Cellular nucleic acid-binding protein	P62633	CNBP	-1.35375	0.145461	-0.604143	0.245542
EQCEQLEK	Cytochrome b-c1 complex subunit 6, mitochondrial	P07919	UQCRH	0.375433	0.358745	0.367089	1.83958
EQCGCR	UDP-glucose 4-epimerase	Q14376	GALE	0.195562		0.195562
EQFCDHPLEHCEDTR	Ankyrin repeat and SOCS box protein 1	Q9Y576	ASB1	2.78798	-0.939053	0.924462	0.150685
EQICEVEEGDKPDVDK	Aldehyde dehydrogenase family 1 member A3	P47895	ALDH1A3	1.0192	1.36298	1.19109	1.03979
EQPWHKECFVCTACR	Four and a half LIM domains protein 2	Q14192	FHL2		0.382106	0.382106
EQVPSLGSNVACGLAYTDYHK	Acetolactate synthase-like protein	A1L0T0	ILVBL	1.68914	2.10812	1.89863	1.15515
EQWPQCPTIK	Cathepsin B	P07858	CTSB	-0.0586611	0.547756	0.244547	0.245714
ERICSEEER	MIC	Q9NX63	CHCHD3		1.43637	1.43637
ERLELCDER	Cytochrome b-c1 complex subunit 6, mitochondrial	P07919	UQCRH	0.130666	2.39998	1.26532	0.332198
ERPTPSLNNNCTTSEDSLVLYNR	Bifunctional glutamate/proline--tRNA ligase	P07814	EPRS1	1.794	-0.646148	0.573928	0.142617
ESAQCVGDEFLNCK	Sorting nexin-8	Q9Y5X2	SNX8	0.22008	2.22433	1.22221	0.359304
ESGSLSPEHGPVVVHCSAGIGR	Tyrosine-protein phosphatase non-receptor type 1	P18031	PTPN1	-0.719463	0.744733	0.0126353	0.00479771
ESTGNMVTGQTVCK	Condensin complex subunit 1	Q15021	NCAPD2	0.21299	1.02949	0.621242	0.431654
ETDCGVHINAGPEIGVASTK	Glutamine--fructose-6-phosphate aminotransferase [isomerizing] 2	O94808	GFPT2	1.42689	1.05884	1.24287	1.02881
EVAESCKDIK	Isocitrate dehydrogenase [NAD] subunit alpha, mitochondrial	P50213	IDH3A	0.680756		0.680756
EVESLPAVCPSDGCTWK	TNF receptor-associated factor 2	Q12933	TRAF2		-0.995145	-0.995145
EVEVIGGADKYHSVCR	Thymidine kinase, cytosolic	P04183	TK1	-0.401112	0.569516	0.0842019	0.0503001
EVIAVSCGPAQCQETIR	Electron transfer flavoprotein subunit beta	P38117	ETFB		0.16716	0.16716
EVKPEETTCSEHCLQK	Mitochondrial import inner membrane translocase subunit Tim9	Q9Y5J7	TIMM9	0.378953	0.441157	0.410055	1.317
EVNVSPCPTQPCQLSK	NPC intracellular cholesterol transporter 2	P61916	NPC2	-0.424138	0.275574	-0.0742819	0.0620761
EVQCPEANIDTALCK	Protein AHNAK2	Q8IVF2	AHNAK2	-1.68109		-1.68109
EVSLGCMLNGQEVR	Beta-2-syntrophin	Q13425	SNTB2		0.896805	0.896805
EVVESCR	UDP-glucose 6-dehydrogenase	O60701	UGDH	0.271147		0.271147
EWNLPPNAPACMER	Methylosome protein 50	Q9BQA1	WDR77		0.237557	0.237557
FAAAYCR	Pyruvate dehydrogenase E1 component subunit alpha, somatic form, mitochondrial	P08559	PDHA1	1.08633	1.40299	1.24466	1.09394
FACFER	Phosphate carrier protein, mitochondrial	Q00325	SLC25A3	0.577804	0.390725	0.484264	0.915522
FACHSASLTVR	Non-POU domain-containing octamer-binding protein	Q15233	NONO		0.0444617	0.0444617
FATCNPSTR	Aldehyde dehydrogenase family 1 member A3	P47895	ALDH1A3	-0.0343856	0.684455	0.325035	0.274125
FCECDNFNCDR	Integrin beta-1	P05556	ITGB1	-0.097053	2.08695	0.99495	0.276065
FCEMCCDCR	Serine/threonine-protein phosphatase 4 regulatory subunit 1	Q8TF05	PPP4R1		-1.35312	-1.35312
FCFWPDSPSPDR	Nuclear-interacting partner of ALK	Q86WB0	ZC3HC1		-0.919449	-0.919449
FCIWTESAFR	60S ribosomal protein L4	P36578	RPL4		3.75489	3.75489
FCPFAER	Glutathione S-transferase omega-1	P78417	GSTO1	-1.07529	-1.08117	-1.07823	2.76075
FCSFSPCIEQVQR	tRNA (adenine(58)-N(1))-methyltransferase catalytic subunit TRMT61A	Q96FX7	TRMT61A	1.54048	2.36719	1.95383	0.877039
FCVSCAR	DNA (cytosine-5)-methyltransferase 1	P26358	DNMT1		-0.0916132	-0.0916132
FCYGQCNSFYIPR	Gremlin-1	O60565	GREM1	0.461385	0.0681518	0.264768	0.390791
FDCHHCNESLFGK	Four and a half LIM domains protein 2	Q14192	FHL2	-0.380827	-0.412488	-0.396658	1.59528
FDCHHCNESLFGKK	Four and a half LIM domains protein 2	Q14192	FHL2	-0.141496	-0.284671	-0.213083	0.685422
FDNLYCCR	S-adenosylhomocysteine hydrolase-like protein 1	O43865	AHCYL1		0.387169	0.387169
FDTGNLCMVTGGANLGR	40S ribosomal protein S4, X isoform	P62701	RPS4X	-0.271028	-0.27507	-0.273049	2.32677
FEHCNFNDVTTR	CD59 glycoprotein	P13987	CD59		1.47851	1.47851
FELSCYSLAPQIK	Argininosuccinate synthase	P00966	ASS1		1.81031	1.81031
FENLCK	Heat shock protein HSP 90-beta	P08238	HSP90AB1		3.08921	3.08921
FFAPWCGHCK	Thioredoxin domain-containing protein 5	Q8NBS9	TXNDC5	-0.37778	-0.255768	-0.316774	0.916782
FFGYCNDVDR	COX assembly mitochondrial protein 2 homolog	Q9NRP2	CMC2	0.235678	0.482205	0.358942	0.676567
FFSGGCHR	Tissue factor pathway inhibitor 2	P48307	TFPI2	0.396499	0.493833	0.445166	1.15913
FGDYQCNSAMGISQMLK	Arginine--tRNA ligase, cytoplasmic	P54136	RARS1		1.11397	1.11397
FGEMERDCQIAHGAAQFLR	DNA-directed RNA polymerase II subunit RPB2	P30876	POLR2B	1.47837	1.1607	1.31953	1.11768
FGYVQHYGLGSACDNVER	Mitochondrial ribosome-associated GTPase 1	Q9BT17	MTG1	0.785192		0.785192
FICEQDHQNFLR	Heat shock protein 105 kDa	Q92598	HSPH1	0.0250253	-1.80744	-0.891208	0.293441
FICTTSAIQNR	ATP-citrate synthase	P53396	ACLY	0.314554	0.634922	0.474738	0.683676
FIDPFCK	Ribosomal RNA processing protein 1 homolog B	Q14684	RRP1B	0.249443		0.249443
FITVCDYTNPCTK	Myeloid differentiation primary response protein MyD88	Q99836	MYD88	3.49571		3.49571
FKCIASTYYR	Ras-related protein Rab-34	Q9BZG1	RAB34	0.368304	0.725625	0.546965	0.696825
FLHKHDLDLICR	Serine/threonine-protein phosphatase PP1-alpha catalytic subunit	P62136	PPP1CA		3.21278	3.21278
FLNIQCQLSR	3'-5' exoribonuclease 1	Q8IV48	ERI1	0.36192		0.36192
FLNRHDLDLICR	Serine/threonine-protein phosphatase PP1-beta catalytic subunit	P62140	PPP1CB		0.501025	0.501025
FLTFKDCDPGEVNK	39S ribosomal protein L39, mitochondrial	Q9NYK5	MRPL39	-0.783881		-0.783881
FMADCPHTIGVEFGTR	Ras-related protein Rab-14	P61106	RAB14	0.142837	-0.126544	0.00814627	0.0170312
FNAHGDANTIVCNSK	Galectin-1	P09382	LGALS1	-0.562179	-0.610072	-0.586126	1.58512
FNAHGDANTIVCNSKDGGAWGTEQR	Galectin-1	P09382	LGALS1	-0.415979	-0.218388	-0.317183	0.71618
FNQSQLEAEENEQITIADNHYCSSGQGQGR	TBC1 domain family member 5	Q92609	TBC1D5	0.440108	1.99913	1.21962	0.441233
FPDEATCMGFCAPK	Tissue factor pathway inhibitor 2	P48307	TFPI2	0.564613	0.665449	0.615031	1.2834
FQAATMCK	DCN1-like protein 3	Q8IWE4	DCUN1D3	1.17015		1.17015
FQGIKHECQANGPEDLNR	Destrin	P60981	DSTN	-0.359288	-0.498183	-0.428735	0.990408
FQGQTCEMCQTCLGVCAEHK	Integrin beta-1	P05556	ITGB1	1.05514	-0.097461	0.47884	0.252871
FQMTQEVVCDECPNVK	DnaJ homolog subfamily B member 11	Q9UBS4	DNAJB11	0.262817		0.262817
FRLDCPLAMER	Vacuolar protein sorting-associated protein 28 homolog	Q9UK41	VPS28	0.368394	-0.707628	-0.169617	0.0938945
FSAIQCAAAVPR	DNA polymerase delta subunit 3	Q15054	POLD3		-0.476925	-0.476925
FSALLSDCVR	Protein Niban 1	Q9BZQ8	NIBAN1	-1.11165		-1.11165
FSAVALCK	Ubiquitin carboxyl-terminal hydrolase isozyme L1	P09936	UCHL1		-0.825328	-0.825328
FSCLLPDPR	Golgi-specific brefeldin A-resistance guanine nucleotide exchange factor 1	Q92538	GBF1		0.277312	0.277312
FSCPETDSHR	Carnitine O-palmitoyltransferase 1, liver isoform	P50416	CPT1A	0.594352	-0.17916	0.207596	0.163432
FSEYLLECPSAEVR	Probable ubiquitin carboxyl-terminal hydrolase FAF-Y	O00507	USP9Y		0.721789	0.721789
FSFCCSPEPEAEAEAAAGPGPCER	Sequestosome-1	Q13501	SQSTM1	0.155129	-0.235327	-0.0400989	0.0599643
FSFQCPGR	Integrin-linked protein kinase	Q13418	ILK	0.526645	0.895942	0.711293	0.791304
FSIQTMCPIEGEGNIAR	Aminoacyl tRNA synthase complex-interacting multifunctional protein 2	Q13155	AIMP2		0.158924	0.158924
FSPNSSNPIIVSCGWDK	Receptor of activated protein C kinase 1	P63244	RACK1	0.0291763	0.126512	0.077844	0.448911
FSPNSSNPIIVSCGWDKLVK	Receptor of activated protein C kinase 1	P63244	RACK1		0.122912	0.122912
FSSACDVGGCTGALAR	Probable bifunctional dTTP/UTP pyrophosphatase/methyltransferase protein	O95671	ASMTL		1.89842	1.89842
FTCACPDGMLLAR	Low-density lipoprotein receptor	P01130	LDLR	1.332		1.332
FTCEQALQHPWIAGDTALDK	Calcium/calmodulin-dependent protein kinase type 1	Q14012	CAMK1	1.0452	0.401925	0.723565	0.574644
FTHCEQVLGEGALDR	E3 ubiquitin-protein ligase TRIM47	Q96LD4	TRIM47	0.239242		0.239242
FVASCGFTPDVK	Transducin beta-like protein 2	Q9Y4P3	TBL2		-1.08142	-1.08142
FVLCPECENPETDLHVNPK	Eukaryotic translation initiation factor 5	P55010	EIF5		-1.12884	-1.12884
FVQALLAPCSLR	Lipase maturation factor 2	Q9BU23	LMF2		1.51965	1.51965
FVYTPAMESVCGYFHR	Metalloproteinase inhibitor 1	P01033	TIMP1		0.338617	0.338617
FYACSACR	rRNA N6-adenosine-methyltransferase ZCCHC4	Q9H5U6	ZCCHC4		-0.204569	-0.204569
FYAPWCGHCK	Thioredoxin domain-containing protein 5	Q8NBS9	TXNDC5	-0.0534684	-0.717467	-0.385468	0.344243
FYNAGLAYCHSK	Retinol dehydrogenase 11	Q8TC12	RDH11	0.503478	0.264879	0.384179	0.717424
GACYGADHDLGR	All-trans-retinol 13,14-reductase	Q6NUM9	RETSAT	2.49307		2.49307
GADMNGLPTKGPTEICDK	UPF0729 protein C18orf32	Q8TCD1	C18orf32		0.925659	0.925659
GAGFGPQHNRHCLLTCEECK	OCIA domain-containing protein 2	Q56VL3	OCIAD2	1.00125		1.00125
GALYCELCYEK	PDZ and LIM domain protein 5	Q96HC4	PDLIM5	-1.11533	-2.90458	-2.00995	0.574144
GAPNNSCSEIK	Ubiquitin-protein ligase E3A	Q05086	UBE3A		1.1216	1.1216
GAQGISCGR	Enhancer of mRNA-decapping protein 3	Q96F86	EDC3	1.17375		1.17375
GASCQGCPNQR	Cytosolic Fe-S cluster assembly factor NUBP1	P53384	NUBP1		1.20662	1.20662
GASDKCSCCA	Metallothionein-2	P02795	MT2A	-0.26627	-0.53595	-0.40111	0.685175
GATCSACPNNDK	Glioma pathogenesis-related protein 1	P48060	GLIPR1	1.44997		1.44997
GCGTVLLSGPR	60S ribosomal protein L18	Q07020	RPL18	-0.0623697	-0.5088	-0.285585	0.374328
GCGVVKFESPEVAER	Heterogeneous nuclear ribonucleoprotein M	P52272	HNRNPM	1.09797		1.09797
GCHINECLSR	Prolow-density lipoprotein receptor-related protein 1	Q07954	LRP1		0.646063	0.646063
GCHLLVATPGR	ATP-dependent RNA helicase DDX3X	O00571	DDX3X	0.165197	-0.182734	-0.00876897	0.0141527
GCLELIKETGVPIAGR	C-1-tetrahydrofolate synthase, cytoplasmic	P11586	MTHFD1	0.0773715	-0.0411973	0.0180871	0.0907201
GCLTEQTYPEVVR	Serine/threonine-protein phosphatase 2A 56 kDa regulatory subunit epsilon isoform	Q16537	PPP2R5E	-2.72282		-2.72282
GCPVNTEPSGPTCEK	Cytochrome c-type heme lyase	P53701	HCCS	-0.636363	1.4225	0.393069	0.114754
GCPVNTEPSGPTCEKK	Cytochrome c-type heme lyase	P53701	HCCS		0.742895	0.742895
GCTATLGNFAK	40S ribosomal protein S2	P15880	RPS2	0.0966618	0.153937	0.1253	0.844525
GEDEDKGPPCGPVNCNEK	Proteasome activator complex subunit 1	Q06323	PSME1		0.341057	0.341057
GEGTEEAECKKDDALELQSHAK	A-kinase anchor protein 12	Q02952	AKAP12		1.39098	1.39098
GFIASQGMGNGCGR	TRIO and F-actin-binding protein	Q9H2D6	TRIOBP	-0.609028		-0.609028
GFLTERDDILCPDCGKDI	Four and a half LIM domains protein 2	Q14192	FHL2		-1.04695	-1.04695
GFPPEAINNFCAR	Glutamine--tRNA ligase	P47897	QARS1		1.51755	1.51755
GGDCLTSQTR	DnaJ homolog subfamily C member 10	Q8IXB1	DNAJC10		-2.77204	-2.77204
GGDEYDNHCGK	Cation-dependent mannose-6-phosphate receptor	P20645	M6PR	1.35047		1.35047
GGDISVCEWYQR	Cytochrome c oxidase subunit 6B1	P14854	COX6B1	0.973058	0.640192	0.806625	0.887605
GGDPHSCKAVTDEEPFLIFANR	Prolow-density lipoprotein receptor-related protein 1	Q07954	LRP1	1.78843		1.78843
GGFCNFMHLKPISR	Splicing factor U2AF 35 kDa subunit-like protein	P0DN76	U2AF1L5	0.364959	0.747957	0.556458	0.675709
GHSCYRPR	40S ribosomal protein S6	P62753	RPS6		-0.290044	-0.290044
GHVLGNGSQVTQAANSGCSK	Leucine zipper protein 1	Q86V48	LUZP1	1.93411	2.53874	2.23642	1.06784
GICECGVCK	Integrin beta-1	P05556	ITGB1	-0.0765603	0.344219	0.133829	0.194277
GIGDCVR	Tricarboxylate transport protein, mitochondrial	P53007	SLC25A1		0.236694	0.236694
GIQVSNNGPCLGSR	Long-chain-fatty-acid--CoA ligase 1	P33121	ACSL1	2.52736	1.06807	1.79771	0.610027
GISCMNTTLSESPFK	Inorganic pyrophosphatase	Q15181	PPA1	-0.639383	-0.631825	-0.635604	2.42192
GISCMNTTLSESPFKCDPDAAR	Inorganic pyrophosphatase	Q15181	PPA1	-0.559732	-0.55178	-0.555756	2.34158
GLCAIAQAESLR	40S ribosomal protein S3	P23396	RPS3	0.723145	0.623398	0.673271	1.32724
GLECSPSTPTMNSYFYK	Protein VAC14 homolog	Q08AM6	VAC14		1.28693	1.28693
GLESTTLADKDGEIYCK	Cysteine and glycine-rich protein 1	P21291	CSRP1	0.372757	0.270883	0.32182	1.00029
GLESTTLADKDGEIYCKGCYAK	Cysteine and glycine-rich protein 1	P21291	CSRP1	-0.87959		-0.87959
GLFSANDWQCK	Zinc finger Ran-binding domain-containing protein 2	O95218	ZRANB2		0.379767	0.379767
GLGDCLVK	ADP/ATP translocase 2	P05141	SLC25A5		0.528928	0.528928
GLPWSCSADEVMR	Heterogeneous nuclear ribonucleoprotein H2	P55795	HNRNPH2	-0.797228		-0.797228
GLPWSCSADEVQR	Heterogeneous nuclear ribonucleoprotein H	P31943	HNRNPH1	-1.68396		-1.68396
GLSSLLCNFTK	DNA-dependent protein kinase catalytic subunit	P78527	PRKDC		0.747085	0.747085
GLVVLGFPCNQFGHQENAK	Glutathione peroxidase 1	P07203	GPX1		-0.0562342	-0.0562342
GLYDGPVCEVSVTPK	Dihydropyrimidinase-related protein 2	Q16555	DPYSL2	0.133807	-0.330016	-0.0981042	0.127711
GMDQGLLGMCPGER	Peptidyl-prolyl cis-trans isomerase FKBP10	Q96AY3	FKBP10	1.40833		1.40833
GMHICEDAVKR	Protein numb homolog	P49757	NUMB		-0.966314	-0.966314
GMPETTQPDKQCGQVAAAAAAQPPASHGPER	BAG family molecular chaperone regulator 3	O95817	BAG3		-3.35175	-3.35175
GNHECASINR	Serine/threonine-protein phosphatase PP1-alpha catalytic subunit	P62136	PPP1CA	0.27415	0.47371	0.37393	0.77987
GNYSTDQLCVLDNVK	HEAT repeat-containing protein 3	Q7Z4Q2	HEATR3	0.082759		0.082759
GPASCSSLSK	Rho guanine nucleotide exchange factor 6	Q15052	ARHGEF6		0.867921	0.867921
GPAVPPELDKHFLLCEACGK	Protein sprouty homolog 4	Q9C004	SPRY4		-1.35714	-1.35714
GPCIIYNEDNGIIK	60S ribosomal protein L4	P36578	RPL4	0.210542	0.162521	0.186531	1.08885
GPFVEAEVPDVDLECPDAK	Neuroblast differentiation-associated protein AHNAK	Q09666	AHNAK		1.23524	1.23524
GPQLFHMDPSGTFVQCDAR	Proteasome subunit alpha type-5	P28066	PSMA5		0.157593	0.157593
GPSGCVESLEVTCR	Glutamine--tRNA ligase	P47897	QARS1	1.91933	-0.366328	0.776501	0.207564
GQDHCGIESEVVAGIPR	Cathepsin B	P07858	CTSB	0.378677	0.455128	0.416903	1.23501
GQEFLRPCGSTEVD	Prolyl 4-hydroxylase subunit alpha-2	O15460	P4HA2		-1.24299	-1.24299
GQKCEFQDAYVLLSEK	60 kDa heat shock protein, mitochondrial	P10809	HSPD1	-0.0391865	0.56908	0.264947	0.264586
GQKCEFQDAYVLLSEKK	60 kDa heat shock protein, mitochondrial	P10809	HSPD1		1.42989	1.42989
GQLCELSCSTDYR	Protein arginine N-methyltransferase 1	Q99873	PRMT1	0.251321		0.251321
GQVCLPVISAENWKPATK	Ubiquitin-conjugating enzyme E2 L3	P68036	UBE2L3	0.451202	0.965392	0.708297	0.654307
GQVLSTINTNQMNNTHAAVSPCGR	Transducin beta-like protein 2	Q9Y4P3	TBL2	-0.346265	-0.230644	-0.288455	0.899906
GRPGLCTPQCASLEPGPPAPSR	Peroxisomal leader peptide-processing protease	Q2T9J0	TYSND1		2.56347	2.56347
GSAFAIGSDGLCCQSR	ATP-dependent RNA helicase DDX1	Q92499	DDX1		-0.905513	-0.905513
GSAITGPVAKECADLWPR	60S ribosomal protein L23	P62829	RPL23	1.21935	2.27253	1.74594	0.729354
GSCIANAEEVDVPIK	Ephrin type-B receptor 2	P29323	EPHB2		1.59483	1.59483
GSCSTEVEKETQEK	V-type proton ATPase subunit G 1	O75348	ATP6V1G1		0.769735	0.769735
GSPGCVMDAVLR	Ankyrin repeat and SOCS box protein 1	Q9Y576	ASB1	3.08677	-0.258707	1.41403	0.257093
GSSGPQPAKPCSGATPTPLLLVGDR	MICAL-like protein 1	Q8N3F8	MICALL1	1.80848	2.00499	1.90674	1.48444
GSSPQNTTTPKPSVEGQQPAAAAACEPVDHAQSESILK	Inverted formin-2	Q27J81	INF2		0.130296	0.130296
GSSWHETCFICHR	Four and a half LIM domains protein 2	Q14192	FHL2		-0.335546	-0.335546
GSSWSADLDKCMDCASCR	Tumor necrosis factor receptor superfamily member 12A	Q9NP84	TNFRSF12A		1.58488	1.58488
GTEAGQVGEPGIPTGEAGPSCSSASDKLPR	Protein phosphatase 1G	O15355	PPM1G		1.38596	1.38596
GTFLCDECCSVHR	ARF GTPase-activating protein GIT2	Q14161	GIT2	0.33123		0.33123
GTRPAPGGCIQPR	Calcium/calmodulin-dependent protein kinase kinase 2	Q96RR4	CAMKK2	1.23082		1.23082
GVCSCVEAGK	DNA (cytosine-5)-methyltransferase 1	P26358	DNMT1	-0.188276	-0.583724	-0.386	0.520901
GVNEDTYSGILDCAR	Mitochondrial glutamate carrier 1	Q9H936	SLC25A22	1.23967	0.154883	0.697276	0.37585
GVNEDTYSGILDCARK	Mitochondrial glutamate carrier 1	Q9H936	SLC25A22	0.658967		0.658967
GVTECYECHPKPTQR	SUMO-activating enzyme subunit 2	Q9UBT2	UBA2	0.881238	-0.0386712	0.421283	0.277433
GVTIIGPATVGGIKPGCFK	ATP-citrate synthase	P53396	ACLY	0.550043	0.145141	0.347592	0.473975
GVVLCTFTR	28S ribosomal protein S12, mitochondrial	O15235	MRPS12		-0.200463	-0.200463
GYDSAGVGFDGGNDKDWEANACK	Glutamine--fructose-6-phosphate aminotransferase [isomerizing] 1	Q06210	GFPT1	1.1364	0.214077	0.675238	0.418549
GYHYATCLEGALK	Glutamine--fructose-6-phosphate aminotransferase [isomerizing] 1	Q06210	GFPT1	1.79998	-1.6804	0.0597886	0.00960079
GYIGTHCGQPVCESGCLNGGR	Fibrillin-1	P35555	FBN1	-0.411609	-0.216688	-0.314149	0.717809
GYNYATCLEGALK	Glutamine--fructose-6-phosphate aminotransferase [isomerizing] 2	O94808	GFPT2	0.0825266	0.453768	0.268147	0.414009
GYVSCALGCPYEGK	Hydroxymethylglutaryl-CoA lyase, mitochondrial	P35914	HMGCL	0.366256	0.518679	0.442468	0.964219
HAACPVLVGCK	Prolyl 4-hydroxylase subunit alpha-2	O15460	P4HA2	-0.462814	0.934117	0.235651	0.10081
HAACPVLVGNK	Prolyl 4-hydroxylase subunit alpha-1	P13674	P4HA1	0.00659403		0.00659403
HCDEVGFNAEEAHNIVK	Dynein light chain Tctex-type 3	P51808	DYNLT3		0.0958134	0.0958134
HCDSINSDFGSESGGCGDSSPGPSASQGPR	Serine/threonine-protein kinase Nek9	Q8TD19	NEK9		3.344	3.344
HCECSTDEVNSEDMDAYCR	Integrin beta-1	P05556	ITGB1	1.04688	0.822609	0.934742	1.11915
HCLLTCEECK	OCIA domain-containing protein 2	Q56VL3	OCIAD2	0.398137	0.477123	0.43763	1.24188
HCSQVDSVR	Src substrate cortactin	Q14247	CTTN	1.8966	2.22323	2.05991	1.29786
HDLDLICR	Serine/threonine-protein phosphatase PP1-alpha catalytic subunit	P62136	PPP1CA	0.2571		0.2571
HEASDFPCR	Tyrosine-protein phosphatase non-receptor type 1	P18031	PTPN1	-0.513526	1.2835	0.384986	0.129425
HECQANGPEDLNRACIAEK	Destrin	P60981	DSTN	0.448164	0.11084	0.279502	0.461365
HELQANCYEEVK	Cofilin-1	P23528	CFL1		-0.102675	-0.102675
HELQANCYEEVKDR	Cofilin-1	P23528	CFL1	0.0519746	-0.0441077	0.00393346	0.0231955
HELQANCYEEVKDRCTLAEK	Cofilin-1	P23528	CFL1	-0.292251		-0.292251
HEQNIDCGGGYVK	Calreticulin	P27797	CALR	-0.0176868	-0.281668	-0.149678	0.337169
HFCPNVPIILVGNK	Transforming protein RhoA	P61586	RHOA	-0.0601656	0.218869	0.0793519	0.173417
HFCPNVPIILVGNKK	Transforming protein RhoA	P61586	RHOA	0.229896	-0.0799768	0.0749597	0.14683
HFLIECTPK	Tensin-3	Q68CZ2	TNS3	2.73235		2.73235
HFLSDTGMACR	5'-nucleotidase domain-containing protein 1	Q5TFE4	NT5DC1	0.813468	1.82496	1.31921	0.632534
HFPEAGIHYPDSTTGDGKPLATDYNGNCSLEK	NADH dehydrogenase [ubiquinone] 1 alpha subcomplex subunit 10, mitochondrial	O95299	NDUFA10	2.4822	1.48181	1.982	0.803061
HFVGMLPEKDCR	Destrin	P60981	DSTN	-0.558406	0.112936	-0.222735	0.202704
HGALAELCPPGGSHR	Melanophilin	Q9BV36	MLPH	-0.114167	0.370203	0.128018	0.160877
HGEVCPAGWKPGSDTIKPDVQK	Peroxiredoxin-1	Q06830	PRDX1	1.16071	0.755849	0.958277	0.877678
HGFCGIPITDTGR	Inosine-5'-monophosphate dehydrogenase 2	P12268	IMPDH2	0.341124	0.439033	0.390079	1.09974
HGGPQYCR	Prostaglandin E synthase	O14684	PTGES	0.153657	0.867679	0.510668	0.410701
HHCPSTPIILVGTK	Ras-related C3 botulinum toxin substrate 2	P15153	RAC2	0.587258	0.759717	0.673487	1.09115
HHPDLIFCR	PHD finger-like domain-containing protein 5A	Q7RTV0	PHF5A	1.75206	-0.334522	0.708768	0.207535
HIDCAHVYQNENEVGVAIQEK	Aldo-keto reductase family 1 member B1	P15121	AKR1B1	-1.15842		-1.15842
HIGDGCCLTR	Methyltransferase-like protein 7B	Q6UX53	METTL7B	0.402612	1.72714	1.06488	0.450749
HISPTAPDTLGCYPFYK	DNA polymerase delta subunit 2	P49005	POLD2	-0.510433		-0.510433
HIVPACFLAPLK	Exportin-T	O43592	XPOT	2.1579		2.1579
HLACLPR	Metalloproteinase inhibitor 1	P01033	TIMP1	0.487956		0.487956
HLECTK	Fragile X mental retardation syndrome-related protein 1	P51114	FXR1	0.315249		0.315249
HLHVLINNAGVMMCPYSK	Retinol dehydrogenase 11	Q8TC12	RDH11		1.56864	1.56864
HLNEIDLFHCIDPNDSK	Prostaglandin E synthase 3	Q15185	PTGES3	0.337752		0.337752
HLVCSSGGNAGIAAAYAAR	Serine dehydratase-like	Q96GA7	SDSL	0.37464	-0.445315	-0.0353376	0.0244476
HNYPDLVERDCNGDTPNLSFYR	Opioid growth factor receptor	Q9NZT2	OGFR		-2.90501	-2.90501
HPHDIIDDINSGAVECPAS	60S ribosomal protein L12	P30050	RPL12	-1.04781	-0.148961	-0.598387	0.387112
HQSLQCR	Urokinase plasminogen activator surface receptor	Q03405	PLAUR	-1.05756		-1.05756
HSCGDGFCSRPNMCTCPSGQIAPSCGSR	Fibrillin-1	P35555	FBN1		1.91717	1.91717
HSCIFPGQYNPSFISDESR	Protein HEG homolog 1	Q9ULI3	HEG1	1.90952		1.90952
HSMNPFCEIAVEEAVR	Electron transfer flavoprotein subunit beta	P38117	ETFB	0.367302	0.0876111	0.227456	0.454774
HTGCCGDNDPIDVCEIGSK	Inorganic pyrophosphatase	Q15181	PPA1	-0.763972	-0.454292	-0.609132	0.80005
HTGPGILSMANAGPNTNGSQFFICTAK	Peptidyl-prolyl cis-trans isomerase A	P62937	PPIA		-2.31287	-2.31287
HTGPITCLQFNPK	WD repeat-containing protein 82	Q6UXN9	WDR82	0.296598		0.296598
HTHIDKPDCSGPPMDISNK	Transmembrane 9 superfamily member 2	Q99805	TM9SF2	2.88222	-0.651134	1.11554	0.192839
HTLDGAACLLNSNK	MOB-like protein phocein	Q9Y3A3	MOB4	-0.396615	0.542132	0.0727585	0.0447475
HTNPIVENGQTHPCQK	Transportin-3	Q9Y5L0	TNPO3	-0.987413	2.10175	0.55717	0.108126
HTVFVLDDGTVYTCGCNDLGQLGHEK	Probable E3 ubiquitin-protein ligase HERC4	Q5GLZ8	HERC4	-0.407171		-0.407171
HVLTGSADNSCR	Eukaryotic translation initiation factor 3 subunit I	Q13347	EIF3I		-0.115496	-0.115496
HYAHTDCPGHADYVK	Elongation factor Tu, mitochondrial	P49411	TUFM	0.502852	0.695248	0.59905	0.99411
IAACQEQILR	Programmed cell death protein 2-like	Q9BRP1	PDCD2L	2.83648	1.23927	2.03787	0.623842
IAAESSENVDCPENPK	Leucine-rich repeat flightless-interacting protein 1	Q32MZ4	LRRFIP1	1.11688	1.3929	1.25489	1.15656
IACGPPQAK	Protein PRRC2C	Q9Y520	PRRC2C		1.74867	1.74867
IACHEEPVMDLDFDSQK	Guanine nucleotide-binding protein subunit beta-like protein 1	Q9BYB4	GNB1L	-0.589952		-0.589952
IADFGMCK	Protein kinase C beta type	P05771	PRKCB		0.126685	0.126685
IAEVDCTAER	Thioredoxin domain-containing protein 5	Q8NBS9	TXNDC5		0.228253	0.228253
IAIKNCDGVPALVR	Catenin delta-1	O60716	CTNND1	0.532302	0.713221	0.622762	1.03701
IAILTCPFEPPKPK	T-complex protein 1 subunit epsilon	P48643	CCT5		1.04006	1.04006
IALESEGRPEEQMESDNCSGGDDDWTHLSSK	Sequestosome-1	Q13501	SQSTM1	0.342824	0.22108	0.281952	0.868494
IAPQYYDMSNFPQCEAKR	Pre-mRNA-splicing factor ATP-dependent RNA helicase DHX15	O43143	DHX15	-0.249544		-0.249544
IATCSDDNTLK	Denticleless protein homolog	Q9NZJ0	DTL	1.2955		1.2955
IATGHNIIDELPPCK	Synaptophysin-like protein 1	Q16563	SYPL1	0.232894	0.0442478	0.138571	0.419677
IATGHNIIDELPPCKK	Synaptophysin-like protein 1	Q16563	SYPL1	1.31832	2.37579	1.84706	0.750825
IAVHCTVR	60S ribosomal protein L11	P62913	RPL11	0.259469	0.0797464	0.169607	0.508398
IAVYSCPFDGMITETK	T-complex protein 1 subunit theta	P50990	CCT8		-0.0260657	-0.0260657
ICANHYITPMMELKPNAGSDR	Ran-specific GTPase-activating protein	P43487	RANBP1		-2.45359	-2.45359
ICANKYMVK	60S ribosomal protein L10	P27635	RPL10	0.587052	0.481883	0.534468	1.20458
ICAVGITK	Exportin-2	P55060	CSE1L		0.965091	0.965091
ICCIGAGYVGGPTCSVIAHMCPEIR	UDP-glucose 6-dehydrogenase	O60701	UGDH		2.67104	2.67104
ICDECNYGSYQGR	PHD finger-like domain-containing protein 5A	Q7RTV0	PHF5A	-0.0706374		-0.0706374
ICEPGYSPTYK	Cathepsin B	P07858	CTSB	0.323624	0.559753	0.441689	0.779153
ICEPGYSPTYKQDK	Cathepsin B	P07858	CTSB	0.912896	2.39541	1.65416	0.57154
ICGDIHGQYYDLLR	Serine/threonine-protein phosphatase PP1-alpha catalytic subunit	P62136	PPP1CA		-0.618625	-0.618625
ICLQPPPTSR	Valine--tRNA ligase	P26640	VARS1	2.33015		2.33015
ICMLTFEHEMEK	Probable E3 ubiquitin-protein ligase makorin-2	Q9H000	MKRN2	-0.82466		-0.82466
ICMNEDPAKRPK	Integrin-linked protein kinase	Q13418	ILK	1.38461		1.38461
ICNEILTSPCSPEIR	Condensin complex subunit 3	Q9BPX3	NCAPG		1.27694	1.27694
ICSWNVDGLR	DNA-(apurinic or apyrimidinic site) lyase	P27695	APEX1	0.664517	0.651054	0.657786	2.18609
ICVNGDDAHPLWK	Phospholipid hydroperoxide glutathione peroxidase	P36969	GPX4	1.01247	0.751126	0.881798	1.02846
ICYIFHETFGR	Dynamin-1-like protein	O00429	DNM1L	4.1103		4.1103
IDPTVTMMQVEEKPDVTYSDVGGCKEQIEK	26S proteasome regulatory subunit 7	P35998	PSMC2	0.816667	0.780816	0.798741	1.84513
IDYCILDPCR	Delta and Notch-like epidermal growth factor-related receptor	Q8NFT8	DNER	1.15488		1.15488
IEGDMIVCAAYAHELPK	60S ribosomal protein L5	P46777	RPL5	-0.0931016	0.352233	0.129566	0.1775
IENLELMSQHGCNAWK	Pre-mRNA-splicing factor SPF27	O75934	BCAS2	1.69519	1.53841	1.6168	1.51087
IENRFPDEATCMGFCAPK	Tissue factor pathway inhibitor 2	P48307	TFPI2	0.360407	0.30402	0.332214	1.26843
IFCCHGGLSPDLQSMEQIR	Serine/threonine-protein phosphatase PP1-alpha catalytic subunit	P62136	PPP1CA	-0.659713	0.138395	-0.260659	0.199529
IGAFGYMECSAK	Transforming protein RhoA	P61586	RHOA	0.218215	-0.0430557	0.0875795	0.204803
IGKPHTVPCK	40S ribosomal protein S2	P15880	RPS2	0.549102	-0.48811	0.0304961	0.0165508
IGNCPFSQR	Chloride intracellular channel protein 1	O00299	CLIC1	-0.336061	-0.354848	-0.345454	1.76179
IGSCTQQDVELHVQK	Aspartate--tRNA ligase, cytoplasmic	P14868	DARS1		-0.0377668	-0.0377668
IGSSLYALGTQDSTDICK	Sorting nexin-6	Q9UNH7	SNX6		1.58059	1.58059
IHECQWVVEDAPNPDVLLSHKDDVK	Protein Niban 1	Q9BZQ8	NIBAN1	0.607272	0.636599	0.621936	1.82372
IHMGSCAENTAK	Acetyl-CoA acetyltransferase, mitochondrial	P24752	ACAT1	0.629564	0.745507	0.687536	1.27123
IIANALSSEPACLAEIEEDKAR	DNA-dependent protein kinase catalytic subunit	P78527	PRKDC		0.665445	0.665445
IIDINYYPVPEACLSNKR	Ribonucleoside-diphosphate reductase large subunit	P23921	RRM1	0.883973	1.22112	1.05255	0.995245
IIHEDGYSEDECKQYK	Guanine nucleotide-binding protein G(i) subunit alpha	P08754	GNAI3	0.485756	0.406534	0.446145	1.24892
IIHEDGYSEEECR	Guanine nucleotide-binding protein G(i) subunit alpha-2	P04899	GNAI2	0.450146	0.60773	0.528938	1.02622
IIMCAWNPR	Thymidylate synthase	P04818	TYMS	-0.286848	3.1652	1.43918	0.253726
IINDNATYCR	Nucleolar protein 56	O00567	NOP56	1.8738		1.8738
IIPGFMCQGGDFTR	Peptidyl-prolyl cis-trans isomerase A	P62937	PPIA		6.10849	6.10849
IISANGCK	Sodium/potassium-transporting ATPase subunit alpha-1	P05023	ATP1A1	0.0224708		0.0224708
IISANGCKVDNSSLTGESEPQTR	Sodium/potassium-transporting ATPase subunit alpha-1	P05023	ATP1A1	0.575706	3.18685	1.88128	0.413164
IISNASCTTNCLAPLAK	Glyceraldehyde-3-phosphate dehydrogenase	P04406	GAPDH	-0.390464	-0.452609	-0.421536	1.32937
IIYGGSVTGATCK	Triosephosphate isomerase	P60174	TPI1	-3.40906		-3.40906
IKCVAFD	Galectin-1	P09382	LGALS1	-0.088136	-0.0176367	-0.0528863	0.426817
IKNCLNPQFSK	Copine-3	O75131	CPNE3	0.365034	0.451884	0.408459	1.17116
IKNPSIDLCTCPR	Putative ATP-dependent RNA helicase DHX57	Q6P158	DHX57		-0.332536	-0.332536
IKSGEEDFESLASQFSDCSSAK	Peptidyl-prolyl cis-trans isomerase NIMA-interacting 1	Q13526	PIN1		-1.21183	-1.21183
ILACDDLDEAAR	Succinate--CoA ligase [ADP-forming] subunit beta, mitochondrial	Q9P2R7	SUCLA2	1.7336		1.7336
ILAFPCNQFGK	Phospholipid hydroperoxide glutathione peroxidase	P36969	GPX4		-0.744702	-0.744702
ILCDVPCSGDGTMR	RNA cytosine C(5)-methyltransferase NSUN2	Q08J23	NSUN2		0.90223	0.90223
ILDDICVAK	Lysine--tRNA ligase	Q15046	KARS1	-1.06489		-1.06489
ILEIPGPGDNQHFGDLHQTELGPSGAGCQVGINQNGTGK	Enhancer of mRNA-decapping protein 3	Q96F86	EDC3	0.919662	0.117377	0.51852	0.377595
ILGENAKPNYGCQVTIQSEQEK	Activating signal cointegrator 1 complex subunit 3	Q8N3C0	ASCC3		-0.877801	-0.877801
ILLNACCPGWVR	Carbonyl reductase [NADPH] 1	P16152	CBR1	-1.45256	-0.681804	-1.06718	0.656362
ILRGQDHCGIESEVVAGIPR	Cathepsin B	P07858	CTSB	1.00578	0.509807	0.757794	0.696071
ILRPGGCLFLKEPVETAVDNNSK	Anamorsin	Q6FI81	CIAPIN1	-0.134759	0.803946	0.334593	0.217722
ILTCNGSVDDSR	Muskelin	Q9UL63	MKLN1	-0.109361		-0.109361
ILVALCGGN	Annexin A1	P04083	ANXA1	-0.772575		-0.772575
ILYSQCGDVMR	Myosin light polypeptide 6	P60660	MYL6		1.43957	1.43957
IMDCVGCFK	ERO1-like protein alpha	Q96HE7	ERO1A	-1.35511	-1.24122	-1.29817	1.55427
IMRECQEESFWK	OCIA domain-containing protein 2	Q56VL3	OCIAD2	0.0403958	-0.717748	-0.338676	0.271004
IMRECQEESFWKR	OCIA domain-containing protein 2	Q56VL3	OCIAD2	0.169894	0.370865	0.27038	0.644882
INDALSCEYECR	Protein FAM98B	Q52LJ0	FAM98B	3.19905		3.19905
INISEGNCPER	Poly(rC)-binding protein 1	Q15365	PCBP1	1.40478	0.65924	1.03201	0.656262
INLANCTSR	Anillin	Q9NQW6	ANLN	-1.25295		-1.25295
INPICNDHYR	Lymphokine-activated killer T-cell-originated protein kinase	Q96KB5	PBK	3.33883	2.35226	2.84555	0.961481
INPYMSSPCHIEMILTEK	60S ribosomal protein L17	P18621	RPL17		0.152431	0.152431
IPCNDSK	Eukaryotic translation initiation factor 3 subunit I	Q13347	EIF3I		0.472536	0.472536
IPSFCYSPKDEGLCSANVTR	Tissue factor pathway inhibitor 2	P48307	TFPI2	-0.53992	2.39802	0.929051	0.193152
IRGEEPAVTEETLCVGLAR	Diphthine methyl ester synthase	Q9H2P9	DPH5		-1.73589	-1.73589
ISAFGYLECSAK	Rho-related GTP-binding protein RhoC	P08134	RHOC	0.229396		0.229396
ISCMSKPPAPNPTPPR	Dual specificity mitogen-activated protein kinase kinase 3	P46734	MAP2K3	0.0546821	0.801277	0.427979	0.340443
ISIQCR	DNA replication licensing factor MCM5	P33992	MCM5		-0.295114	-0.295114
ISLNSLCYGDMDK	Copine-3	O75131	CPNE3		-1.08415	-1.08415
ISNGDVILVYGCSSLVSR	Translation initiation factor eIF-2B subunit delta	Q9UI10	EIF2B4		-1.63587	-1.63587
ISSTLKVEPCSLTPGYTK	Elongator complex protein 4	Q96EB1	ELP4		1.87726	1.87726
ITASEALKHPWICQR	Calcium/calmodulin-dependent protein kinase type II subunit delta	Q13557	CAMK2D	0.1262		0.1262
ITHSPLTICFPEYTGANKYDEAASYIQSK	Guanine nucleotide-binding protein G(i) subunit alpha-2	P04899	GNAI2		-1.41437	-1.41437
ITIADCGQLE	Peptidyl-prolyl cis-trans isomerase A	P62937	PPIA		-1.94136	-1.94136
IVCTPGQGLGDLR	Transportin-3	Q9Y5L0	TNPO3	0.682081		0.682081
IVDGACLNHFTR	Checkpoint protein HUS1	O60921	HUS1	0.371499		0.371499
IVEAGCVCNDAVIR	Calcium-transporting ATPase type 2C member 1	P98194	ATP2C1		-0.115898	-0.115898
IVEDDASISSCNK	Wings apart-like protein homolog	Q7Z5K2	WAPL		2.79647	2.79647
IVLRLECVEPNCR	60S ribosomal protein L36a	P83881	RPL36A	-0.0825168	-0.0665691	-0.074543	1.16851
IVSLPECFNSPYGAK	Omega-amidase NIT2	Q9NQR4	NIT2	-0.4934	0.143363	-0.175018	0.167478
IVTCGTDR	Actin-related protein 2/3 complex subunit 1B	O15143	ARPC1B		-0.25946	-0.25946
IVVEHIIMKPACPLFVR	Transmembrane protein 33	P57088	TMEM33	0.255467	0.408037	0.331752	0.841979
IVYICCGEDHTAALTK	Probable E3 ubiquitin-protein ligase HERC4	Q5GLZ8	HERC4		0.06521	0.06521
IWEQIQPDLHTNDECVATYK	Aminoacyl tRNA synthase complex-interacting multifunctional protein 1	Q12904	AIMP1		-0.274025	-0.274025
IWGTEGDSWICK	Probable cytosolic iron-sulfur protein assembly protein CIAO1	O76071	CIAO1	0.62438	0.269348	0.446864	0.618476
IWLEPCIR	Ubiquitin carboxyl-terminal hydrolase 48	Q86UV5	USP48	0.2295		0.2295
IYCEDKQTFLQDCEDDGETAAGGR	Protein IMPACT	Q9P2X3	IMPACT	-0.276927	0.520399	0.121736	0.0908044
IYGFYDECK	Serine/threonine-protein phosphatase PP1-alpha catalytic subunit	P62136	PPP1CA	-0.0373744	0.32045	0.141538	0.241152
IYHPNIDEKGQVCLPVISAENWKPATK	Ubiquitin-conjugating enzyme E2 L3	P68036	UBE2L3	2.81653	1.23818	2.02735	0.626493
KAAAPAPEEEMDECEQALAAEPK	Elongation factor 1-gamma	P26641	EEF1G	-0.380233	0.537399	0.0785827	0.0496292
KACADATLSQITNNIDPVGR	Guanine nucleotide-binding protein G(I)/G(S)/G(T) subunit beta-1	P62873	GNB1	1.19352	1.54703	1.37027	1.08795
KACGDSTLTQITAGLDPVGR	Guanine nucleotide-binding protein G(I)/G(S)/G(T) subunit beta-2	P62879	GNB2	0.430576	0.0704788	0.250527	0.401526
KACNDATLVQITSNMDSVGR	Guanine nucleotide-binding protein subunit beta-4	Q9HAV0	GNB4		-0.589123	-0.589123
KACQIFVR	Heterogeneous nuclear ribonucleoprotein M	P52272	HNRNPM	-0.662894	-0.482684	-0.572789	1.00291
KADVEGELLACR	Proliferation marker protein Ki-67	P46013	MKI67	0.618526		0.618526
KAEAATEACQLPTSSGDAGR	DCN1-like protein 3	Q8IWE4	DCUN1D3		0.759852	0.759852
KAHEILPNLVCCSAK	T-complex protein 1 subunit theta	P50990	CCT8		0.777536	0.777536
KAQCPIVER	40S ribosomal protein S5	P46782	RPS5	-0.281444	-0.168335	-0.224889	0.804536
KATVFLNPAACK	Acylglycerol kinase, mitochondrial	Q53H12	AGK		1.38894	1.38894
KCAGCTNPISGLGGTK	Four and a half LIM domains protein 2	Q14192	FHL2		0.474386	0.474386
KCEVLCSQSNKPVTLTVEQSR	Transmembrane 9 superfamily member 4	Q92544	TM9SF4	0.409342	-0.295583	0.0568796	0.0466551
KCPFTGNVSIR	40S ribosomal protein S11	P62280	RPS11	0.423416	0.830955	0.627186	0.699001
KCSLPAEEDSVLEK	Microtubule-associated protein 4	P27816	MAP4	2.51792	0.326516	1.42222	0.378924
KCSLSLVGR	Four and a half LIM domains protein 2	Q14192	FHL2	0.893155	-0.285995	0.30358	0.156591
KCSTPEEIK	Destrin	P60981	DSTN		-0.117177	-0.117177
KCSTPEEIKK	Destrin	P60981	DSTN		0.21776	0.21776
KDDYEYCMSEYLR	Geranylgeranyl transferase type-2 subunit beta	P53611	RABGGTB	0.0662147		0.0662147
KDVLIEFYAPWCGHCK	Protein disulfide-isomerase A4	P13667	PDIA4		-0.226115	-0.226115
KEAESCDCLQGFQLTHSLGGGTGSGMGTLLISK	Tubulin beta-4B chain	P68371	TUBB4B		1.09999	1.09999
KECEHCDCLQGFQLTHSLGGGTGSGMGTLLISK	Tubulin beta-6 chain	Q9BUF5	TUBB6		-0.536758	-0.536758
KEEECQAGAAEMR	CDK5 regulatory subunit-associated protein 3	Q96JB5	CDK5RAP3	1.43633		1.43633
KEEGSFQSCSFCKPK	Gremlin-1	O60565	GREM1	3.22243	0.781611	2.00202	0.457783
KENQWCEEK	S-phase kinase-associated protein 1	P63208	SKP1	-0.115347	0.0742266	-0.0205602	0.0634774
KENSSEICSNNGECVCGQCVCR	Integrin beta-1	P05556	ITGB1	0.0729896		0.0729896
KFATCNPSTR	Aldehyde dehydrogenase family 1 member A3	P47895	ALDH1A3	0.434194		0.434194
KFLDGNEMTLADCNLLPK	Chloride intracellular channel protein 4	Q9Y696	CLIC4		-1.45144	-1.45144
KFMADCPHTIGVEFGTR	Ras-related protein Rab-14	P61106	RAB14	0.533242	2.03099	1.28212	0.47296
KGADIMYTGTVDCWR	ADP/ATP translocase 3	P12236	SLC25A6	1.25688	0.213254	0.735065	0.405603
KGADIMYTGTVDCWRK	ADP/ATP translocase 3	P12236	SLC25A6	-0.13386	0.0100143	-0.0619231	0.261586
KGDECELLGHSK	Elongation factor Tu, mitochondrial	P49411	TUFM	0.394816	-0.266649	0.0640834	0.0564278
KGLIDYNFHCFR	Ras-related GTP-binding protein C	Q9HB90	RRAGC		1.22357	1.22357
KGSSNNQDVVTCDMACK	Transmembrane protein 214	Q6NUQ4	TMEM214		-1.22224	-1.22224
KGTDIMYTGTLDCWR	ADP/ATP translocase 2	P05141	SLC25A5	0.0549313	1.86367	0.959301	0.317637
KGTDIMYTGTLDCWRK	ADP/ATP translocase 2	P05141	SLC25A5	0.847718	0.618185	0.732951	1.00489
KGTQCVEQIQELVLR	BRCA2 and CDKN1A-interacting protein	Q9P287	BCCIP	0.644354	-0.599611	0.0223717	0.0100558
KGVLFGVPGAFTPGCSK	Peroxiredoxin-5, mitochondrial	P30044	PRDX5	-1.42418	-0.254173	-0.839179	0.411653
KICAVGITK	Exportin-2	P55060	CSE1L	0.356428	0.571631	0.464029	0.838456
KICMQR	40S ribosomal protein S4, X isoform	P62701	RPS4X		-0.0544445	-0.0544445
KIPSFCYSPK	Tissue factor pathway inhibitor 2	P48307	TFPI2	0.700211		0.700211
KIPSFCYSPKDEGLCSANVTR	Tissue factor pathway inhibitor 2	P48307	TFPI2	0.505677	0.404666	0.455171	1.15273
KKLVIVGDGACGK	Transforming protein RhoA	P61586	RHOA	0.302696	0.784436	0.543566	0.575853
KKVCDIAAELAR	Importin-5	O00410	IPO5	0.218905		0.218905
KLAPTCK	Protein Niban 2	Q96TA1	NIBAN2	-0.0604602		-0.0604602
KLFAPQQILQCSPAN	Thymidine kinase, cytosolic	P04183	TK1	0.57144	0.192809	0.382125	0.533377
KLGEWVGLCK	40S ribosomal protein S12	P25398	RPS12	-0.154991	-0.352688	-0.25384	0.626341
KLGNNCVFAPADVTSEKDVQTALALAK	3-hydroxyacyl-CoA dehydrogenase type-2	Q99714	HSD17B10		0.831319	0.831319
KLLAPDCEIIQEVGK	Exosome complex component RRP40	Q9NQT5	EXOSC3	-0.143572	0.382275	0.119352	0.137439
KLLMMAGIDDCYTSAR	40S ribosomal protein S2	P15880	RPS2	0.505929	0.969622	0.737776	0.712562
KLLPDDPYEKACQK	Glutathione S-transferase omega-1	P78417	GSTO1	-0.714255	-0.713125	-0.71369	3.29768
KLQFFCDPR	Acylglycerol kinase, mitochondrial	Q53H12	AGK		1.02016	1.02016
KLSYAEVCQKPPKEPSSVLVQPLR	La-related protein 4	Q71RC2	LARP4		1.75362	1.75362
KLVEALCAAGHR	Thymidylate kinase	P23919	DTYMK	2.04804	0.836736	1.44239	0.59674
KLVIVGDGACGK	Transforming protein RhoA	P61586	RHOA	0.516108	-0.346592	0.0847578	0.0572572
KMLSSGVCTSTVQLPGK	Retinol dehydrogenase 11	Q8TC12	RDH11	-0.696449	-0.203951	-0.4502	0.496699
KNCPHVVVGTPGR	ATP-dependent RNA helicase DDX39A	O00148	DDX39A		0.488105	0.488105
KNEPPLTCPYSLK	Translocation protein SEC63 homolog	Q9UGP8	SEC63	0.49708		0.49708
KNINCSIEESFQR	Hydroxymethylglutaryl-CoA lyase, mitochondrial	P35914	HMGCL	-0.867564		-0.867564
KNMQITILTCR	Proteasome assembly chaperone 1	O95456	PSMG1	0.304672	-0.568953	-0.13214	0.0899161
KPADDQDPIDALSGDLDSCPSTTETSQNTAK	Calpastatin	P20810	CAST		0.271335	0.271335
KPASFMTSICDER	ATP-citrate synthase	P53396	ACLY		5.58496	5.58496
KPMESSSVVSCR	Cell division cycle-associated protein 2	Q69YH5	CDCA2	1.17339		1.17339
KPNSVVISCGMK	Developmentally-regulated GTP-binding protein 2	P55039	DRG2		-1.611	-1.611
KPSYAEICQR	La-related protein 4B	Q92615	LARP4B		1.24662	1.24662
KQCALAALR	6-phosphofructo-2-kinase/fructose-2,6-bisphosphatase 3	Q16875	PFKFB3	1.07582	-1.02429	0.0257686	0.00683708
KQCVDHYNEVK	NADH dehydrogenase [ubiquinone] 1 alpha subcomplex subunit 10, mitochondrial	O95299	NDUFA10	5.43016	0.418789	2.92447	0.345824
KQPFCDGSHFFQR	CDGSH iron-sulfur domain-containing protein 3, mitochondrial	P0C7P0	CISD3		0.601447	0.601447
KSCCSCCPVGCAK	Metallothionein-2	P02795	MT2A	-0.648463	-0.05449	-0.351477	0.350052
KSSGEIVYCGQVFEK	60S ribosomal protein L18a	Q02543	RPL18A	-0.414221	-0.328136	-0.371178	1.13374
KTATAVAHCK	40S ribosomal protein S16	P62249	RPS16	2.81034		2.81034
KTCAAQLVSYPGK	Nuclear cap-binding protein subunit 1	Q09161	NCBP1		1.1668	1.1668
KTFVGTPCWMAPEVMEQVR	STE20/SPS1-related proline-alanine-rich protein kinase	Q9UEW8	STK39		0.0752017	0.0752017
KTYITDPVSAPCAPPLQPK	Lipoma-preferred partner	Q93052	LPP		-0.0350298	-0.0350298
KVACIGAWHPAR	60S ribosomal protein L3	P39023	RPL3		0.714076	0.714076
KVIGIECSSISDYAVK	Protein arginine N-methyltransferase 1	Q99873	PRMT1	0.0252531	0.248414	0.136833	0.361007
KVVGCSCVVVK	40S ribosomal protein S12	P25398	RPS12	-0.44094	-0.498234	-0.469587	1.41129
KVVGCSCVVVKDYGK	40S ribosomal protein S12	P25398	RPS12	-0.410497	-0.254538	-0.332518	0.833732
KYDGYTSCPLVTGYNR	Sulfide:quinone oxidoreductase, mitochondrial	Q9Y6N5	SQOR	3.82866	0.785975	2.30732	0.430508
KYEDICPSTHNMDVPNIK	Eukaryotic translation initiation factor 5A-1	P63241	EIF5A	-0.602808	-0.393058	-0.497933	0.878921
KYEDICPSTHNMDVPNIKR	Eukaryotic translation initiation factor 5A-1	P63241	EIF5A	-0.282864	-0.347842	-0.315353	1.18471
KYNPTWHCIVGR	Dynein light chain 1, cytoplasmic	P63167	DYNLL1		0.620979	0.620979
KYTELPHGAISEDQAVGPADIPCDSTGQTST	dCTP pyrophosphatase 1	Q9H773	DCTPP1	-0.650336	0.417094	-0.116621	0.063966
LAAPDPCDPQR	PRA1 family protein 2	O60831	PRAF2	0.548098	0.501038	0.524568	1.5446
LACDLLPCNSDLR	Ankyrin repeat domain-containing protein 39	Q53RE8	ANKRD39	-1.52012		-1.52012
LAEQAERYDDMATCMK	14-3-3 protein theta	P27348	YWHAQ	-0.330186	0.10683	-0.111678	0.155393
LAEYKCNTNTAIELK	Histone acetyltransferase type B catalytic subunit	O14929	HAT1	0.39811	-0.158885	0.119613	0.129747
LAGANPAVITCDELLLGHEK	DNA-dependent protein kinase catalytic subunit	P78527	PRKDC	1.09973	4.55848	2.82911	0.456807
LASCSDDR	Probable cytosolic iron-sulfur protein assembly protein CIAO1	O76071	CIAO1	1.4764	-0.217303	0.629551	0.226922
LASGCDGSEIPDEVK	STE20/SPS1-related proline-alanine-rich protein kinase	Q9UEW8	STK39	-0.599172	-0.452979	-0.526076	1.05604
LASGEDDPFDSDFSCPVK	Nuclear pore complex protein Nup88	Q99567	NUP88	1.16488		1.16488
LASQAATTMCER	Centrosomal protein of 41 kDa	Q9BYV8	CEP41		2.53007	2.53007
LCASGAGATPDTAIEEIKEK	Cytosolic Fe-S cluster assembly factor NUBP1	P53384	NUBP1	-1.13435	-0.00680366	-0.570578	0.304359
LCDLLSHLQR	Caspase recruitment domain-containing protein 19	Q96LW7	CARD19	0.181466	1.10574	0.643603	0.401816
LCFLDKVEPHATIAEIK	Very-long-chain enoyl-CoA reductase	Q9NZ01	TECR	0.529652	0.317615	0.423634	0.806559
LCFSTAQHAS	Heterogeneous nuclear ribonucleoprotein L	P14866	HNRNPL		0.317275	0.317275
LCGSGFQSIVNGCQEICVK	3-ketoacyl-CoA thiolase, mitochondrial	P42765	ACAA2		-0.258807	-0.258807
LCHPCWEVR	BRCA1-associated ATM activator 1	Q6PJG6	BRAT1	0.7323	0.933296	0.832798	1.1166
LCPNSTGAEIR	26S proteasome regulatory subunit 7	P35998	PSMC2	0.30848	-0.0524756	0.128002	0.216619
LCQDLPCFSR	Histone acetyltransferase type B catalytic subunit	O14929	HAT1	0.429399	0.186287	0.307843	0.62085
LCQIPVHGASVPK	Latent-transforming growth factor beta-binding protein 1	Q14766	LTBP1		1.12371	1.12371
LCRPCQAAVEYYIK	Transmembrane protein 201	Q5SNT2	TMEM201	-0.355744		-0.355744
LCSGVLGTVVHGK	Mitochondrial carrier homolog 2	Q9Y6C9	MTCH2	0.329849	0.202174	0.266011	0.824083
LCTQLEGLQSTVTGHVER	Enhancer of mRNA-decapping protein 4	Q6P2E9	EDC4	-6.61393	-5.01975	-5.81684	1.06199
LCTSATESEVAR	Cytochrome b-c1 complex subunit 1, mitochondrial	P31930	UQCRC1	0.24629	-0.0420691	0.102111	0.216309
LCTSVTESEVAR	Mitochondrial-processing peptidase subunit beta	O75439	PMPCB	-1.97187	-2.97688	-2.47438	0.894315
LDALEWESCFNK	Golgi-specific brefeldin A-resistance guanine nucleotide exchange factor 1	Q92538	GBF1		-3.93166	-3.93166
LDILIHNAGISSCGR	Dehydrogenase/reductase SDR family member 13	Q6UX07	DHRS13	-1.93036	-1.99292	-1.96164	1.99354
LDPDMAFCANIR	Procollagen-lysine,2-oxoglutarate 5-dioxygenase 1	Q02809	PLOD1	0.907713		0.907713
LDSSACLHAVGDK	Glutamine--fructose-6-phosphate aminotransferase [isomerizing] 2	O94808	GFPT2	0.382074		0.382074
LDVGNFSWGSECCTR	40S ribosomal protein S8	P62241	RPS8	0.318104	0.581258	0.449681	0.741802
LDVGNFSWGSECCTRK	40S ribosomal protein S8	P62241	RPS8	0.221587	0.300465	0.261026	1.02015
LEAMKLNECVDHTPK	Glutathione S-transferase omega-1	P78417	GSTO1	-0.195145	1.25234	0.528599	0.223002
LECGGSAMEDK	Aldehyde dehydrogenase family 1 member A3	P47895	ALDH1A3	7.02104	1.44105	4.23104	0.430479
LECVEPNCR	60S ribosomal protein L36a	P83881	RPL36A	0.0581577	0.113048	0.0856029	0.704399
LEPAGPACPEGGR	Conserved oligomeric Golgi complex subunit 8	Q96MW5	COG8		-2.46642	-2.46642
LESGSICK	Eukaryotic peptide chain release factor GTP-binding subunit ERF3A	P15170	GSPT1		0.526196	0.526196
LFCVGFTK	40S ribosomal protein S3a	P61247	RPS3A	0.101157	-0.129504	-0.0141737	0.0351975
LFDSICNNK	Guanine nucleotide-binding protein G(i) subunit alpha-2	P04899	GNAI2	0.249865		0.249865
LFFIQACR	Caspase-7	P55210	CASP7	-1.15829		-1.15829
LFIIQACR	Caspase-3	P42574	CASP3		0.00204446	0.00204446
LFQECCPHSTDR	Heterogeneous nuclear ribonucleoprotein K	P61978	HNRNPK	0.496354	0.601217	0.548786	1.21724
LFTCPTLETTNFK	Vacuolar protein sorting-associated protein 26C	O14972	VPS26C	-0.292963	-0.778721	-0.535842	0.567153
LFTESCSISPK	Testis-expressed protein 264	Q9Y6I9	TEX264	0.176525	1.27183	0.724178	0.384891
LFVSGACDASAK	Guanine nucleotide-binding protein G(I)/G(S)/G(T) subunit beta-1	P62873	GNB1	0.295089	0.24753	0.271309	1.25449
LGEDMLCLLHGR	Inositol 1,4,5-trisphosphate receptor-interacting protein	Q8IWB1	ITPRIP		-0.770755	-0.770755
LGEWVGLCK	40S ribosomal protein S12	P25398	RPS12	0.0163732	0.053802	0.0350876	0.505942
LGEWVGLCKIDR	40S ribosomal protein S12	P25398	RPS12	0.24782	-0.0749426	0.0864387	0.163073
LGGEVSCLVAGTK	Electron transfer flavoprotein subunit alpha, mitochondrial	P13804	ETFA		0.11276	0.11276
LGGTCVNVGCVPK	Glutathione reductase, mitochondrial	P00390	GSR	0.231009	0.206933	0.218971	1.45639
LGIQGSYFCSQECFK	Methionine aminopeptidase 1	P53582	METAP1	-0.0157169	-0.512793	-0.264255	0.318312
LGLDICSAK	Trans-3-hydroxy-L-proline dehydratase	Q96EM0	L3HYPDH	-0.329415	0.288973	-0.0202212	0.0184421
LGNSCEFR	Double-stranded RNA-specific adenosine deaminase	P55265	ADAR		0.0457013	0.0457013
LGSISCK	Tyrosine--tRNA ligase, cytoplasmic	P54577	YARS1	0.266166		0.266166
LGTQTFCSR	Extended synaptotagmin-1	Q9BSJ8	ESYT1	2.27006	2.54569	2.40787	1.43892
LGYTPVCR	Platelet-activating factor acetylhydrolase IB subunit gamma	Q15102	PAFAH1B3	-0.00524157		-0.00524157
LHCSMLAEDAIK	Iron-sulfur cluster assembly enzyme ISCU, mitochondrial	Q9H1K1	ISCU	0.196506	2.38511	1.29081	0.349044
LHFDNCVLKPATEGK	ATPase family AAA domain-containing protein 3B	Q5T9A4	ATAD3B		0.959446	0.959446
LHIVQVVCK	Chloride intracellular channel protein 1	O00299	CLIC1	-0.377099	-0.49577	-0.436435	1.06538
LHIVQVVCKK	Chloride intracellular channel protein 1	O00299	CLIC1	-1.63158		-1.63158
LHLCKPLIR	PCI domain-containing protein 2	Q5JVF3	PCID2	1.59353		1.59353
LHLDYIGPCK	SPARC	P09486	SPARC	1.52075	0.407308	0.964027	0.477032
LHYCVSCAIHSK	40S ribosomal protein S26	P62854	RPS26	0.115175	0.256249	0.185712	0.636228
LIDFLECGK	Probable ATP-dependent RNA helicase DDX5	P17844	DDX5	1.6843	1.91292	1.79861	1.39356
LIEMTAEYACTR	Complex I assembly factor ACAD9, mitochondrial	Q9H845	ACAD9	2.04049		2.04049
LIGMNCTLMK	Ribonucleoside-diphosphate reductase subunit M2	P31350	RRM2	-4.12363		-4.12363
LIGNLCYK	Ataxin-10	Q9UBB4	ATXN10	-1.52532		-1.52532
LIGPNCPGVINPGECK	Succinate--CoA ligase [ADP/GDP-forming] subunit alpha, mitochondrial	P53597	SUCLG1	0.0466671	0.251381	0.149024	0.416635
LIIVEGCQR	Sodium/potassium-transporting ATPase subunit alpha-1	P05023	ATP1A1		0.40301	0.40301
LIPDGCGVK	60S ribosomal protein L10	P27635	RPL10	0.358021	0.350998	0.354509	2.20026
LIQQVAQEIWVCEK	ATP-binding cassette sub-family F member 2	Q9UG63	ABCF2		1.1593	1.1593
LISETTSVCKPEQVAK	3-ketodihydrosphingosine reductase	Q06136	KDSR	0.120326	0.335909	0.228118	0.551259
LITEDVQGKNCLTNFHGMDLTR	40S ribosomal protein S3a	P61247	RPS3A	0.261698	0.232311	0.247004	1.42221
LITIEINPDCAAITQR	Catechol O-methyltransferase	P21964	COMT		-0.00232499	-0.00232499
LITWSPVCR	Glutathione peroxidase 1	P07203	GPX1	0.213455	0.24555	0.229503	1.35221
LIVIGCGTSYHAAVATR	Glutamine--fructose-6-phosphate aminotransferase [isomerizing] 2	O94808	GFPT2	0.974893		0.974893
LKAACNLLQR	ATP-dependent 6-phosphofructokinase, platelet type	Q01813	PFKP	6.21562		6.21562
LKECMDMLR	Glutaminase kidney isoform, mitochondrial	O94925	GLS	-0.0320869	-0.229168	-0.130627	0.385694
LKEQCGCR	UDP-glucose 4-epimerase	Q14376	GALE		0.286801	0.286801
LKETCVSGEDPTQGADLSPDEK	A-kinase anchor protein 12	Q02952	AKAP12	0.566705	-2.54396	-0.988629	0.194134
LKNCGCLGASPNLEQLQEENLK	Arginine--tRNA ligase, cytoplasmic	P54136	RARS1	0.84856	0.0907406	0.46965	0.364334
LKPDPEPDDKNQEPSSCK	PSME3-interacting protein	Q9GZU8	PSME3IP1	1.54079		1.54079
LKVCALR	60S ribosomal protein L18	Q07020	RPL18		-0.255192	-0.255192
LLACIASRPGQCGR	40S ribosomal protein S8	P62241	RPS8	0.522284	0.256003	0.389143	0.678062
LLACIASRPGQCGRADGYVLEGK	40S ribosomal protein S8	P62241	RPS8		2.14165	2.14165
LLALTSSDLGCQPSRT	Transmembrane protein 192	Q8IY95	TMEM192		3.03023	3.03023
LLCGKETMVTSTTEPSR	Glucosidase 2 subunit beta	P14314	PRKCSH	0.839388		0.839388
LLCPFER	F-box only protein 30	Q8TB52	FBXO30		0.59846	0.59846
LLDIACWIHHK	Cathepsin D	P07339	CTSD	0.415463	0.364109	0.389786	1.37802
LLDLVQQSCNYK	NHP2-like protein 1	P55769	SNU13	-0.295031	0.0991091	-0.0979611	0.151
LLDRDACDTVR	Hsp70-binding protein 1	Q9NZL4	HSPBP1	4.05245	3.19055	3.6215	1.12262
LLECPHLNVR	Importin-4	Q8TEX9	IPO4	0.803661	0.609188	0.706424	1.06008
LLEQAEAEGCQR	Tumor necrosis factor receptor superfamily member 10D	Q9UBN6	TNFRSF10D	2.46021		2.46021
LLETPYHCEAGAATDAEATEADGADGR	Protein adenylyltransferase SelO, mitochondrial	Q9BVL4	SELENOO		1.62016	1.62016
LLGSTIPLCSAQWER	Carnitine O-palmitoyltransferase 1, liver isoform	P50416	CPT1A		0.466485	0.466485
LLHVFACACPGCSTGGAR	Programmed cell death protein 2-like	Q9BRP1	PDCD2L	-0.165163	-0.370765	-0.267964	0.632256
LLLCGGAPLSATTQR	Long-chain-fatty-acid--CoA ligase 3	O95573	ACSL3	1.26334	0.150299	0.706818	0.372004
LLLGNKCDMEAK	Ras-related protein Rab-13	P51153	RAB13	0.725879	0.619075	0.672477	1.29715
LLLPGWCHLTVEDGPR	Neurochondrin	Q9UBB6	NCDN		1.24366	1.24366
LLNWYGCVEGQQPIVR	Ubiquitin carboxyl-terminal hydrolase 4	Q13107	USP4		1.62818	1.62818
LLPCLHSACSACLGPAAPAAANSSGDGGAAGDGTVVDCPVCK	Transcription intermediary factor 1-beta	Q13263	TRIM28	1.93718	-0.769073	0.584055	0.13042
LLPDDPYEKACQK	Glutathione S-transferase omega-1	P78417	GSTO1	-0.780533	-0.563966	-0.672249	0.992802
LLQQCGPQCEGHQLFLCNVER	Transmembrane protein 246	Q9BRR3	TMEM246		0.725479	0.725479
LLRDDEAHLQEDQGEEECFHDCSASFEEEPGADKVENK	Tetratricopeptide repeat protein 1	Q99614	TTC1		1.58558	1.58558
LLSALCPEEPPVHSSAQIVSK	Translation initiation factor eIF-2B subunit gamma	Q9NR50	EIF2B3	1.2364	0.515237	0.875818	0.604434
LLTECPPMMDTEYTK	Exportin-2	P55060	CSE1L	0.406058	0.592306	0.499182	0.93028
LLTFGCNK	Serine/threonine-protein kinase Nek9	Q8TD19	NEK9	0.0933237	0.378078	0.235701	0.461001
LLVGNKCDLTTK	Ras-related protein Rab-1A	P62820	RAB1A	-0.560239	0.337552	-0.111344	0.0730318
LLYAVNTHCHADHITGSGLLR	Persulfide dioxygenase ETHE1, mitochondrial	O95571	ETHE1	1.15257	-1.04666	0.0529529	0.0135119
LNCAEYK	Uncharacterized protein CXorf38	Q8TB03	CXorf38		0.0943815	0.0943815
LNCQVIGASVDSHFCHLAWVNTPK	Peroxiredoxin-1	Q06830	PRDX1		1.46647	1.46647
LNECVDHTPK	Glutathione S-transferase omega-1	P78417	GSTO1	-0.697788	-0.893408	-0.795598	1.1086
LNILQEGHAQCLEAVR	Ankyrin repeat domain-containing protein 54	Q6NXT1	ANKRD54		1.45941	1.45941
LNISFPATGCQK	40S ribosomal protein S6	P62753	RPS6	0.379543	0.401622	0.390583	1.745
LNKCGVISPR	40S ribosomal protein S15a	P62244	RPS15A	0.0516208	0.209895	0.130758	0.460323
LNPAVTCAGK	Serine/threonine-protein kinase Nek9	Q8TD19	NEK9	0.541792	0.598225	0.570009	1.50185
LNVCSIAK	Stanniocalcin-1	P52823	STC1	3.14096		3.14096
LPADTCLLEFAR	Lysophosphatidylcholine acyltransferase 1	Q8NF37	LPCAT1		0.273557	0.273557
LPCIFICENNR	Pyruvate dehydrogenase E1 component subunit alpha, somatic form, mitochondrial	P08559	PDHA1	-0.0355522	-0.59377	-0.314661	0.335426
LPCQPLVPGPELRPSAAELK	LIM domain-containing protein 1	Q9UGP4	LIMD1		0.681661	0.681661
LPLCSLPGEPGNGPDQQLQR	Ataxin-7-like protein 3B	Q96GX2	ATXN7L3B		0.0297757	0.0297757
LPLMECVQMTK	ATP-dependent 6-phosphofructokinase, liver type	P17858	PFKL	0.146111		0.146111
LPLMECVQMTQDVQK	ATP-dependent 6-phosphofructokinase, platelet type	Q01813	PFKP	0.807149	0.476919	0.642034	0.795202
LPLVTPHTQCR	26S proteasome regulatory subunit 4	P62191	PSMC1	2.05824		2.05824
LPSLLSCDDVNMR	Interferon-related developmental regulator 1	O00458	IFRD1	1.52571	0.0939829	0.809849	0.336455
LPTASTCMNLLK	Ubiquitin-protein ligase E3C	Q15386	UBE3C	-0.459012		-0.459012
LQAAQLPHTGVFGQSFSCPSDR	Macrosialin	P34810	CD68	1.1583	0.107329	0.632812	0.355386
LQEALDAEMLEDEAGGGGAGPGGACK	Heterogeneous nuclear ribonucleoprotein U-like protein 2	Q1KMD3	HNRNPUL2	0.266191	-0.0657743	0.100208	0.184279
LQEANAQLAEQACPHDVEMTPVQR	Lethal(2) giant larvae protein homolog 1	Q15334	LLGL1	3.35059	-0.148929	1.60083	0.277137
LQEVPHEGPMCDLLWSDPDDR	Serine/threonine-protein phosphatase 2A catalytic subunit beta isoform	P62714	PPP2CB		0.234116	0.234116
LQFHDVAGDIFHQQCK	Glucose-6-phosphate 1-dehydrogenase	P11413	G6PD	-1.36253	-0.304667	-0.833597	0.443754
LQGATCNNNK	Cytoplasmic dynein 1 heavy chain 1	Q14204	DYNC1H1	-0.461746	0.364596	-0.0485754	0.0336253
LQHINPLLPACLNK	Mini-chromosome maintenance complex-binding protein	Q9BTE3	MCMBP	1.31717	0.404049	0.860609	0.507918
LQHINPLLPACLNKEESK	Mini-chromosome maintenance complex-binding protein	Q9BTE3	MCMBP		2.98402	2.98402
LQNNCTSSITR	Transmembrane protein 120A	Q9BXJ8	TMEM120A	-1.96712		-1.96712
LQSGICHLFR	Aspartate--tRNA ligase, cytoplasmic	P14868	DARS1	0.778594	2.15602	1.46731	0.553807
LQSGTHCLWTDQLLQGSEK	Metalloproteinase inhibitor 1	P01033	TIMP1	2.62727	0.759235	1.69325	0.49362
LQVEGGGCSGFQYK	Iron-sulfur cluster assembly 2 homolog, mitochondrial	Q86U28	ISCA2	1.56806	2.8433	2.20568	0.74678
LQVSVDDQCEGSTEK	Tissue factor pathway inhibitor 2	P48307	TFPI2	0.446932	0.202642	0.324787	0.640162
LREIQPCLAESR	E3 ubiquitin-protein ligase BRE1B	O75150	RNF40	0.8235	0.0459038	0.434702	0.332967
LRELSFSGIPCEGGLR	TBC1 domain family member 13	Q9NVG8	TBC1D13		0.576341	0.576341
LRENELTYYCCKK	CD59 glycoprotein	P13987	CD59		1.90442	1.90442
LRRECPSDECGAGVFMASHFDR	Ubiquitin-40S ribosomal protein S27a	P62979	RPS27A	0.725819	-0.255502	0.235158	0.145404
LRSDCESQECVTK	LanC-like protein 2	Q9NS86	LANCL2		0.794283	0.794283
LSAPGCWAACTNFSR	Proteolipid protein 2	Q04941	PLP2	0.42852		0.42852
LSCMANSVIK	Telomere-associated protein RIF1	Q5UIP0	RIF1		2.79318	2.79318
LSGCSQDCEDLK	Prolow-density lipoprotein receptor-related protein 1	Q07954	LRP1	0.54246	1.54817	1.04532	0.544475
LSKHCSQVDSVR	Src substrate cortactin	Q14247	CTTN		1.32056	1.32056
LSKPCCYIFPGGR	Microtubule-associated protein 1B	P46821	MAP1B	1.54317	0.564148	1.05366	0.557717
LSTACPGR	Exportin-2	P55060	CSE1L	-0.0898908		-0.0898908
LSTCLLSAPSGIQR	Rho guanine nucleotide exchange factor 40	Q8TER5	ARHGEF40	-1.27709	1.01904	-0.129022	0.0320992
LSTSQDAACKDAEECPETAEAK	Serine/threonine-protein phosphatase 6 regulatory subunit 3	Q5H9R7	PPP6R3	-0.323703	1.51889	0.597595	0.198133
LTALDYHNPAGFNCKDETEFR	RNA transcription, translation and transport factor protein	Q9Y224	RTRAF	-1.313	-0.122243	-0.717623	0.35566
LTAVCMECFR	Thymidine kinase, cytosolic	P04183	TK1		1.19583	1.19583
LTCPCCNTR	E3 ubiquitin-protein ligase BRE1B	O75150	RNF40		-0.136151	-0.136151
LTDFGLCK	Ribosomal protein S6 kinase beta-1	P23443	RPS6KB1		1.23008	1.23008
LTEGCSFR	40S ribosomal protein S27	P42677	RPS27	0.354623	0.333511	0.344067	1.70941
LTFSCLGGSDNFK	Prostaglandin E synthase 3	Q15185	PTGES3		0.304196	0.304196
LTGAGGGGCGITLLKPGLEQPEVEATK	Mevalonate kinase	Q03426	MVK	1.14177	-0.778777	0.181497	0.0549855
LTGIKHELQANCYEEVKDR	Cofilin-1	P23528	CFL1	-0.467957	0.209872	-0.129042	0.114415
LTHAAPCMLFMK	Glutaredoxin-3	O76003	GLRX3	-0.354254	-0.119276	-0.236765	0.532774
LTLSCEEFVK	Persulfide dioxygenase ETHE1, mitochondrial	O95571	ETHE1	-0.0574128	0.303082	0.122835	0.208181
LVDWLLAQGDCQTR	Phosphatidylinositol 3,4,5-trisphosphate-dependent Rac exchanger 1 protein	Q8TCU6	PREX1		3.26069	3.26069
LVEALCAAGHR	Thymidylate kinase	P23919	DTYMK		1.20971	1.20971
LVEALCAEHQINLIK	40S ribosomal protein S12	P25398	RPS12	-0.587216	-0.639437	-0.613326	1.56726
LVFLACCVAPTNPR	DNA replication licensing factor MCM6	Q14566	MCM6	-0.111037	0.044777	-0.0331301	0.128412
LVHDMNHPPSGEYFGQCGGCGEDVVGDGAGVVALDR	Thyroid receptor-interacting protein 6	Q15654	TRIP6	2.38418		2.38418
LVILANNCPALR	60S ribosomal protein L30	P62888	RPL30	0.073722	-0.114065	-0.0201713	0.0628428
LVIPASQCGSLIGK	Poly(rC)-binding protein 4	P57723	PCBP4	2.43793	0.869544	1.65374	0.549921
LVIVGDGACGK	Transforming protein RhoA	P61586	RHOA	0.528896	-0.0875858	0.220655	0.21862
LVIYGGMSGCR	Host cell factor 1	P51610	HCFC1		-1.14186	-1.14186
LVNKCALDFFR	NADH dehydrogenase [ubiquinone] 1 alpha subcomplex subunit 8	P51970	NDUFA8	0.359054	0.472258	0.415656	1.06468
LVPCILEAAK	Protein SAAL1	Q96ER3	SAAL1	-0.165219		-0.165219
LVQAFQFTDKHGEVCPAGWKPGSDTIKPDVQK	Peroxiredoxin-1	Q06830	PRDX1	2.24004	1.6603	1.95017	1.02715
LVTVWSAPNYCYR	Serine/threonine-protein phosphatase 6 catalytic subunit	O00743	PPP6C	2.0558	0.511459	1.28363	0.462474
LVVPASQCGSLIGK	Poly(rC)-binding protein 2	Q15366	PCBP2	0.595085	0.707158	0.651121	1.26238
LVVPASQCGSLIGKGGCK	Poly(rC)-binding protein 2	Q15366	PCBP2		0.628561	0.628561
LVVPATQCGSLIGK	Poly(rC)-binding protein 1	Q15365	PCBP1	-0.132361	-0.0797813	-0.106071	0.810591
LVVPATQCGSLIGKGGCK	Poly(rC)-binding protein 1	Q15365	PCBP1	0.490845	0.884551	0.687698	0.750837
LVVVLCNLKPQK	Tyrosine--tRNA ligase, cytoplasmic	P54577	YARS1		-0.699841	-0.699841
LWADHGVQACFGR	Guanine nucleotide-binding protein G(i) subunit alpha-2	P04899	GNAI2	0.506606	0.0698911	0.288249	0.384341
LWNEWCR	Proteasome assembly chaperone 1	O95456	PSMG1	0.364366	0.454272	0.409319	1.15716
LWNTLGVCK	Receptor of activated protein C kinase 1	P63244	RACK1	0.443622	-0.199687	0.121967	0.113924
LWSSLQTHCCSQNK	Lysosomal protective protein	P10619	CTSA	1.09814	1.59654	1.34734	0.93393
LYYFQYPCYQEGLR	DNA dC->dU-editing enzyme APOBEC-3C	Q9NRW3	APOBEC3C		0.661361	0.661361
MACGLGGK	Importin-5	O00410	IPO5	0.242632	0.253752	0.248192	1.8459
MADCGGLPQVVQPGK	Protein NDRG3	Q9UGV2	NDRG3	-0.395457	0.219449	-0.0880043	0.0848527
MAPDHEKACIACR	DnaJ homolog subfamily C member 7	Q99615	DNAJC7		2.48368	2.48368
MCDNCCKDSAFER	ATP-dependent DNA helicase Q1	P46063	RECQL		-0.94807	-0.94807
MDPNCSCAAGDSCTCAGSCK	Metallothionein-2	P02795	MT2A	-0.190914	0.301868	0.055477	0.0660012
MDPNCSCSPVGSCACAGSCK	Metallothionein-1X	P80297	MT1X	-1.58169		-1.58169
MDRTCEERPAEDGSDEEDPDSMEAPTR	WD repeat-containing protein 55	Q9H6Y2	WDR55		0.0569863	0.0569863
MEEELQHSHCVNCVSR	F-box only protein 30	Q8TB52	FBXO30	1.02746	0.25775	0.642603	0.464041
MEEVPHDCPGADSAQAGR	Cytosolic Fe-S cluster assembly factor NUBP1	P53384	NUBP1		-0.400335	-0.400335
MEGSEPVAAHQGEEASCSSWGTGSTNK	Ubiquitin-like modifier-activating enzyme 6	A0AVT1	UBA6	-0.123939		-0.123939
MEIEVSVAECK	A-kinase anchor protein 2	Q9Y2D5	AKAP2		0.333545	0.333545
MEPCYTK	Protein Niban 1	Q9BZQ8	NIBAN1	0.38672		0.38672
MEPLNNVCAK	Chloride channel CLIC-like protein 1	Q96S66	CLCC1	0.103793	-0.0754136	0.0141898	0.045751
MEPVGCCGECR	F-box only protein 22	Q8NEZ5	FBXO22	0.013279	1.56246	0.78787	0.305755
MEVDYSATVDQRLPECAK	26S proteasome non-ATPase regulatory subunit 12	O00232	PSMD12	0.606917		0.606917
MIEVVCNDR	Ubiquitin-like protein 5	Q9BZL1	UBL5	1.16211		1.16211
MKGCPVNTEPSGPTCEK	Cytochrome c-type heme lyase	P53701	HCCS	0.278176	0.963485	0.620831	0.493411
MKLNISFPATGCQK	40S ribosomal protein S6	P62753	RPS6	1.19721	0.578324	0.887768	0.670563
MKVELCSFSGYK	60S ribosomal protein L24	P83731	RPL24	-0.69055		-0.69055
MLGETCADCGTILLQDK	Protein ZNRD2	O60232	ZNRD2	-0.255786	-0.497859	-0.376823	0.703648
MLNYSAPSAGGCLLDRK	mRNA decay activator protein ZFP36L1	Q07352	ZFP36L1	-0.411377	1.00518	0.296903	0.126504
MLPDKDCR	Cofilin-1	P23528	CFL1	-0.518391	-0.31054	-0.414466	0.805749
MLSCAGADR	60S ribosomal protein L10	P27635	RPL10	0.321911	0.980902	0.651406	0.525601
MLSSGVCTSTVQLPGK	Retinol dehydrogenase 11	Q8TC12	RDH11	0.546894	0.454424	0.500659	1.23192
MLVQCMQDQEHPSIR	Importin-5	O00410	IPO5		2.25468	2.25468
MMCGAPSATQPATAETQHIADQVR	Cystatin-B	P04080	CSTB	2.6363	0.728962	1.68263	0.483782
MMPECQCPPHMTGPR	Prolow-density lipoprotein receptor-related protein 1	Q07954	LRP1	0.466648	0.632114	0.549381	1.02157
MMQICDTYNQK	Mid1-interacting protein 1	Q9NPA3	MID1IP1		0.857351	0.857351
MPCQLHQVIVAR	Calpain-2 catalytic subunit	P17655	CAPN2	-1.79285	-0.328116	-1.06048	0.414804
MPCQSLQPEPINTPTHTK	Proliferation marker protein Ki-67	P46013	MKI67		-0.463244	-0.463244
MREIVHIQAGQCGNQIGTK	Tubulin beta-6 chain	Q9BUF5	TUBB6	0.770596	-1.07558	-0.152492	0.047802
MREIVHLQAGQCGNQIGAK	Tubulin beta-4B chain	P68371	TUBB4B	0.440786	0.530187	0.485487	1.23321
MRPGVACSVSQAQK	60S ribosomal protein L9	P32969	RPL9	-0.421005		-0.421005
MVALCTCK	CDGSH iron-sulfur domain-containing protein 3, mitochondrial	P0C7P0	CISD3	0.369968		0.369968
MVEFLQCTVPCR	60S ribosomal export protein NMD3	Q96D46	NMD3	-0.564604	-1.16053	-0.862568	0.674191
MVGCTGK	Protein-L-isoaspartate(D-aspartate) O-methyltransferase	P22061	PCMT1		0.932465	0.932465
MVILLCNLKPAK	Aminoacyl tRNA synthase complex-interacting multifunctional protein 1	Q12904	AIMP1	-2.06304		-2.06304
NACIECSVNQNSIR	Ataxin-10	Q9UBB4	ATXN10		-0.694247	-0.694247
NADCSSGPGQR	Cancer-related nucleoside-triphosphatase	Q9BSD7	NTPCR	0.952711	1.81164	1.38217	0.71718
NADMSEEMQQDSVECATQALEK	Dynein light chain 1, cytoplasmic	P63167	DYNLL1	0.178713	0.173131	0.175922	1.99577
NALANPLYCPDYR	Cytochrome b-c1 complex subunit 2, mitochondrial	P22695	UQCRC2	0.035102	0.304665	0.169884	0.369599
NALANQSDCVLHR	Anaphase-promoting complex subunit 7	Q9UJX3	ANAPC7		-0.566717	-0.566717
NALVSHLDGTTPVCEDIGR	Cytochrome b-c1 complex subunit 1, mitochondrial	P31930	UQCRC1	1.14645	-1.08073	0.0328574	0.00823297
NAQLDCSKLETLGIGQR	Methionine adenosyltransferase 2 subunit beta	Q9NZL9	MAT2B	-0.301555		-0.301555
NARPSICPNSGFMEQLR	Dual specificity protein phosphatase 19	Q8WTR2	DUSP19	0.106711	-1.34342	-0.618356	0.259273
NASCGTR	Protein transport protein Sec61 subunit beta	P60468	SEC61B	0.600401		0.600401
NAVWALSNLCR	Importin subunit alpha-7	O60684	KPNA6		0.922332	0.922332
NAWADNANACAK	Phosphatidylinositide phosphatase SAC1	Q9NTJ5	SACM1L	1.48217		1.48217
NCGCLGASPNLEQLQEENLK	Arginine--tRNA ligase, cytoplasmic	P54136	RARS1	2.19853	-1.45448	0.372027	0.0594428
NCIVLIDSTPYR	40S ribosomal protein S8	P62241	RPS8	0.601392	0.608172	0.604782	2.44752
NCLEESEGCYCR	Serine/threonine-protein kinase RIO2	Q9BVS4	RIOK2	-0.468977		-0.468977
NCLNPQFSK	Copine-3	O75131	CPNE3	0.348247	-1.08179	-0.366772	0.155977
NCLTNFHGMDLTR	40S ribosomal protein S3a	P61247	RPS3A	0.167442	0.477795	0.322618	0.544527
NCMTDLLAK	Receptor expression-enhancing protein 5	Q00765	REEP5	2.84517		2.84517
NCPHVVVGTPGR	ATP-dependent RNA helicase DDX39A	O00148	DDX39A	0.892656	0.733817	0.813237	1.20779
NCSSFLIK	60S ribosomal protein L28	P46779	RPL28	-1.62456	-0.514654	-1.06961	0.516143
NCSSFLIKR	60S ribosomal protein L28	P46779	RPL28	0.542659	0.0867351	0.314697	0.398918
NCSSPEFSK	Copine-1	Q99829	CPNE1	0.622606	0.631589	0.627097	2.34109
NCTAGAVYTYHEK	Nitric oxide synthase-interacting protein	Q9Y314	NOSIP	-0.735711	-0.59885	-0.66728	1.18669
NCTCGLAEELEKEK	Anamorsin	Q6FI81	CIAPIN1	-0.0831046	-0.176503	-0.129804	0.657861
NCWQNYLDFHR	Cytochrome c oxidase subunit 6B1	P14854	COX6B1	0.581515	0.76806	0.674787	1.05828
NDPYHPDHFNCANCGK	LIM and senescent cell antigen-like-containing domain protein 1	P48059	LIMS1	-0.2528	-0.312977	-0.282889	1.17097
NEAIQAAHDAVAQEGQCR	Ubiquitin carboxyl-terminal hydrolase isozyme L1	P09936	UCHL1	-0.0859889	-0.233843	-0.159916	0.559608
NEDFAAHPGEDAVPTGPDCQAK	A-kinase anchor protein 12	Q02952	AKAP12	0.426847	0.753055	0.589951	0.765186
NFASCMGDSR	Influenza virus NS1A-binding protein	Q9Y6Y0	IVNS1ABP		-0.509342	-0.509342
NFILDQCNVYNSGQR	Heterogeneous nuclear ribonucleoprotein U-like protein 2	Q1KMD3	HNRNPUL2		-0.362398	-0.362398
NGDICETSGKPK	Survival motor neuron protein	Q16637	SMN1	1.05398		1.05398
NHCGIASAASYPTV	Cathepsin L1	P07711	CTSL		1.03936	1.03936
NHEAGTSGCGIDAK	Centrosomal protein of 170 kDa	Q5SW79	CEP170	1.33261	0.906076	1.11934	0.921331
NHIENQDECVLNVISHAR	39S ribosomal protein L37, mitochondrial	Q9BZE1	MRPL37		0.211367	0.211367
NHLLPDIVTCVQSSR	Cancer-related nucleoside-triphosphatase	Q9BSD7	NTPCR	0.082457	0.581248	0.331852	0.386913
NHSGGGGGGGSGGSGGGGGSGGGGAPSGGSGHSGGPSSCGGAPSTSR	Triple functional domain protein	O75962	TRIO	-0.434596	1.05372	0.30956	0.125497
NIDCYSTDFCVR	Lysophospholipid acyltransferase 7	Q96N66	MBOAT7		-3.82591	-3.82591
NILDSKPTANKKCDLISIPK	Coronin-1C	Q9ULV4	CORO1C	0.243445		0.243445
NILGGTVFREPIICK	Isocitrate dehydrogenase [NADP], mitochondrial	P48735	IDH2		-0.0891174	-0.0891174
NINCSIEESFQR	Hydroxymethylglutaryl-CoA lyase, mitochondrial	P35914	HMGCL	5.0137	-0.022078	2.49581	0.298602
NINDAWVCTNDMFR	Nuclear transport factor 2	P61970	NUTF2		0.485868	0.485868
NITWTLSNLCR	Importin subunit alpha-8	A9QM74	KPNA7		-5.65344	-5.65344
NLEAVETLGSTSTICSDKTGTLTQNR	Sodium/potassium-transporting ATPase subunit alpha-1	P05023	ATP1A1	0.804797	0.321481	0.563139	0.588278
NLFEDQNTLTSICEK	Exportin-2	P55060	CSE1L	0.466223	-0.0863992	0.189912	0.209959
NLSGQPNFPCR	Transmembrane 9 superfamily member 3	Q9HD45	TM9SF3	0.245855	0.833472	0.539663	0.498406
NLVQCGDFPHLLVYGPSGAGK	Replication factor C subunit 3	P40938	RFC3		-0.220816	-0.220816
NLVQCGDFPHLLVYGPSGAGKK	Replication factor C subunit 3	P40938	RFC3	1.46418	1.10223	1.28321	1.04966
NMACVQR	Transgelin-2	P37802	TAGLN2	-0.858908		-0.858908
NMMAACDPR	Tubulin beta-4B chain	P68371	TUBB4B	0.519559	0.255058	0.387309	0.678863
NMSVHLSPCFR	40S ribosomal protein S11	P62280	RPS11	0.139747	0.287246	0.213496	0.674194
NMVHPNVICDGCNGPVVGTR	Sequestosome-1	Q13501	SQSTM1	-1.81253	-0.0715584	-0.942044	0.323417
NNASPFDAPCR	Transmembrane 9 superfamily member 1	O15321	TM9SF1	1.76805		1.76805
NNLKDCGLF	Guanine nucleotide-binding protein G(i) subunit alpha-2	P04899	GNAI2	0.220801	0.179021	0.199911	1.17859
NNLKECGLY	Guanine nucleotide-binding protein G(i) subunit alpha	P08754	GNAI3	0.584162	0.247943	0.416053	0.611789
NPGYPQSEGLLGECMIR	Endophilin-A2	Q99961	SH3GL1		0.85064	0.85064
NPMDYPVEDAFCKPQLVK	Retinoic acid-induced protein 3	Q8NFJ5	GPRC5A	2.20017		2.20017
NPVCANR	DNA replication licensing factor MCM6	Q14566	MCM6		-0.0365842	-0.0365842
NPVHCFDLASLDPR	Ribosomal RNA-processing protein 8	O43159	RRP8	-1.33625		-1.33625
NPVQCYEK	THO complex subunit 1	Q96FV9	THOC1		-1.68856	-1.68856
NQDDFECVTTLEGHENEVK	Probable cytosolic iron-sulfur protein assembly protein CIAO1	O76071	CIAO1	-0.464765	-0.507732	-0.486249	1.55115
NQSFCPTVNLDK	60S ribosomal protein L27a	P46776	RPL27A	0.284845	0.194964	0.239904	0.928526
NQVDSETHCHAER	DNA dC->dU-editing enzyme APOBEC-3C	Q9NRW3	APOBEC3C	0.519087	0.59428	0.556684	1.36724
NRIENRFPDEATCMGFCAPK	Tissue factor pathway inhibitor 2	P48307	TFPI2	0.82743	0.548921	0.688175	0.895835
NSLVDKPFAAKEDQLLCTDCYSNEYSSK	Four and a half LIM domains protein 2	Q14192	FHL2	-0.788812	-0.658274	-0.723543	1.24205
NSNVDSSYLESLYQSCPR	Zinc finger CCCH-type antiviral protein 1	Q7Z2W4	ZC3HAV1	0.519008	0.375107	0.447057	0.993156
NSPEDLGLSLTGDSCK	TP53-binding protein 1	Q12888	TP53BP1		-2.97505	-2.97505
NSPSLFPCAPLCER	ERBB receptor feedback inhibitor 1	Q9UJM3	ERRFI1	0.330799	0.0881681	0.209484	0.476024
NTGIICTIGPASR	Pyruvate kinase PKM	P14618	PKM	-0.469082	-0.975412	-0.722247	0.668307
NTGSCQEAAAK	Serine palmitoyltransferase 2	O15270	SPTLC2	0.573551	-1.54643	-0.48644	0.139002
NTLANSCGTGIR	Nucleus accumbens-associated protein 1	Q96RE7	NACC1	0.589694	-0.111454	0.23912	0.208365
NTPLCDSFVFR	Long-chain-fatty-acid--CoA ligase 3	O95573	ACSL3		-0.434419	-0.434419
NTPSEPIHCIVWAK	SUMO-activating enzyme subunit 2	Q9UBT2	UBA2	-0.218172	0.195082	-0.0115451	0.0157129
NTWDCGLQILKK	Tricarboxylate transport protein, mitochondrial	P53007	SLC25A1	0.921018		0.921018
NVGTGLVGAPACGDVMK	Iron-sulfur cluster assembly enzyme ISCU, mitochondrial	Q9H1K1	ISCU	0.0990331		0.0990331
NVIETCK	Sterol-4-alpha-carboxylate 3-dehydrogenase, decarboxylating	Q15738	NSDHL	-0.302395		-0.302395
NVIETCKEAGVQK	Sterol-4-alpha-carboxylate 3-dehydrogenase, decarboxylating	Q15738	NSDHL		1.0719	1.0719
NVPHEDICEDSDIDGDYR	Importin subunit alpha-3	O00629	KPNA4		0.638994	0.638994
NVVTIFSAPNYCYR	Serine/threonine-protein phosphatase 2A catalytic subunit beta isoform	P62714	PPP2CB		0.72698	0.72698
NYLEPGKECVQPATK	Sarcoplasmic/endoplasmic reticulum calcium ATPase 2	P16615	ATP2A2	0.197417	0.917467	0.557442	0.437621
NYLSCDVEVR	Glycerol-3-phosphate dehydrogenase, mitochondrial	P43304	GPD2	3.08783		3.08783
PEEGSGCSVR	CD70 antigen	P32970	CD70	1.94956		1.94956
PKHEFSVDMTCGGCAEAVSR	Copper transport protein ATOX1	O00244	ATOX1	0.881195		0.881195
PVAVGPYGQSQPSCFDR	Reactive oxygen species modulator 1	P60602	ROMO1		3.91706	3.91706
QAAECGPEPGVSGVGELIVR	Retinol dehydrogenase 14	Q9HBH5	RDH14	0.533835		0.533835
QAHLCVLASNCDEPMYVK	40S ribosomal protein S12	P25398	RPS12	-2.95777	-0.292351	-1.62506	0.359241
QATVVLNCVGPYR	Saccharopine dehydrogenase-like oxidoreductase	Q8NBX0	SCCPDH		-0.803542	-0.803542
QCLECGLFTCK	Melanophilin	Q9BV36	MLPH		2.03011	2.03011
QCVPFR	60S ribosomal protein L17	P18621	RPL17	1.26052		1.26052
QDLADVVQVCEGK	Cytoplasmic dynein 1 heavy chain 1	Q14204	DYNC1H1	-0.13945		-0.13945
QDVDLCLVSSCEYKHPK	Microtubule-associated protein 1B	P46821	MAP1B	0.0285917	0.369107	0.198849	0.346031
QEYDESGPSIVHRKCF	Actin, cytoplasmic 1	P60709	ACTB	2.18624	0.784672	1.48545	0.551874
QFLECAQNQGDIK	Putative coiled-coil-helix-coiled-coil-helix domain-containing protein CHCHD2P9, mitochondrial	Q5T1J5	CHCHD2P9	-1.58055	2.20892	0.314186	0.0479891
QFNYTHICAGASAFGK	Electron transfer flavoprotein subunit alpha, mitochondrial	P13804	ETFA	0.14089	-0.160633	-0.00987119	0.0184639
QGCPFQPWDGLEEHSQALSGR	DNA dC->dU-editing enzyme APOBEC-3B	Q9UH17	APOBEC3B		0.244968	0.244968
QGFGNLPICMAK	C-1-tetrahydrofolate synthase, cytoplasmic	P11586	MTHFD1	-0.257336	0.119816	-0.0687603	0.109351
QGRPIILCSKDDTESSK	Glutamine--fructose-6-phosphate aminotransferase [isomerizing] 2	O94808	GFPT2	-5.1499	-0.0190019	-2.58445	0.303075
QHAMQCVQCK	Four and a half LIM domains protein 2	Q14192	FHL2	8.53246		8.53246
QICSCDGLTIWEER	Copper chaperone for superoxide dismutase	O14618	CCS	-0.231994	-0.349033	-0.290514	0.897759
QITQVYGFYDECLRK	Serine/threonine-protein phosphatase 2A catalytic subunit beta isoform	P62714	PPP2CB	0.457708		0.457708
QITSYGETCPGLEQYAIKK	T-complex protein 1 subunit theta	P50990	CCT8		-1.12688	-1.12688
QKFDNLYCCR	S-adenosylhomocysteine hydrolase-like protein 1	O43865	AHCYL1		-0.934577	-0.934577
QLCCCSVGK	Latent-transforming growth factor beta-binding protein 1	Q14766	LTBP1	1.86132		1.86132
QLCDNAGFDATNILNK	T-complex protein 1 subunit eta	Q99832	CCT7	-1.82522		-1.82522
QLVTNACLIK	Protein arginine N-methyltransferase 1	Q99873	PRMT1	-0.0363423	0.243506	0.103582	0.225982
QMEKDETVSDCSPHIANIGR	F-actin-capping protein subunit beta	P47756	CAPZB	-0.0917132	1.08688	0.497582	0.25681
QMSCLMEALEDKR	Golgi apparatus protein 1	Q92896	GLG1	-1.27646		-1.27646
QNPFPPLSTVC	PCI domain-containing protein 2	Q5JVF3	PCID2		-0.231798	-0.231798
QNSVQEQPGTACLSK	Anillin	Q9NQW6	ANLN		1.40054	1.40054
QNVAVNELCGR	Zyxin	Q15942	ZYX		0.904195	0.904195
QPAIMPGQSYGLEDGSCSYKDFSESR	Heterogeneous nuclear ribonucleoprotein L	P14866	HNRNPL	2.59612	0.10684	1.35148	0.324391
QPERLCSGPGIVGNVLVDPSAR	Mannose-1-phosphate guanyltransferase beta	Q9Y5P6	GMPPB	-0.328596	1.41939	0.545396	0.190555
QPEVTNPCDR	Prolow-density lipoprotein receptor-related protein 1	Q07954	LRP1	-0.694528	-0.0524457	-0.373487	0.344844
QQICNQQPPCSR	Zinc finger CCCH-type antiviral protein 1	Q7Z2W4	ZC3HAV1		-1.23705	-1.23705
QQSFCAKPPPSPLSPVPSVVK	Ras-associated and pleckstrin homology domains-containing protein 1	Q70E73	RAPH1	0.387676		0.387676
QRPASLVVADFGCGDCR	Ribosomal RNA-processing protein 8	O43159	RRP8	-0.66227		-0.66227
QSCYLCDLPR	Probable E3 ubiquitin-protein ligase IRF2BPL	Q9H1B7	IRF2BPL	-0.446382		-0.446382
QSLLFCPK	OCIA domain-containing protein 2	Q56VL3	OCIAD2	0.364609	0.345974	0.355292	1.77749
QSNLTNGDCVASSDGTSKPSSSLAVAAQLR	F-box only protein 30	Q8TB52	FBXO30		-0.0271634	-0.0271634
QTSQCLK	Leucine--tRNA ligase, cytoplasmic	Q9P2J5	LARS1	1.26786		1.26786
QVDVVITCTGNK	S-adenosylhomocysteine hydrolase-like protein 1	O43865	AHCYL1	0.536306	-0.666155	-0.0649246	0.0308082
QVHQCIER	Protein FAM136A	Q96C01	FAM136A		0.0884426	0.0884426
QVLDYPSPDVECAKK	SLAIN motif-containing protein 2	Q9P270	SLAIN2	3.01662		3.01662
QVLIRPCSK	40S ribosomal protein S15a	P62244	RPS15A	0.248955	0.348595	0.298775	0.978038
QVLVAPGNAGTACSEK	Trifunctional purine biosynthetic protein adenosine-3	P22102	GART	0.628484	1.55	1.08924	0.593862
QVVDCQLADVNNIGK	Cytosol aminopeptidase	P28838	LAP3	-6.03999	-4.53474	-5.28736	1.04569
QWCNCAFLESSAK	Ras-related protein Rap-1A	P62834	RAP1A		-0.0253924	-0.0253924
QWNNCAFLESSAK	Ras-related protein Rap-1b	P61224	RAP1B	0.673341	0.284755	0.479048	0.610312
QYGFCK	Alpha-2-HS-glycoprotein	P02765	AHSG		0.597522	0.597522
QYLPGNEQGVACSGSDPSWK	Probable cytosolic iron-sulfur protein assembly protein CIAO1	O76071	CIAO1	0.130205	-0.241827	-0.0558109	0.0891441
RAACQEAQVFGNQLIPPNAQVK	Acylglycerol kinase, mitochondrial	Q53H12	AGK	1.98031		1.98031
RAAQLCGAGMAAVVDR	Hexokinase-2	P52789	HK2		-0.599252	-0.599252
RACAAGTPAVIR	Host cell factor 1	P51610	HCFC1	-3.77998	-1.95022	-2.8651	0.706043
RACYGVLR	40S ribosomal protein S3	P23396	RPS3	0.79192	0.250848	0.521384	0.516114
RAPTCSLDGALPLGAQIPAVHR	FH1/FH2 domain-containing protein 1	Q9Y613	FHOD1	0.469557	0.542356	0.505957	1.33988
RAYCEGCYVATLEK	Thyroid receptor-interacting protein 6	Q15654	TRIP6	-0.801246	-1.7593	-1.28027	0.642196
RECPSDECGAGVFMASHFDR	Ubiquitin-40S ribosomal protein S27a	P62979	RPS27A	0.286771	0.335027	0.310899	1.30709
REDCLPYAATVLR	Tubulin-specific chaperone D	Q9BTW9	TBCD	1.38212		1.38212
RFSFCCSPEPEAEAEAAAGPGPCER	Sequestosome-1	Q13501	SQSTM1	0.442695	0.264579	0.353637	0.803942
RGCLEGSQGTQALHK	Nuclear receptor 2C2-associated protein	Q86WQ0	NR2C2AP		-0.362089	-0.362089
RGPCIIYNEDNGIIK	60S ribosomal protein L4	P36578	RPL4	0.731945	0.682521	0.707233	1.65295
RLCLQSIAFISR	Transmembrane protein 33	P57088	TMEM33	0.23377	0.992004	0.612887	0.452637
RLCPDISFFQR	TBC1 domain family member 13	Q9NVG8	TBC1D13	1.4816	-1.17505	0.153271	0.032983
RLDSSACLHAVGDK	Glutamine--fructose-6-phosphate aminotransferase [isomerizing] 2	O94808	GFPT2	0.52221	0.61871	0.57046	1.26988
RLIPDGCGVK	60S ribosomal protein L10	P27635	RPL10	0.516545	1.13903	0.827786	0.640251
RLWADHGVQACFGR	Guanine nucleotide-binding protein G(i) subunit alpha-2	P04899	GNAI2	0.571818	-0.0636086	0.254105	0.243724
RNPYCR	Transmembrane protein 33	P57088	TMEM33		0.552879	0.552879
RPCPFWNDISQCGR	ERO1-like protein alpha	Q96HE7	ERO1A	-3.94326	-2.12859	-3.03592	0.733097
RPCTLSELE	Prolyl 4-hydroxylase subunit alpha-1	P13674	P4HA1	1.70805		1.70805
RPIVACELGR	Replication termination factor 2	Q9BY42	RTF2	-0.434439		-0.434439
RPTEICADPQFIIGGATR	Calpain-2 catalytic subunit	P17655	CAPN2	-0.683904	0.0600788	-0.311913	0.255096
RPVFPPLCGDGLLSGKEETR	RNA-binding protein PNO1	Q9NRX1	PNO1	0.730793		0.730793
RQCLECGLFTCK	Melanophilin	Q9BV36	MLPH	0.224124		0.224124
RSIQFVDWCPTGFK	Tubulin alpha-4A chain	P68366	TUBA4A	0.55933	0.371106	0.465218	0.895954
RTIQFVDWCPTGFK	Tubulin alpha-1C chain	Q9BQE3	TUBA1C		-0.507468	-0.507468
RTPLQHEAPLWMDQLCTGCMK	5'-nucleotidase domain-containing protein 2	Q9H857	NT5DC2		0.149034	0.149034
RYPNVFGIGDCTNLPTSK	Sulfide:quinone oxidoreductase, mitochondrial	Q9Y6N5	SQOR	-0.036784	0.790187	0.376702	0.276041
SACGNCYLGDAFR	Anamorsin	Q6FI81	CIAPIN1	0.876234	0.256678	0.566456	0.49677
SACGVCPGR	60S ribosomal protein L34	P49207	RPL34	-0.104401	-0.142199	-0.1233	1.01401
SADLQTNGCVTTARPVPK	Arsenite methyltransferase	Q9HBK9	AS3MT		0.64587	0.64587
SAGACTAAAFLK	Cytosol aminopeptidase	P28838	LAP3	0.820694	0.354462	0.587578	0.61898
SAGGPCPAAAGGGPGGASCSVGAPGGVSMFR	Golgi-associated PDZ and coiled-coil motif-containing protein	Q9HD26	GOPC		2.61811	2.61811
SAGVQCFGPTAEAAQLESSKR	Trifunctional purine biosynthetic protein adenosine-3	P22102	GART	1.42871	0.412883	0.920797	0.493626
SAPCGSLAFSGDR	Microtubule-associated protein 1A	P78559	MAP1A	0.560721	5.66752	3.11412	0.3593
SAPMNGHCFAENGPSQK	ERBB receptor feedback inhibitor 1	Q9UJM3	ERRFI1		0.219893	0.219893
SASASPLTPCSVTR	MAP7 domain-containing protein 1	Q3KQU3	MAP7D1	0.152043	0.152892	0.152467	2.75188
SASLDNGGCALTTFSVLEGEKNNHR	Sterol O-acyltransferase 1	P35610	SOAT1		0.668808	0.668808
SAYGFHTASSCFWDTTSDGTCTVR	Dynein light chain Tctex-type 3	P51808	DYNLT3	0.179995		0.179995
SCCSCCPVGCAK	Metallothionein-2	P02795	MT2A	-0.182745	0.403344	0.110299	0.113045
SCCTSVNEVICHGIPDR	Methionine aminopeptidase 1	P53582	METAP1		0.28117	0.28117
SCEGQNPELLPK	Anillin	Q9NQW6	ANLN	1.1681	4.14421	2.65615	0.487986
SCENLAPFNTALK	Aminoacyl tRNA synthase complex-interacting multifunctional protein 2	Q13155	AIMP2	-0.28673	0.0218834	-0.132423	0.260829
SCFESSPDPELK	Serine/arginine repetitive matrix protein 2	Q9UQ35	SRRM2		0.0340987	0.0340987
SCFLCMVCK	Cysteine and glycine-rich protein 1	P21291	CSRP1	-2.00271		-2.00271
SCFLCMVCKK	Cysteine and glycine-rich protein 1	P21291	CSRP1		-0.329322	-0.329322
SCGHQTSASSLK	Ras-related GTP-binding protein C	Q9HB90	RRAGC	0.659128	2.67835	1.66874	0.460443
SCGKDGFHIR	60S ribosomal protein L10	P27635	RPL10	2.13403	0.24542	1.18972	0.369464
SCKPKPIGK	C-1-tetrahydrofolate synthase, cytoplasmic	P11586	MTHFD1		0.368584	0.368584
SCLLHQFTEK	Ras-related protein Rab-14	P61106	RAB14	0.074543	0.380345	0.227444	0.423898
SCLLLR	Ras-related protein Rab-1A	P62820	RAB1A		0.740872	0.740872
SCMCTAGYSLR	Prolow-density lipoprotein receptor-related protein 1	Q07954	LRP1	1.97115		1.97115
SCPFADVAPLQLK	Apoptosis regulatory protein Siva	O15304	SIVA1		-0.263679	-0.263679
SCPSFSASSEGTR	Deoxycytidine kinase	P27707	DCK	2.91149	1.02576	1.96863	0.54614
SCPVVQSSQHLFLDLPK	Methionine--tRNA ligase, cytoplasmic	P56192	MARS1		0.273995	0.273995
SCQFVAVR	Bifunctional glutamate/proline--tRNA ligase	P07814	EPRS1	3.64338		3.64338
SCSGVEFSTSGHAYTDTGK	Voltage-dependent anion-selective channel protein 3	Q9Y277	VDAC3	1.0654	1.8402	1.4528	0.780159
SCSGVEFSTSGSSNTDTGK	Voltage-dependent anion-selective channel protein 2	P45880	VDAC2	0.474539	0.566561	0.52055	1.25085
SCSGVEFSTSGSSNTDTGKVTGTLETK	Voltage-dependent anion-selective channel protein 2	P45880	VDAC2	0.583615	0.566429	0.575022	2.02171
SCSIDRSPGAGSLGSPASQR	LIM domain kinase 1	P53667	LIMK1	3.94449		3.94449
SCSLGSLGALGPACCR	RISC-loading complex subunit TARBP2	Q15633	TARBP2		-1.31308	-1.31308
SCSLVLEHQPDNIK	Peptidyl-prolyl cis-trans isomerase FKBP8	Q14318	FKBP8	3.91024	0.416524	2.16338	0.364073
SCSMNQLSSGIPVPKPR	Stromal interaction molecule 2	Q9P246	STIM2		1.83393	1.83393
SCSPELQQK	Carbonyl reductase [NADPH] 1	P16152	CBR1		0.863276	0.863276
SCTTESCDFVR	Carnitine O-palmitoyltransferase 1, liver isoform	P50416	CPT1A	0.448004	0.34572	0.396862	1.08837
SCVEEPEPEPEAAEGDGDKK	Hepatoma-derived growth factor	P51858	HDGF	-0.296145	-0.0776311	-0.186888	0.472641
SCYDLSCHAR	Glycine--tRNA ligase	P41250	GARS1	0.257252	0.771524	0.514388	0.530017
SDDAGDTLATGDKAEVTEMPNSDSLPEDAEVHCDSAAVSHEPTPADPR	Protein NOXP20	Q8IWE2	FAM114A1		2.15138	2.15138
SDEVDEQVACQEVK	A-kinase anchor protein 12	Q02952	AKAP12		0.912533	0.912533
SDFGSCPPEEQPR	Esterase OVCA2	Q8WZ82	OVCA2		-1.27073	-1.27073
SDLGPCEK	Luc7-like protein 3	O95232	LUC7L3	0.47659		0.47659
SDLGPCEKIHDENLR	Luc7-like protein 3	O95232	LUC7L3	-0.652954		-0.652954
SDPYHATSGALSPAKDCGSQK	Gap junction alpha-1 protein	P17302	GJA1	0.989652	1.53123	1.26044	0.870562
SDTATGGESAGHATSSQEPSGCSDQRPAEDLNIR	UBX domain-containing protein 4	Q92575	UBXN4	1.83559	2.287	2.0613	1.15844
SECLNNIGDSSPLIR	Transportin-1	Q92973	TNPO1	1.06323	-0.0136657	0.524783	0.293981
SEDADRCTLPEHESPSQDISDACEAESTER	Leucine-rich repeat flightless-interacting protein 1	Q32MZ4	LRRFIP1	0.0279223	-0.0228025	0.00255989	0.0287421
SEGGSGGGAAGGGAGGAGAGAGCGSGGSSVGVR	BMP-2-inducible protein kinase	Q9NSY1	BMP2K	-0.134313	-2.20457	-1.16944	0.336053
SEGTYCCGPVPVR	Protein-glutamine gamma-glutamyltransferase 2	P21980	TGM2	0.547089	-0.140844	0.203122	0.180186
SETVLTCATGR	Integrin alpha-3	P26006	ITGA3	0.599719		0.599719
SFIPKDNQNFCVPCYEK	Four and a half LIM domains protein 2	Q14192	FHL2		0.00664984	0.00664984
SGCSDLEEAVDSGADKK	Golgi-specific brefeldin A-resistance guanine nucleotide exchange factor 1	Q92538	GBF1	0.962396		0.962396
SGCSEAQPPESPETR	Transforming acidic coiled-coil-containing protein 3	Q9Y6A5	TACC3	1.10122		1.10122
SGDLFNCGSLTIR	2-oxoisovalerate dehydrogenase subunit beta, mitochondrial	P21953	BCKDHB	-0.208932		-0.208932
SGFHTVPGQPGCQDINECLR	Prolow-density lipoprotein receptor-related protein 1	Q07954	LRP1	0.955605	1.74296	1.34928	0.742972
SGGSGGCSGAGGASNCGTGSGR	Signal peptidase complex subunit 2	Q15005	SPCS2	1.42386	0.453638	0.938751	0.517629
SGGSSCSQTPSR	Eukaryotic translation initiation factor 4E-binding protein 1	Q13541	EIF4EBP1	0.978874	-0.0789749	0.44995	0.258651
SGHCIPLR	Prolow-density lipoprotein receptor-related protein 1	Q07954	LRP1	1.86314	1.01219	1.43767	0.737127
SGLAYCPNDYHQLFSPR	Leupaxin	O60711	LPXN	0.351114	1.50711	0.929114	0.450647
SGLDDVEASSSYSNEQQLCPYAAAGECR	Probable E3 ubiquitin-protein ligase makorin-2	Q9H000	MKRN2		0.545237	0.545237
SGNGNKPPSTDLKTCDKK	Ras-related protein Rab-13	P51153	RAB13		3.06387	3.06387
SGQGAFGNMCR	60S ribosomal protein L4	P36578	RPL4		0.473101	0.473101
SGSAAQAEGLCK	Dol-P-Man:Man(5)GlcNAc(2)-PP-Dol alpha-1,3-mannosyltransferase	Q92685	ALG3	1.2063	1.32235	1.26433	1.53467
SHAVACVNQFIISR	Transportin-1	Q92973	TNPO1	0.486027		0.486027
SHAYYVCAWDR	Myeloid-associated differentiation marker	Q96S97	MYADM	-0.692745		-0.692745
SHCFTQAMLSQPR	Phosphatidylethanolamine N-methyltransferase	Q9UBM1	PEMT		0.535576	0.535576
SHESLLSPCSTVECLDLGR	Ras GTPase-activating protein nGAP	Q9UJF2	RASAL2	0.850165	0.827167	0.838666	2.05909
SHLLNCCPHDVLSGTR	Putative RNA-binding protein Luc7-like 2	Q9Y383	LUC7L2		-1.74875	-1.74875
SHTEEDCTEELFDFLHAR	Cytochrome b-c1 complex subunit 6, mitochondrial	P07919	UQCRH		0.40725	0.40725
SIAVYYDNPHMVPPDKCR	Testis-expressed protein 264	Q9Y6I9	TEX264	-0.382013		-0.382013
SIGTDNVCR	Importin-11	Q9UI26	IPO11		0.910381	0.910381
SIKDTICNQDER	Coronin-1C	Q9ULV4	CORO1C	0.31861	0.150161	0.234386	0.658336
SIPICTLK	Ubiquitin-like modifier-activating enzyme 1	P22314	UBA1		-0.0497189	-0.0497189
SIPLECPLSSPK	A-kinase anchor protein 1, mitochondrial	Q92667	AKAP1	3.49251	2.79827	3.14539	1.15507
SISLTRPGSSSLSSGPNSILCR	Pleckstrin homology domain-containing family A member 2	Q9HB19	PLEKHA2	2.37876		2.37876
SITCWTLSR	Transportin-1	Q92973	TNPO1	-0.641906	-0.0457922	-0.343849	0.342312
SKDSLVQSCPGSLSLCAGVK	Serine/arginine repetitive matrix protein 2	Q9UQ35	SRRM2		2.58469	2.58469
SKGCGVVKFESPEVAER	Heterogeneous nuclear ribonucleoprotein M	P52272	HNRNPM	-1.70579	-1.41617	-1.56098	1.22995
SKLTFSCLGGSDNFK	Prostaglandin E synthase 3	Q15185	PTGES3		-0.566509	-0.566509
SLCIPFKPLCELQPGAK	Bifunctional glutamate/proline--tRNA ligase	P07814	EPRS1		0.45057	0.45057
SLCMDTSLDVYR	Dehydrogenase/reductase SDR family member 7	Q9Y394	DHRS7	-0.666197	-1.31224	-0.989219	0.696947
SLCMDTSLDVYRK	Dehydrogenase/reductase SDR family member 7	Q9Y394	DHRS7	-0.5286	0.53012	0.000760323	0.000397292
SLCVSTPGHR	GPI-anchor transamidase	Q92643	PIGK	0.44773	0.671596	0.559663	0.900781
SLDAFPEDFCR	N-terminal kinase-like protein	Q96KG9	SCYL1	-0.890542	1.33748	0.22347	0.0585049
SLEDLQDEYDFKCK	Signal transducer and activator of transcription 1-alpha/beta	P42224	STAT1		0.67278	0.67278
SLEICHPQER	Acyl-coenzyme A thioesterase 9, mitochondrial	Q9Y305	ACOT9	0.548332		0.548332
SLEKVCADLIR	40S ribosomal protein S20	P60866	RPS20	0.288551	0.2418	0.265176	1.25201
SLFCPLDMGR	SH2 domain-containing protein 5	Q6ZV89	SH2D5		2.49861	2.49861
SLGQASEADPSGVASIACSSCVR	Apoptosis regulatory protein Siva	O15304	SIVA1		-3.0425	-3.0425
SLHCHVCNCCVAR	Palmitoyltransferase ZDHHC13	Q8IUH4	ZDHHC13	-0.656312	0.491569	-0.0823716	0.0413155
SLHDALCVLAQTVK	T-complex protein 1 subunit beta	P78371	CCT2		0.762256	0.762256
SLHDALCVVKR	T-complex protein 1 subunit alpha	P17987	TCP1	0.507306		0.507306
SLIANLAAANCYKK	Adenosine kinase	P55263	ADK	1.47518	0.343356	0.909266	0.450487
SLLPGCQSVISR	Persulfide dioxygenase ETHE1, mitochondrial	O95571	ETHE1	0.142595	-0.343384	-0.100395	0.124609
SLNCTLR	Interleukin-1 beta	P01584	IL1B	0.284415	0.632988	0.458701	0.636083
SLPDCTPHPNSISIDAGPR	Disks large-associated protein 4	Q9Y2H0	DLGAP4	0.775598		0.775598
SLPGPAPCLK	AMP deaminase 2	Q01433	AMPD2		-0.0156239	-0.0156239
SLPRPIDGVSDWSQGCSLR	TIR domain-containing adapter molecule 1	Q8IUC6	TICAM1		1.47499	1.47499
SLPSVETLGCTSVICSDK	Sarcoplasmic/endoplasmic reticulum calcium ATPase 2	P16615	ATP2A2	1.38542	2.25687	1.82114	0.825341
SLQEEEPCPR	Muskelin	Q9UL63	MKLN1	2.19548		2.19548
SLRECELYVQK	cAMP-dependent protein kinase type I-alpha regulatory subunit	P10644	PRKAR1A		0.418217	0.418217
SLTPALCR	Maternal embryonic leucine zipper kinase	Q14680	MELK	2.09218		2.09218
SMSAAFCSLLAPER	Ras and Rab interactor 1	Q13671	RIN1		-0.134448	-0.134448
SMSVYCTPNKPSR	Sarcoplasmic/endoplasmic reticulum calcium ATPase 2	P16615	ATP2A2	0.427636	0.205682	0.316659	0.668379
SMVSPVPSPTGTISVPNSCPASPR	Forkhead box protein K1	P85037	FOXK1		1.05488	1.05488
SNELGDVGVHCVLQGLQTPSCK	Ribonuclease inhibitor	P13489	RNH1		-0.177235	-0.177235
SNGLICGGNGVCK	Integrin beta-1	P05556	ITGB1	0.564862	0.149898	0.35738	0.475129
SPGHILCCECGVPISPNPANICVACLR	60S ribosomal export protein NMD3	Q96D46	NMD3		2.33648	2.33648
SPIDQCNPVHAR	Protein cornichon homolog 3	Q8TBE1	CNIH3		0.819035	0.819035
SPIPLECGAACDVR	SH2B adapter protein 3	Q9UQQ2	SH2B3		2.35988	2.35988
SPVPLTPPGCVALDTR	Mpv17-like protein 2	Q567V2	MPV17L2	1.49363	1.11065	1.30214	1.03173
SQACEPSEPEIEIK	DNA (cytosine-5)-methyltransferase 1	P26358	DNMT1		-2.04596	-2.04596
SQDVAVSPQQQQCSK	Enhancer of mRNA-decapping protein 3	Q96F86	EDC3	0.869327		0.869327
SQGCSEQVLTVLK	DNA-dependent protein kinase catalytic subunit	P78527	PRKDC		1.70681	1.70681
SQICDNAALYAQK	Exportin-2	P55060	CSE1L		-0.732694	-0.732694
SQLELLISPTCSCK	Sister chromatid cohesion protein PDS5 homolog A	Q29RF7	PDS5A	0.383342		0.383342
SQSPAASDCSSSSSSASLPSSGR	BAG family molecular chaperone regulator 3	O95817	BAG3		0.661691	0.661691
SQSYIPTSGCR	Pleckstrin homology domain-containing family A member 2	Q9HB19	PLEKHA2	2.01267	2.31314	2.16291	1.35509
SRDFNEECPR	Integrin-linked protein kinase	Q13418	ILK	1.5203	0.138286	0.829294	0.35433
SRYPVCGSDGTTYPSGCQLR	Insulin-like growth factor-binding protein 7	Q16270	IGFBP7	0.268928	3.5295	1.89921	0.345259
SSCELEVLLR	TRIO and F-actin-binding protein	Q9H2D6	TRIOBP	2.71167		2.71167
SSEHINEGETAMLVCK	Basigin	P35613	BSG	3.20995	0.648431	1.92919	0.428167
SSEKNEDFAAHPGEDAVPTGPDCQAK	A-kinase anchor protein 12	Q02952	AKAP12	0.813513	0.187001	0.500257	0.448355
SSFESSCPQQWIK	Cytochrome c oxidase assembly factor 6 homolog	Q5JTJ3	COA6		3.04314	3.04314
SSGEIVYCGQVFEK	60S ribosomal protein L18a	Q02543	RPL18A	0.0518641	-0.0301634	0.0108503	0.0781305
SSGFLPASQQACAK	Transmembrane protein 214	Q6NUQ4	TMEM214	1.40901		1.40901
SSIEDAQCPGLPDLIEENHVVNK	Disks large-associated protein 5	Q15398	DLGAP5	0.960678	1.03356	0.997121	1.63345
SSPVEFECINEK	Copine-3	O75131	CPNE3	0.668586	0.312266	0.490426	0.653977
SSQQPVSEVSTIPCPR	Pericentriolar material 1 protein	Q15154	PCM1	-0.1024		-0.1024
SSRPDTLLSPEQPVCPAGGSGGPPSSASPEVEAGPQGCATEPRPHR	Microtubule-associated protein 1A	P78559	MAP1A		1.28995	1.28995
SSSQPSSCCSDPSKPGGNVEGATQSLAEQMR	Sequestosome-1	Q13501	SQSTM1	1.09931	0.549508	0.824409	0.688456
SSSSVTTSETQPCTPSSSDYSDLQR	Vasodilator-stimulated phosphoprotein	P50552	VASP		0.693821	0.693821
SSTDILRCDLDSTGLK	Protein AHNAK2	Q8IVF2	AHNAK2	1.77712	2.62917	2.20314	0.915056
SSVVPCELACR	Zinc transporter 1	Q9Y6M5	SLC30A1	0.777646		0.777646
STACQMLVCYAK	Importin-5	O00410	IPO5	-0.316706	-0.0386476	-0.177677	0.373972
STCIYGGAPK	Probable ATP-dependent RNA helicase DDX5	P17844	DDX5	0.264899	-2.29127	-1.01318	0.241636
STFQAHLAPVVCPK	Protein IMPACT	Q9P2X3	IMPACT	0.118852	0.0879757	0.103414	1.0253
STGCDFAVSPK	Succinyl-CoA:3-ketoacid coenzyme A transferase 1, mitochondrial	P55809	OXCT1	-1.07052		-1.07052
STLTDSLVCK	Elongation factor 2	P13639	EEF2	1.03632	1.01324	1.02478	2.14457
STNICSFKDR	Protein FAM72C	H0Y354	FAM72C	-2.08381	-0.566267	-1.32504	0.480067
STPYECGFDPMSPAR	NADH-ubiquinone oxidoreductase chain 3	P03897	MT-ND3	1.33953	-0.437166	0.451183	0.154389
STQYLNQHQTAAMCK	Poly(ADP-ribose) glycohydrolase	Q86W56	PARG	0.883698		0.883698
SVAWAPSGNLLATCSR	Probable cytosolic iron-sulfur protein assembly protein CIAO1	O76071	CIAO1	0.354202	0.30945	0.331826	1.3679
SVCTEAGMFAIR	26S proteasome regulatory subunit 7	P35998	PSMC2	-0.274869	0.0199609	-0.127454	0.262688
SVGGACVLVA	60S ribosomal protein L27a	P46776	RPL27A	0.46912	0.401093	0.435106	1.30395
SVHYCPATK	DNA replication licensing factor MCM3	P25205	MCM3	-0.0105873	-1.94924	-0.979911	0.304044
SVHYCPATKK	DNA replication licensing factor MCM3	P25205	MCM3		0.67744	0.67744
SVPLCILYEK	Protein-glutamine gamma-glutamyltransferase 2	P21980	TGM2	0.0385962	0.104351	0.0714734	0.561509
SVSPCSNVESR	Serine/arginine repetitive matrix protein 2	Q9UQ35	SRRM2	1.1585	1.30187	1.23019	1.43116
SVSPLVWCR	SLAIN motif-containing protein 2	Q9P270	SLAIN2		1.26256	1.26256
SVTVVEDDEDEDGDDLLHHHHGSHCSSSGDPAEYNLR	Prelamin-A/C	P02545	LMNA	2.26411	0.692403	1.47825	0.507155
SVVIDCSSSQPQFCNAGSNR	Protein Njmu-R1	Q9HAS0	C17orf75		0.681359	0.681359
SWCPDCVQAEPVVR	Thioredoxin domain-containing protein 17	Q9BRA2	TXNDC17	0.289683	0.12507	0.207376	0.618829
SWHLTPSCPLDPAPLR	Interleukin-1 receptor-associated kinase 1	P51617	IRAK1	0.363772		0.363772
SWHPEEFNCAHCK	PDZ and LIM domain protein 5	Q96HC4	PDLIM5	-2.0787	-0.805526	-1.44211	0.577339
SWKEPCQVQSCQEEMISLGDGDIR	Condensin complex subunit 2	Q15003	NCAPH	0.791667	2.53418	1.66292	0.512525
SYCAEIAHNVSSK	60S ribosomal protein L32	P62910	RPL32	0.310853	2.47953	1.39519	0.376128
SYESMCEYQR	SPARC-related modular calcium-binding protein 1	Q9H4F8	SMOC1	2.70649	0.356611	1.53155	0.380282
SYFLTIPYEECK	Nicotinamide riboside kinase 1	Q9NWW6	NMRK1		-0.57592	-0.57592
TACTNFMMTPYVVTR	Mitogen-activated protein kinase 9	P45984	MAPK9		-2.88224	-2.88224
TADPCCYGHTQFHLLPDK	39S ribosomal protein S30, mitochondrial	Q9NP92	MRPS30		2.46956	2.46956
TAENKLDTKYPYVCHAELNAIMNK	Deoxycytidylate deaminase	P32321	DCTD	0.244432		0.244432
TAEQSCDQKLTNTNR	E3 ubiquitin-protein ligase UHRF1	Q96T88	UHRF1		-0.233919	-0.233919
TAICNLILGNPPSK	RNA-binding protein PNO1	Q9NRX1	PNO1	0.235661		0.235661
TAIHTAAMDMLGGPGIESQCR	Hydroxysteroid dehydrogenase-like protein 2	Q6YN16	HSDL2	1.34601	1.20454	1.27527	1.45254
TASDCGAVK	Prosaposin	P07602	PSAP	1.13391		1.13391
TATAVAHCK	40S ribosomal protein S16	P62249	RPS16	0.384383	0.411393	0.397888	1.66555
TATAVAHCKR	40S ribosomal protein S16	P62249	RPS16	1.76671	0.256898	1.0118	0.389262
TATCHSSSSPPIDAASAEPYGFR	Microtubule-associated protein 1B	P46821	MAP1B	2.23462		2.23462
TAVCDIPPR	Tubulin beta-4B chain	P68371	TUBB4B	0.906011	0.200482	0.553247	0.442056
TCADVDECSTTFPCSQR	Prolow-density lipoprotein receptor-related protein 1	Q07954	LRP1		1.44421	1.44421
TCDAFTYTGCGGNDNNFVSR	Tissue factor pathway inhibitor 2	P48307	TFPI2	0.265835	0.4152	0.340518	0.861864
TCDAFTYTGCGGNDNNFVSREDCKR	Tissue factor pathway inhibitor 2	P48307	TFPI2	3.98101		3.98101
TCGPSSFSCPGTHVCVPER	Prolow-density lipoprotein receptor-related protein 1	Q07954	LRP1		1.19462	1.19462
TCLLIVFSK	Transforming protein RhoA	P61586	RHOA		-0.786216	-0.786216
TCPPNQFSCASGR	Prolow-density lipoprotein receptor-related protein 1	Q07954	LRP1	0.0474969		0.0474969
TCTLENVK	Glutamine--fructose-6-phosphate aminotransferase [isomerizing] 2	O94808	GFPT2	0.445095	0.707717	0.576406	0.845897
TCTTVAFTQVNSEDKGALAK	60S ribosomal protein L7a	P62424	RPL7A	-0.207407	-0.183891	-0.195649	1.41777
TCVLFR	Ras-related protein Rab-10	P61026	RAB10		0.230149	0.230149
TCYEGNGHFYR	Urokinase-type plasminogen activator	P00749	PLAU	0.8158	0.932087	0.873944	1.37374
TDACFIR	26S proteasome regulatory subunit 7	P35998	PSMC2	0.0357526	0.35851	0.197131	0.359795
TDFQQGCAK	Persulfide dioxygenase ETHE1, mitochondrial	O95571	ETHE1	-0.0437468	-0.393609	-0.218678	0.367003
TDIQIALPSGCYGR	Deoxyuridine 5'-triphosphate nucleotidohydrolase, mitochondrial	P33316	DUT		-0.3923	-0.3923
TDSCSSAQAQYDTPK	Discoidin, CUB and LCCL domain-containing protein 2	Q96PD2	DCBLD2	0.360679	1.0082	0.68444	0.550855
TEVMALVPPADCR	Guanidinoacetate N-methyltransferase	Q14353	GAMT	4.01133	-0.738159	1.63659	0.210523
TFLPEMSEKCEVLQYSAR	NADH dehydrogenase [ubiquinone] 1 alpha subcomplex subunit 10, mitochondrial	O95299	NDUFA10	0.31043	-1.17311	-0.431342	0.177382
TFVSGACDASIK	Guanine nucleotide-binding protein G(I)/G(S)/G(T) subunit beta-2	P62879	GNB2	0.638681	0.440633	0.539657	0.937301
TGAVYLCPLTAHKDDCER	Integrin alpha-3	P26006	ITGA3	-0.544856		-0.544856
TGCIGAK	60S ribosomal protein L11	P62913	RPL11	0.146703	0.273654	0.210178	0.728811
TGCTFPEKPDFH	Adenosine kinase	P55263	ADK		2.85922	2.85922
TGDHTMDIPGCLLYTK	Queuine tRNA-ribosyltransferase accessory subunit 2	Q9H974	QTRT2		-0.835392	-0.835392
TGSQGQCTQVR	40S ribosomal protein S28	P62857	RPS28	1.12049	1.43631	1.2784	1.10657
TGTELVLLTAAPPPPPRPGPCAYAAHGR	Proline-rich AKT1 substrate 1	Q96B36	AKT1S1	0.738497		0.738497
TGTQEVGGQDPGEAVQPCR	Opioid growth factor receptor	Q9NZT2	OGFR		1.50857	1.50857
TGTSCALDCGAGIGR	N-terminal Xaa-Pro-Lys N-methyltransferase 1	Q9BV86	NTMT1	0.236481	0.579535	0.408008	0.596271
TGVHHYSGNNIELGTACGK	60S ribosomal protein L30	P62888	RPL30		0.165187	0.165187
THPSAAVPVCPR	MAP7 domain-containing protein 1	Q3KQU3	MAP7D1	0.957134	0.575554	0.766344	0.808728
THSLVCPETVSR	Nuclear receptor 2C2-associated protein	Q86WQ0	NR2C2AP	0.77198	1.34798	1.05998	0.772382
TIAPCQK	Stress-70 protein, mitochondrial	P38646	HSPA9		1.11518	1.11518
TICSHVQNMIK	60S ribosomal protein L9	P32969	RPL9	0.324117	0.365823	0.34497	1.41526
TIESIQLSPEEYECLKGK	Mitochondrial ribonuclease P catalytic subunit	O15091	PRORP		1.08706	1.08706
TIIPLISQCTPK	Malate dehydrogenase, mitochondrial	P40926	MDH2	0.094535		0.094535
TILVYSRPPCQPQFSLTEPMKK	BRISC and BRCA1-A complex member 1	Q9NWV8	BABAM1		0.852134	0.852134
TIPTDDNVVCFTR	Aldehyde dehydrogenase family 1 member A3	P47895	ALDH1A3	0.591594	0.265563	0.428579	0.635659
TISESSSCPSCGQTCHMSGK	Proline-rich protein 11	Q96HE9	PRR11	0.114101	1.50648	0.810291	0.344983
TIYAGNALCTVK	Electron transfer flavoprotein subunit alpha, mitochondrial	P13804	ETFA		-2.08761	-2.08761
TIYAGNALCTVKCDEK	Electron transfer flavoprotein subunit alpha, mitochondrial	P13804	ETFA	1.40902		1.40902
TKENVNATENCISAVGK	Importin-5	O00410	IPO5	0.182799	0.117251	0.150025	0.863525
TKSCSGVEFSTSGHAYTDTGK	Voltage-dependent anion-selective channel protein 3	Q9Y277	VDAC3	-0.259231	0.0333336	-0.112949	0.235515
TKSCSGVEFSTSGSSNTDTGK	Voltage-dependent anion-selective channel protein 2	P45880	VDAC2	0.802037	0.372823	0.58743	0.65172
TKSCSGVEFSTSGSSNTDTGKVTGTLETK	Voltage-dependent anion-selective channel protein 2	P45880	VDAC2	0.749835	1.36098	1.05541	0.746142
TLAPSLPCPGGR	Armadillo repeat-containing X-linked protein 1	Q9P291	ARMCX1		2.02194	2.02194
TLCGTPNYIAPEVLSK	Serine/threonine-protein kinase PLK1	P53350	PLK1	2.7036		2.7036
TLESQNLFCCLYR	Protein VAC14 homolog	Q08AM6	VAC14		-0.169127	-0.169127
TLETANCMSSQTK	Carnitine O-palmitoyltransferase 1, liver isoform	P50416	CPT1A	1.03754	2.49135	1.76444	0.604179
TLGSGACGEVK	Serine/threonine-protein kinase Chk2	O96017	CHEK2	1.82548	-0.573733	0.625874	0.158727
TLLCLCR	Ankyrin repeat and SOCS box protein 1	Q9Y576	ASB1	-3.1721		-3.1721
TLPGGNQCIVPICR	Fibrillin-1	P35555	FBN1		-0.812065	-0.812065
TLVKNCIVLIDSTPYR	40S ribosomal protein S8	P62241	RPS8	0.499671	0.480058	0.489865	1.89473
TLWEDPGIQECYDR	Guanine nucleotide-binding protein subunit alpha-11	P29992	GNA11	0.131446		0.131446
TMDAGCKPYMAPER	Dual specificity mitogen-activated protein kinase kinase 3	P46734	MAP2K3		1.28486	1.28486
TMQFEPSTMVYDACR	Talin-1	Q9Y490	TLN1	-1.90643		-1.90643
TMSVLSCICEAR	TP53-binding protein 1	Q12888	TP53BP1		0.444928	0.444928
TNGDCRVEECALGQDLCR	Urokinase plasminogen activator surface receptor	Q03405	PLAUR	-0.0159105	0.903239	0.443664	0.291398
TNHIGHTGYLNTVTVSPDGSLCASGGK	Receptor of activated protein C kinase 1	P63244	RACK1	0.465815	0.237207	0.351511	0.698645
TNHIGHTGYLNTVTVSPDGSLCASGGKDGQAMLWDLNEGK	Receptor of activated protein C kinase 1	P63244	RACK1		0.324411	0.324411
TNLCQK	Alcohol dehydrogenase class-3	P11766	ADH5	0.471422		0.471422
TPCEEVYVK	Filamin-C	Q14315	FLNC	-0.790152	-0.0759891	-0.43307	0.357571
TPCNAGTFSQPEK	Mitotic checkpoint protein BUB3	O43684	BUB3	0.798801	0.304834	0.551817	0.572002
TPCSSLLPLLNAHAATSGK	SPATS2-like protein	Q9NUQ6	SPATS2L		1.04936	1.04936
TPDGNLDQCK	High affinity cationic amino acid transporter 1	P30825	SLC7A1	1.76226	1.31423	1.53824	1.03591
TPDTSTYCYETAEK	Microtubule-associated protein 1B	P46821	MAP1B	0.398073	0.583326	0.490699	0.92528
TPGAATASASGAAEDGACGCLPNPGTFEECHR	Mitochondrial import receptor subunit TOM40 homolog	O96008	TOMM40	1.34439	1.52045	1.43242	1.40811
TPGAATASASGAAEDGACGCLPNPGTFEECHRK	Mitochondrial import receptor subunit TOM40 homolog	O96008	TOMM40	1.29464	1.26971	1.28218	2.20839
TPGHPPPPEIPSELGACDFEKPESPR	Golgi-specific brefeldin A-resistance guanine nucleotide exchange factor 1	Q92538	GBF1	0.497151	0.273355	0.385253	0.744831
TPLCNLLVK	Probable C-mannosyltransferase DPY19L1	Q2PZI1	DPY19L1	0.92412		0.92412
TPPLLENSLPQCYQR	Zinc transporter 7	Q8NEW0	SLC30A7	0.606645	1.19186	0.899251	0.698384
TPQASTYSYETSDLCYTAEKK	Microtubule-associated protein 1B	P46821	MAP1B		0.552272	0.552272
TPQSPAPCVLLR	FH1/FH2 domain-containing protein 1	Q9Y613	FHOD1		1.53845	1.53845
TPSVSAPLALSCPR	LIM domain-containing protein 1	Q9UGP4	LIMD1	0.802341	0.271608	0.536974	0.53432
TQAIVCQQLDLTHLK	ATP-binding cassette sub-family E member 1	P61221	ABCE1		0.517629	0.517629
TQEQCVHNETKNELEK	Dynamin-like 120 kDa protein, mitochondrial	O60313	OPA1	0.668536		0.668536
TQIAICPNNHEVHIYEK	Actin-related protein 2/3 complex subunit 1B	O15143	ARPC1B		-0.350502	-0.350502
TQSPCFGDDDPAKKEPR	Secernin-1	Q12765	SCRN1	-1.06579		-1.06579
TRPDGNCFYR	Ubiquitin thioesterase OTUB1	Q96FW1	OTUB1	-0.914336		-0.914336
TRPSSLESVTCWR	Leucine-rich repeat-containing protein 41	Q15345	LRRC41	-0.727677		-0.727677
TSAPITCELLNK	Cytoplasmic dynein 1 heavy chain 1	Q14204	DYNC1H1	-1.45135		-1.45135
TSCGSPNYAAPEVISGR	5'-AMP-activated protein kinase catalytic subunit alpha-1	Q13131	PRKAA1	1.04519		1.04519
TSESLCQNNMVILK	Exportin-1	O14980	XPO1	1.12542	0.987219	1.05632	1.38104
TSEVNCYR	Cellular nucleic acid-binding protein	P62633	CNBP		-0.352216	-0.352216
TSLCYAPSWVCDGANDCGDYSDERDCPGVK	Prolow-density lipoprotein receptor-related protein 1	Q07954	LRP1	2.16964	2.6599	2.41477	1.19109
TSMCSIQSAPPEPATLK	Calpastatin	P20810	CAST	-0.0674879	1.34013	0.636323	0.274062
TSSDPTCVEKEK	Exportin-1	O14980	XPO1	0.301479	0.945594	0.623536	0.517818
TSSSSCSAHSSFSSTGQPR	Rho guanine nucleotide exchange factor 6	Q15052	ARHGEF6	0.867992		0.867992
TSVPCAGATAFPADSDR	Cysteine protease ATG4B	Q9Y4P1	ATG4B	2.12362	2.49474	2.30918	1.29202
TTCMSSQGSDDEQIKR	Septin-10	Q9P0V9	SEPTIN10		-0.639801	-0.639801
TTEDEVHICHNQDGYSYPSR	Low-density lipoprotein receptor	P01130	LDLR	0.869084	2.31904	1.59406	0.565857
TTEEQVQASTPCPR	Ribosome biogenesis protein BOP1	Q14137	BOP1		-0.602899	-0.602899
TTLSNGGCQYLCLPAPQINPHSPK	Low-density lipoprotein receptor	P01130	LDLR	1.03288		1.03288
TTPCSSAIINPLSTAGNSER	Receptor-interacting serine/threonine-protein kinase 2	O43353	RIPK2	2.89022	2.19438	2.5423	1.06255
TTSEGATNCVCR	Ephrin type-B receptor 2	P29323	EPHB2		0.123164	0.123164
TTWGDGGENSPCNVVSK	Synaptosomal-associated protein 23	O00161	SNAP23	0.921364	0.75068	0.836022	1.18868
TVCDAAEK	Perilipin-3	O60664	PLIN3	0.632832	0.494741	0.563787	1.11026
TVCGENLPPLTYDQLK	Lanosterol 14-alpha demethylase	Q16850	CYP51A1	-0.621652	1.26318	0.320762	0.101742
TVCGVVSR	Hexokinase-1	P19367	HK1		-1.14082	-1.14082
TVDLGLTGNHGVVHPSLADSANKFEENTYCFGR	Complex I assembly factor ACAD9, mitochondrial	Q9H845	ACAD9		0.957413	0.957413
TVEICPFSFDSR	Targeting protein for Xklp2	Q9ULW0	TPX2		1.06101	1.06101
TVFAEHISDECK	60S ribosomal protein L3	P39023	RPL3	0.45616	0.5039	0.48003	1.49989
TVFAEHISDECKR	60S ribosomal protein L3	P39023	RPL3		0.553248	0.553248
TVGVQGDCR	GMP synthase [glutamine-hydrolyzing]	P49915	GMPS	-0.42426	0.744524	0.160132	0.0810599
TVIEPMACDGLR	Plasma membrane calcium-transporting ATPase 4	P23634	ATP2B4		0.387403	0.387403
TVLCGTCGQPADK	Prelamin-A/C	P02545	LMNA	0.237962	0.314688	0.276325	1.05639
TVMPCGTVVTTVTAVK	C2 domain-containing protein 2	Q9Y426	C2CD2		0.667991	0.667991
TVNSNCEINNR	Pericentriolar material 1 protein	Q15154	PCM1		0.300835	0.300835
TVSYNGILGPECGTK	Protein-glutamine gamma-glutamyltransferase 2	P21980	TGM2	0.0640307	-0.853189	-0.394579	0.261467
TVVALCGQR	CD151 antigen	P48509	CD151	0.0505777		0.0505777
TVYCNVHK	Transcription intermediary factor 1-beta	Q13263	TRIM28		4.36692	4.36692
TYAICGAIR	40S ribosomal protein S21	P63220	RPS21	0.818191	0.787009	0.8026	1.9078
TYCCDLK	Mitochondrial carrier homolog 2	Q9Y6C9	MTCH2	-0.198492	-0.202577	-0.200534	2.18821
TYDPSGDSTLPTCSK	Nucleolar protein 58	Q9Y2X3	NOP58	1.1818		1.1818
TYITDPVSAPCAPPLQPK	Lipoma-preferred partner	Q93052	LPP	0.899583	1.39692	1.14825	0.86719
TYPGVMHSSCPQEMAAVK	Acyl-protein thioesterase 2	O95372	LYPLA2	0.139517	0.109355	0.124436	1.11474
TYSECEDGTYSPEISWHHR	Phosphatidylserine synthase 1	P48651	PTDSS1		-0.238553	-0.238553
VAAAESMPLLLECAR	Importin-5	O00410	IPO5		-0.18666	-0.18666
VAAASGHCGAFSGSDSSR	Constitutive coactivator of PPAR-gamma-like protein 1	Q9NZB2	FAM120A		1.23258	1.23258
VAAQCSHAAVSAYK	Peptidyl-tRNA hydrolase 2, mitochondrial	Q9Y3E5	PTRH2	0.23606	0.430302	0.333181	0.743356
VACETVAK	S-adenosylmethionine synthase isoform type-2	P31153	MAT2A	0.313164	0.338876	0.32602	1.60049
VACIGAWHPAR	60S ribosomal protein L3	P39023	RPL3	0.728421	0.445053	0.586737	0.821479
VAFYCK	All-trans retinoic acid-induced differentiation factor	Q6UW56	ATRAID		1.22601	1.22601
VAGINACGR	Host cell factor 1	P51610	HCFC1	2.46327	-0.390723	1.03627	0.221743
VAHSFNCTPIEGMLSHQLK	Proliferation-associated protein 2G4	Q9UQ80	PA2G4	-0.413089	-1.41502	-0.914054	0.495971
VAILVDDMADTCGTICHAADK	Ribose-phosphate pyrophosphokinase 2	P11908	PRPS2		0.51833	0.51833
VALEGLRPTIPPGISPHVCK	Integrin-linked protein kinase	Q13418	ILK	0.810422	1.48431	1.14737	0.740304
VALNVSCANLLDKDIGSK	Copine-3	O75131	CPNE3		-0.484917	-0.484917
VAQATCK	Hydroxymethylglutaryl-CoA lyase, mitochondrial	P35914	HMGCL	-0.2307		-0.2307
VAQATCKL	Hydroxymethylglutaryl-CoA lyase, mitochondrial	P35914	HMGCL	0.309166	-0.303244	0.00296102	0.00268176
VASFSCMCPEGK	Neurogenic locus notch homolog protein 2	Q04721	NOTCH2	2.2001		2.2001
VASGSTATAAAGPSCALK	DNA-binding protein inhibitor ID-1	P41134	ID1	2.50721	0.917666	1.71244	0.558098
VATFHDCEDAAR	Dolichol-phosphate mannosyltransferase subunit 3	Q9P2X0	DPM3	0.284015	0.097013	0.190514	0.53692
VAVCDIPPR	Tubulin beta-6 chain	Q9BUF5	TUBB6	-0.196893		-0.196893
VAYQDPSSGCTSK	Ras and Rab interactor 1	Q13671	RIN1		0.737206	0.737206
VCADLIR	40S ribosomal protein S20	P60866	RPS20	0.531093	0.12399	0.327542	0.451011
VCALLSCTSHK	Aldo-keto reductase family 1 member B1	P15121	AKR1B1	1.50785		1.50785
VCALLSCTSHKDYPFHEEF	Aldo-keto reductase family 1 member B1	P15121	AKR1B1	1.77214	1.69353	1.73284	1.84049
VCASDTR	PCI domain-containing protein 2	Q5JVF3	PCID2		1.35283	1.35283
VCCEGMLIQLR	Coiled-coil domain-containing protein 47	Q96A33	CCDC47	0.297164		0.297164
VCDSCYDSIKDEDR	WD repeat and FYVE domain-containing protein 1	Q8IWB7	WDFY1	-0.902219		-0.902219
VCENIPIVLCGNK	GTP-binding nuclear protein Ran	P62826	RAN	-0.578999		-0.578999
VCENIPIVLCGNKVDIK	GTP-binding nuclear protein Ran	P62826	RAN	0.522473	-0.16798	0.177246	0.156123
VCEPCYEQLNR	Hepatocyte growth factor-regulated tyrosine kinase substrate	O14964	HGS		-2.18389	-2.18389
VCETDGCSSEAK	Methionine aminopeptidase 1	P53582	METAP1	0.0651997	0.0279542	0.0465769	0.615928
VCFGMLPK	Peptidyl-tRNA hydrolase 2, mitochondrial	Q9Y3E5	PTRH2	1.00475		1.00475
VCISILHAPGDDPMGYESSAER	Ubiquitin-conjugating enzyme E2 G2	P60604	UBE2G2	0.952709		0.952709
VCLCEACAAQEHR	E3 ubiquitin-protein ligase TRIM47	Q96LD4	TRIM47		0.524698	0.524698
VCLLGCGISTGYGAAVNTAK	Alcohol dehydrogenase class-3	P11766	ADH5	-0.263594		-0.263594
VCLLGDTGVGK	Ras-related protein Rab-31	Q13636	RAB31		0.611043	0.611043
VCNFLASQVPFPSR	3-hydroxyacyl-CoA dehydrogenase type-2	Q99714	HSD17B10		-0.0963511	-0.0963511
VCTPTTGR	THUMP domain-containing protein 3	Q9BV44	THUMPD3	0.638319		0.638319
VDASACGMER	Probable bifunctional dTTP/UTP pyrophosphatase/methyltransferase protein	O95671	ASMTL	1.33354		1.33354
VDCQAYAQTCQK	DnaJ homolog subfamily C member 10	Q8IXB1	DNAJC10	0.433134		0.433134
VDCTANTNTCNK	Protein disulfide-isomerase A3	P30101	PDIA3		-0.593407	-0.593407
VDCTANTNTCNKYGVSGYPTLK	Protein disulfide-isomerase A3	P30101	PDIA3		2.0698	2.0698
VDENFDCVEADDVEGK	Histone acetyltransferase type B catalytic subunit	O14929	HAT1	0.178263	0.615704	0.396983	0.494054
VDPECSVEDSK	Protein AHNAK2	Q8IVF2	AHNAK2		-0.291345	-0.291345
VDSPVTVCGDIHGQFYDLK	Serine/threonine-protein phosphatase 4 catalytic subunit	P60510	PPP4C	0.810239	0.83305	0.821644	2.05371
VDSTTCLFPVEEK	Glutamine--fructose-6-phosphate aminotransferase [isomerizing] 1	Q06210	GFPT1	0.0830579	-0.200376	-0.058659	0.124845
VDVAVNCAGIAVASK	3-hydroxyacyl-CoA dehydrogenase type-2	Q99714	HSD17B10	0.455581	0.762244	0.608912	0.80398
VEANLHGLTLYDTAPCPINNER	DNA damage-regulated autophagy modulator protein 2	Q6UX65	DRAM2	4.02029		4.02029
VECVGDDIAWMR	Phosphoenolpyruvate carboxykinase [GTP], mitochondrial	Q16822	PCK2	4.05267		4.05267
VEECALGQDLCR	Urokinase plasminogen activator surface receptor	Q03405	PLAUR	-0.266315	1.83033	0.782008	0.227691
VEEPSKYGVVVCEADTGR	Mannose-1-phosphate guanyltransferase beta	Q9Y5P6	GMPPB	0.813117		0.813117
VELPTCMYR	Aminoacyl tRNA synthase complex-interacting multifunctional protein 2	Q13155	AIMP2	-0.223678		-0.223678
VEMSVNDKAEASGCR	TRMT1-like protein	Q7Z2T5	TRMT1L	3.33031	0.805418	2.06787	0.457252
VEPSDRYPQCLCLSPTYELALQTGK	ATP-dependent RNA helicase DDX19A	Q9NUU7	DDX19A		-0.172836	-0.172836
VEYPIMYSTDPENGHIFNCIQR	Microsomal glutathione S-transferase 3	O14880	MGST3		0.54397	0.54397
VFANAPDSACVIGLK	ATP-dependent 6-phosphofructokinase, liver type	P17858	PFKL	4.09185	0.354893	2.22337	0.351715
VFCSHCGNK	RNA-binding protein NOB1	Q9ULX3	NOB1	2.93776		2.93776
VFEHDSVELNCK	S-formylglutathione hydrolase	P10768	ESD		-0.0167357	-0.0167357
VFFPLCGK	Thiopurine S-methyltransferase	P51580	TPMT	-0.152412		-0.152412
VFGSCPR	Proteasome assembly chaperone 1	O95456	PSMG1		0.0378624	0.0378624
VFHVGCFVCSTCR	Thyroid receptor-interacting protein 6	Q15654	TRIP6	-0.883702	-0.224166	-0.553934	0.466169
VFNDTCR	Leucine-rich PPR motif-containing protein, mitochondrial	P42704	LRPPRC	1.94369	0.644803	1.29425	0.528592
VFQSSTSQEQVYNDCAKK	Kinesin-1 heavy chain	P33176	KIF5B		0.413261	0.413261
VGAPLICCEIK	Long-chain-fatty-acid--CoA ligase 4	O60488	ACSL4	0.0909917	-0.0163706	0.0373106	0.21231
VGCAVQFCPK	Glioma pathogenesis-related protein 1	P48060	GLIPR1	0.471492	0.897026	0.684259	0.716879
VGCVWQTVR	Golgi-specific brefeldin A-resistance guanine nucleotide exchange factor 1	Q92538	GBF1		0.88261	0.88261
VGEATETALTCLVEK	Sarcoplasmic/endoplasmic reticulum calcium ATPase 2	P16615	ATP2A2	0.420053	0.272116	0.346084	0.872738
VGEFCHNR	Ubiquitin-like modifier-activating enzyme 1	P22314	UBA1		0.353647	0.353647
VGIIPPKGCLLYGPPGTGK	26S proteasome regulatory subunit 10B	P62333	PSMC6	0.100558	0.354895	0.227726	0.489154
VGLSGAPADACSTAQK	N-acylneuraminate cytidylyltransferase	Q8NFW8	CMAS	0.51819	0.246164	0.382177	0.662206
VGMGSGSICITQEVLACGRPQATAVYK	Inosine-5'-monophosphate dehydrogenase 2	P12268	IMPDH2		2.22187	2.22187
VGNCNTPKPSFFDFEGK	Acyl-CoA-binding domain-containing protein 6	Q9BR61	ACBD6		-0.434798	-0.434798
VGTECGNQK	Filamin-A	P21333	FLNA	-0.907334		-0.907334
VGVDYEGGGCR	Procollagen-lysine,2-oxoglutarate 5-dioxygenase 1	Q02809	PLOD1		0.71658	0.71658
VHPEEQGWICDPCHLAR	Melanophilin	Q9BV36	MLPH	-0.285431		-0.285431
VIACFDSLK	Muscleblind-like protein 1	Q9NR56	MBNL1		0.682842	0.682842
VICAEEPYICK	GMP synthase [glutamine-hydrolyzing]	P49915	GMPS		1.76592	1.76592
VIEDYSGACCPLNK	Palmitoyltransferase ZDHHC6	Q9H6R6	ZDHHC6		-2.06808	-2.06808
VIGIECSSISDYAVK	Protein arginine N-methyltransferase 1	Q99873	PRMT1	-0.179591	0.433194	0.126802	0.124826
VIGSGCNLDSAR	L-lactate dehydrogenase A chain	P00338	LDHA	-0.576992	-0.644263	-0.610627	1.45553
VIGVELCPEAVEDAR	tRNA (uracil-5-)-methyltransferase homolog A	Q8IZ69	TRMT2A	-0.0881621	0.753761	0.332799	0.240994
VITVDGNICTGK	NADH dehydrogenase [ubiquinone] 1 alpha subcomplex subunit 10, mitochondrial	O95299	NDUFA10	-0.0519902	-0.0053239	-0.0286571	0.361476
VIVKCPTSGR	Aspartyl aminopeptidase	Q9ULA0	DNPEP		-1.13011	-1.13011
VKACTTEEDQEK	GMP synthase [glutamine-hydrolyzing]	P49915	GMPS		-0.290403	-0.290403
VKDSDDVPMVLVGNKCDLPTR	GTPase NRas	P01111	NRAS	0.305826	0.0225957	0.164211	0.343855
VKDTDDVPMILVGNKCDLEDER	Ras-related protein Rap-1b	P61224	RAP1B	0.492239	0.725027	0.608633	0.919757
VKDTEDVPMILVGNKCDLEDER	Ras-related protein Rap-1A	P62834	RAP1A	-2.33721	0.647905	-0.844651	0.17253
VLAELPQCLR	Ras-related protein Rab-34	Q9BZG1	RAB34	1.70639	1.21528	1.46083	0.97462
VLAELPQCLRK	Ras-related protein Rab-34	Q9BZG1	RAB34	0.726754	0.555722	0.641238	1.07365
VLCPINYPLSPTR	E3 ubiquitin-protein ligase TRIM47	Q96LD4	TRIM47	0.905902		0.905902
VLCPSNSSQR	Aurora kinase A	O14965	AURKA		1.50168	1.50168
VLCSSPAPR	Palmitoyltransferase ZDHHC5	Q9C0B5	ZDHHC5		0.0229336	0.0229336
VLEPEGSPSLCLLK	Mucosa-associated lymphoid tissue lymphoma translocation protein 1	Q9UDY8	MALT1		0.80885	0.80885
VLGPCSDILKR	cAMP-dependent protein kinase type I-alpha regulatory subunit	P10644	PRKAR1A	0.358346		0.358346
VLHDAQQQCR	Acetolactate synthase-like protein	A1L0T0	ILVBL	2.99786		2.99786
VLPMNTGVEAGETACK	Ornithine aminotransferase, mitochondrial	P04181	OAT		0.659784	0.659784
VLTAEELNAAQTSVAYGCIK	Arginine--tRNA ligase, cytoplasmic	P54136	RARS1	1.8788	0.21773	1.04827	0.370029
VLTGVAGEDAECHAAK	Importin-7	O95373	IPO7		1.13177	1.13177
VLVCPIYTCLR	CBP80/20-dependent translation initiation factor	O43310	CTIF	1.45272		1.45272
VLVSPTNPPGATSSCQK	General vesicular transport factor p115	O60763	USO1	2.83609	0.915616	1.87585	0.521152
VLVVGAGGIGCELLK	SUMO-activating enzyme subunit 2	Q9UBT2	UBA2		0.505549	0.505549
VLYCCPEIFTMR	Transcription termination factor 4, mitochondrial	Q7Z6M4	MTERF4		0.465778	0.465778
VMAEANHFIDLSQIPCNGK	UDP-N-acetylglucosamine--peptide N-acetylglucosaminyltransferase 110 kDa subunit	O15294	OGT		3.12176	3.12176
VMGIVENMSGFTCPHCTECTSVFSR	Cytosolic Fe-S cluster assembly factor NUBP2	Q9Y5Y2	NUBP2		0.303693	0.303693
VMPFSTACNTPLSNFESHQNYK	Isoleucine--tRNA ligase, cytoplasmic	P41252	IARS1	0.35241	2.55603	1.45422	0.384285
VMTGDSCTR	Cytoplasmic tRNA 2-thiolation protein 2	Q2VPK5	CTU2	-0.853044	1.6978	0.42238	0.0988641
VMTIPYQPMPASSPVICAGGQDR	Poly(rC)-binding protein 1	Q15365	PCBP1	1.16077	0.529691	0.845233	0.643091
VNCLAPGLIK	Putative dehydrogenase/reductase SDR family member 4-like 1	P0CG22	DHRS4L1		1.55835	1.55835
VNCLDKFWHK	LIM and SH3 domain protein 1	Q14847	LASP1		0.937477	0.937477
VNCSQFLGLCALPGCK	Cyclin-dependent kinase inhibitor 3	Q16667	CDKN3		1.41054	1.41054
VNDGVCDCCDGTDEYNSGVICENTCKEK	Glucosidase 2 subunit beta	P14314	PRKCSH	2.51236	2.87827	2.69531	1.36505
VNFCPLPSEQCYQAPGGPEDR	Thyroid receptor-interacting protein 6	Q15654	TRIP6	1.01775	-0.146834	0.435457	0.228252
VNFCPLPSEQCYQAPGGPEDRGPAWVGSHGVLQHTQGLPADR	Thyroid receptor-interacting protein 6	Q15654	TRIP6	0.35641	5.32479	2.8406	0.339655
VNIHCPCGLVTAFVACEDGR	Trans-3-hydroxy-L-proline dehydratase	Q96EM0	L3HYPDH		-1.24683	-1.24683
VNLKRPCPFWNDISQCGR	ERO1-like protein alpha	Q96HE7	ERO1A	-0.850953	-2.20957	-1.53026	0.575168
VNQAIWLLCTGAR	40S ribosomal protein S5	P46782	RPS5		-0.0219037	-0.0219037
VNQIGSVTESLQACK	Alpha-enolase	P06733	ENO1		1.70385	1.70385
VPADEVCGCPLVR	CXXC-type zinc finger protein 1	Q9P0U4	CXXC1	0.460418	0.280101	0.37026	0.817991
VPCNTVFGSQHQMDVAFLEK	Pyridoxal-dependent decarboxylase domain-containing protein 1	Q6P996	PDXDC1		2.80435	2.80435
VPFCLQSCVKPLK	Glutaminase kidney isoform, mitochondrial	O94925	GLS	-0.7063		-0.7063
VPGAGTAPKPVSVACTQLAFSGPK	Caskin-2	Q8WXE0	CASKIN2		0.488332	0.488332
VPQCPSGR	Proteasomal ubiquitin receptor ADRM1	Q16186	ADRM1	0.819096		0.819096
VPTANVSVVDLTCR	Glyceraldehyde-3-phosphate dehydrogenase	P04406	GAPDH	2.64239		2.64239
VPTANVSVVDLTCRLEKPAK	Glyceraldehyde-3-phosphate dehydrogenase	P04406	GAPDH		-0.596442	-0.596442
VPTVCVDMSTNR	Serine/threonine-protein kinase A-Raf	P10398	ARAF		1.60129	1.60129
VQAHAAAALINFTEDCPK	Importin-5	O00410	IPO5	0.363214	0.416685	0.389949	1.36072
VQFCPFEK	39S ribosomal protein L53, mitochondrial	Q96EL3	MRPL53		-0.717452	-0.717452
VQGGVPAGSDEYEDECPHLIALSSLNR	Serine/threonine-protein kinase RIO2	Q9BVS4	RIOK2	-0.0333544	0.659407	0.313026	0.273946
VQIEAAQCPDVVVAQIDPK	Gem-associated protein 2	O14893	GEMIN2		1.0192	1.0192
VQIGVVGGSDYCK	Phosphomannomutase 1	Q92871	PMM1	0.768321		0.768321
VQRPCTSTPMIDSFVR	Ubiquitin carboxyl-terminal hydrolase 10	Q14694	USP10	0.505596	0.714864	0.61023	0.966144
VQTDAFVSNELDDPDDLQCK	Translation initiation factor eIF-2B subunit delta	Q9UI10	EIF2B4	1.64326		1.64326
VQVMDACLR	RING-box protein 2	Q9UBF6	RNF7	0.72498		0.72498
VRDGLPLSASTDYEQSTGMQECR	Vesicle-trafficking protein SEC22a	Q96IW7	SEC22A		-1.72902	-1.72902
VRNCSSPEFSK	Copine-1	Q99829	CPNE1		0.550706	0.550706
VRPCVVYGGADIGQQIR	ATP-dependent RNA helicase DDX3X	O00571	DDX3X	0.0180099	0.472157	0.245083	0.322641
VSAEAEVAPVSPEVTQEVVEEHCASPEDK	Microtubule-associated protein 1B	P46821	MAP1B		-0.0348264	-0.0348264
VSMVHGSSLETLPSCPAVTGQK	A-kinase anchor protein 11	Q9UKA4	AKAP11	-0.954397	1.28157	0.163588	0.0421517
VSPCLPVLSR	Importin subunit alpha-7	O60684	KPNA6		0.0595456	0.0595456
VSYIGVCQSK	OCIA domain-containing protein 2	Q56VL3	OCIAD2	0.477578	0.177276	0.327427	0.562688
VTCACQEHR	Ras-related protein Rab-34	Q9BZG1	RAB34	0.104608	0.156273	0.13044	0.904943
VTCLDPNPHFEK	Methyltransferase-like protein 7B	Q6UX53	METTL7B	0.727337	1.12074	0.92404	0.874435
VTDTQEAECAGPPVPDPK	Tetratricopeptide repeat protein 1	Q99614	TTC1		-0.045555	-0.045555
VTELNPDKNCIHTDDDEKISYR	Sulfide:quinone oxidoreductase, mitochondrial	Q9Y6N5	SQOR	1.48511	-0.585841	0.449637	0.131238
VTQQVNPIFSEAC	GMP reductase 2	Q9P2T1	GMPR2	-0.235844		-0.235844
VTVAGLAGKDPVQCSR	Protein/nucleic acid deglycase DJ-1	Q99497	PARK7	0.27615		0.27615
VTWDSSFCAVNPR	Coronin-1C	Q9ULV4	CORO1C		0.908924	0.908924
VVAACAMPVMK	NADH-ubiquinone oxidoreductase 75 kDa subunit, mitochondrial	P28331	NDUFS1	-2.22285	-1.17315	-1.698	0.719313
VVAQEAQSLGGQCVPVVCDSSQESEVR	Dehydrogenase/reductase SDR family member 1	Q96LJ7	DHRS1	0.200702		0.200702
VVCFNHDNTLLATGGTDGYVR	Prolactin regulatory element-binding protein	Q9HCU5	PREB		1.13198	1.13198
VVDGHLNLPVCK	General transcription factor 3C polypeptide 1	Q12789	GTF3C1	0.8878		0.8878
VVFTPSICK	Latent-transforming growth factor beta-binding protein 1	Q14766	LTBP1	0.864124	0.17776	0.520942	0.430811
VVGCSCVVVK	40S ribosomal protein S12	P25398	RPS12	-0.706574	-0.589799	-0.648186	1.24267
VVGNPCPICR	28S ribosomal protein S18b, mitochondrial	Q9Y676	MRPS18B	-0.0789776		-0.0789776
VVGSVGQHTGEPVEELALSHCGR	WD repeat-containing protein 55	Q9H6Y2	WDR55		0.713806	0.713806
VVICHLPCMNGGQCSSR	Latent-transforming growth factor beta-binding protein 1	Q14766	LTBP1	0.891043	0.845869	0.868456	1.7811
VVLDNIHGCPLR	FAST kinase domain-containing protein 2, mitochondrial	Q9NYY8	FASTKD2	0.735638		0.735638
VVLLGEGCVGK	Ras-related protein Rab-21	Q9UL25	RAB21		0.633586	0.633586
VVLNPVNAGQPLHASSHQLVDNPGCNEVNSVNCNTSWK	Inositol 1,4,5-trisphosphate receptor type 1	Q14643	ITPR1		0.252972	0.252972
VVMALGDYMGASCHACIGGTNVR	Eukaryotic initiation factor 4A-I	P60842	EIF4A1		0.492008	0.492008
VVNEINIEDLCLTK	CDGSH iron-sulfur domain-containing protein 2	Q8N5K1	CISD2		0.757631	0.757631
VVPDSCCK	CD151 antigen	P48509	CD151		0.558129	0.558129
VVSGMVNCNDDQGVLLGR	Protein-glutamine gamma-glutamyltransferase 2	P21980	TGM2	0.0675011	0.178076	0.122788	0.569703
VVVFIKPTCPYCR	Glutaredoxin-1	P35754	GLRX	-0.134264	-0.183791	-0.159028	1.00725
VVVVDCKK	Mitochondrial import inner membrane translocase subunit TIM50	Q3ZCQ8	TIMM50		-0.00631956	-0.00631956
VWNLANCK	Receptor of activated protein C kinase 1	P63244	RACK1	0.188011	0.31185	0.249931	0.81077
VYKEFCDFYAK	LIM and senescent cell antigen-like-containing domain protein 3	P0CW19	LIMS3	-0.27581		-0.27581
VYLACR	Retinol dehydrogenase 11	Q8TC12	RDH11	-0.748253		-0.748253
VYMNQVCDDTITSR	Armadillo repeat-containing X-linked protein 3	Q9UH62	ARMCX3	1.55141	-0.814775	0.368319	0.0926624
VYPYLCR	DNA replication licensing factor MCM6	Q14566	MCM6	-1.06841		-1.06841
VYTSMSDCLIK	Mitochondrial glutamate carrier 1	Q9H936	SLC25A22		3.21139	3.21139
WACLVAGGSK	CD97 antigen	P48960	CD97	2.30232		2.30232
WAGKPFELSPLVCAK	Nuclear-interacting partner of ALK	Q86WB0	ZC3HC1	0.943832		0.943832
WASGLTPAQNCPR	Tapasin	O15533	TAPBP		2.48458	2.48458
WDFTPCK	V-type proton ATPase catalytic subunit A	P38606	ATP6V1A		-0.438733	-0.438733
WEALHAAECPCGPSLIR	Cytochrome c-type heme lyase	P53701	HCCS	1.28142	7.56445	4.42294	0.405419
WKSDEVDEQVACQEVK	A-kinase anchor protein 12	Q02952	AKAP12	-1.5623	-1.2829	-1.4226	1.20539
WLTLEVCR	Muscleblind-like protein 1	Q9NR56	MBNL1	0.0148601		0.0148601
WNDNCPSWNTIDPEER	Calpain-2 catalytic subunit	P17655	CAPN2	0.358195	-0.44978	-0.0457927	0.0323843
WRCDADADCMDGSDEEACGTGVR	Prolow-density lipoprotein receptor-related protein 1	Q07954	LRP1	2.17104		2.17104
WVPEITHHCPK	Cell division control protein 42 homolog	P60953	CDC42		0.759205	0.759205
YAECGLR	Phospholipid hydroperoxide glutathione peroxidase	P36969	GPX4	-1.26333	-1.0209	-1.14212	1.1719
YAGLSTCFR	Serine--tRNA ligase, cytoplasmic	P49591	SARS1	0.351809		0.351809
YAYFNGCSSPTAPLSPMSPPGYK	Gap junction alpha-1 protein	P17302	GJA1		0.340181	0.340181
YAYTGECR	DNA-directed RNA polymerase II subunit RPB2	P30876	POLR2B	1.39894		1.39894
YCADQQPENHEVDTSVSGAGCTTYKEPLDFR	UPF0600 protein C5orf51	A6NDU8	C5orf51	1.1273		1.1273
YCANAFK	ATP-binding cassette sub-family E member 1	P61221	ABCE1		1.04617	1.04617
YCQVIR	60S ribosomal protein L3	P39023	RPL3	-0.948366	-0.359602	-0.653984	0.569813
YDDMATCMK	14-3-3 protein theta	P27348	YWHAQ	0.314004	0.632792	0.473398	0.684532
YDGYTSCPLVTGYNR	Sulfide:quinone oxidoreductase, mitochondrial	Q9Y6N5	SQOR	2.65646	0.473381	1.56492	0.411468
YEAACNR	Integrin-linked kinase-associated serine/threonine phosphatase 2C	Q9H0C8	ILKAP	0.917356	0.485875	0.701616	0.721445
YEDICPSTHNMDVPNIK	Eukaryotic translation initiation factor 5A-1	P63241	EIF5A		-0.781593	-0.781593
YEDICPSTHNMDVPNIKR	Eukaryotic translation initiation factor 5A-1	P63241	EIF5A		-1.72942	-1.72942
YEQGTGCWQGPNR	Glucosidase 2 subunit beta	P14314	PRKCSH	0.539285		0.539285
YESHPVCADLQAK	MIC	Q9NX63	CHCHD3	5.1804	1.20824	3.19432	0.450841
YFACLMR	NADH dehydrogenase [ubiquinone] 1 beta subcomplex subunit 9	Q9Y6M9	NDUFB9	3.81889	-0.229631	1.79463	0.269029
YFCHCCSVEIVPR	E3 ubiquitin-protein ligase RNF126	Q9BV68	RNF126	-0.650589	1.05682	0.203114	0.0699178
YFDSCNGDLDPEIVK	Cyclin-dependent-like kinase 5	Q00535	CDK5	-0.361837	-0.356345	-0.359091	2.31261
YFFNLSSMTCEK	Tissue factor pathway inhibitor 2	P48307	TFPI2		-0.504601	-0.504601
YFGDCKEEELLPK	Retinol dehydrogenase 14	Q9HBH5	RDH14	0.956374		0.956374
YFSNIHWCNCPK	Urokinase-type plasminogen activator	P00749	PLAU	-0.817284	-0.158443	-0.487863	0.4224
YGDGGSSFQSTTGHCVHMR	Heterogeneous nuclear ribonucleoprotein H2	P55795	HNRNPH2	-1.7876		-1.7876
YGDGGSTFQSTTGHCVHMR	Heterogeneous nuclear ribonucleoprotein H	P31943	HNRNPH1	0.0732298	0.674953	0.374091	0.365323
YGDSEFTVQSTTGHCVHMR	Heterogeneous nuclear ribonucleoprotein F	P52597	HNRNPF	-0.699938	0.205912	-0.247013	0.166122
YGEVEEMNVCDNLGDHLVGNVYVK	Splicing factor U2AF 35 kDa subunit-like protein	P0DN76	U2AF1L5		0.432292	0.432292
YGICAHENKELANAR	Palmitoyltransferase ZDHHC13	Q8IUH4	ZDHHC13	-0.360772		-0.360772
YGVVVCEADTGR	Mannose-1-phosphate guanyltransferase beta	Q9Y5P6	GMPPB	-4.23558	-3.85846	-4.04702	1.52812
YGYEIPVDMLCKR	Proteasome subunit alpha type-6	P60900	PSMA6	0.932992		0.932992
YHIQVCTTTPCMLR	NADH dehydrogenase [ubiquinone] flavoprotein 2, mitochondrial	P19404	NDUFV2		-1.25445	-1.25445
YHPLSSCLTAR	MMS19 nucleotide excision repair protein homolog	Q96T76	MMS19	1.1767	0.159019	0.667861	0.38249
YICENQDSISSK	Serum albumin	P02768	ALB		0.745442	0.745442
YICPHAPR	Acyl-protein thioesterase 2	O95372	LYPLA2	-0.0924585		-0.0924585
YIMAGFPVCPK	2',5'-phosphodiesterase 12	Q6L8Q7	PDE12	-0.880842	-0.80839	-0.844616	1.56403
YKCSVCPDYDLCSVCEGK	Sequestosome-1	Q13501	SQSTM1	-0.970578	-0.0312646	-0.500921	0.319211
YKVCNYGLTFTQK	Voltage-dependent anion-selective channel protein 3	Q9Y277	VDAC3	0.70916	-0.132301	0.28843	0.209421
YKVEYPIMYSTDPENGHIFNCIQR	Microsomal glutathione S-transferase 3	O14880	MGST3		0.830985	0.830985
YKWCEYGLTFTEK	Voltage-dependent anion-selective channel protein 2	P45880	VDAC2	0.730453	0.517595	0.624024	0.96842
YLAEVACGDDR	14-3-3 protein theta	P27348	YWHAQ	-0.178416	-0.202507	-0.190462	1.39568
YLAEVACGDDRK	14-3-3 protein theta	P27348	YWHAQ	1.19584		1.19584
YLECISCGSSDMSCER	Urokinase plasminogen activator surface receptor	Q03405	PLAUR	0.775198	1.10109	0.938143	0.96066
YLECSALQQDGVK	Rho-related GTP-binding protein RhoG	P84095	RHOG		-1.25691	-1.25691
YLECSALTQR	Ras-related C3 botulinum toxin substrate 2	P15153	RAC2	0.40654	0.431943	0.419242	1.71486
YLTNAYSRDEFTNTCPSDKEVEIAYSDVAK	Chloride intracellular channel protein 4	Q9Y696	CLIC4		-3.07259	-3.07259
YLVVNADEGEPGTCKDR	NADH dehydrogenase [ubiquinone] flavoprotein 1, mitochondrial	P49821	NDUFV1		2.1034	2.1034
YMACCLLYR	Tubulin alpha-4A chain	P68366	TUBA4A	-0.0357975	0.0641327	0.0141676	0.0840182
YMACCLLYRGDVVPK	Tubulin alpha-4A chain	P68366	TUBA4A	1.02392	0.651542	0.837732	0.856271
YMLDCR	Voltage-dependent anion-selective channel protein 3	Q9Y277	VDAC3	0.469039	0.400744	0.434892	1.30204
YNFFCQGTR	Elongation of very long chain fatty acids protein 5	Q9NYP7	ELOVL5	1.27836		1.27836
YNFFTGCPK	T-complex protein 1 subunit eta	Q99832	CCT7	0.281802	0.356677	0.31924	1.1289
YNNCWLAR	Phosphoenolpyruvate carboxykinase [GTP], mitochondrial	Q16822	PCK2		-1.86051	-1.86051
YNPTWHCIVGR	Dynein light chain 1, cytoplasmic	P63167	DYNLL1	0.456217	0.416117	0.436167	1.53397
YPHCAVNGLLVAEK	ER membrane protein complex subunit 8	O43402	EMC8	-0.577869	0.343961	-0.116954	0.0747906
YPYSCR	Leucine zipper protein 1	Q86V48	LUZP1	1.87197		1.87197
YQCACNPGYHSTPDR	Fibrillin-1	P35555	FBN1		1.00814	1.00814
YQEAAPNVANNTGPHAASCFGAK	Catenin delta-1	O60716	CTNND1	2.04822	1.95393	2.00108	1.82399
YQHLITNSFVECNR	E3 ubiquitin-protein ligase ARIH1	Q9Y4X5	ARIH1	0.0713926	0.652665	0.362029	0.365887
YRCELLYEGPPDDEAAMGIK	Elongation factor 2	P13639	EEF2	-0.250285	-0.0539845	-0.152135	0.437995
YRDCLTESNLIK	Protein-glutamine gamma-glutamyltransferase 2	P21980	TGM2	0.0946743	-0.254053	-0.0796894	0.138411
YRNPVSQCMR	TAR DNA-binding protein 43	Q13148	TARDBP	-0.283432	-0.530302	-0.406867	0.726956
YRPENTPEPVSTSVSHYGAEPTTVSPCPSSSAK	Tyrosine-protein kinase Yes	P07947	YES1	-1.77373	2.12407	0.17517	0.0255191
YRTCDAFTYTGCGGNDNNFVSR	Tissue factor pathway inhibitor 2	P48307	TFPI2	2.07976	0.411373	1.24556	0.425179
YSEEANNLIEECEQAER	ERO1-like protein alpha	Q96HE7	ERO1A	-0.208324	0.0843182	-0.0620029	0.127938
YSLDPENPTKSCK	60S ribosomal protein L17	P18621	RPL17	0.481822	0.385265	0.433543	1.15118
YSNSALGHVNCTIK	Reticulon-4	Q9NQC3	RTN4	0.918106	2.99821	1.95816	0.507481
YSNSDVIIYVGCGER	V-type proton ATPase catalytic subunit A	P38606	ATP6V1A	-8.89215		-8.89215
YSSSFCTHDRNTMEALPACLLR	Thymidine kinase, cytosolic	P04183	TK1	1.31658	0.0688811	0.692732	0.33094
YSYVCPDLVK	Actin-related protein 3	P61158	ACTR3	0.0993334	1.1777	0.638519	0.350245
YTCHVQHEGLPKPLTLR	HLA class I histocompatibility antigen, A alpha chain	P04439	HLA-A	0.461232	1.38019	0.920712	0.530646
YTCSFCGK	60S ribosomal protein L37a	P61513	RPL37A	0.237521	0.19929	0.218406	1.2551
YTGDKCELDQCWEHCR	Prolow-density lipoprotein receptor-related protein 1	Q07954	LRP1	3.32623	0.560104	1.94317	0.404729
YTGHHAYASGCTISPY	Protein-lysine 6-oxidase	P28300	LOX	-0.456184		-0.456184
YTQQGFGNLPICMAK	Monofunctional C1-tetrahydrofolate synthase, mitochondrial	Q6UB35	MTHFD1L		4.04855	4.04855
YTQSCR	Tissue factor pathway inhibitor 2	P48307	TFPI2	0.247824	0.210959	0.229391	1.29204
YTVQDESHSEWVSCVR	Receptor of activated protein C kinase 1	P63244	RACK1	0.0949553	1.10696	0.600959	0.351129
YVAAAFPSACGK	Phosphoenolpyruvate carboxykinase [GTP], mitochondrial	Q16822	PCK2		-1.07054	-1.07054
YVDIAIPCNNK	40S ribosomal protein SA	P08865	RPSA	0.434761	0.182177	0.308469	0.606621
YVECSALTQK	Cell division control protein 42 homolog	P60953	CDC42	-0.346858	-0.0517994	-0.199329	0.391875
YVENPSQVLNCER	Nuclear pore complex protein Nup155	O75694	NUP155	0.40316		0.40316
YVSVCEGPLKEQEWNTTNAK	UPF0600 protein C5orf51	A6NDU8	C5orf51		1.3972	1.3972
YWLCAATGPSIK	Receptor of activated protein C kinase 1	P63244	RACK1	0.190881	-0.0273762	0.0817525	0.228644
YYHQLTEGCGNEACTNEFCASCPTFLR	Ubiquitin-protein ligase E3A	Q05086	UBE3A	2.84366	2.56903	2.70635	1.49116
YYYDRYTQSCR	Tissue factor pathway inhibitor 2	P48307	TFPI2	0.127296	1.36716	0.747228	0.355665
